# Supplementary material for: DFT study of Ni-catalyzed intramolecular asymmetric anti-hydrometalative cyclization of alkynone: mechanism and origins of selectivity
Source: Royal Society of Chemistry journal article supplement (doi:10.1039/d3qo00701d), 2023-01-01
Supplement: d3qo00701d1.pdf [file d3qo00701d1.pdf]

† *Electronic Supplementary Information*

**DFT Study of Ni-Catalyzed Intramolecular Asymmetric *anti*-Hydrometalative  
Cyclization of Alkynone: Mechanism and Origins of Selectivity**

Jinxia Li<sup>a</sup>, Dingyi Tang<sup>a</sup>, Yu Zhang<sup>a</sup>, Weichi Chen<sup>a</sup>, Xiaoxi Su<sup>a</sup>, Peiyuan Yu<sup>\*b</sup>, Shuanglin Qu<sup>\*a</sup>

<sup>a</sup>*College of Chemistry and Chemical Engineering, Hunan University, Changsha 410082, P. R. China.*

<sup>b</sup>*Department of Chemistry, Southern University of Science and Technology, Shenzhen 518055, P. R.*

*China.*

**Table of Content**

|                                                                                                                                    |     |
|------------------------------------------------------------------------------------------------------------------------------------|-----|
| The pathway for the formation of Ni(0) species from intermediate <b>IM3</b> .....                                                  | S1  |
| The cationic alkyne insertion and <i>cis/trans</i> isomerization steps.....                                                        | S2  |
| The neutral carbonyl insertion, hydrolysis step.....                                                                               | S3  |
| The pathway for the formation 5-exocyclic product ( <i>S</i> )- <b>3a<sub>ph</sub></b> of Ph-alkynone <b>1a<sub>ph</sub></b> ..... | S4  |
| The hydrolysis steps of Ph-alkynone and <sup>t</sup> Bu-alkynone.....                                                              | S5  |
| Various possibilities for each key transition state.....                                                                           | S6  |
| The possible <i>cis/trans</i> isomerization of <b>1a<sup>t</sup><sub>Bu</sub></b> .....                                            | S7  |
| The calculated NPA charges of various alkynones.....                                                                               | S8  |
| The two insertion modes of <b>1a<sub>ph_g</sub></b> and <b>1a<sub>ph_c</sub></b> .....                                             | S9  |
| The carbonyl insertion transition states of <b>1a<sub>ph_p</sub></b> and <b>1a<sub>ph_q</sub></b> .....                            | S10 |
| NCI analysis of key states .....                                                                                                   | S11 |
| The pathway for the formation ( <i>S</i> )- <b>3a<sub>ph</sub></b> of Ph-alkynone <b>1a<sub>ph</sub></b> at 363.15 K.....          | S12 |
| Table S1-S2.....                                                                                                                   | S14 |
| Cartesian coordinates and energies for the optimized structures.....                                                               | S15 |

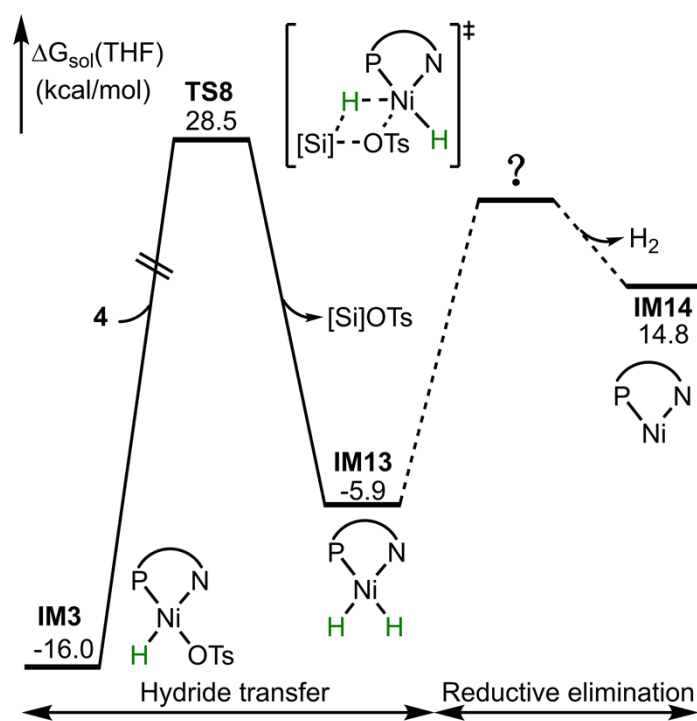

**Fig. S1.** Free energy profile of the formation of Ni(0) catalyst from the intermediate **IM3**.

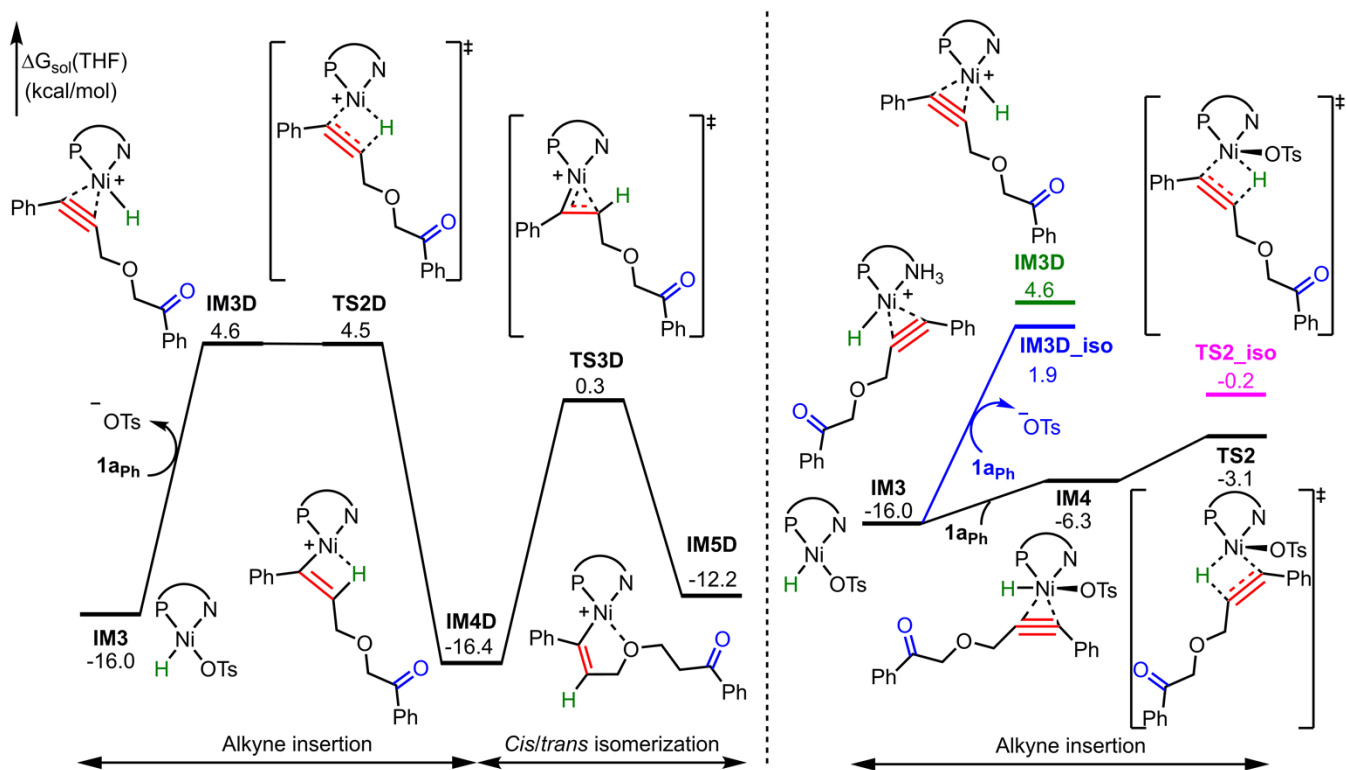

**Fig. S2.** Free energy profiles of the possible cationic alkyne insertion, *cis/trans* isomerization steps.

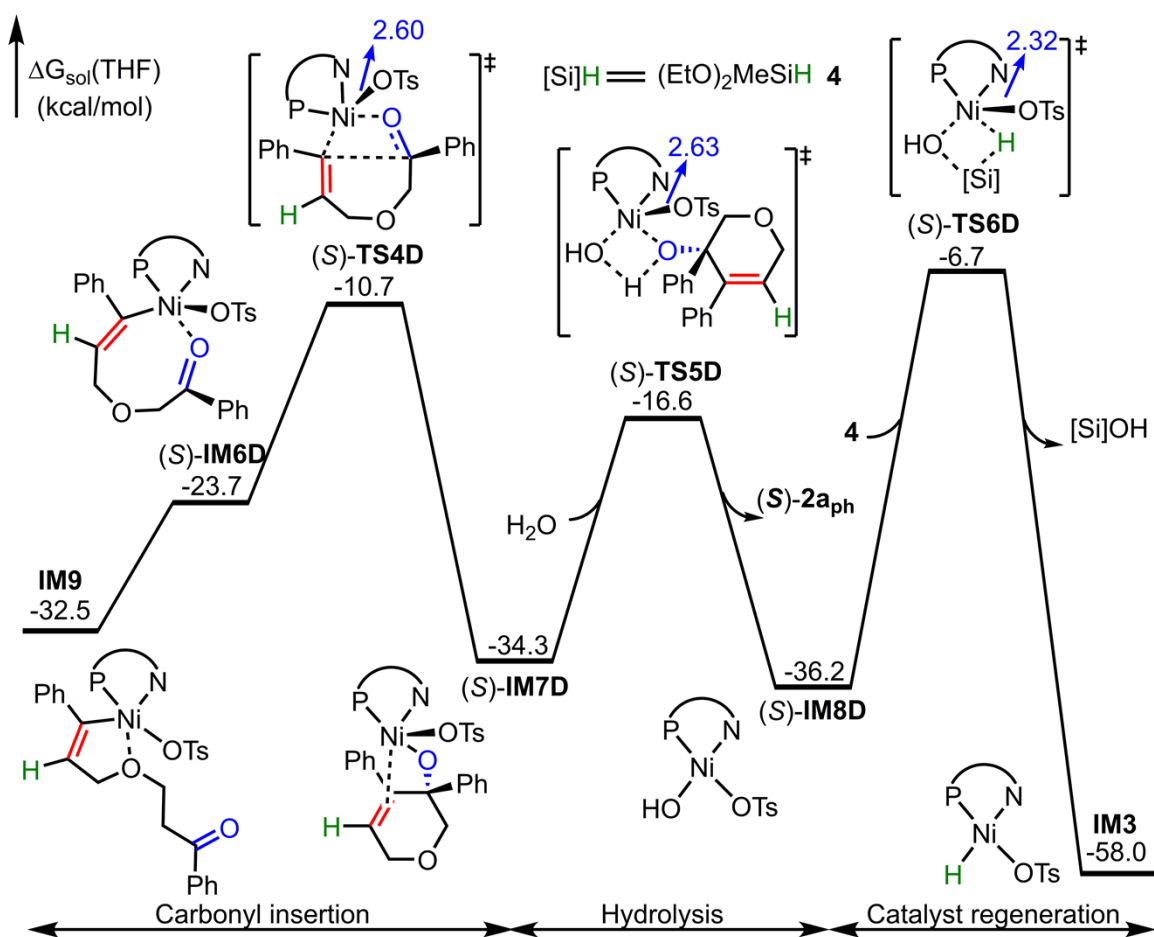

**Fig. S3** Free energy profile of the possible neutral carbonyl insertion, hydrolysis, and catalyst regeneration steps to generate 6-endocyclic product (S)-2a<sub>ph</sub>.

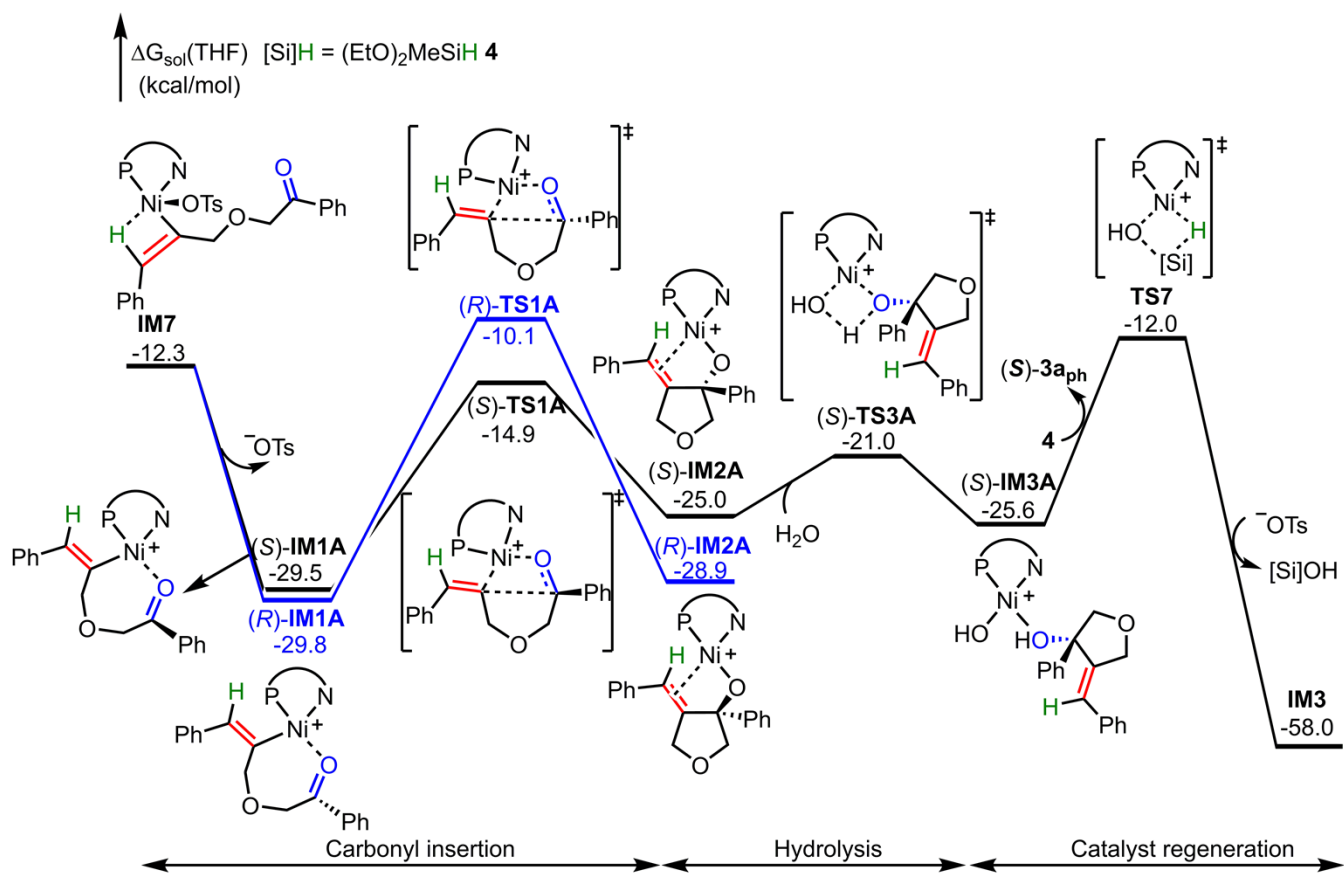

**Fig. S4** Free energy profile of Ni(II)H-catalyzed asymmetric hydrometalative cyclization of Ph-alkynone to generate 5-exocyclic product (*S*)-3a<sub>ph</sub>.

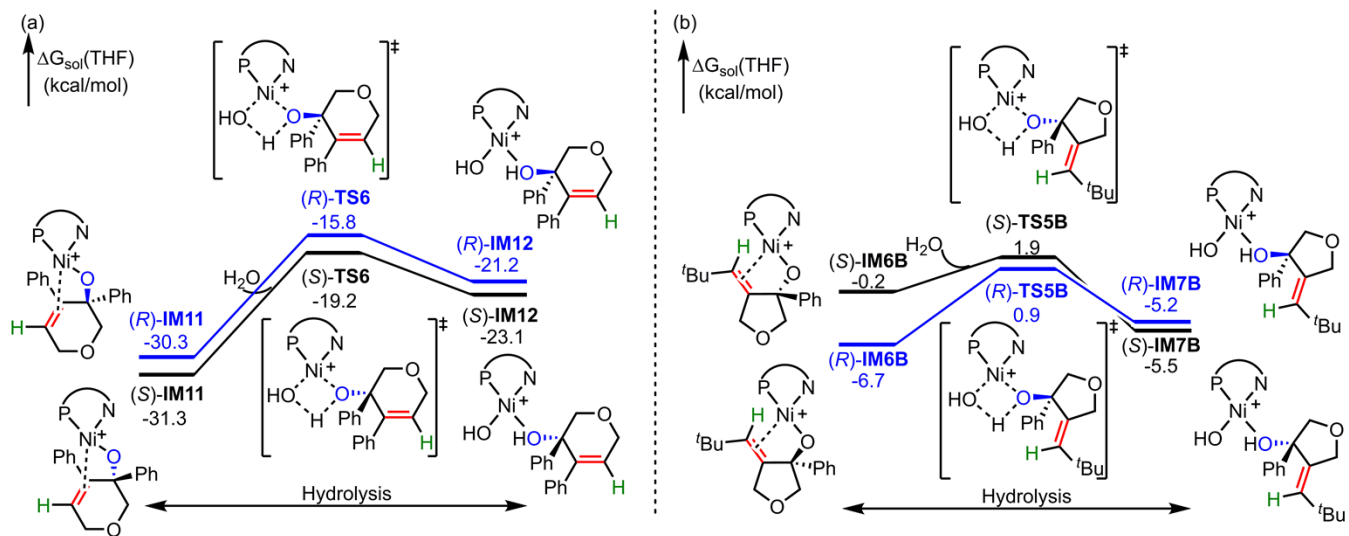

**Fig. S5** Free energy profiles of the hydrolysis steps of (a) Ph-alkynone, (b) <sup>t</sup>Bu-alkynone.

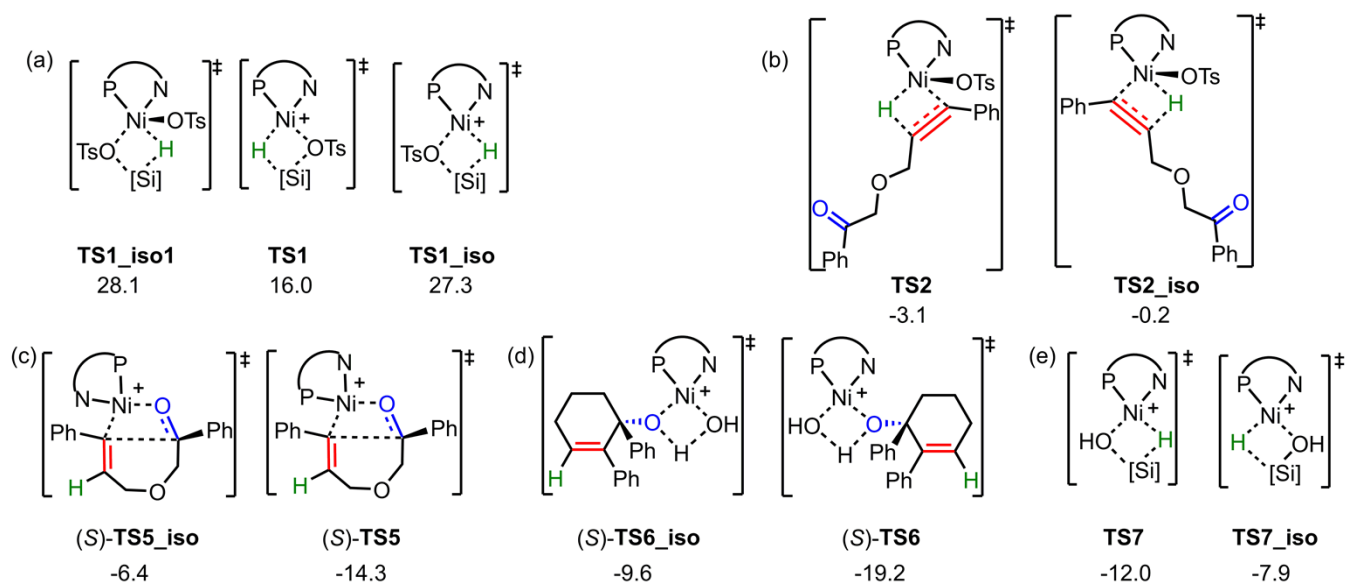

**Fig. S6.** Calculated relative energies of other possible scenarios of (a) hydride transfer **TS1/TS1\_iso/TS1\_iso1**, (b) alkyne insertion **TS2/TS2\_iso**, (c) carbonyl insertion **(S)-TS5/(S)-TS5\_iso**, (d) hydrolysis **(S)-TS6/(S)-TS6\_iso**, (e) hydride transfer **TS7/TS7\_iso**.

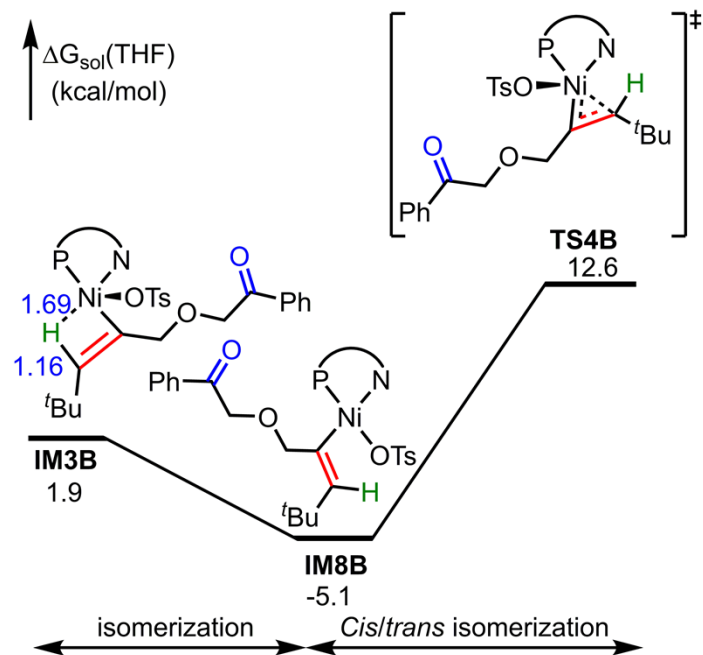

**Fig. S7.** Free energy profile for the possible *cis/trans* isomerization steps of **1a'**<sub>Bu</sub>.



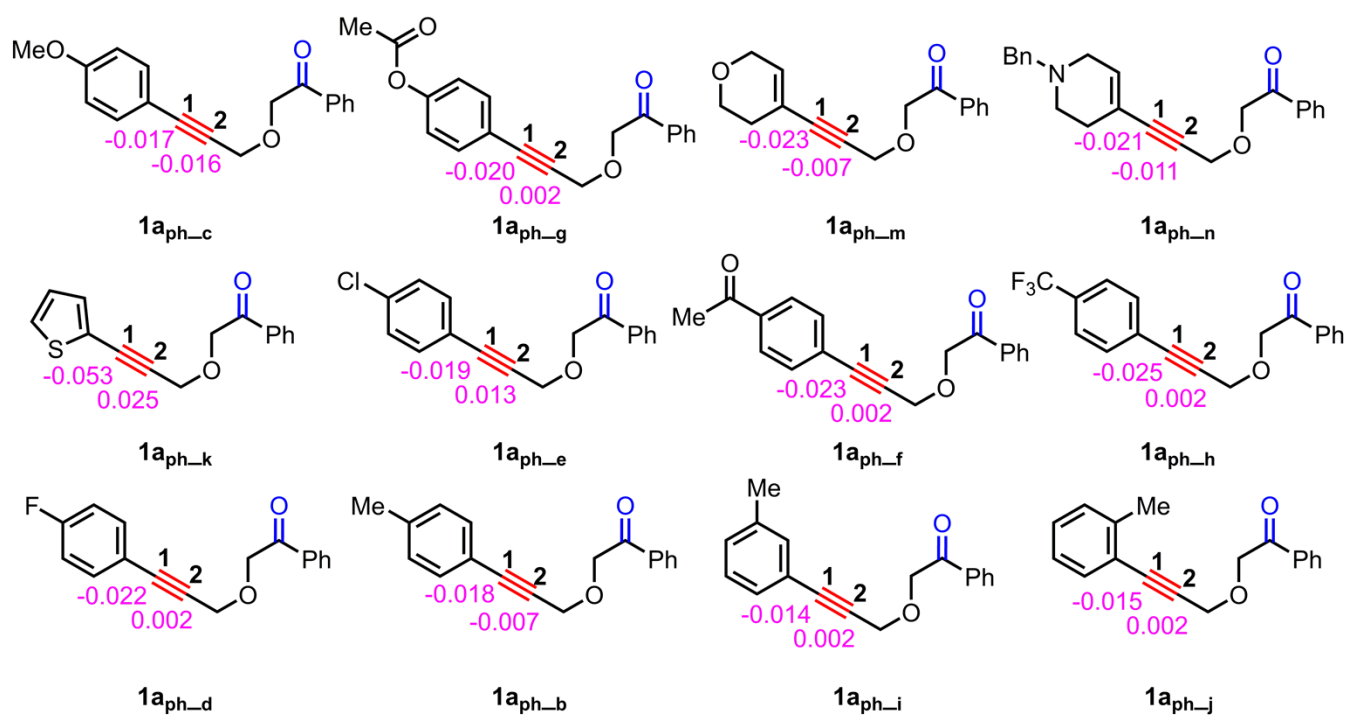

**Fig. S8.** The calculated NPA charges of various aryl-substituted alkynones and alkenyl-substituted alkynones.

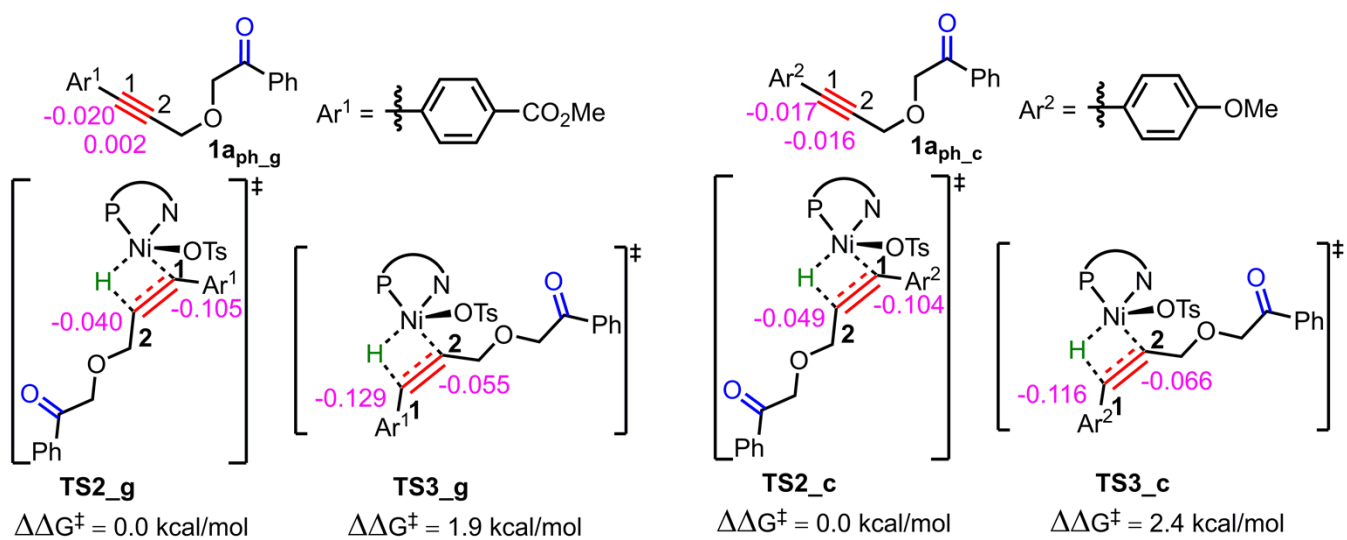

**Fig. S9.** The two insertion modes for substrates of **1a<sub>ph\_g</sub>** and **1a<sub>ph\_c</sub>**.

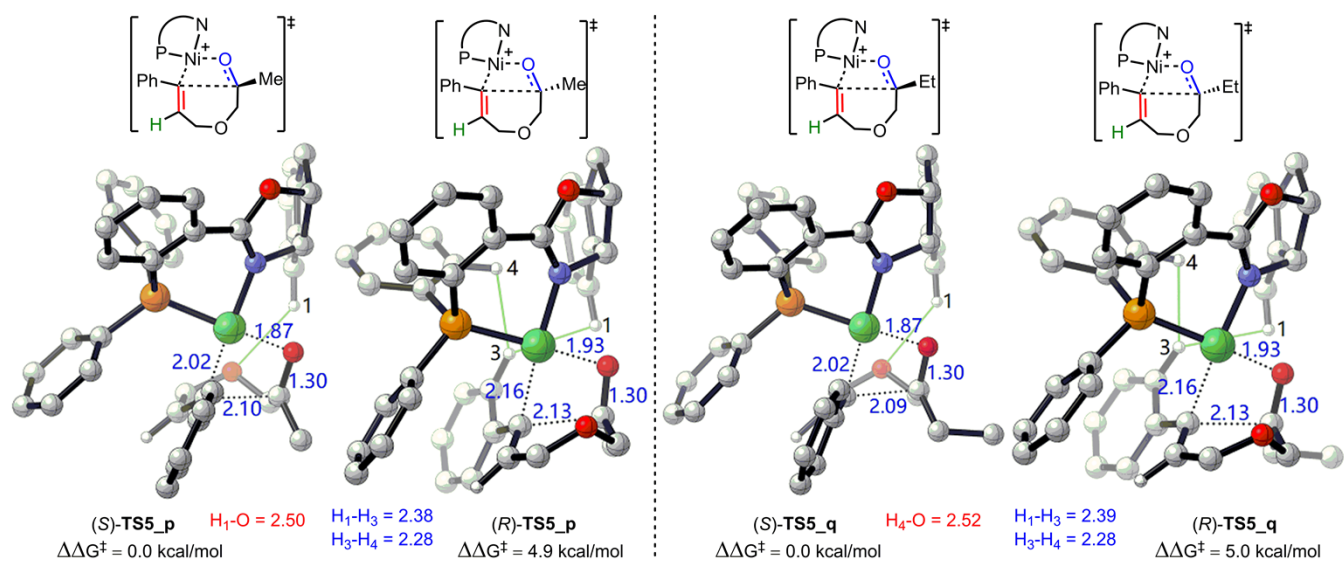

**Fig. S10.** The possible carbonyl insertion transition states for substrates of **1a<sub>ph\_p</sub>** and **1a<sub>ph\_q</sub>**. Selected bond distances given in angstroms.

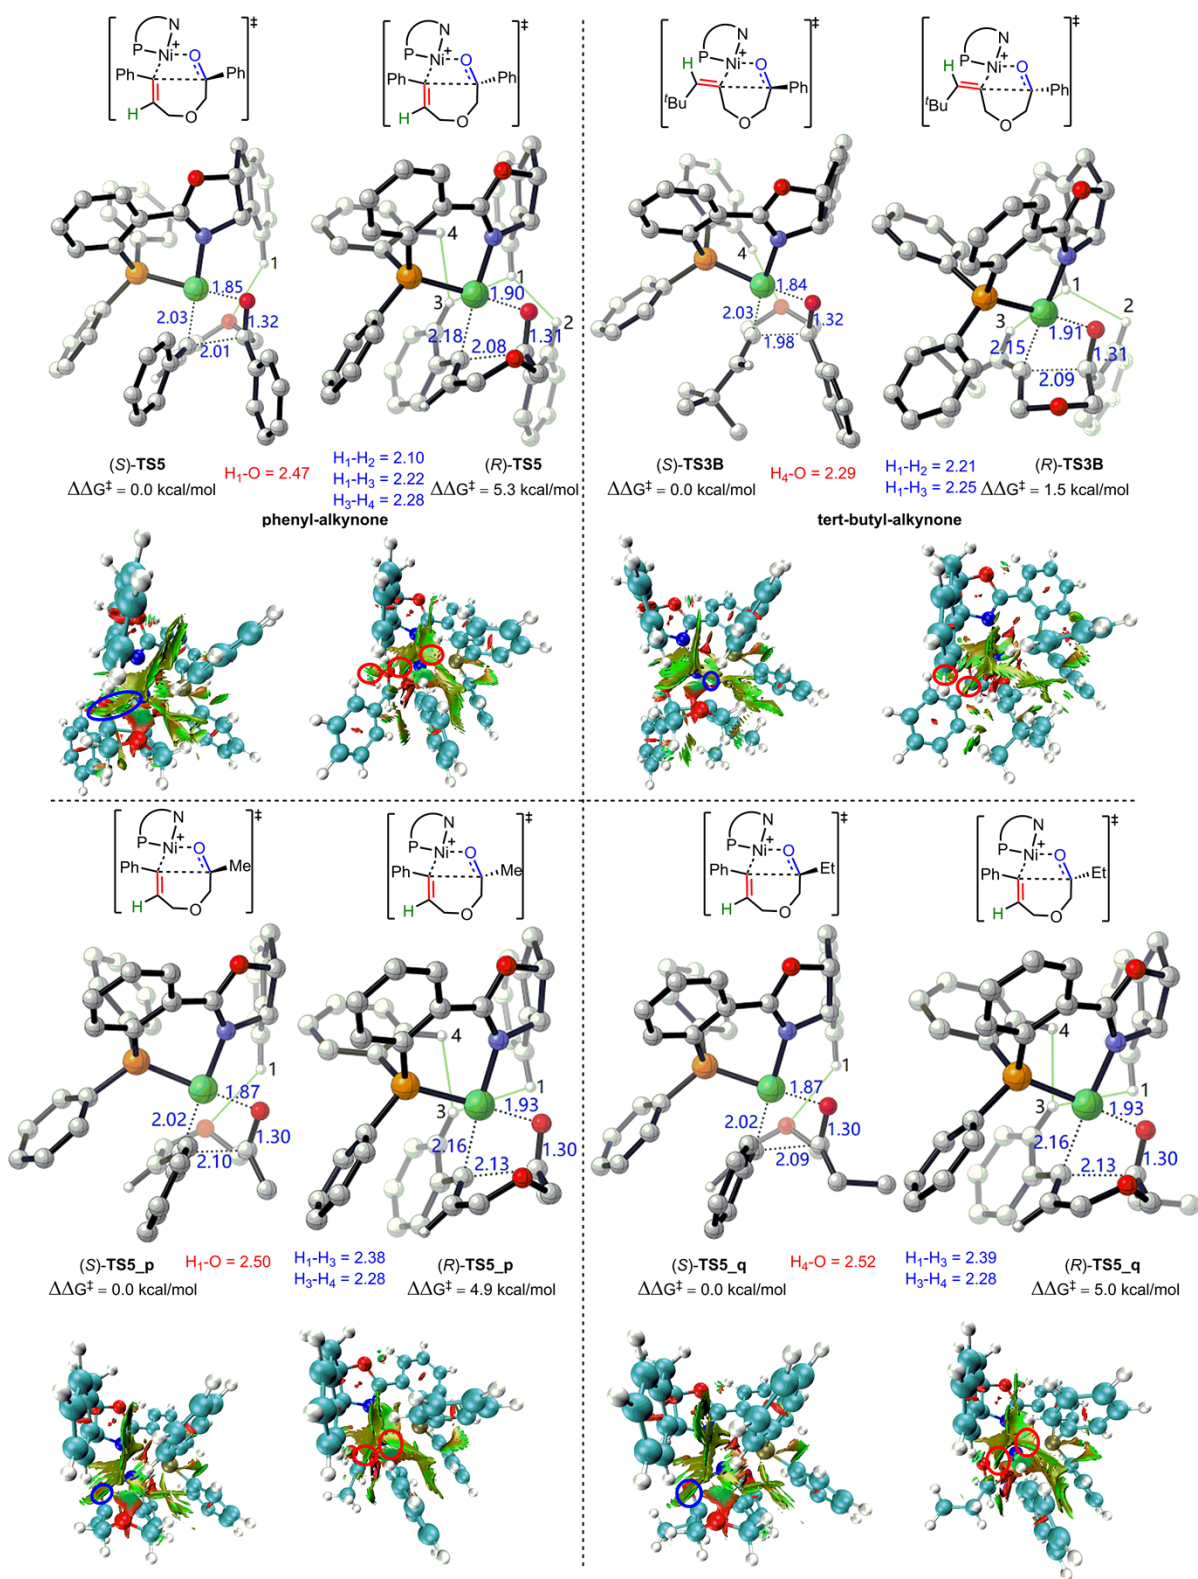

**Fig. S11.** NCI analysis of (S)-TS5, (R)-TS5, (S)-TS3B, (R)-TS3B, (S)-TS5\_p, (R)-TS5\_p, (S)-TS5\_q, and (R)-TS5\_q, with key steric repulsions highlighted by the red circles and hydrogen bonds labeled by the blue circle.

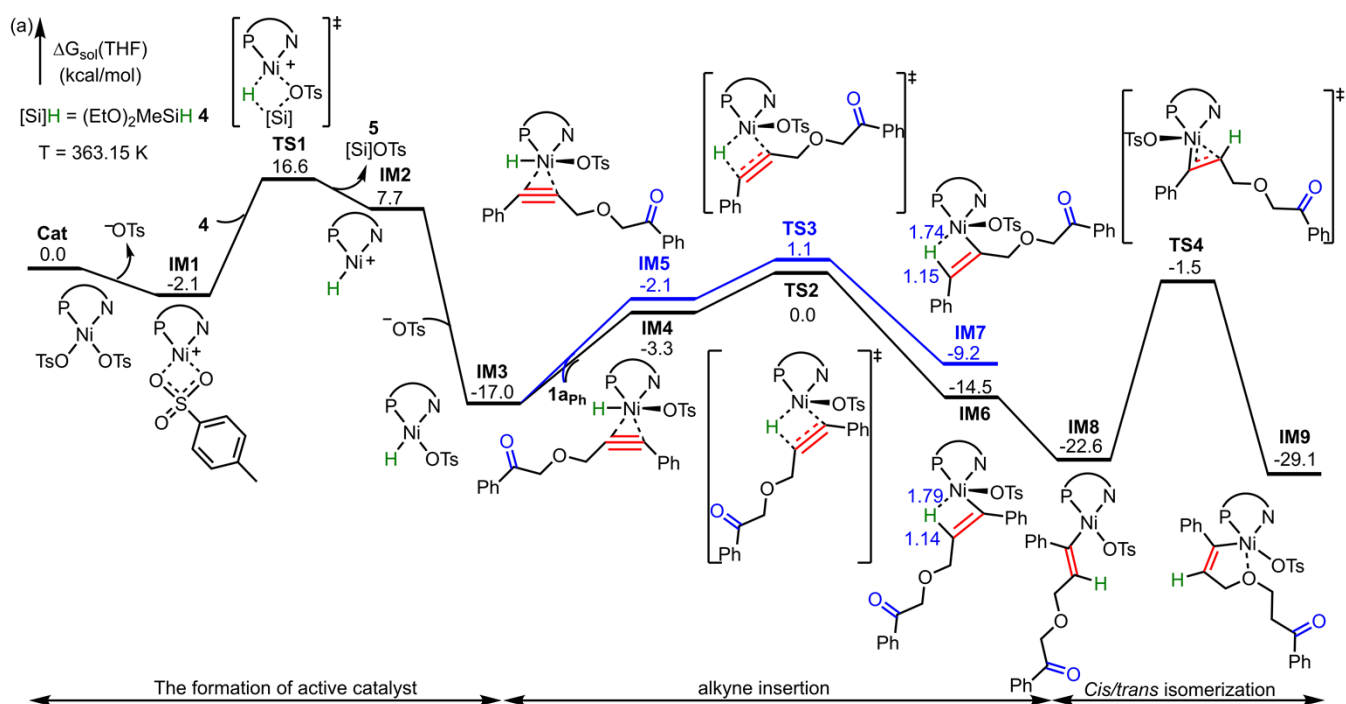

**Fig. S12.** Free energy profiles at 363.15 K for the initial steps of active catalyst formation, alkyne insertion, and *cis/trans* isomerization in the Ni(II)H-catalyzed asymmetric *anti*-hydrometalative cyclization .

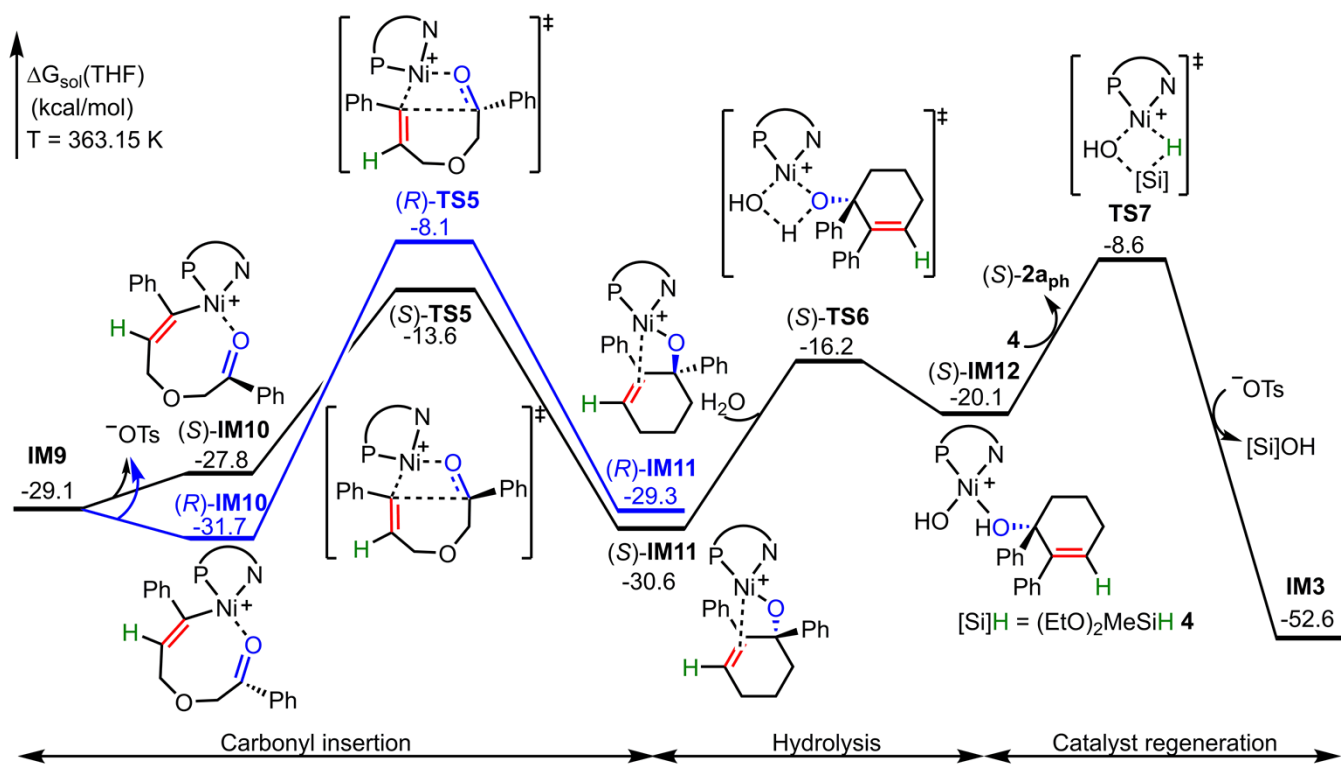

**Fig. S13.** Free energy profiles at 363.15 K for the final steps of carbonyl insertion, hydrolysis, and catalyst regeneration to produce 6-endocyclic product (S)-2a<sub>ph</sub>.

**Table S1.** The calculated energies barrier differences ( $\Delta\Delta G^\ddagger$ ) of regioselectivity-determining transition states by using various density functionals in THF. Values are given in kcal/mol.

| Energy<br>Functionals            | $\Delta\Delta G^\ddagger$ (TS3-<br>TS2) | $\Delta\Delta G^\ddagger$ (TS2B-<br>TS1B) |
|----------------------------------|-----------------------------------------|-------------------------------------------|
| <b>M06</b>                       | 1.2                                     | 1.5                                       |
| <b>M06-L</b>                     | 3.0                                     | 2.5                                       |
| <b>M06-2X</b>                    | 6.0                                     | 3.0                                       |
| <b>MN15</b>                      | 4.4                                     | 2.7                                       |
| <b><math>\omega</math>b97X-D</b> | 2.0                                     | 2.6                                       |

**Table S2.** The calculated energies barrier differences ( $\Delta\Delta G^\ddagger$ ) of enantioselectivity-determining transition states by using various density functionals in THF. Values are given in kcal/mol.

| Energy<br>Functionals            | $\Delta\Delta G^\ddagger$<br>((R)-TS5-(S)-TS5) | $\Delta\Delta G^\ddagger$<br>((R)-TS3B-(S)-TS3B) | $\Delta\Delta G^\ddagger$<br>((R)-TS1A-(S)-TS1A) |
|----------------------------------|------------------------------------------------|--------------------------------------------------|--------------------------------------------------|
| <b>M06</b>                       | 5.3                                            | 1.5                                              | 4.7                                              |
| <b>M06-L</b>                     | 8.4                                            | 2.3                                              | 5.1                                              |
| <b>M06-2X</b>                    | 5.0                                            | 2.1                                              | 3.3                                              |
| <b>MN15</b>                      | 7.4                                            | 1.7                                              | 5.6                                              |
| <b><math>\omega</math>b97X-D</b> | 7.3                                            | 3.2                                              | 5.0                                              |

## Cartesian coordinates of DFT-optimized structures for all intermediates and transition states

|                                 |           |           |           |                                 |           |           |           |
|---------------------------------|-----------|-----------|-----------|---------------------------------|-----------|-----------|-----------|
| <b>1a<sub>ph_b</sub></b>        |           |           |           | 1                               | -6.109843 | -0.649030 | 2.205288  |
| SCF Energy = -846.012917        |           |           |           | 6                               | -2.103178 | -0.829171 | -0.089461 |
| Gibbs Free Energy = -845.776948 |           |           |           | 6                               | -0.930794 | -1.120012 | -0.182564 |
| 6                               | 2.577802  | -0.720368 | 0.002731  | 6                               | 0.468726  | -1.500847 | -0.303854 |
| 6                               | 1.412135  | -1.049234 | 0.003939  | 1                               | 0.663758  | -1.897403 | -1.315643 |
| 6                               | 0.020508  | -1.477726 | 0.005566  | 1                               | 0.696424  | -2.317023 | 0.403705  |
| 1                               | -0.176996 | -2.103731 | 0.893152  | 8                               | 1.307623  | -0.380378 | -0.047704 |
| 1                               | -0.176929 | -2.110572 | -0.877165 | 6                               | 2.661833  | -0.717366 | -0.154712 |
| 8                               | -0.840414 | -0.345698 | 0.001191  | 1                               | 2.942697  | -1.510197 | 0.562252  |
| 6                               | -2.188064 | -0.724678 | 0.002574  | 1                               | 2.907207  | -1.106677 | -1.159665 |
| 1                               | -2.439020 | -1.341082 | -0.879727 | 6                               | 3.521927  | 0.514919  | 0.115181  |
| 1                               | -2.439036 | -1.334625 | 0.889350  | 8                               | 3.016000  | 1.590379  | 0.372962  |
| 6                               | -3.072097 | 0.520334  | -0.001946 | 6                               | 5.008065  | 0.343521  | 0.048169  |
| 8                               | -2.586626 | 1.635344  | -0.005914 | 6                               | 5.805833  | 1.470077  | 0.294415  |
| 6                               | -4.554585 | 0.310200  | -0.001249 | 6                               | 5.624305  | -0.881118 | -0.247194 |
| 6                               | -5.374120 | 1.448007  | -0.005282 | 6                               | 7.192152  | 1.375512  | 0.246689  |
| 6                               | -5.146957 | -0.960949 | 0.003224  | 1                               | 5.308335  | 2.406570  | 0.520754  |
| 6                               | -6.758459 | 1.318868  | -0.004852 | 6                               | 7.013905  | -0.975081 | -0.294916 |
| 1                               | -4.894902 | 2.420676  | -0.008704 | 1                               | 5.029150  | -1.767019 | -0.441390 |
| 6                               | -6.534588 | -1.089537 | 0.003644  | 6                               | 7.798951  | 0.151861  | -0.048295 |
| 1                               | -4.534710 | -1.856434 | 0.006394  | 1                               | 7.802493  | 2.252468  | 0.438661  |
| 6                               | -7.341416 | 0.048948  | -0.000389 | 1                               | 7.483593  | -1.926425 | -0.524151 |
| 1                               | -7.385778 | 2.204791  | -0.007990 | 1                               | 8.881467  | 0.076910  | -0.085782 |
| 1                               | -6.985770 | -2.076763 | 0.007116  | 8                               | -7.516170 | 0.489825  | 0.445303  |
| 1                               | -8.422367 | -0.052997 | -0.000050 | 6                               | -8.226708 | 1.140513  | -0.596679 |
| 6                               | 3.949905  | -0.329782 | 0.001333  | 1                               | -9.243406 | 1.278031  | -0.227392 |
| 6                               | 4.638440  | -0.120674 | 1.209564  | 1                               | -7.790592 | 2.119492  | -0.831133 |
| 6                               | 4.641781  | -0.140992 | -1.208410 | 1                               | -8.251808 | 0.531304  | -1.508812 |
| 6                               | 5.974735  | 0.262251  | 1.200987  | <b>1a<sub>ph_d</sub></b>        |           |           |           |
| 1                               | 4.111368  | -0.255851 | 2.147913  | SCF Energy = -905.91877         |           |           |           |
| 6                               | 5.978000  | 0.241996  | -1.202631 | Gibbs Free Energy = -905.716369 |           |           |           |
| 1                               | 4.117245  | -0.291933 | -2.145780 | 6                               | -2.601765 | -0.714480 | 0.000056  |
| 6                               | 6.669261  | 0.447263  | -0.001482 | 6                               | -1.438059 | -1.049314 | 0.000140  |
| 1                               | 6.489910  | 0.424005  | 2.143966  | 6                               | -0.047217 | -1.481572 | 0.000206  |
| 1                               | 6.495759  | 0.387864  | -2.146797 | 1                               | 0.147521  | -2.111921 | -0.884838 |
| 6                               | 8.127260  | 0.831281  | -0.002939 | 1                               | 0.147505  | -2.111655 | 0.885447  |
| 1                               | 8.768903  | -0.058602 | -0.002555 | 8                               | 0.814512  | -0.351220 | 0.000046  |
| 1                               | 8.385063  | 1.417418  | -0.889645 | 6                               | 2.162495  | -0.731050 | 0.000058  |
| 1                               | 8.386337  | 1.419407  | 0.882019  | 1                               | 2.412761  | -1.343998 | 0.884775  |
| <b>1a<sub>ph_c</sub></b>        |           |           |           | 1                               | 2.412725  | -1.344172 | -0.884545 |
| SCF Energy = -921.219379        |           |           |           | 6                               | 3.045972  | 0.514672  | -0.000082 |
| Gibbs Free Energy = -920.977701 |           |           |           | 8                               | 2.558843  | 1.628964  | -0.000191 |
| 6                               | -5.497958 | 0.494332  | -0.934792 | 6                               | 4.528225  | 0.305579  | -0.000050 |
| 6                               | -4.151771 | 0.151602  | -1.035199 | 6                               | 5.347064  | 1.443937  | -0.000119 |
| 6                               | -3.481462 | -0.483182 | 0.021880  | 6                               | 5.121254  | -0.965307 | 0.000047  |
| 6                               | -4.206032 | -0.769206 | 1.197623  | 6                               | 6.731451  | 1.315512  | -0.000092 |
| 6                               | -5.544768 | -0.433780 | 1.305123  | 1                               | 4.867429  | 2.416399  | -0.000194 |
| 6                               | -6.201312 | 0.201049  | 0.239830  | 6                               | 6.508922  | -1.093117 | 0.000075  |
| 1                               | -5.983837 | 0.985272  | -1.768495 | 1                               | 4.509597  | -1.861224 | 0.000095  |
| 1                               | -3.605554 | 0.380018  | -1.943983 | 6                               | 7.315061  | 0.045881  | 0.000005  |
| 1                               | -3.700011 | -1.256639 | 2.023840  | 1                               | 7.358294  | 2.201754  | -0.000152 |
|                                 |           |           |           | 1                               | 6.960694  | -2.080061 | 0.000153  |



|   |           |           |           |
|---|-----------|-----------|-----------|
| 1 | 8.396054  | -0.055461 | 0.000035  |
| 6 | -3.971372 | -0.316041 | 0.000016  |
| 6 | -4.658190 | -0.116458 | -1.212313 |
| 6 | -4.658085 | -0.115920 | 1.212317  |
| 6 | -5.993809 | 0.270624  | -1.217027 |
| 1 | -4.131906 | -0.266241 | -2.148307 |
| 6 | -5.993705 | 0.271166  | 1.216974  |
| 1 | -4.131724 | -0.265289 | 2.148334  |
| 6 | -6.639807 | 0.457586  | -0.000039 |
| 1 | -6.537065 | 0.429608  | -2.141450 |
| 1 | -6.536881 | 0.430564  | 2.141374  |
| 9 | -7.934717 | 0.832174  | -0.000067 |

**1a<sub>ph\_e</sub>**

SCF Energy = -1266.284745

Gibbs Free Energy = -1266.084492

|    |           |           |           |
|----|-----------|-----------|-----------|
| 6  | -2.111937 | 0.861001  | -0.000001 |
| 6  | -0.944550 | 1.181631  | -0.000001 |
| 6  | 0.455108  | 1.587168  | 0.000028  |
| 1  | 0.662926  | 2.214042  | 0.885064  |
| 1  | 0.662955  | 2.214073  | -0.884979 |
| 8  | 1.285960  | 0.436717  | 0.000020  |
| 6  | 2.644513  | 0.778787  | 0.000033  |
| 1  | 2.911255  | 1.384064  | -0.884868 |
| 1  | 2.911249  | 1.384019  | 0.884965  |
| 6  | 3.490535  | -0.493022 | -0.000000 |
| 8  | 2.968900  | -1.591654 | -0.000028 |
| 6  | 4.977868  | -0.328663 | -0.000002 |
| 6  | 5.762375  | -1.490995 | -0.000073 |
| 6  | 5.608378  | 0.924080  | 0.000064  |
| 6  | 7.149942  | -1.403750 | -0.000079 |
| 1  | 5.254176  | -2.448827 | -0.000122 |
| 6  | 6.999186  | 1.010540  | 0.000059  |
| 1  | 5.023734  | 1.837867  | 0.000122  |
| 6  | 7.771003  | -0.152006 | -0.000013 |
| 1  | 7.750170  | -2.308205 | -0.000136 |
| 1  | 7.480162  | 1.983561  | 0.000112  |
| 1  | 8.854517  | -0.082887 | -0.000018 |
| 6  | -3.480186 | 0.460193  | -0.000005 |
| 6  | -4.510479 | 1.417408  | -0.000104 |
| 6  | -3.820490 | -0.904886 | 0.000094  |
| 6  | -5.844601 | 1.024969  | -0.000101 |
| 1  | -4.256805 | 2.471723  | -0.000181 |
| 6  | -5.152520 | -1.303731 | 0.000092  |
| 1  | -3.030754 | -1.647788 | 0.000170  |
| 6  | -6.154611 | -0.334232 | -0.000003 |
| 1  | -6.638612 | 1.762518  | -0.000177 |
| 1  | -5.414817 | -2.355211 | 0.000166  |
| 17 | -7.838015 | -0.833906 | 0.000001  |

**1a<sub>ph\_f</sub>**

SCF Energy = -959.347935

Gibbs Free Energy = -959.102897

|   |           |           |          |
|---|-----------|-----------|----------|
| 6 | -1.753330 | -0.946984 | 0.000073 |
|---|-----------|-----------|----------|

|   |           |           |           |
|---|-----------|-----------|-----------|
| 6 | -0.580378 | -1.247963 | 0.000126  |
| 6 | 0.825529  | -1.629951 | 0.000162  |
| 1 | 1.041988  | -2.254187 | -0.884631 |
| 1 | 1.042072  | -2.253742 | 0.885248  |
| 8 | 1.637783  | -0.466765 | -0.000157 |
| 6 | 3.001909  | -0.787133 | -0.000217 |
| 1 | 3.278100  | -1.388080 | 0.884641  |
| 1 | 3.278077  | -1.387806 | -0.885275 |
| 6 | 3.827114  | 0.498377  | -0.000032 |
| 8 | 3.287283  | 1.588202  | 0.000093  |
| 6 | 5.316769  | 0.358215  | -0.000010 |
| 6 | 6.082364  | 1.533108  | 0.000301  |
| 6 | 5.967426  | -0.884199 | -0.000315 |
| 6 | 7.471151  | 1.468279  | 0.000336  |
| 1 | 5.558810  | 2.482630  | 0.000515  |
| 6 | 7.359434  | -0.948166 | -0.000304 |
| 1 | 5.397688  | -1.807358 | -0.000563 |
| 6 | 8.112340  | 0.226720  | 0.000032  |
| 1 | 8.056701  | 2.382297  | 0.000606  |
| 1 | 7.856072  | -1.913275 | -0.000557 |
| 1 | 9.196821  | 0.175120  | 0.000039  |
| 6 | -3.127962 | -0.572869 | 0.000043  |
| 6 | -4.140384 | -1.553309 | 0.000202  |
| 6 | -3.491498 | 0.786453  | -0.000145 |
| 6 | -5.474497 | -1.178681 | 0.000172  |
| 1 | -3.861497 | -2.601407 | 0.000348  |
| 6 | -4.831921 | 1.151702  | -0.000180 |
| 1 | -2.713266 | 1.541406  | -0.000263 |
| 6 | -5.839582 | 0.176328  | -0.000023 |
| 1 | -6.266064 | -1.919583 | 0.000296  |
| 1 | -5.089477 | 2.205064  | -0.000327 |
| 6 | -7.296002 | 0.516215  | -0.000043 |
| 6 | -7.701598 | 1.978575  | -0.000248 |
| 1 | -8.789683 | 2.039317  | -0.000287 |
| 1 | -7.307012 | 2.493805  | 0.882030  |
| 1 | -7.306943 | 2.493604  | -0.882608 |
| 8 | -8.141777 | -0.365949 | 0.000215  |

**1a<sub>ph\_g</sub>**

SCF Energy = -1034.577405

Gibbs Free Energy = -1034.332358

|   |           |           |           |
|---|-----------|-----------|-----------|
| 6 | -4.869921 | -0.546154 | -0.849214 |
| 6 | -3.531719 | -0.916942 | -0.778268 |
| 6 | -2.661878 | -0.323618 | 0.154474  |
| 6 | -3.167925 | 0.663004  | 1.020198  |
| 6 | -4.503875 | 1.038065  | 0.954482  |
| 6 | -5.346653 | 0.430542  | 0.025479  |
| 1 | -5.534306 | -1.013552 | -1.562362 |
| 1 | -3.146366 | -1.674323 | -1.451795 |
| 1 | -2.503672 | 1.130079  | 1.738498  |
| 1 | -4.907309 | 1.799890  | 1.612118  |
| 6 | -1.291095 | -0.711742 | 0.221139  |
| 6 | -0.125172 | -1.033158 | 0.281603  |
| 6 | 1.268233  | -1.448927 | 0.364900  |
| 1 | 1.455502  | -2.268878 | -0.349886 |

|   |           |           |           |
|---|-----------|-----------|-----------|
| 1 | 1.479368  | -1.852809 | 1.370638  |
| 8 | 2.121940  | -0.346615 | 0.088953  |
| 6 | 3.472293  | -0.710220 | 0.161397  |
| 1 | 3.734218  | -1.106881 | 1.159024  |
| 1 | 3.719195  | -1.505726 | -0.564676 |
| 6 | 4.347478  | 0.507577  | -0.126753 |
| 8 | 3.853364  | 1.592493  | -0.367267 |
| 6 | 5.831019  | 0.309179  | -0.099437 |
| 6 | 6.642454  | 1.421606  | -0.364783 |
| 6 | 6.432201  | -0.927214 | 0.177576  |
| 6 | 8.027548  | 1.301523  | -0.353853 |
| 1 | 6.156556  | 2.367591  | -0.576328 |
| 6 | 7.820579  | -1.046645 | 0.188528  |
| 1 | 5.826362  | -1.802588 | 0.386056  |
| 6 | 8.619308  | 0.066327  | -0.076947 |
| 1 | 8.648622  | 2.167520  | -0.560467 |
| 1 | 8.278656  | -2.006834 | 0.403847  |
| 1 | 9.700862  | -0.028472 | -0.068137 |
| 8 | -6.649634 | 0.920125  | -0.017662 |
| 6 | -7.721143 | 0.075680  | -0.160644 |
| 8 | -7.637835 | -1.122810 | -0.258764 |
| 6 | -8.993709 | 0.881863  | -0.170324 |
| 1 | -9.844619 | 0.211614  | -0.282428 |
| 1 | -9.082677 | 1.450892  | 0.759287  |
| 1 | -8.971198 | 1.602448  | -0.992787 |

**1a<sub>ph\_h</sub>**

SCF Energy = -1143.729192

Gibbs Free Energy = -1143.518595

|   |           |           |           |
|---|-----------|-----------|-----------|
| 6 | -1.294367 | -0.980425 | -0.007121 |
| 6 | -0.120523 | -1.276306 | 0.001163  |
| 6 | 1.287530  | -1.651521 | 0.011505  |
| 1 | 1.510216  | -2.286694 | -0.863866 |
| 1 | 1.503817  | -2.261885 | 0.905948  |
| 8 | 2.092942  | -0.484041 | -0.001883 |
| 6 | 3.459101  | -0.796214 | 0.007519  |
| 1 | 3.735401  | -1.383070 | 0.901700  |
| 1 | 3.742020  | -1.407353 | -0.868144 |
| 6 | 4.276201  | 0.494501  | -0.007171 |
| 8 | 3.729156  | 1.580546  | -0.023985 |
| 6 | 5.766614  | 0.363970  | -0.000070 |
| 6 | 6.524637  | 1.543694  | -0.013813 |
| 6 | 6.425186  | -0.874115 | 0.019472  |
| 6 | 7.913797  | 1.487806  | -0.008183 |
| 1 | 5.995047  | 2.489742  | -0.028836 |
| 6 | 7.817560  | -0.929101 | 0.025112  |
| 1 | 5.861372  | -1.800852 | 0.030423  |
| 6 | 8.562904  | 0.250522  | 0.011288  |
| 1 | 8.493474  | 2.405490  | -0.018908 |
| 1 | 8.320384  | -1.890881 | 0.040254  |
| 1 | 9.647685  | 0.205934  | 0.015688  |
| 6 | -2.670691 | -0.609037 | -0.016305 |
| 6 | -3.678407 | -1.590603 | -0.036375 |
| 6 | -3.037645 | 0.749576  | -0.009712 |
| 6 | -5.017676 | -1.221614 | -0.046718 |

|   |           |           |           |
|---|-----------|-----------|-----------|
| 1 | -3.398900 | -2.638106 | -0.046662 |
| 6 | -4.378227 | 1.113507  | -0.020235 |
| 1 | -2.262039 | 1.506857  | 0.000650  |
| 6 | -5.370034 | 0.129935  | -0.039048 |
| 1 | -5.792498 | -1.979354 | -0.069163 |
| 1 | -4.658820 | 2.160525  | -0.022081 |
| 6 | -6.818209 | 0.525113  | 0.011446  |
| 9 | -7.608989 | -0.381304 | -0.605649 |
| 9 | -7.034464 | 1.722398  | -0.576901 |
| 9 | -7.263265 | 0.628848  | 1.286264  |

**1a<sub>ph\_i</sub>**

SCF Energy = -846.012768

Gibbs Free Energy = -845.774773

|   |           |           |           |
|---|-----------|-----------|-----------|
| 6 | -2.687281 | -0.961207 | -0.003414 |
| 6 | -1.514767 | -1.263334 | -0.007073 |
| 6 | -0.110721 | -1.651100 | -0.012051 |
| 1 | 0.105912  | -2.266373 | -0.903210 |
| 1 | 0.107260  | -2.283576 | 0.866624  |
| 8 | 0.709472  | -0.491442 | -0.001551 |
| 6 | 2.070146  | -0.821260 | -0.005683 |
| 1 | 2.343663  | -1.432318 | 0.873445  |
| 1 | 2.342093  | -1.416767 | -0.895915 |
| 6 | 2.906922  | 0.456131  | 0.004670  |
| 8 | 2.379105  | 1.551783  | 0.014187  |
| 6 | 4.395929  | 0.301962  | 0.002490  |
| 6 | 5.172359  | 1.469603  | 0.011939  |
| 6 | 5.035306  | -0.946182 | -0.008490 |
| 6 | 6.560539  | 1.392200  | 0.010466  |
| 1 | 4.657270  | 2.423721  | 0.020339  |
| 6 | 6.426736  | -1.022871 | -0.009965 |
| 1 | 4.456961  | -1.863907 | -0.015943 |
| 6 | 7.190457  | 0.144947  | -0.000491 |
| 1 | 7.154373  | 2.300871  | 0.017835  |
| 1 | 6.914475  | -1.992509 | -0.018490 |
| 1 | 8.274450  | 0.083441  | -0.001646 |
| 6 | -4.063445 | -0.583187 | 0.001189  |
| 6 | -4.419079 | 0.778232  | -0.014193 |
| 6 | -5.074891 | -1.557615 | 0.019340  |
| 6 | -5.755907 | 1.175509  | -0.010651 |
| 6 | -6.410717 | -1.165192 | 0.021147  |
| 1 | -4.804315 | -2.607759 | 0.030037  |
| 6 | -6.749626 | 0.186331  | 0.005852  |
| 1 | -7.192528 | -1.918580 | 0.032979  |
| 1 | -7.795721 | 0.480888  | 0.005881  |
| 1 | -3.630737 | 1.524014  | -0.029378 |
| 6 | -6.129453 | 2.637586  | -0.013347 |
| 1 | -6.594007 | 2.928108  | 0.936000  |
| 1 | -5.252991 | 3.272836  | -0.163002 |
| 1 | -6.849823 | 2.861872  | -0.807065 |

**1a<sub>ph\_j</sub>**

SCF Energy = -846.014709

Gibbs Free Energy = -845.777002



**1a<sub>ph\_n</sub>**

SCF Energy = -1095.519545

Gibbs Free Energy = -1095.173102

|   |           |           |           |
|---|-----------|-----------|-----------|
| 6 | -0.452640 | 0.149574  | 0.689534  |
| 6 | 0.672557  | 0.598587  | 0.661262  |
| 6 | 2.010021  | 1.174235  | 0.654854  |
| 1 | 2.244895  | 1.586953  | 1.651582  |
| 1 | 2.053330  | 2.020354  | -0.053771 |
| 8 | 2.962155  | 0.182623  | 0.293476  |
| 6 | 4.263390  | 0.698646  | 0.276452  |
| 1 | 4.359671  | 1.538073  | -0.435895 |
| 1 | 4.557592  | 1.094454  | 1.265341  |
| 6 | 5.245394  | -0.399643 | -0.125056 |
| 8 | 4.859136  | -1.524546 | -0.379289 |
| 6 | 6.695468  | -0.033784 | -0.192328 |
| 6 | 7.604659  | -1.036760 | -0.557979 |
| 6 | 7.173123  | 1.253875  | 0.091595  |
| 6 | 8.964638  | -0.759216 | -0.638319 |
| 1 | 7.213528  | -2.024909 | -0.773171 |
| 6 | 8.536387  | 1.531261  | 0.010674  |
| 1 | 6.489954  | 2.046899  | 0.376498  |
| 6 | 9.433075  | 0.526182  | -0.353918 |
| 1 | 9.661936  | -1.541330 | -0.921957 |
| 1 | 8.898611  | 2.530279  | 0.231862  |
| 1 | 10.494917 | 0.743944  | -0.416353 |
| 6 | -1.752578 | -0.433764 | 0.655076  |
| 6 | -2.730544 | -0.044185 | 1.494949  |
| 6 | -1.992845 | -1.513317 | -0.386243 |
| 6 | -4.120598 | -0.628088 | 1.453290  |
| 1 | -2.521343 | 0.710747  | 2.248680  |
| 6 | -3.310477 | -2.255952 | -0.112240 |
| 1 | -2.000249 | -1.055137 | -1.383955 |
| 1 | -1.151740 | -2.215407 | -0.384752 |
| 1 | -4.866669 | 0.164377  | 1.573290  |
| 1 | -4.258369 | -1.302338 | 2.312680  |
| 1 | -3.593521 | -2.863035 | -0.978671 |
| 1 | -3.171470 | -2.940470 | 0.732958  |
| 7 | -4.422932 | -1.366287 | 0.224770  |
| 6 | -4.794365 | -0.480147 | -0.880878 |
| 1 | -4.837130 | -1.101341 | -1.785164 |
| 1 | -4.044199 | 0.305094  | -1.076507 |
| 6 | -6.142788 | 0.172049  | -0.660820 |
| 6 | -7.216880 | -0.573579 | -0.159618 |
| 6 | -6.343986 | 1.518395  | -0.976427 |
| 6 | -8.467210 | 0.015713  | 0.013387  |
| 1 | -7.047839 | -1.611880 | 0.106304  |
| 6 | -7.596989 | 2.110528  | -0.808843 |
| 1 | -5.511889 | 2.107238  | -1.354027 |
| 6 | -8.662382 | 1.359832  | -0.313566 |
| 1 | -9.292078 | -0.572892 | 0.404373  |
| 1 | -7.737269 | 3.158308  | -1.057550 |
| 1 | -9.637061 | 1.818764  | -0.177720 |

**1a<sub>ph</sub>**

SCF Energy = -806.686724

Gibbs Free Energy = -806.475005

|   |           |           |           |
|---|-----------|-----------|-----------|
| 6 | -6.832184 | -0.631796 | -0.000815 |
| 6 | -5.515374 | -1.082206 | -0.000742 |
| 6 | -4.451812 | -0.161593 | 0.000081  |
| 6 | -4.737954 | 1.216070  | 0.000821  |
| 6 | -6.057951 | 1.656517  | 0.000734  |
| 6 | -7.108365 | 0.736659  | -0.000079 |
| 1 | -7.645550 | -1.350917 | -0.001451 |
| 1 | -5.295593 | -2.144455 | -0.001318 |
| 1 | -3.917205 | 1.924983  | 0.001453  |
| 1 | -6.267778 | 2.721672  | 0.001307  |
| 1 | -8.136680 | 1.084440  | -0.000142 |
| 6 | -3.098533 | -0.614285 | 0.000183  |
| 6 | -1.944655 | -0.981058 | 0.000251  |
| 6 | -0.564278 | -1.446596 | 0.000314  |
| 1 | -0.382671 | -2.081995 | -0.884495 |
| 1 | -0.382609 | -2.081538 | 0.885442  |
| 8 | 0.318845  | -0.334491 | -0.000006 |
| 6 | 1.659334  | -0.739270 | 0.000112  |
| 1 | 1.898075  | -1.356390 | 0.885061  |
| 1 | 1.898066  | -1.356945 | -0.884459 |
| 6 | 2.565232  | 0.490203  | -0.000280 |
| 8 | 2.098233  | 1.613145  | -0.000694 |
| 6 | 4.043403  | 0.254401  | -0.000122 |
| 6 | 4.882734  | 1.377728  | -0.000381 |
| 6 | 4.613287  | -1.027031 | 0.000270  |
| 6 | 6.264559  | 1.224240  | -0.000246 |
| 1 | 4.420800  | 2.358718  | -0.000689 |
| 6 | 5.998408  | -1.179963 | 0.000403  |
| 1 | 3.985469  | -1.911695 | 0.000463  |
| 6 | 6.825055  | -0.055763 | 0.000147  |
| 1 | 6.907375  | 2.098968  | -0.000447 |
| 1 | 6.432210  | -2.174934 | 0.000705  |
| 1 | 7.904035  | -0.176682 | 0.000255  |

**1a'<sub>Bu</sub>**

SCF Energy = -732.890407

Gibbs Free Energy = -732.647208

|   |           |           |           |
|---|-----------|-----------|-----------|
| 6 | -3.739735 | -0.353647 | 0.000002  |
| 6 | -2.604545 | -0.768373 | 0.000016  |
| 6 | -1.243607 | -1.288934 | 0.000107  |
| 1 | -1.084637 | -1.929694 | -0.884831 |
| 1 | -1.084688 | -1.929530 | 0.885170  |
| 8 | -0.312958 | -0.213332 | 0.000046  |
| 6 | 1.007929  | -0.674942 | 0.000027  |
| 1 | 1.220798  | -1.302691 | 0.884485  |
| 1 | 1.220773  | -1.302682 | -0.884442 |
| 6 | 1.967905  | 0.512285  | 0.000025  |
| 8 | 1.553351  | 1.655717  | 0.000056  |
| 6 | 3.434515  | 0.210119  | -0.000005 |
| 6 | 4.323599  | 1.294434  | 0.000015  |
| 6 | 3.946299  | -1.095569 | -0.000041 |
| 6 | 5.697170  | 1.079026  | -0.000009 |
| 1 | 3.906114  | 2.295162  | 0.000046  |

|   |           |           |           |    |           |           |           |
|---|-----------|-----------|-----------|----|-----------|-----------|-----------|
| 6 | 5.323181  | -1.310663 | -0.000061 | 1  | 0.385344  | 5.752971  | 0.921594  |
| 1 | 3.279139  | -1.950927 | -0.000051 | 14 | 2.754702  | -0.511421 | -0.132921 |
| 6 | 6.199620  | -0.224848 | -0.000048 | 8  | 2.941870  | -2.123174 | -0.438929 |
| 1 | 6.378662  | 1.924004  | 0.000001  | 8  | 3.301474  | -0.191564 | 1.392717  |
| 1 | 5.711756  | -2.324176 | -0.000086 | 6  | 1.967900  | -2.955753 | -1.080539 |
| 1 | 7.272090  | -0.394152 | -0.000064 | 1  | 2.523390  | -3.765810 | -1.564917 |
| 6 | -5.113615 | 0.172060  | -0.000021 | 1  | 1.435723  | -2.396838 | -1.858048 |
| 6 | -5.852096 | -0.321380 | -1.262738 | 6  | 0.979272  | -3.518263 | -0.068797 |
| 1 | -6.875468 | 0.068483  | -1.274304 | 1  | 0.410065  | -2.708058 | 0.394614  |
| 1 | -5.342288 | 0.017776  | -2.168654 | 1  | 0.277620  | -4.202778 | -0.559101 |
| 1 | -5.899116 | -1.413901 | -1.285474 | 1  | 1.503301  | -4.070775 | 0.717034  |
| 6 | -5.852375 | -0.321971 | 1.262295  | 6  | 2.732600  | -0.813881 | 2.551954  |
| 1 | -5.342768 | 0.016757  | 2.168484  | 1  | 2.776291  | -0.074600 | 3.359488  |
| 1 | -6.875749 | 0.067886  | 1.273824  | 1  | 1.673313  | -1.041776 | 2.376369  |
| 1 | -5.899403 | -1.414502 | 1.284512  | 6  | 3.501463  | -2.070150 | 2.930488  |
| 6 | -5.056355 | 1.715306  | 0.000326  | 1  | 3.080282  | -2.518824 | 3.836832  |
| 1 | -4.531968 | 2.084956  | 0.885493  | 1  | 3.456119  | -2.800043 | 2.118842  |
| 1 | -4.531801 | 2.085339  | -0.884581 | 1  | 4.552023  | -1.829926 | 3.117807  |
| 1 | -6.071931 | 2.125393  | 0.000321  | 6  | 3.761707  | 0.560154  | -1.273086 |
|   |           |           |           | 1  | 4.815412  | 0.492960  | -0.986379 |
|   |           |           |           | 1  | 3.678418  | 0.236384  | -2.314325 |
|   |           |           |           | 1  | 3.458483  | 1.608931  | -1.204930 |
|   |           |           |           | 1  | -1.776266 | 1.035442  | 0.908040  |

**3a<sub>phOSi</sub>**  
 SCF Energy = -1445.864474  
 Gibbs Free Energy = -1445.464660

|   |           |           |           |    |           |           |           |
|---|-----------|-----------|-----------|----|-----------|-----------|-----------|
| 6 | -5.111605 | -2.001268 | 0.074965  |    |           |           |           |
| 6 | -3.822151 | -1.530054 | -0.159166 |    |           |           |           |
| 6 | -3.375649 | -0.330702 | 0.426264  |    |           |           |           |
| 6 | -4.265438 | 0.360867  | 1.269708  |    |           |           |           |
| 6 | -5.554149 | -0.108535 | 1.501139  | 14 | 0.115416  | 0.779309  | 0.635555  |
| 6 | -5.985367 | -1.292473 | 0.900251  | 1  | -0.101704 | 1.582664  | 1.864002  |
| 1 | -5.432660 | -2.931404 | -0.384161 | 8  | -1.138961 | -0.276499 | 0.361928  |
| 1 | -3.154935 | -2.117077 | -0.776719 | 8  | 1.447456  | -0.139594 | 0.960129  |
| 1 | -3.932750 | 1.282302  | 1.739404  | 6  | -2.391868 | 0.089136  | -0.207362 |
| 1 | -6.222113 | 0.447190  | 2.152185  | 1  | -2.240374 | 0.587615  | -1.175627 |
| 1 | -6.989473 | -1.663545 | 1.080226  | 1  | -2.912484 | 0.801544  | 0.449406  |
| 6 | -2.044955 | 0.242759  | 0.213046  | 6  | -3.232706 | -1.162492 | -0.389156 |
| 6 | -1.143463 | -0.042420 | -0.735519 | 1  | -3.396564 | -1.653329 | 0.574105  |
| 6 | -1.228745 | -1.007437 | -1.893826 | 1  | -4.205408 | -0.913903 | -0.825717 |
| 1 | -2.163055 | -0.867461 | -2.458783 | 1  | -2.723207 | -1.869081 | -1.050706 |
| 1 | -1.173040 | -2.057477 | -1.584835 | 6  | 1.894898  | -1.222949 | 0.142777  |
| 8 | -0.092163 | -0.749627 | -2.725874 | 1  | 2.317028  | -1.974915 | 0.818255  |
| 6 | 0.433666  | 0.521714  | -2.368298 | 1  | 1.044622  | -1.687972 | -0.371867 |
| 1 | 1.482672  | 0.556971  | -2.661160 | 6  | 2.948317  | -0.764715 | -0.856195 |
| 1 | -0.102739 | 1.331744  | -2.882221 | 1  | 3.337093  | -1.618431 | -1.421715 |
| 6 | 0.222510  | 0.635627  | -0.844839 | 1  | 2.532139  | -0.045122 | -1.567568 |
| 8 | 1.120543  | -0.222668 | -0.152522 | 1  | 3.782014  | -0.285181 | -0.335460 |
| 6 | 0.274551  | 2.063413  | -0.330225 | 6  | 0.335915  | 1.904599  | -0.849173 |
| 6 | -0.588311 | 3.030047  | -0.868667 | 1  | 0.442505  | 1.331901  | -1.776561 |
| 6 | 1.160548  | 2.444471  | 0.681094  | 1  | -0.518735 | 2.579282  | -0.970728 |
| 6 | -0.548250 | 4.348482  | -0.424274 | 1  | 1.231957  | 2.521871  | -0.729390 |
| 1 | -1.311009 | 2.744034  | -1.626137 |    |           |           |           |
| 6 | 1.200874  | 3.767938  | 1.125900  |    |           |           |           |
| 1 | 1.817490  | 1.710882  | 1.130268  |    |           |           |           |
| 6 | 0.352612  | 4.724924  | 0.574260  |    |           |           |           |
| 1 | -1.223999 | 5.081403  | -0.854554 |    |           |           |           |
| 1 | 1.898758  | 4.044565  | 1.910333  | 8  | 0.654910  | 0.353157  | -0.384150 |

**4 (EtO)<sub>2</sub>MeSiH**  
 SCF Energy = -639.040385  
 Gibbs Free Energy = -638.892058

**5 (EtO)<sub>2</sub>MeSiOTs**  
 SCF Energy = -1533.326285  
 Gibbs Free Energy = -1533.068185

|    |           |           |           |    |           |           |           |
|----|-----------|-----------|-----------|----|-----------|-----------|-----------|
| 16 | -0.378625 | 1.541070  | -0.020186 | 6  | -5.192137 | -1.391476 | 2.130500  |
| 8  | -0.345758 | 2.535298  | -1.088652 | 1  | -4.412031 | 0.345998  | 1.131078  |
| 8  | -0.135906 | 1.947363  | 1.368078  | 6  | -4.894882 | -2.521651 | 2.896781  |
| 6  | -1.900140 | 0.628226  | -0.104575 | 1  | -3.331897 | -3.651003 | 3.862164  |
| 6  | -2.555964 | 0.510091  | -1.328895 | 1  | -6.219523 | -1.178068 | 1.848396  |
| 6  | -2.401869 | 0.033068  | 1.051723  | 1  | -5.688279 | -3.191730 | 3.214648  |
| 6  | -3.732728 | -0.229990 | -1.389564 | 8  | -1.833781 | 3.517525  | 0.192330  |
| 1  | -2.149093 | 0.996135  | -2.208092 | 1  | -0.398128 | 2.550559  | -0.969557 |
| 6  | -3.580102 | -0.703184 | 0.969805  | 1  | -1.447910 | 3.733417  | -1.756300 |
| 1  | -1.878350 | 0.156615  | 1.992257  | 8  | -1.702792 | 1.033752  | -2.406486 |
| 6  | -4.261209 | -0.846003 | -0.246607 | 6  | -3.704538 | 1.598992  | -1.292209 |
| 1  | -4.252029 | -0.330151 | -2.338155 | 6  | -4.482920 | 2.597656  | -0.686595 |
| 1  | -3.980317 | -1.171781 | 1.864086  | 6  | -4.309427 | 0.388791  | -1.667650 |
| 14 | 2.352673  | 0.350560  | -0.096851 | 6  | -5.840698 | 2.379101  | -0.455078 |
| 8  | 3.023018  | -0.360978 | -1.407436 | 1  | -4.017277 | 3.531518  | -0.396028 |
| 8  | 2.584919  | -0.611634 | 1.216332  | 6  | -5.660891 | 0.170276  | -1.425645 |
| 6  | 2.692929  | -1.682803 | -1.858063 | 1  | -3.697643 | -0.372950 | -2.135941 |
| 1  | 2.801667  | -1.673464 | -2.947208 | 6  | -6.430200 | 1.166400  | -0.817496 |
| 1  | 1.641560  | -1.905218 | -1.635339 | 1  | -6.438146 | 3.155447  | 0.013049  |
| 6  | 3.609510  | -2.720491 | -1.229992 | 1  | -6.114582 | -0.776572 | -1.701280 |
| 1  | 3.490017  | -2.725496 | -0.143924 | 1  | -7.485599 | 0.996816  | -0.625328 |
| 1  | 3.376600  | -3.718137 | -1.617763 | 6  | 3.169884  | 0.268521  | 1.390047  |
| 1  | 4.654157  | -2.493835 | -1.461423 | 6  | 3.134254  | -1.102393 | 1.746721  |
| 6  | 1.721182  | -0.694237 | 2.359683  | 6  | 4.142355  | -1.643809 | 2.553258  |
| 1  | 2.367699  | -0.863876 | 3.226637  | 6  | 5.164999  | -0.835109 | 3.046074  |
| 1  | 1.193432  | 0.253136  | 2.512874  | 6  | 5.190623  | 0.519420  | 2.720729  |
| 6  | 0.730343  | -1.836956 | 2.198003  | 6  | 4.205669  | 1.060596  | 1.890270  |
| 1  | 0.108484  | -1.932529 | 3.094893  | 1  | 4.109528  | -2.699922 | 2.795587  |
| 1  | 0.076138  | -1.660610 | 1.340333  | 1  | 5.934609  | -1.263008 | 3.680487  |
| 1  | 1.258551  | -2.782260 | 2.042197  | 1  | 5.982580  | 1.157578  | 3.101127  |
| 6  | 2.985018  | 2.079214  | 0.068218  | 1  | 4.248925  | 2.109345  | 1.618491  |
| 1  | 4.077204  | 2.078981  | 0.119847  | 15 | 1.877624  | 0.933436  | 0.248502  |
| 1  | 2.671812  | 2.682627  | -0.787967 | 6  | 2.437565  | 0.230123  | -1.356289 |
| 1  | 2.587646  | 2.544940  | 0.973743  | 6  | 1.500074  | 0.165751  | -2.397596 |
| 6  | -5.553905 | -1.617848 | -0.318504 | 6  | 3.730050  | -0.274407 | -1.560231 |
| 1  | -5.597031 | -2.397164 | 0.446976  | 6  | 1.858553  | -0.388563 | -3.625248 |
| 1  | -6.411996 | -0.953842 | -0.159327 | 1  | 0.488256  | 0.530934  | -2.252442 |
| 1  | -5.683417 | -2.089204 | -1.296530 | 6  | 4.079746  | -0.836544 | -2.788558 |
|    |           |           |           | 1  | 4.461158  | -0.235835 | -0.759599 |
|    |           |           |           | 6  | 3.143935  | -0.894819 | -3.822347 |
|    |           |           |           | 1  | 1.120139  | -0.445153 | -4.417725 |
|    |           |           |           | 1  | 5.081595  | -1.229963 | -2.935431 |
|    |           |           |           | 1  | 3.414371  | -1.339078 | -4.775924 |
| 28 | -0.007321 | 0.146795  | 0.973687  | 6  | 2.268955  | 2.716458  | 0.120151  |
| 6  | -1.989649 | 2.664757  | 1.348466  | 6  | 3.236578  | 3.227576  | -0.756384 |
| 6  | -1.425285 | 2.921854  | -1.017254 | 6  | 1.533013  | 3.597790  | 0.924843  |
| 6  | -2.256598 | 1.776181  | -1.601220 | 6  | 3.468183  | 4.601336  | -0.818455 |
| 6  | -1.452222 | 1.285799  | 1.246642  | 1  | 3.797134  | 2.551007  | -1.393390 |
| 1  | -1.493931 | 3.195866  | 2.171090  | 6  | 1.768679  | 4.970337  | 0.862937  |
| 1  | -3.063208 | 2.629943  | 1.582512  | 1  | 0.768636  | 3.196874  | 1.581614  |
| 6  | -1.773045 | 0.072860  | 1.589535  | 6  | 2.735910  | 5.473172  | -0.009056 |
| 6  | -2.834620 | -0.789823 | 2.059611  | 1  | 4.215838  | 4.992252  | -1.502366 |
| 6  | -2.550509 | -1.929160 | 2.836522  | 1  | 1.186676  | 5.645830  | 1.482248  |
| 6  | -4.177717 | -0.529776 | 1.722992  | 1  | 2.913248  | 6.543143  | -0.065224 |
| 6  | -3.569654 | -2.781204 | 3.255752  | 6  | 2.056993  | -1.992096 | 1.284330  |
| 1  | -1.518145 | -2.116936 | 3.117159  | 8  | 2.368040  | -3.305883 | 1.170570  |

**Cat1**

SCF Energy = -2529.466104

Gibbs Free Energy = -2528.851302

|                                  |           |           |           |    |           |           |           |
|----------------------------------|-----------|-----------|-----------|----|-----------|-----------|-----------|
| 6                                | 0.127527  | -2.859229 | 0.537860  | 6  | 1.264141  | 2.604470  | -0.302862 |
| 6                                | 1.185718  | -3.995042 | 0.670668  | 8  | 2.356558  | 3.316144  | 0.013590  |
| 7                                | 0.847120  | -1.653091 | 0.998941  | 6  | 2.754617  | 1.030294  | 0.258192  |
| 6                                | 1.434933  | -4.570746 | -0.739973 | 6  | 3.293075  | 2.406779  | 0.684400  |
| 1                                | 2.497829  | -4.490389 | -0.990852 | 7  | 1.342477  | 1.320619  | -0.124499 |
| 1                                | 1.173976  | -5.634597 | -0.779765 | 6  | 4.699008  | 2.557494  | 0.105437  |
| 6                                | 0.554900  | -3.742473 | -1.650617 | 1  | 4.885591  | 3.582214  | -0.231001 |
| 6                                | 0.418303  | -3.833994 | -3.034925 | 1  | 5.436818  | 2.332181  | 0.885699  |
| 6                                | -0.194873 | -2.805825 | -0.935187 | 6  | 4.734444  | 1.527230  | -0.999443 |
| 6                                | -0.471135 | -2.974633 | -3.684561 | 6  | 5.702055  | 1.361042  | -1.986914 |
| 1                                | 0.995977  | -4.558506 | -3.602376 | 6  | 3.638032  | 0.658941  | -0.920722 |
| 6                                | -1.077904 | -1.941849 | -1.576973 | 6  | 5.556003  | 0.318159  | -2.904874 |
| 6                                | -1.210456 | -2.031481 | -2.963204 | 1  | 6.554702  | 2.032047  | -2.045243 |
| 1                                | -0.580753 | -3.032695 | -4.763785 | 6  | 3.484726  | -0.377280 | -1.839729 |
| 1                                | -1.623080 | -1.195182 | -1.010980 | 6  | 4.454450  | -0.539629 | -2.831233 |
| 1                                | -1.862525 | -1.334761 | -3.477966 | 1  | 6.300460  | 0.176490  | -3.682996 |
| 1                                | 0.934741  | -4.759559 | 1.407771  | 1  | 2.646257  | -1.056640 | -1.755372 |
| 1                                | -0.761717 | -2.989776 | 1.158555  | 1  | 4.354032  | -1.350048 | -3.546499 |
|                                  |           |           |           | 1  | 3.216113  | 2.620027  | 1.753061  |
|                                  |           |           |           | 1  | 2.744900  | 0.307192  | 1.067290  |
| <b>Cat</b>                       |           |           |           | 28 | 0.014417  | -0.104910 | -0.269115 |
| SCF Energy = -3512.429075        |           |           |           | 8  | 1.334824  | -1.561114 | -0.056562 |
| Gibbs Free Energy = -3511.819419 |           |           |           | 8  | -1.299127 | -1.335803 | -0.812111 |
| 6                                | -1.184991 | 2.943570  | -0.790598 | 16 | 1.847207  | -2.104893 | 1.307320  |
| 6                                | 0.149858  | 3.393580  | -0.848857 | 16 | -1.773545 | -2.518842 | 0.112027  |
| 6                                | 0.445378  | 4.628951  | -1.440946 | 8  | 1.760676  | -1.043942 | 2.344117  |
| 6                                | -0.569646 | 5.400025  | -2.002048 | 8  | 1.313623  | -3.426624 | 1.624407  |
| 6                                | -1.888333 | 4.949835  | -1.960522 | 8  | -1.681353 | -2.095192 | 1.521954  |
| 6                                | -2.193827 | 3.731441  | -1.351655 | 8  | -1.193864 | -3.787543 | -0.322635 |
| 1                                | 1.473663  | 4.968298  | -1.466153 | 6  | -3.518666 | -2.588155 | -0.294998 |
| 1                                | -0.328777 | 6.348823  | -2.470121 | 6  | -4.459068 | -2.128920 | 0.622929  |
| 1                                | -2.683665 | 5.547218  | -2.395030 | 6  | -3.916070 | -3.131325 | -1.516545 |
| 1                                | -3.221814 | 3.391866  | -1.306812 | 6  | -5.813048 | -2.205285 | 0.304818  |
| 15                               | -1.552068 | 1.374624  | 0.072825  | 1  | -4.120612 | -1.729212 | 1.571391  |
| 6                                | -3.290025 | 1.055125  | -0.335848 | 6  | -5.272641 | -3.191405 | -1.824381 |
| 6                                | -4.316351 | 1.504351  | 0.505257  | 1  | -3.168523 | -3.516017 | -2.201535 |
| 6                                | -3.600378 | 0.453938  | -1.564721 | 6  | -6.239521 | -2.726365 | -0.922331 |
| 6                                | -5.646329 | 1.370037  | 0.107877  | 1  | -6.550829 | -1.849111 | 1.018640  |
| 1                                | -4.075539 | 1.956547  | 1.461193  | 1  | -5.588964 | -3.615341 | -2.774005 |
| 6                                | -4.930275 | 0.328994  | -1.955517 | 6  | 3.585276  | -2.295773 | 0.899551  |
| 1                                | -2.805086 | 0.059951  | -2.185791 | 6  | 4.548811  | -1.510718 | 1.526206  |
| 6                                | -5.952126 | 0.789356  | -1.123020 | 6  | 3.939582  | -3.166934 | -0.131480 |
| 1                                | -6.441135 | 1.713336  | 0.762824  | 6  | 5.865128  | -1.545629 | 1.067538  |
| 1                                | -5.169836 | -0.155337 | -2.895714 | 1  | 4.255730  | -0.871700 | 2.351893  |
| 1                                | -6.988469 | 0.679821  | -1.427538 | 6  | 5.257006  | -3.195421 | -0.575503 |
| 6                                | -1.453513 | 1.804582  | 1.841391  | 1  | 3.180619  | -3.790200 | -0.591975 |
| 6                                | -1.103085 | 0.792785  | 2.749697  | 6  | 6.232051  | -2.363517 | -0.006456 |
| 6                                | -1.682829 | 3.113591  | 2.292679  | 1  | 6.616097  | -0.918789 | 1.541753  |
| 6                                | -0.989785 | 1.101228  | 4.105243  | 1  | 5.532623  | -3.855655 | -1.393566 |
| 1                                | -0.924189 | -0.222383 | 2.410203  | 6  | 7.627627  | -2.314565 | -0.573352 |
| 6                                | -1.571815 | 3.406995  | 3.650415  | 1  | 8.361573  | -2.026312 | 0.184865  |
| 1                                | -1.939255 | 3.897880  | 1.587523  | 1  | 7.927713  | -3.280019 | -0.991184 |
| 6                                | -1.223094 | 2.401100  | 4.555666  | 1  | 7.680272  | -1.574654 | -1.382043 |
| 1                                | -0.705718 | 0.318925  | 4.801229  | 6  | -7.704547 | -2.752327 | -1.278984 |
| 1                                | -1.750426 | 4.419421  | 3.999904  | 1  | -7.931514 | -3.552123 | -1.989541 |
| 1                                | -1.128092 | 2.634770  | 5.611967  | 1  | -8.330242 | -2.894942 | -0.393096 |

1 -8.011578 -1.806275 -1.744043

**H<sub>2</sub>O**

SCF Energy = -76.420311

Gibbs Free Energy = -76.416598

8 0.000000 0.000000 0.119188  
1 -0.000000 0.759272 -0.476753  
1 -0.000000 -0.759272 -0.476753

**H<sub>2</sub>**

SCF Energy = -1.17868

Gibbs Free Energy = -1.180004

1 0.000000 0.000000 0.371423  
1 0.000000 0.000000 -0.371423

**IM13**

SCF Energy = -1723.88752

Gibbs Free Energy = -1723.505090

6 0.905012 -0.438280 -1.393505  
6 -0.337735 -1.095152 -1.570654  
6 -0.639962 -1.666883 -2.820213  
6 0.246165 -1.572831 -3.887518  
6 1.455254 -0.899109 -3.725544  
6 1.773502 -0.342749 -2.487894  
1 -1.588447 -2.172304 -2.946533  
1 -0.014094 -2.015650 -4.843666  
1 2.150025 -0.807454 -4.554868  
1 2.716296 0.178413 -2.365098  
15 1.395537 0.239007 0.251322  
6 2.521682 1.612931 -0.195613  
6 3.898894 1.444373 -0.389694  
6 1.955677 2.887337 -0.341167  
6 4.695480 2.534383 -0.743248  
1 4.346896 0.464924 -0.255648  
6 2.752281 3.972367 -0.702191  
1 0.894776 3.021973 -0.150145  
6 4.123041 3.796947 -0.905039  
1 5.763093 2.397568 -0.888195  
1 2.306796 4.956499 -0.812165  
1 4.744924 4.644448 -1.177594  
6 2.524569 -1.056136 0.905286  
6 2.842975 -0.984262 2.271955  
6 3.068645 -2.087577 0.128655  
6 3.706173 -1.917916 2.841772  
1 2.400016 -0.199582 2.877242  
6 3.926220 -3.025554 0.706413  
1 2.823609 -2.163175 -0.924857  
6 4.249255 -2.940661 2.060840  
1 3.947092 -1.852288 3.898546  
1 4.340906 -3.822491 0.095985  
1 4.916277 -3.671791 2.507934  
6 -1.390158 -1.178683 -0.538903  
8 -2.424096 -1.999493 -0.856921

6 -2.851937 -0.814601 1.115772  
6 -3.363030 -1.996550 0.254237  
7 -1.498876 -0.537497 0.578799  
6 -4.773235 -1.644769 -0.238542  
1 -4.900314 -1.924312 -1.289112  
1 -5.521343 -2.204270 0.336885  
6 -4.883002 -0.157798 0.013497  
6 -5.877354 0.720152 -0.415097  
6 -3.824201 0.306074 0.801077  
6 -5.795254 2.064959 -0.047713  
1 -6.701855 0.366749 -1.028321  
6 -3.736317 1.647046 1.171311  
6 -4.733067 2.524169 0.739299  
1 -6.561465 2.760389 -0.377829  
1 -2.898615 1.985012 1.772462  
1 -4.681623 3.573318 1.014640  
1 -3.294210 -2.976947 0.732112  
1 -2.771081 -1.027472 2.181549  
28 -0.266979 0.580583 1.585796  
1 0.554204 1.399854 2.463758  
1 -1.182049 0.858225 2.719099

**IM14**

SCF Energy = -1722.66494

Gibbs Free Energy = -1722.296320

28 0.059198 0.365019 -2.040700  
6 1.287099 1.499994 0.432988  
6 0.109831 2.303027 0.491306  
6 0.099681 3.466358 1.278758  
6 1.232097 3.881920 1.972691  
6 2.391368 3.116021 1.902230  
6 2.405118 1.939073 1.150949  
1 -0.813470 4.047710 1.330597  
1 1.204036 4.794435 2.559849  
1 3.286501 3.422565 2.435509  
1 3.311601 1.347486 1.125953  
15 1.377157 -0.095868 -0.565737  
6 0.572842 -1.322140 0.558726  
6 -0.332138 -0.949579 1.561268  
6 0.768742 -2.689462 0.302464  
6 -1.021894 -1.918831 2.290513  
1 -0.504495 0.098424 1.777314  
6 0.090388 -3.655934 1.041123  
1 1.461835 -2.993323 -0.476780  
6 -0.811526 -3.273139 2.037151  
1 -1.729108 -1.611014 3.054751  
1 0.260855 -4.708970 0.835211  
1 -1.349796 -4.025749 2.605549  
6 3.166085 -0.535747 -0.389148  
6 4.018282 -0.191269 -1.446965  
6 3.701247 -1.198170 0.726116  
6 5.379902 -0.486822 -1.388445  
1 3.598317 0.302853 -2.319555  
6 5.060368 -1.508041 0.778492  
1 3.051904 -1.472464 1.551215



|   |           |           |           |    |           |           |           |
|---|-----------|-----------|-----------|----|-----------|-----------|-----------|
| 6 | 5.902727  | -1.149963 | -0.276406 | 1  | 2.034792  | -0.324349 | 1.730962  |
| 1 | 6.030056  | -0.211201 | -2.213774 | 6  | 2.477119  | -2.418588 | 1.929616  |
| 1 | 5.463046  | -2.026307 | 1.644265  | 8  | 1.986113  | -3.336956 | 2.575574  |
| 1 | 6.960642  | -1.392094 | -0.234082 | 6  | 3.046353  | -2.665281 | 0.568157  |
| 6 | -1.159539 | 1.980764  | -0.188226 | 6  | 3.470949  | -1.630094 | -0.276677 |
| 8 | -2.285093 | 2.376766  | 0.474712  | 6  | 3.146420  | -3.996996 | 0.134089  |
| 6 | -2.808874 | 1.105833  | -1.419439 | 6  | 3.999546  | -1.931441 | -1.532408 |
| 6 | -3.432755 | 2.040182  | -0.350952 | 1  | 3.379188  | -0.594366 | 0.021393  |
| 7 | -1.351180 | 1.357615  | -1.312456 | 6  | 3.662824  | -4.292626 | -1.122223 |
| 6 | -4.436911 | 1.209211  | 0.459571  | 1  | 2.814115  | -4.778499 | 0.809337  |
| 1 | -4.387687 | 1.465732  | 1.522154  | 6  | 4.094758  | -3.256774 | -1.957284 |
| 1 | -5.459033 | 1.421827  | 0.120803  | 1  | 4.323521  | -1.120767 | -2.174816 |
| 6 | -4.039039 | -0.219367 | 0.161588  | 1  | 3.738334  | -5.324791 | -1.451103 |
| 6 | -4.433284 | -1.386669 | 0.813759  | 1  | 4.504629  | -3.485194 | -2.937031 |
| 6 | -3.154369 | -0.282358 | -0.918764 | 1  | -2.089244 | 0.079878  | 1.371164  |
| 6 | -3.919774 | -2.609857 | 0.378818  | 6  | -0.369905 | 0.854021  | -2.121734 |
| 1 | -5.116812 | -1.345829 | 1.657416  | 6  | 0.327949  | -0.375085 | -2.150981 |
| 6 | -2.634633 | -1.500340 | -1.351696 | 6  | 1.310046  | -0.602452 | -3.120485 |
| 6 | -3.023414 | -2.666918 | -0.693537 | 6  | 1.643475  | 0.395761  | -4.033791 |
| 1 | -4.204920 | -3.524962 | 0.889064  | 6  | 0.978014  | 1.619140  | -3.991302 |
| 1 | -1.909185 | -1.532392 | -2.160384 | 6  | -0.027358 | 1.840481  | -3.046526 |
| 1 | -2.607901 | -3.621448 | -0.998792 | 1  | 1.815047  | -1.559750 | -3.136700 |
| 1 | -3.843157 | 2.975847  | -0.740532 | 1  | 2.416815  | 0.215374  | -4.773870 |
| 1 | -3.144877 | 1.302286  | -2.440213 | 1  | 1.230487  | 2.404899  | -4.696690 |
|   |           |           |           | 1  | -0.546324 | 2.790502  | -3.029911 |
|   |           |           |           | 15 | -1.703564 | 1.101544  | -0.875351 |
|   |           |           |           | 6  | -2.968927 | -0.115417 | -1.426136 |
|   |           |           |           | 6  | -2.958044 | -0.677860 | -2.709300 |
|   |           |           |           | 6  | -4.002667 | -0.456948 | -0.542714 |
|   |           |           |           | 6  | -3.953397 | -1.578202 | -3.093832 |
|   |           |           |           | 1  | -2.174023 | -0.414884 | -3.410177 |
|   |           |           |           | 6  | -5.008310 | -1.335685 | -0.936302 |
|   |           |           |           | 1  | -4.010829 | -0.042427 | 0.459362  |
|   |           |           |           | 6  | -4.981100 | -1.906230 | -2.209813 |
|   |           |           |           | 1  | -3.928557 | -2.013314 | -4.088636 |
|   |           |           |           | 1  | -5.794477 | -1.597763 | -0.237405 |
|   |           |           |           | 1  | -5.755602 | -2.605879 | -2.509133 |
|   |           |           |           | 6  | -2.477177 | 2.708022  | -1.305991 |
|   |           |           |           | 6  | -1.776308 | 3.896210  | -1.037673 |
|   |           |           |           | 6  | -3.766123 | 2.777903  | -1.856021 |
|   |           |           |           | 6  | -2.358992 | 5.128582  | -1.329232 |
|   |           |           |           | 1  | -0.776166 | 3.850181  | -0.619723 |
|   |           |           |           | 6  | -4.345369 | 4.016655  | -2.131767 |
|   |           |           |           | 1  | -4.318606 | 1.870848  | -2.069642 |
|   |           |           |           | 6  | -3.644077 | 5.193954  | -1.870827 |
|   |           |           |           | 1  | -1.805226 | 6.039603  | -1.123376 |
|   |           |           |           | 1  | -5.344649 | 4.058192  | -2.555068 |
|   |           |           |           | 1  | -4.096870 | 6.157004  | -2.087753 |
|   |           |           |           | 6  | 0.016793  | -1.466615 | -1.211792 |
|   |           |           |           | 8  | 0.168127  | -2.717972 | -1.704244 |
|   |           |           |           | 6  | -0.632820 | -2.721584 | 0.524189  |
|   |           |           |           | 6  | -0.340844 | -3.637479 | -0.700332 |
|   |           |           |           | 7  | -0.399947 | -1.359382 | 0.000265  |
|   |           |           |           | 6  | -1.684845 | -4.263851 | -1.136238 |
|   |           |           |           | 1  | -2.001632 | -3.823897 | -2.088649 |
|   |           |           |           | 1  | -1.601637 | -5.344996 | -1.287009 |

### IM1B

SCF Energy = -3351.108032

Gibbs Free Energy = -3350.332484

|    |           |           |           |   |           |           |           |
|----|-----------|-----------|-----------|---|-----------|-----------|-----------|
| 28 | -0.756373 | 0.426545  | 1.073809  | 6 | -3.953397 | -1.578202 | -3.093832 |
| 8  | 1.856161  | 2.793776  | 2.067661  | 1 | -2.174023 | -0.414884 | -3.410177 |
| 16 | 1.745785  | 2.381160  | 0.656754  | 6 | -5.008310 | -1.335685 | -0.936302 |
| 8  | 1.157987  | 3.368622  | -0.276564 | 1 | -4.010829 | -0.042427 | 0.459362  |
| 8  | 1.105299  | 1.001974  | 0.484068  | 6 | -4.981100 | -1.906230 | -2.209813 |
| 6  | 3.399698  | 2.027847  | 0.068297  | 1 | -3.928557 | -2.013314 | -4.088636 |
| 6  | 3.618521  | 1.902749  | -1.303790 | 1 | -5.794477 | -1.597763 | -0.237405 |
| 6  | 4.420391  | 1.775710  | 0.981914  | 1 | -5.755602 | -2.605879 | -2.509133 |
| 6  | 4.870621  | 1.498090  | -1.756878 | 6 | -2.477177 | 2.708022  | -1.305991 |
| 1  | 2.813967  | 2.118210  | -1.996487 | 6 | -1.776308 | 3.896210  | -1.037673 |
| 6  | 5.667241  | 1.361734  | 0.512431  | 6 | -3.766123 | 2.777903  | -1.856021 |
| 1  | 4.224800  | 1.902964  | 2.040966  | 6 | -2.358992 | 5.128582  | -1.329232 |
| 6  | 5.906483  | 1.201793  | -0.857981 | 1 | -0.776166 | 3.850181  | -0.619723 |
| 1  | 5.047702  | 1.401912  | -2.825449 | 6 | -4.345369 | 4.016655  | -2.131767 |
| 1  | 6.465228  | 1.155261  | 1.220525  | 1 | -4.318606 | 1.870848  | -2.069642 |
| 6  | 7.230820  | 0.682724  | -1.357902 | 6 | -3.644077 | 5.193954  | -1.870827 |
| 1  | 7.189014  | -0.404697 | -1.499672 | 1 | -1.805226 | 6.039603  | -1.123376 |
| 1  | 8.037060  | 0.889320  | -0.648858 | 1 | -5.344649 | 4.058192  | -2.555068 |
| 1  | 7.499299  | 1.127542  | -2.320806 | 1 | -4.096870 | 6.157004  | -2.087753 |
| 6  | -0.802802 | 1.230081  | 2.880285  | 6 | 0.016793  | -1.466615 | -1.211792 |
| 6  | -0.230175 | 0.121016  | 2.990654  | 8 | 0.168127  | -2.717972 | -1.704244 |
| 6  | 0.467981  | -0.970710 | 3.717477  | 6 | -0.632820 | -2.721584 | 0.524189  |
| 1  | 0.175524  | -0.918035 | 4.771526  | 6 | -0.340844 | -3.637479 | -0.700332 |
| 1  | 0.161914  | -1.951693 | 3.339409  | 7 | -0.399947 | -1.359382 | 0.000265  |
| 8  | 1.887123  | -0.865141 | 3.730528  | 6 | -1.684845 | -4.263851 | -1.136238 |
| 6  | 2.494862  | -0.995930 | 2.466440  | 1 | -2.001632 | -3.823897 | -2.088649 |
| 1  | 3.537773  | -0.676810 | 2.577804  | 1 | -1.601637 | -5.344996 | -1.287009 |

|   |           |           |           |    |           |           |           |
|---|-----------|-----------|-----------|----|-----------|-----------|-----------|
| 6 | -2.641892 | -3.905749 | -0.021170 | 6  | 2.401956  | 0.309127  | 4.078616  |
| 6 | -3.947695 | -4.353528 | 0.168565  | 1  | 1.416330  | 1.332670  | 2.456916  |
| 6 | -2.064617 | -3.019315 | 0.892009  | 6  | 3.918832  | -1.461973 | 3.438686  |
| 6 | -4.667422 | -3.897429 | 1.275298  | 1  | 4.124315  | -1.810884 | 1.323595  |
| 1 | -4.401764 | -5.047567 | -0.533057 | 6  | 3.297094  | -0.703121 | 4.431844  |
| 6 | -2.777771 | -2.559437 | 1.996981  | 1  | 1.910535  | 0.896287  | 4.848519  |
| 6 | -4.089380 | -3.001729 | 2.181130  | 1  | 4.610113  | -2.253793 | 3.711382  |
| 1 | -5.684460 | -4.243525 | 1.435437  | 1  | 3.504609  | -0.904084 | 5.478484  |
| 1 | -2.320959 | -1.869227 | 2.698098  | 6  | 0.603633  | -2.350127 | 0.331976  |
| 1 | -4.659209 | -2.657921 | 3.039135  | 8  | 0.254897  | -3.402752 | 1.096647  |
| 1 | 0.442911  | -4.372200 | -0.521466 | 6  | -0.866630 | -1.414919 | 1.751161  |
| 1 | 0.043281  | -2.896889 | 1.360164  | 6  | -0.865699 | -2.956842 | 1.919961  |
| 6 | -1.414221 | 2.480269  | 3.412068  | 7  | -0.027622 | -1.245855 | 0.535947  |
| 6 | -0.504727 | 2.972832  | 4.558075  | 6  | -2.236443 | -3.444514 | 1.406345  |
| 1 | -0.925565 | 3.882308  | 5.001257  | 1  | -2.153542 | -3.738549 | 0.352936  |
| 1 | -0.418708 | 2.214989  | 5.343185  | 1  | -2.610000 | -4.306470 | 1.966457  |
| 1 | 0.492218  | 3.190345  | 4.169794  | 6  | -3.103511 | -2.210607 | 1.534695  |
| 6 | -1.531349 | 3.568185  | 2.335638  | 6  | -4.492072 | -2.116210 | 1.512322  |
| 1 | -2.189036 | 3.243911  | 1.527186  | 6  | -2.323799 | -1.055790 | 1.656151  |
| 1 | -1.953795 | 4.478004  | 2.775714  | 6  | -5.081936 | -0.851304 | 1.587128  |
| 1 | -0.553105 | 3.805500  | 1.915472  | 1  | -5.106975 | -3.006761 | 1.421868  |
| 6 | -2.818504 | 2.124102  | 3.943769  | 6  | -2.903174 | 0.207362  | 1.728596  |
| 1 | -3.448030 | 1.734329  | 3.137339  | 6  | -4.295455 | 0.302343  | 1.683908  |
| 1 | -2.760629 | 1.367782  | 4.732427  | 1  | -6.164408 | -0.763018 | 1.566738  |
| 1 | -3.300301 | 3.017901  | 4.354473  | 1  | -2.292901 | 1.099403  | 1.807067  |
|   |           |           |           | 1  | -4.760624 | 1.281577  | 1.730645  |
|   |           |           |           | 1  | -0.652481 | -3.288276 | 2.935958  |
|   |           |           |           | 1  | -0.355654 | -0.875009 | 2.556698  |
|   |           |           |           | 28 | 0.108353  | 0.397298  | -0.438916 |
|   |           |           |           | 6  | -2.018594 | -3.323784 | -2.539406 |
|   |           |           |           | 6  | -1.445355 | -2.108311 | -2.175101 |
|   |           |           |           | 6  | -2.230906 | -1.042441 | -1.693026 |
|   |           |           |           | 6  | -3.619720 | -1.242728 | -1.607991 |
|   |           |           |           | 6  | -4.195675 | -2.460175 | -1.966594 |
|   |           |           |           | 6  | -3.400264 | -3.510990 | -2.427623 |
|   |           |           |           | 1  | -1.388034 | -4.126207 | -2.914009 |
|   |           |           |           | 1  | -0.375421 | -1.959902 | -2.276263 |
|   |           |           |           | 1  | -4.238299 | -0.447708 | -1.207234 |
|   |           |           |           | 1  | -5.270133 | -2.592730 | -1.873465 |
|   |           |           |           | 1  | -3.849883 | -4.460702 | -2.702551 |
|   |           |           |           | 6  | -1.604152 | 0.216947  | -1.282164 |
|   |           |           |           | 6  | -2.068214 | 1.437403  | -1.581722 |
|   |           |           |           | 6  | -3.159471 | 1.958885  | -2.473385 |
|   |           |           |           | 1  | -4.149530 | 1.985704  | -1.998359 |
|   |           |           |           | 1  | -3.247802 | 1.366204  | -3.396182 |
|   |           |           |           | 8  | -2.790854 | 3.321133  | -2.768307 |
|   |           |           |           | 6  | -1.415276 | 3.517979  | -2.412601 |
|   |           |           |           | 1  | -0.739848 | 3.205527  | -3.222631 |
|   |           |           |           | 1  | -1.280035 | 4.583519  | -2.209995 |
|   |           |           |           | 6  | -1.160306 | 2.591956  | -1.201763 |
|   |           |           |           | 8  | 0.155662  | 2.111446  | -1.103902 |
|   |           |           |           | 6  | -1.615434 | 3.218690  | 0.124483  |
|   |           |           |           | 6  | -2.907272 | 3.739783  | 0.293066  |
|   |           |           |           | 6  | -0.753869 | 3.207992  | 1.227586  |
|   |           |           |           | 6  | -3.333887 | 4.194889  | 1.540918  |
|   |           |           |           | 1  | -3.573856 | 3.794926  | -0.560508 |

### IM1C

SCF Energy = -2529.482908

Gibbs Free Energy = -2528.864209

|    |          |           |           |   |           |           |           |
|----|----------|-----------|-----------|---|-----------|-----------|-----------|
| 6  | 2.603651 | -1.436628 | -0.849312 | 6 | -2.230906 | -1.042441 | -1.693026 |
| 6  | 1.720087 | -2.518598 | -0.607432 | 6 | -3.619720 | -1.242728 | -1.607991 |
| 6  | 1.917961 | -3.753125 | -1.229903 | 6 | -4.195675 | -2.460175 | -1.966594 |
| 6  | 2.970223 | -3.922287 | -2.129651 | 6 | -3.400264 | -3.510990 | -2.427623 |
| 6  | 3.832429 | -2.859137 | -2.389319 | 1 | -1.388034 | -4.126207 | -2.914009 |
| 6  | 3.655014 | -1.629223 | -1.747031 | 1 | -0.375421 | -1.959902 | -2.276263 |
| 1  | 1.233346 | -4.566000 | -1.013979 | 1 | -4.238299 | -0.447708 | -1.207234 |
| 1  | 3.111932 | -4.877624 | -2.624274 | 1 | -5.270133 | -2.592730 | -1.873465 |
| 1  | 4.652690 | -2.982738 | -3.089807 | 1 | -3.849883 | -4.460702 | -2.702551 |
| 1  | 4.341620 | -0.814107 | -1.945930 | 6 | -1.604152 | 0.216947  | -1.282164 |
| 15 | 2.304483 | 0.186144  | -0.005045 | 6 | -2.068214 | 1.437403  | -1.581722 |
| 6  | 3.599362 | 1.292448  | -0.643196 | 6 | -3.159471 | 1.958885  | -2.473385 |
| 6  | 4.935278 | 1.229739  | -0.218866 | 1 | -4.149530 | 1.985704  | -1.998359 |
| 6  | 3.208218 | 2.236468  | -1.606472 | 1 | -3.247802 | 1.366204  | -3.396182 |
| 6  | 5.880452 | 2.092789  | -0.769521 | 8 | -2.790854 | 3.321133  | -2.768307 |
| 1  | 5.230884 | 0.515033  | 0.542914  | 6 | -1.415276 | 3.517979  | -2.412601 |
| 6  | 4.164467 | 3.093798  | -2.153544 | 1 | -0.739848 | 3.205527  | -3.222631 |
| 1  | 2.159138 | 2.305149  | -1.885562 | 1 | -1.280035 | 4.583519  | -2.209995 |
| 6  | 5.495484 | 3.021481  | -1.740652 | 6 | -1.160306 | 2.591956  | -1.201763 |
| 1  | 6.914076 | 2.044974  | -0.439917 | 8 | 0.155662  | 2.111446  | -1.103902 |
| 1  | 3.864567 | 3.826750  | -2.896393 | 6 | -1.615434 | 3.218690  | 0.124483  |
| 1  | 6.233715 | 3.694558  | -2.166805 | 6 | -2.907272 | 3.739783  | 0.293066  |
| 6  | 2.757572 | -0.191892 | 1.730777  | 6 | -0.753869 | 3.207992  | 1.227586  |
| 6  | 2.128670 | 0.560904  | 2.734698  | 6 | -3.333887 | 4.194889  | 1.540918  |
| 6  | 3.650503 | -1.209089 | 2.092845  | 1 | -3.573856 | 3.794926  | -0.560508 |

|   |           |          |          |   |           |          |           |
|---|-----------|----------|----------|---|-----------|----------|-----------|
| 6 | -1.178354 | 3.666973 | 2.476259 | 1 | -1.222933 | 5.006894 | 1.887318  |
| 1 | 0.252026  | 2.833566 | 1.078040 | 6 | -2.319391 | 1.889437 | -0.192089 |
| 6 | -2.476866 | 4.149167 | 2.643595 | 6 | -3.049052 | 2.284855 | 0.930713  |
| 1 | -4.341087 | 4.587718 | 1.652738 | 1 | -3.229468 | 3.703399 | 2.542351  |
| 1 | -0.492055 | 3.649347 | 3.319577 | 1 | -2.639100 | 1.048215 | -0.792702 |
| 1 | -2.814049 | 4.497673 | 3.615491 | 1 | -3.937905 | 1.730119 | 1.211923  |

**IM1**

SCF Energy = -2617.417157

Gibbs Free Energy = -2616.927161

|    |          |           |           |   |           |           |           |
|----|----------|-----------|-----------|---|-----------|-----------|-----------|
| 6  | 3.185872 | -0.191365 | -0.459264 | 8 | -0.713261 | -2.194638 | -1.080552 |
| 6  | 3.175730 | 0.993333  | -1.230273 | 8 | -2.278054 | -2.699370 | -3.040721 |
| 6  | 4.369350 | 1.489502  | -1.764734 | 6 | -3.274203 | -1.536093 | -0.866907 |
| 6  | 5.564044 | 0.797064  | -1.566545 | 6 | -3.078068 | -1.617852 | 0.511808  |
| 6  | 5.573261 | -0.380581 | -0.821186 | 6 | -4.513178 | -1.185244 | -1.409516 |
| 6  | 4.388626 | -0.869502 | -0.261582 | 6 | -4.146813 | -1.332419 | 1.358478  |
| 1  | 4.353174 | 2.407317  | -2.340871 | 1 | -2.113266 | -1.913539 | 0.905983  |
| 1  | 6.484002 | 1.179015  | -1.995663 | 6 | -5.563207 | -0.896217 | -0.545087 |
| 1  | 6.501832 | -0.920175 | -0.666781 | 1 | -4.651632 | -1.141098 | -2.484388 |
| 1  | 4.401187 | -1.777660 | 0.330809  | 6 | -5.399209 | -0.964335 | 0.848074  |
| 15 | 1.631044 | -0.758449 | 0.307330  | 1 | -4.007553 | -1.401948 | 2.433153  |
| 6  | 1.344066 | 0.371413  | 1.700612  | 1 | -6.528904 | -0.618013 | -0.956047 |
| 6  | 2.399517 | 1.058972  | 2.316015  | 6 | -6.557172 | -0.677853 | 1.768066  |
| 6  | 0.026919 | 0.564722  | 2.143815  | 1 | -6.218937 | -0.457228 | 2.783407  |
| 6  | 2.134976 | 1.929778  | 3.373141  | 1 | -7.151332 | 0.167432  | 1.409344  |
| 1  | 3.418431 | 0.918801  | 1.970440  | 1 | -7.226956 | -1.543785 | 1.823759  |

**IM2B**

SCF Energy = -3351.105215

Gibbs Free Energy = -3350.330669

|   |           |           |           |    |           |           |           |
|---|-----------|-----------|-----------|----|-----------|-----------|-----------|
| 1 | -1.248537 | 1.589004  | 3.532004  | 28 | 1.003232  | 1.009262  | 0.299804  |
| 1 | 0.621876  | 2.796266  | 4.636413  | 8  | -2.172139 | 2.191033  | -1.745350 |
| 6 | 1.916198  | -2.421865 | 0.948107  | 16 | -1.448763 | 0.895374  | -1.747355 |
| 6 | 2.225011  | -2.630162 | 2.300771  | 8  | -0.465947 | 0.739952  | -2.842320 |
| 6 | 1.849959  | -3.508496 | 0.060397  | 8  | -0.887380 | 0.573403  | -0.366932 |
| 6 | 2.476355  | -3.922716 | 2.758253  | 8  | -0.887380 | 0.573403  | -0.366932 |
| 1 | 2.266902  | -1.790950 | 2.986815  | 6  | -2.662995 | -0.408184 | -1.954097 |
| 6 | 2.106379  | -4.794948 | 0.527993  | 6  | -3.218113 | -1.038532 | -0.842059 |
| 1 | 1.583156  | -3.350251 | -0.978733 | 6  | -3.072003 | -0.752979 | -3.241060 |
| 6 | 2.418811  | -5.001886 | 1.873966  | 6  | -4.198258 | -2.008238 | -1.022608 |
| 1 | 2.715253  | -4.086516 | 3.803984  | 1  | -2.877941 | -0.774927 | 0.149228  |
| 1 | 2.052382  | -5.635967 | -0.155282 | 6  | -4.054392 | -1.727555 | -3.408201 |
| 1 | 2.612139  | -6.006920 | 2.235061  | 1  | -2.609312 | -0.271752 | -4.095795 |
| 6 | 1.928895  | 1.734865  | -1.460495 | 6  | -4.637601 | -2.362229 | -2.303972 |
| 8 | 2.041231  | 3.040627  | -1.706895 | 1  | -4.634901 | -2.490084 | -0.152655 |
| 6 | -0.242128 | 2.370779  | -1.693081 | 1  | -4.373554 | -2.000515 | -4.410732 |
| 6 | 0.694077  | 3.612762  | -1.707522 | 6  | -5.732338 | -3.384563 | -2.481463 |
| 7 | 0.721459  | 1.260101  | -1.444884 | 1  | -6.712934 | -2.950948 | -2.249245 |
| 6 | 0.435439  | 4.399551  | -0.402212 | 1  | -5.772205 | -3.757710 | -3.508534 |
| 1 | 1.311262  | 4.324092  | 0.251846  | 1  | -5.594079 | -4.240407 | -1.812704 |
| 1 | 0.274149  | 5.463322  | -0.600293 | 6  | 0.751033  | 3.002713  | 0.299657  |
| 6 | -0.784604 | 3.736337  | 0.196499  | 6  | 0.327300  | 2.497376  | 1.370475  |
| 6 | -1.516847 | 4.133140  | 1.313579  | 6  | -0.479523 | 2.532735  | 2.617363  |
| 6 | -1.182523 | 2.616249  | -0.539178 | 1  | 0.112638  | 2.960549  | 3.433250  |
| 6 | -2.647526 | 3.397180  | 1.678345  | 1  | -0.786256 | 1.531093  | 2.923784  |

|    |           |           |           |    |           |           |           |
|----|-----------|-----------|-----------|----|-----------|-----------|-----------|
| 8  | -1.610956 | 3.391790  | 2.480070  | 6  | -1.789677 | -1.335782 | 4.107616  |
| 6  | -2.576567 | 2.933852  | 1.556571  | 1  | -1.530213 | -0.406120 | 2.188173  |
| 1  | -3.219451 | 3.790208  | 1.324917  | 6  | 0.073130  | -2.666827 | 4.893246  |
| 1  | -2.121710 | 2.613182  | 0.610503  | 1  | 1.780138  | -2.777424 | 3.580340  |
| 6  | -3.444644 | 1.802564  | 2.098634  | 6  | -1.209365 | -2.149372 | 5.084222  |
| 8  | -3.222097 | 1.309584  | 3.197971  | 1  | -2.771662 | -0.898459 | 4.247721  |
| 6  | -4.565842 | 1.307107  | 1.244481  | 1  | 0.524546  | -3.297705 | 5.653363  |
| 6  | -4.770340 | 1.759143  | -0.067624 | 1  | -1.753255 | -2.372932 | 5.997190  |
| 6  | -5.424491 | 0.334581  | 1.781165  | 6  | 1.641984  | -1.024000 | -1.836852 |
| 6  | -5.816742 | 1.239286  | -0.828070 | 8  | 2.367396  | -1.403510 | -2.914476 |
| 1  | -4.085298 | 2.459988  | -0.527067 | 6  | 3.093903  | 0.664896  | -2.034086 |
| 6  | -6.470335 | -0.176680 | 1.021536  | 6  | 3.468662  | -0.467848 | -3.029650 |
| 1  | -5.247888 | -0.001329 | 2.797221  | 7  | 1.965293  | 0.088075  | -1.278222 |
| 6  | -6.666902 | 0.275912  | -0.287541 | 6  | 4.794714  | -1.089349 | -2.530215 |
| 1  | -5.948724 | 1.572179  | -1.852352 | 1  | 4.590855  | -2.069297 | -2.083188 |
| 1  | -7.131991 | -0.927927 | 1.442927  | 1  | 5.509711  | -1.245071 | -3.344289 |
| 1  | -7.477063 | -0.130700 | -0.886059 | 6  | 5.293983  | -0.108724 | -1.493026 |
| 1  | 2.243974  | 1.199669  | 0.926591  | 6  | 6.524661  | -0.097660 | -0.840298 |
| 6  | 0.922825  | 4.194079  | -0.588096 | 6  | 4.338327  | 0.871450  | -1.208188 |
| 6  | -0.458394 | 4.886723  | -0.660670 | 6  | 6.783590  | 0.900005  | 0.102834  |
| 1  | -0.373225 | 5.814373  | -1.238354 | 1  | 7.273119  | -0.854244 | -1.058142 |
| 1  | -0.816100 | 5.130482  | 0.343799  | 6  | 4.591532  | 1.868330  | -0.268855 |
| 1  | -1.183974 | 4.229939  | -1.144863 | 6  | 5.823014  | 1.875187  | 0.390169  |
| 6  | 1.384036  | 3.817737  | -2.003850 | 1  | 7.741128  | 0.920340  | 0.615183  |
| 1  | 2.423388  | 3.477078  | -1.988857 | 1  | 3.841712  | 2.620471  | -0.052225 |
| 1  | 1.336076  | 4.697167  | -2.654460 | 1  | 6.038899  | 2.647942  | 1.121786  |
| 1  | 0.756546  | 3.031552  | -2.430864 | 1  | 3.511001  | -0.147819 | -4.070579 |
| 6  | 1.947369  | 5.148156  | 0.060901  | 1  | 2.738591  | 1.574534  | -2.518429 |
| 1  | 2.927366  | 4.670622  | 0.161521  |    |           |           |           |
| 1  | 1.614574  | 5.458073  | 1.055472  |    |           |           |           |
| 1  | 2.069407  | 6.043380  | -0.559034 |    |           |           |           |
| 6  | 0.259066  | -2.151812 | -0.066560 |    |           |           |           |
| 6  | 0.594157  | -1.969984 | -1.425548 |    |           |           |           |
| 6  | -0.048849 | -2.718370 | -2.415629 | 28 | 0.118011  | 0.148962  | -0.771571 |
| 6  | -1.029491 | -3.645920 | -2.072322 | 6  | 0.288280  | -2.092383 | -2.703775 |
| 6  | -1.348299 | -3.845803 | -0.732374 | 6  | -1.983432 | -1.637990 | -3.140048 |
| 6  | -0.704430 | -3.106599 | 0.262599  | 6  | -2.135267 | -1.119141 | -1.674310 |
| 1  | 0.212216  | -2.547054 | -3.452835 | 6  | -1.127626 | -1.872400 | -0.736054 |
| 1  | -1.548757 | -4.196727 | -2.848963 | 8  | -0.907355 | -2.529426 | -3.346580 |
| 1  | -2.110950 | -4.566398 | -0.454865 | 1  | -1.871368 | -0.736180 | -3.766060 |
| 1  | -0.969018 | -3.261832 | 1.301795  | 1  | -2.878337 | -2.180101 | -3.454764 |
| 15 | 1.056767  | -1.087949 | 1.205388  | 8  | -1.653328 | 0.206916  | -1.562071 |
| 6  | 2.745664  | -1.787029 | 1.327731  | 6  | -3.591280 | -1.207557 | -1.247876 |
| 6  | 3.063854  | -3.060707 | 0.836649  | 6  | -4.181035 | -2.452434 | -0.991977 |
| 6  | 3.758438  | -0.998881 | 1.893218  | 6  | -4.380337 | -0.058987 | -1.149203 |
| 6  | 4.376043  | -3.532189 | 0.902159  | 6  | -5.518294 | -2.543362 | -0.613849 |
| 1  | 2.289072  | -3.678534 | 0.395682  | 1  | -3.581275 | -3.353439 | -1.078308 |
| 6  | 5.063577  | -1.478015 | 1.972160  | 6  | -5.721745 | -0.146196 | -0.770631 |
| 1  | 3.526308  | -0.000269 | 2.247583  | 1  | -3.928357 | 0.899243  | -1.370744 |
| 6  | 5.376494  | -2.742338 | 1.469896  | 6  | -6.294463 | -1.387327 | -0.495157 |
| 1  | 4.613748  | -4.517522 | 0.512118  | 1  | -5.954818 | -3.516184 | -0.405665 |
| 1  | 5.840111  | -0.851475 | 2.396702  | 1  | -6.318813 | 0.758660  | -0.694254 |
| 1  | 6.398044  | -3.107701 | 1.515540  | 1  | -7.336116 | -1.456936 | -0.195069 |
| 6  | 0.206907  | -1.558575 | 2.746654  | 6  | 3.049309  | 1.060180  | 0.433783  |
| 6  | -1.083585 | -1.042357 | 2.944037  | 6  | 2.671437  | 2.387264  | 0.127722  |
| 6  | 0.783487  | -2.374827 | 3.727425  | 6  | 3.566878  | 3.441621  | 0.399623  |

**IM2C**

SCF Energy = -2529.420251

Gibbs Free Energy = -2528.801607



|   |           |           |           |   |           |           |           |
|---|-----------|-----------|-----------|---|-----------|-----------|-----------|
| 6 | 4.559970  | -1.143750 | -0.730430 | 1 | 0.769318  | -5.527286 | -3.294987 |
| 6 | 3.043215  | -0.290145 | 0.947870  | 1 | 3.106897  | -4.680311 | -3.215889 |
| 6 | 4.118308  | -2.434611 | -0.433898 | 1 | -0.518252 | 1.078223  | 2.385685  |
| 1 | 5.318753  | -0.984146 | -1.490587 | 6 | 0.611851  | 0.727148  | -1.689026 |
| 6 | 2.598627  | -1.576230 | 1.246881  | 6 | 0.208003  | -0.580472 | -2.038021 |
| 6 | 3.143791  | -2.651793 | 0.546637  | 6 | 0.996111  | -1.355866 | -2.889862 |
| 1 | 4.536076  | -3.280732 | -0.970106 | 6 | 2.211417  | -0.859462 | -3.359156 |
| 1 | 1.837851  | -1.746364 | 2.005608  | 6 | 2.618213  | 0.425039  | -3.010953 |
| 1 | 2.806985  | -3.660482 | 0.759203  | 6 | 1.810968  | 1.221351  | -2.193880 |
| 1 | 3.609821  | 2.979438  | 1.220911  | 1 | 0.674610  | -2.358151 | -3.142446 |
| 1 | 2.751467  | 1.116839  | 2.609026  | 1 | 2.840318  | -1.485140 | -3.983619 |
| 1 | -1.247840 | -0.680089 | 2.703344  | 1 | 3.573031  | 0.809542  | -3.351850 |

### IM3B

SCF Energy = -3351.12764

Gibbs Free Energy = -3350.349715

|    |           |           |           |    |           |           |           |
|----|-----------|-----------|-----------|----|-----------|-----------|-----------|
| 28 | -0.959004 | 0.172401  | 1.031205  | 15 | -0.432387 | 1.684286  | -0.527632 |
| 8  | 3.083117  | -1.452560 | 2.279924  | 6  | -1.874189 | 2.158787  | -1.554797 |
| 16 | 2.685536  | -0.166605 | 1.656942  | 6  | -1.898658 | 2.008807  | -2.947233 |
| 8  | 2.585673  | 0.993726  | 2.583413  | 6  | -3.008108 | 2.658604  | -0.897805 |
| 8  | 1.462781  | -0.312491 | 0.792596  | 6  | -3.042269 | 2.354575  | -3.670538 |
| 6  | 3.994289  | 0.243316  | 0.489588  | 1  | -1.028616 | 1.619169  | -3.464490 |
| 6  | 4.205751  | 1.565547  | 0.103497  | 6  | -4.139436 | 3.020222  | -1.623159 |
| 6  | 4.743288  | -0.781044 | -0.087550 | 1  | -3.007475 | 2.744969  | 0.184454  |
| 6  | 5.149836  | 1.855617  | -0.880251 | 6  | -4.160601 | 2.863429  | -3.010794 |
| 1  | 3.638268  | 2.358766  | 0.573013  | 1  | -3.054142 | 2.230948  | -4.749459 |
| 6  | 5.679959  | -0.482241 | -1.074218 | 1  | -5.013710 | 3.396233  | -1.103635 |
| 1  | 4.598285  | -1.797084 | 0.259717  | 1  | -5.049768 | 3.130728  | -3.573720 |
| 6  | 5.895472  | 0.838831  | -1.490142 | 6  | 0.451674  | 3.245867  | -0.217916 |
| 1  | 5.312047  | 2.888844  | -1.177844 | 6  | 1.247155  | 3.342273  | 0.932335  |
| 1  | 6.261604  | -1.283867 | -1.523199 | 6  | 0.353752  | 4.337424  | -1.093842 |
| 6  | 6.934424  | 1.159071  | -2.536865 | 6  | 1.943096  | 4.522595  | 1.196865  |
| 1  | 7.005354  | 0.365113  | -3.286819 | 1  | 1.363630  | 2.493597  | 1.599388  |
| 1  | 7.928811  | 1.268158  | -2.086694 | 6  | 1.051344  | 5.513204  | -0.821726 |
| 1  | 6.707138  | 2.096548  | -3.053023 | 1  | -0.269193 | 4.267295  | -1.979679 |
| 6  | -0.841645 | 0.244723  | 3.132588  | 6  | 1.845932  | 5.607096  | 0.323812  |
| 6  | -1.327038 | -0.830865 | 2.562280  | 1  | 2.563078  | 4.584043  | 2.085952  |
| 6  | -1.764246 | -2.176495 | 3.043753  | 1  | 0.972403  | 6.356496  | -1.501299 |
| 1  | -2.201769 | -2.092515 | 4.044921  | 1  | 2.385717  | 6.525563  | 0.534691  |
| 1  | -2.525904 | -2.600996 | 2.383284  | 6  | -1.048362 | -1.145215 | -1.527738 |
| 8  | -0.687484 | -3.100621 | 3.194911  | 8  | -1.723754 | -1.952718 | -2.363868 |
| 6  | 0.251845  | -3.145220 | 2.140806  | 6  | -2.894687 | -1.635156 | -0.327630 |
| 1  | 1.089740  | -3.748517 | 2.503736  | 6  | -3.004532 | -2.265066 | -1.741706 |
| 1  | 0.667399  | -2.156009 | 1.914525  | 7  | -1.596157 | -0.929837 | -0.374580 |
| 6  | -0.280090 | -3.749039 | 0.853319  | 6  | -4.166632 | -1.556181 | -2.474374 |
| 8  | -1.460006 | -4.066587 | 0.729873  | 1  | -3.768414 | -0.959518 | -3.302746 |
| 6  | 0.684391  | -3.954158 | -0.270494 | 1  | -4.874033 | -2.274474 | -2.901330 |
| 6  | 2.001290  | -3.470721 | -0.230640 | 6  | -4.802237 | -0.682865 | -1.413975 |
| 6  | 0.244810  | -4.683899 | -1.386084 | 6  | -5.963306 | 0.081902  | -1.509427 |
| 6  | 2.861812  | -3.731013 | -1.297400 | 6  | -4.081876 | -0.714577 | -0.216879 |
| 1  | 2.353403  | -2.887562 | 0.613849  | 6  | -6.387493 | 0.812472  | -0.397010 |
| 6  | 1.111159  | -4.949407 | -2.441347 | 1  | -6.533279 | 0.110203  | -2.433708 |
| 1  | -0.777240 | -5.046478 | -1.390367 | 6  | -4.494958 | 0.017591  | 0.894143  |
| 6  | 2.426099  | -4.474384 | -2.394620 | 6  | -5.656807 | 0.785850  | 0.795593  |
| 1  | 3.873864  | -3.341937 | -1.275505 | 1  | -7.294357 | 1.406964  | -0.458903 |
|    |           |           |           | 1  | -3.918755 | -0.010038 | 1.813548  |
|    |           |           |           | 1  | -5.999892 | 1.358469  | 1.652021  |
|    |           |           |           | 1  | -3.088247 | -3.350675 | -1.726157 |
|    |           |           |           | 1  | -2.847038 | -2.382602 | 0.461577  |

|   |           |           |          |    |           |           |           |
|---|-----------|-----------|----------|----|-----------|-----------|-----------|
| 6 | -0.491738 | 0.688126  | 4.551063 | 6  | -5.764338 | -0.605174 | -1.811884 |
| 6 | 0.538839  | -0.317001 | 5.108752 | 1  | -6.495144 | 0.177868  | -1.586699 |
| 1 | 0.787901  | -0.052792 | 6.143057 | 1  | -6.086556 | -1.087671 | -2.743113 |
| 1 | 0.145012  | -1.336582 | 5.091671 | 6  | -5.592054 | -1.613306 | -0.697631 |
| 1 | 1.453049  | -0.294713 | 4.511983 | 6  | -6.580910 | -2.316792 | -0.011958 |
| 6 | 0.115880  | 2.098690  | 4.533703 | 6  | -4.241449 | -1.817496 | -0.394408 |
| 1 | -0.579263 | 2.825223  | 4.095237 | 6  | -6.200100 | -3.222723 | 0.980532  |
| 1 | 0.339347  | 2.423444  | 5.554871 | 1  | -7.631567 | -2.161247 | -0.241391 |
| 1 | 1.045569  | 2.098278  | 3.960242 | 6  | -3.855355 | -2.716650 | 0.597894  |
| 6 | -1.775616 | 0.675560  | 5.401941 | 6  | -4.848356 | -3.419193 | 1.283342  |
| 1 | -2.521598 | 1.369958  | 5.001058 | 1  | -6.960569 | -3.774987 | 1.524941  |
| 1 | -2.222185 | -0.322189 | 5.438064 | 1  | -2.808408 | -2.841459 | 0.842614  |
| 1 | -1.544929 | 0.977551  | 6.429339 | 1  | -4.566637 | -4.120156 | 2.063358  |
|   |           |           |          | 1  | -4.097917 | 0.215391  | -3.025388 |
|   |           |           |          | 1  | -2.700002 | -1.503799 | -1.913146 |
|   |           |           |          | 28 | -0.818539 | -0.316447 | 0.646806  |
|   |           |           |          | 6  | 0.783004  | 2.559947  | 4.469213  |
|   |           |           |          | 6  | 1.091470  | 1.499716  | 3.616353  |
|   |           |           |          | 6  | 0.087449  | 0.657784  | 3.100306  |
|   |           |           |          | 6  | -1.243127 | 0.924588  | 3.482975  |
|   |           |           |          | 6  | -1.550436 | 1.974951  | 4.342385  |
|   |           |           |          | 6  | -0.540140 | 2.805632  | 4.835286  |
|   |           |           |          | 1  | 1.579652  | 3.197976  | 4.842700  |
|   |           |           |          | 1  | 2.121883  | 1.336284  | 3.319269  |
|   |           |           |          | 1  | -2.028289 | 0.295524  | 3.078246  |
|   |           |           |          | 1  | -2.585653 | 2.156824  | 4.617440  |
|   |           |           |          | 1  | -0.782808 | 3.634844  | 5.493692  |
|   |           |           |          | 6  | 0.408759  | -0.380013 | 2.086258  |
|   |           |           |          | 6  | 1.486781  | -1.172430 | 2.221565  |
|   |           |           |          | 6  | 2.337490  | -1.436317 | 3.444298  |
|   |           |           |          | 1  | 1.809427  | -1.285536 | 4.387800  |
|   |           |           |          | 1  | 3.268793  | -0.840539 | 3.466581  |
|   |           |           |          | 8  | 2.677788  | -2.826030 | 3.323784  |
|   |           |           |          | 6  | 2.991492  | -3.013873 | 1.955303  |
|   |           |           |          | 1  | 4.020732  | -2.685657 | 1.747109  |
|   |           |           |          | 1  | 2.901357  | -4.076412 | 1.720392  |
|   |           |           |          | 6  | 2.021937  | -2.105729 | 1.136656  |
|   |           |           |          | 8  | 2.776616  | -1.300741 | 0.214487  |
|   |           |           |          | 6  | 0.920801  | -2.882073 | 0.438079  |
|   |           |           |          | 6  | 0.288126  | -3.937026 | 1.107046  |
|   |           |           |          | 6  | 0.474379  | -2.535122 | -0.839763 |
|   |           |           |          | 6  | -0.736024 | -4.654105 | 0.493090  |
|   |           |           |          | 1  | 0.589982  | -4.177594 | 2.121889  |
|   |           |           |          | 6  | -0.546919 | -3.258995 | -1.461571 |
|   |           |           |          | 1  | 0.941067  | -1.709864 | -1.358263 |
|   |           |           |          | 6  | -1.153700 | -4.324609 | -0.800196 |
|   |           |           |          | 1  | -1.213185 | -5.472130 | 1.025035  |
|   |           |           |          | 1  | -0.857485 | -2.985906 | -2.466527 |
|   |           |           |          | 1  | -1.951750 | -4.885657 | -1.276561 |
|   |           |           |          | 14 | 3.648960  | -1.589827 | -1.155367 |
|   |           |           |          | 8  | 5.181332  | -0.984469 | -0.952592 |
|   |           |           |          | 8  | 3.009122  | -0.704238 | -2.397916 |
|   |           |           |          | 6  | 6.039714  | -1.347949 | 0.123743  |
|   |           |           |          | 1  | 7.061286  | -1.378094 | -0.272320 |
|   |           |           |          | 1  | 5.810436  | -2.361153 | 0.484919  |
|   |           |           |          | 6  | 5.942269  | -0.349357 | 1.267821  |

### IM3C

SCF Energy = -3168.569723

Gibbs Free Energy = -3167.775348

|    |           |           |           |    |           |           |           |
|----|-----------|-----------|-----------|----|-----------|-----------|-----------|
| 6  | -1.267721 | 2.642177  | 0.260331  | 6  | 0.087449  | 0.657784  | 3.100306  |
| 6  | -2.653794 | 2.362747  | 0.194264  | 6  | -1.243127 | 0.924588  | 3.482975  |
| 6  | -3.578452 | 3.209861  | 0.808327  | 6  | -1.550436 | 1.974951  | 4.342385  |
| 6  | -3.135992 | 4.303552  | 1.552766  | 6  | -0.540140 | 2.805632  | 4.835286  |
| 6  | -1.770531 | 4.558166  | 1.661462  | 1  | 1.579652  | 3.197976  | 4.842700  |
| 6  | -0.844649 | 3.744729  | 1.004270  | 1  | 2.121883  | 1.336284  | 3.319269  |
| 1  | -4.637152 | 2.989995  | 0.720366  | 1  | -2.028289 | 0.295524  | 3.078246  |
| 1  | -3.855422 | 4.944781  | 2.051701  | 1  | -2.585653 | 2.156824  | 4.617440  |
| 1  | -1.418218 | 5.395139  | 2.255951  | 1  | -0.782808 | 3.634844  | 5.493692  |
| 1  | 0.214175  | 3.959557  | 1.086279  | 6  | 0.408759  | -0.380013 | 2.086258  |
| 15 | -0.075457 | 1.458140  | -0.505260 | 6  | 1.486781  | -1.172430 | 2.221565  |
| 6  | 1.521492  | 2.341071  | -0.449270 | 6  | 2.337490  | -1.436317 | 3.444298  |
| 6  | 1.772906  | 3.457778  | -1.261498 | 1  | 1.809427  | -1.285536 | 4.387800  |
| 6  | 2.513860  | 1.878453  | 0.422850  | 1  | 3.268793  | -0.840539 | 3.466581  |
| 6  | 3.000853  | 4.111321  | -1.191906 | 8  | 2.677788  | -2.826030 | 3.323784  |
| 1  | 1.011097  | 3.806186  | -1.951890 | 6  | 2.991492  | -3.013873 | 1.955303  |
| 6  | 3.737952  | 2.545594  | 0.498196  | 1  | 4.020732  | -2.685657 | 1.747109  |
| 1  | 2.331195  | 0.986240  | 1.007371  | 1  | 2.901357  | -4.076412 | 1.720392  |
| 6  | 3.983284  | 3.658290  | -0.306200 | 6  | 2.021937  | -2.105729 | 1.136656  |
| 1  | 3.193128  | 4.971414  | -1.826401 | 8  | 2.776616  | -1.300741 | 0.214487  |
| 1  | 4.502191  | 2.184977  | 1.177314  | 6  | 0.920801  | -2.882073 | 0.438079  |
| 1  | 4.940127  | 4.169106  | -0.250936 | 6  | 0.288126  | -3.937026 | 1.107046  |
| 6  | -0.516317 | 1.505801  | -2.294950 | 6  | 0.474379  | -2.535122 | -0.839763 |
| 6  | 0.035009  | 0.511017  | -3.118127 | 6  | -0.736024 | -4.654105 | 0.493090  |
| 6  | -1.405361 | 2.433814  | -2.852729 | 1  | 0.589982  | -4.177594 | 2.121889  |
| 6  | -0.305156 | 0.443801  | -4.468428 | 6  | -0.546919 | -3.258995 | -1.461571 |
| 1  | 0.746430  | -0.199091 | -2.710925 | 1  | 0.941067  | -1.709864 | -1.358263 |
| 6  | -1.754080 | 2.356086  | -4.202884 | 6  | -1.153700 | -4.324609 | -0.800196 |
| 1  | -1.839805 | 3.210635  | -2.233303 | 1  | -1.213185 | -5.472130 | 1.025035  |
| 6  | -1.208869 | 1.359362  | -5.012918 | 1  | -0.857485 | -2.985906 | -2.466527 |
| 1  | 0.136168  | -0.327239 | -5.093029 | 1  | -1.951750 | -4.885657 | -1.276561 |
| 1  | -2.450128 | 3.078276  | -4.619584 | 14 | 3.648960  | -1.589827 | -1.155367 |
| 1  | -1.480962 | 1.300037  | -6.062545 | 8  | 5.181332  | -0.984469 | -0.952592 |
| 6  | -3.124426 | 1.152046  | -0.499811 | 8  | 3.009122  | -0.704238 | -2.397916 |
| 8  | -4.239620 | 1.250949  | -1.254228 | 6  | 6.039714  | -1.347949 | 0.123743  |
| 6  | -3.356277 | -0.935388 | -1.250592 | 1  | 7.061286  | -1.378094 | -0.272320 |
| 6  | -4.363762 | -0.008813 | -1.989784 | 1  | 5.810436  | -2.361153 | 0.484919  |
| 7  | -2.540178 | 0.005885  | -0.460887 | 6  | 5.942269  | -0.349357 | 1.267821  |

|   |           |           |           |    |           |           |           |
|---|-----------|-----------|-----------|----|-----------|-----------|-----------|
| 1 | 4.918299  | -0.312464 | 1.648190  | 6  | -2.140287 | -1.563401 | -1.064211 |
| 1 | 6.614027  | -0.629651 | 2.086190  | 6  | -3.164658 | -2.439995 | -1.432771 |
| 1 | 6.217737  | 0.648823  | 0.916129  | 6  | -2.861781 | -3.686886 | -1.979703 |
| 6 | 3.513103  | 0.572001  | -2.822366 | 6  | -1.533437 | -4.055968 | -2.172823 |
| 1 | 2.652918  | 1.140513  | -3.187690 | 6  | -0.502036 | -3.173113 | -1.835068 |
| 1 | 3.933615  | 1.116361  | -1.972676 | 1  | -4.194242 | -2.145597 | -1.270850 |
| 6 | 4.553390  | 0.403920  | -3.917512 | 1  | -3.663928 | -4.364921 | -2.250908 |
| 1 | 4.883321  | 1.383178  | -4.282151 | 1  | -1.292202 | -5.024854 | -2.598401 |
| 1 | 5.423574  | -0.134336 | -3.532524 | 1  | 0.530125  | -3.453497 | -2.013130 |
| 1 | 4.137053  | -0.156976 | -4.760123 | 15 | 0.528575  | -0.712301 | -0.877799 |
| 6 | 3.689953  | -3.395987 | -1.615847 | 6  | 0.257383  | 0.569829  | -2.155688 |
| 1 | 4.354965  | -3.547082 | -2.471476 | 6  | -0.276327 | 0.227180  | -3.408573 |
| 1 | 4.060890  | -4.007820 | -0.786798 | 6  | 0.544519  | 1.910999  | -1.865799 |
| 1 | 2.694588  | -3.761803 | -1.877173 | 6  | -0.509340 | 1.217178  | -4.362313 |
| 1 | -1.460661 | -1.305106 | 1.544292  | 1  | -0.519115 | -0.805595 | -3.636037 |
|   |           |           |           | 6  | 0.309386  | 2.894828  | -2.825829 |
|   |           |           |           | 1  | 0.922459  | 2.183379  | -0.889426 |
|   |           |           |           | 6  | -0.217618 | 2.551782  | -4.071206 |
|   |           |           |           | 1  | -0.921562 | 0.946283  | -5.329282 |
|   |           |           |           | 1  | 0.516460  | 3.931218  | -2.584950 |
|   |           |           |           | 1  | -0.406521 | 3.321563  | -4.812967 |
|   |           |           |           | 6  | 2.104430  | -1.534403 | -1.274011 |
|   |           |           |           | 6  | 2.768824  | -2.264429 | -0.278464 |
|   |           |           |           | 6  | 2.656329  | -1.457666 | -2.561156 |
|   |           |           |           | 6  | 3.964632  | -2.916484 | -0.568347 |
|   |           |           |           | 1  | 2.357785  | -2.297386 | 0.724789  |
|   |           |           |           | 6  | 3.857119  | -2.107586 | -2.844544 |
|   |           |           |           | 1  | 2.156932  | -0.884791 | -3.334382 |
|   |           |           |           | 6  | 4.510957  | -2.837831 | -1.850967 |
|   |           |           |           | 1  | 4.477653  | -3.471923 | 0.209920  |
|   |           |           |           | 1  | 4.281802  | -2.041056 | -3.841233 |
|   |           |           |           | 1  | 5.447756  | -3.338934 | -2.073589 |
|   |           |           |           | 6  | -2.503760 | -0.275568 | -0.450886 |
|   |           |           |           | 8  | -3.741011 | 0.178795  | -0.706281 |
|   |           |           |           | 6  | -2.557796 | 1.634145  | 0.748961  |
|   |           |           |           | 6  | -3.838718 | 1.512830  | -0.126518 |
|   |           |           |           | 7  | -1.769524 | 0.449937  | 0.328326  |
|   |           |           |           | 6  | -3.747571 | 2.604886  | -1.215819 |
|   |           |           |           | 1  | -3.510932 | 2.138554  | -2.179276 |
|   |           |           |           | 1  | -4.695046 | 3.137578  | -1.339086 |
|   |           |           |           | 6  | -2.628136 | 3.502926  | -0.741791 |
|   |           |           |           | 6  | -2.237084 | 4.734178  | -1.261841 |
|   |           |           |           | 6  | -1.958148 | 2.961090  | 0.359489  |
|   |           |           |           | 6  | -1.167140 | 5.408091  | -0.666864 |
|   |           |           |           | 1  | -2.755664 | 5.167721  | -2.111781 |
|   |           |           |           | 6  | -0.900763 | 3.632354  | 0.967720  |
|   |           |           |           | 6  | -0.503403 | 4.861693  | 0.437125  |
|   |           |           |           | 1  | -0.855390 | 6.371550  | -1.058799 |
|   |           |           |           | 1  | -0.378916 | 3.204040  | 1.815514  |
|   |           |           |           | 1  | 0.319832  | 5.402404  | 0.893123  |
|   |           |           |           | 1  | -4.771544 | 1.542615  | 0.435628  |
|   |           |           |           | 1  | -2.734208 | 1.547091  | 1.826142  |

### IM3D\_iso

SCF Energy = -2529.87621

Gibbs Free Energy = -2529.253270

|    |           |           |           |   |           |           |           |
|----|-----------|-----------|-----------|---|-----------|-----------|-----------|
| 28 | -0.048050 | -0.156683 | 1.139871  | 1 | -0.406521 | 3.321563  | -4.812967 |
| 6  | -2.335258 | -4.261701 | 1.525549  | 6 | 2.104430  | -1.534403 | -1.274011 |
| 6  | -1.502072 | -3.223890 | 1.925766  | 6 | 2.768824  | -2.264429 | -0.278464 |
| 6  | -2.057451 | -2.006103 | 2.362043  | 6 | 2.656329  | -1.457666 | -2.561156 |
| 6  | -3.455005 | -1.844107 | 2.381292  | 6 | 3.964632  | -2.916484 | -0.568347 |
| 6  | -4.280291 | -2.891331 | 1.982021  | 1 | 2.357785  | -2.297386 | 0.724789  |
| 6  | -3.722874 | -4.098586 | 1.554510  | 6 | 3.857119  | -2.107586 | -2.844544 |
| 1  | -1.904542 | -5.196624 | 1.183528  | 1 | 2.156932  | -0.884791 | -3.334382 |
| 1  | -0.423626 | -3.330734 | 1.894265  | 6 | 4.510957  | -2.837831 | -1.850967 |
| 1  | -3.877414 | -0.902294 | 2.715273  | 1 | 4.477653  | -3.471923 | 0.209920  |
| 1  | -5.358035 | -2.766860 | 2.004892  | 1 | 4.281802  | -2.041056 | -3.841233 |
| 1  | -4.369746 | -4.911604 | 1.240955  | 1 | 5.447756  | -3.338934 | -2.073589 |
| 6  | -1.209231 | -0.923344 | 2.749229  | 6 | -2.503760 | -0.275568 | -0.450886 |
| 6  | -0.552121 | 0.047713  | 3.147490  | 8 | -3.741011 | 0.178795  | -0.706281 |
| 6  | 0.013209  | 0.953538  | 4.181502  | 6 | -2.557796 | 1.634145  | 0.748961  |
| 1  | -0.812748 | 1.505504  | 4.640340  | 6 | -3.838718 | 1.512830  | -0.126518 |
| 1  | 0.473399  | 0.331568  | 4.964322  | 7 | -1.769524 | 0.449937  | 0.328326  |
| 8  | 0.925149  | 1.933918  | 3.732637  | 6 | -3.747571 | 2.604886  | -1.215819 |
| 6  | 2.203191  | 1.454213  | 3.379736  | 1 | -3.510932 | 2.138554  | -2.179276 |
| 1  | 2.389746  | 0.458073  | 3.801899  | 1 | -4.695046 | 3.137578  | -1.339086 |
| 1  | 2.950850  | 2.134932  | 3.807191  | 6 | -2.628136 | 3.502926  | -0.741791 |
| 6  | 2.403761  | 1.417036  | 1.865589  | 6 | -2.237084 | 4.734178  | -1.261841 |
| 8  | 1.507016  | 1.827442  | 1.132735  | 6 | -1.958148 | 2.961090  | 0.359489  |
| 6  | 3.678169  | 0.902163  | 1.318413  | 6 | -1.167140 | 5.408091  | -0.666864 |
| 6  | 4.640655  | 0.271290  | 2.123687  | 1 | -2.755664 | 5.167721  | -2.111781 |
| 6  | 3.907587  | 1.022052  | -0.062769 | 6 | -0.900763 | 3.632354  | 0.967720  |
| 6  | 5.804388  | -0.238624 | 1.553480  | 6 | -0.503403 | 4.861693  | 0.437125  |
| 1  | 4.489158  | 0.168588  | 3.192739  | 1 | -0.855390 | 6.371550  | -1.058799 |
| 6  | 5.072723  | 0.519891  | -0.627376 | 1 | -0.378916 | 3.204040  | 1.815514  |
| 1  | 3.160876  | 1.510987  | -0.676564 | 1 | 0.319832  | 5.402404  | 0.893123  |
| 6  | 6.020059  | -0.115909 | 0.179372  | 1 | -4.771544 | 1.542615  | 0.435628  |
| 1  | 6.542897  | -0.728934 | 2.179235  | 1 | -2.734208 | 1.547091  | 1.826142  |
| 1  | 5.238662  | 0.608680  | -1.695278 |   |           |           |           |
| 1  | 6.927415  | -0.515087 | -0.262828 |   |           |           |           |
| 1  | 1.143648  | -0.840775 | 1.573403  |   |           |           |           |
| 6  | -0.789662 | -1.926631 | -1.281771 |   |           |           |           |

### IM3D

SCF Energy = -2529.874249

Gibbs Free Energy = -2529.249669





|    |           |           |           |    |           |           |           |
|----|-----------|-----------|-----------|----|-----------|-----------|-----------|
| 6  | 0.891861  | 0.806226  | 3.669955  | 1  | -3.518716 | -3.308999 | 3.267885  |
| 1  | 2.433988  | 0.968504  | 2.176152  | 1  | -4.505296 | -1.858529 | 3.530917  |
| 6  | -0.885289 | -0.762421 | 3.195617  | 1  | -5.215257 | -3.292189 | 2.789025  |
| 1  | -0.769871 | -1.779474 | 1.307259  |    |           |           |           |
| 6  | -0.298949 | 0.183240  | 4.040856  |    |           |           |           |
| 1  | 1.345091  | 1.547525  | 4.320902  |    |           |           |           |
| 1  | -1.821575 | -1.237897 | 3.468389  |    |           |           |           |
| 1  | -0.775945 | 0.441858  | 4.981285  |    |           |           |           |
| 6  | 2.133553  | -2.590979 | 0.058840  | 28 | 0.637791  | 0.642812  | -0.534130 |
| 6  | 2.582976  | -3.141485 | 1.267586  | 8  | -2.925821 | 1.787382  | -1.985874 |
| 6  | 2.119333  | -3.375787 | -1.101763 | 16 | -2.066482 | 0.616335  | -1.732731 |
| 6  | 3.025258  | -4.463169 | 1.309569  | 8  | -1.164723 | 0.167460  | -2.814748 |
| 1  | 2.574263  | -2.540021 | 2.171233  | 8  | -1.286444 | 0.801384  | -0.408197 |
| 6  | 2.567798  | -4.695219 | -1.055608 | 6  | -3.147443 | -0.765900 | -1.381298 |
| 1  | 1.735230  | -2.955063 | -2.025880 | 6  | -4.292851 | -0.571745 | -0.615428 |
| 6  | 3.021193  | -5.238617 | 0.147990  | 6  | -2.795900 | -2.036523 | -1.832038 |
| 1  | 3.366792  | -4.888767 | 2.248223  | 6  | -5.073056 | -1.671325 | -0.269392 |
| 1  | 2.550883  | -5.301403 | -1.955895 | 1  | -4.563528 | 0.423809  | -0.292781 |
| 1  | 3.361634  | -6.269056 | 0.183606  | 6  | -3.582129 | -3.127914 | -1.472810 |
| 6  | 1.815476  | 2.170597  | -0.930599 | 1  | -1.920181 | -2.148643 | -2.458530 |
| 8  | 1.863920  | 3.519013  | -0.905797 | 6  | -4.721135 | -2.965691 | -0.673451 |
| 6  | -0.323553 | 2.736019  | -1.260582 | 1  | -5.961560 | -1.521017 | 0.337948  |
| 6  | 0.545708  | 4.017407  | -1.309162 | 1  | -3.308817 | -4.122913 | -1.815584 |
| 7  | 0.673619  | 1.641931  | -1.208289 | 6  | -5.520959 | -4.161889 | -0.226446 |
| 6  | 0.007818  | 4.985239  | -0.246955 | 1  | -6.538225 | -3.881671 | 0.060646  |
| 1  | 0.827463  | 5.492153  | 0.271532  | 1  | -5.583887 | -4.921474 | -1.011632 |
| 1  | -0.600592 | 5.761387  | -0.727730 | 1  | -5.047101 | -4.631520 | 0.644654  |
| 6  | -0.831828 | 4.101493  | 0.649326  | 6  | 0.814461  | 2.511737  | -0.966340 |
| 6  | -1.377143 | 4.392291  | 1.898589  | 6  | 0.509755  | 3.153970  | 0.171789  |
| 6  | -1.052955 | 2.852449  | 0.061065  | 6  | 0.290644  | 4.614871  | 0.480131  |
| 6  | -2.139311 | 3.416502  | 2.546667  | 1  | 0.899929  | 5.270365  | -0.144623 |
| 1  | -1.210427 | 5.359293  | 2.365249  | 1  | 0.557742  | 4.792720  | 1.528034  |
| 6  | -1.807506 | 1.875636  | 0.702883  | 8  | -1.062859 | 5.084505  | 0.288376  |
| 6  | -2.353503 | 2.168490  | 1.952526  | 6  | -2.108361 | 4.144753  | 0.246568  |
| 1  | -2.566385 | 3.629702  | 3.522327  | 1  | -3.001531 | 4.726456  | -0.002800 |
| 1  | -1.958795 | 0.909042  | 0.241787  | 1  | -1.988047 | 3.397508  | -0.549754 |
| 1  | -2.940110 | 1.413236  | 2.464725  | 6  | -2.348573 | 3.368591  | 1.530802  |
| 1  | 0.665877  | 4.460637  | -2.300028 | 8  | -1.528442 | 3.347887  | 2.438231  |
| 1  | -0.985451 | 2.572978  | -2.111127 | 6  | -3.618557 | 2.574432  | 1.648188  |
| 28 | 0.090559  | -0.256677 | -1.402074 | 6  | -4.723909 | 2.768697  | 0.808440  |
| 8  | -1.490700 | 0.314099  | -2.302733 | 6  | -3.706219 | 1.633716  | 2.685037  |
| 16 | -2.704472 | -0.587691 | -2.677493 | 6  | -5.905136 | 2.056608  | 1.024485  |
| 8  | -3.786106 | 0.285981  | -3.153438 | 1  | -4.670529 | 3.463014  | -0.020747 |
| 8  | -2.306490 | -1.740824 | -3.496782 | 6  | -4.876443 | 0.908381  | 2.886825  |
| 6  | -3.232253 | -1.240916 | -1.084079 | 1  | -2.841831 | 1.502455  | 3.326685  |
| 6  | -4.039208 | -0.461027 | -0.256837 | 6  | -5.984728 | 1.127196  | 2.062487  |
| 6  | -2.790415 | -2.494374 | -0.661370 | 1  | -6.758440 | 2.221314  | 0.373983  |
| 6  | -4.371071 | -0.925003 | 1.015629  | 1  | -4.934245 | 0.186260  | 3.696307  |
| 1  | -4.395924 | 0.498291  | -0.614576 | 1  | -6.905168 | 0.574872  | 2.228465  |
| 6  | -3.133804 | -2.950326 | 0.610320  | 1  | 0.252473  | 2.530539  | 1.029916  |
| 1  | -2.186026 | -3.092956 | -1.332394 | 6  | 1.096924  | 3.120008  | -2.344830 |
| 6  | -3.919700 | -2.170553 | 1.470882  | 6  | -0.189849 | 3.821766  | -2.841399 |
| 1  | -4.995951 | -0.314046 | 1.662237  | 1  | -0.018948 | 4.251435  | -3.836014 |
| 1  | -2.788630 | -3.926900 | 0.941080  | 1  | -0.485339 | 4.626967  | -2.164079 |
| 1  | -0.240851 | -1.656522 | -1.491328 | 1  | -1.020048 | 3.117028  | -2.912458 |
| 6  | -4.305523 | -2.681355 | 2.837700  | 6  | 1.482725  | 2.036924  | -3.372860 |

**IM4B**

SCF Energy = -3351.131522

Gibbs Free Energy = -3350.350930

|    |           |           |           |    |           |           |           |
|----|-----------|-----------|-----------|----|-----------|-----------|-----------|
| 1  | 2.455312  | 1.590442  | -3.139641 | 1  | 2.367980  | 2.416572  | 1.684434  |
| 1  | 1.562100  | 2.485046  | -4.369815 | 1  | 3.271336  | 2.410149  | 4.011125  |
| 1  | 0.731463  | 1.246621  | -3.404697 | 1  | 5.389109  | 0.906426  | -1.909404 |
| 6  | 2.240272  | 4.160804  | -2.311849 | 1  | 3.464591  | 2.093720  | -0.969753 |
| 1  | 3.178901  | 3.731133  | -1.945716 |    |           |           |           |
| 1  | 2.004433  | 5.022088  | -1.685777 |    |           |           |           |
| 1  | 2.426724  | 4.530892  | -3.326609 |    |           |           |           |
| 6  | 1.007627  | -2.380844 | -1.325908 |    |           |           |           |
| 6  | 2.077010  | -1.860042 | -2.093190 |    |           |           |           |
| 6  | 2.410230  | -2.434541 | -3.322416 | 28 | -0.006220 | -0.371221 | -0.704706 |
| 6  | 1.664830  | -3.502548 | -3.821098 | 6  | -3.420794 | 3.298942  | -1.283792 |
| 6  | 0.605005  | -4.013484 | -3.075382 | 6  | -2.386659 | 2.373186  | -1.348905 |
| 6  | 0.287177  | -3.463160 | -1.830319 | 6  | -2.661290 | 1.008092  | -1.546486 |
| 1  | 3.244695  | -2.031971 | -3.885415 | 6  | -3.999686 | 0.587063  | -1.669656 |
| 1  | 1.914194  | -3.931459 | -4.785945 | 6  | -5.031158 | 1.520226  | -1.594016 |
| 1  | 0.022024  | -4.845840 | -3.457542 | 6  | -4.747176 | 2.872819  | -1.400432 |
| 1  | -0.534385 | -3.871187 | -1.254004 | 1  | -3.197396 | 4.349608  | -1.128994 |
| 15 | 0.611313  | -1.533657 | 0.254196  | 1  | -1.357125 | 2.697864  | -1.238659 |
| 6  | 2.032373  | -1.996510 | 1.322253  | 1  | -4.216598 | -0.468492 | -1.781949 |
| 6  | 2.982488  | -2.963233 | 0.972374  | 1  | -6.060937 | 1.187791  | -1.679948 |
| 6  | 2.142457  | -1.339861 | 2.556718  | 1  | -5.555523 | 3.594587  | -1.336349 |
| 6  | 4.028122  | -3.268786 | 1.846724  | 6  | -1.582950 | 0.037676  | -1.557212 |
| 1  | 2.909609  | -3.479676 | 0.021363  | 6  | -1.391560 | -1.065068 | -2.289367 |
| 6  | 3.174149  | -1.660402 | 3.433653  | 6  | -2.259902 | -1.672940 | -3.370153 |
| 1  | 1.424405  | -0.570298 | 2.823702  | 1  | -2.705041 | -0.879615 | -3.974284 |
| 6  | 4.122561  | -2.622012 | 3.078254  | 1  | -1.663631 | -2.329536 | -4.019706 |
| 1  | 4.761411  | -4.019416 | 1.566259  | 8  | -3.366881 | -2.397026 | -2.833584 |
| 1  | 3.254376  | -1.139857 | 4.381305  | 6  | -2.998767 | -3.453153 | -1.968481 |
| 1  | 4.935131  | -2.860295 | 3.757734  | 1  | -2.186241 | -4.046164 | -2.403946 |
| 6  | -0.767432 | -2.425223 | 1.046719  | 1  | -3.875651 | -4.102885 | -1.883133 |
| 6  | -1.881270 | -1.684550 | 1.463922  | 6  | -2.685255 | -2.957818 | -0.541975 |
| 6  | -0.690722 | -3.796515 | 1.340429  | 8  | -3.484180 | -2.213428 | 0.007252  |
| 6  | -2.916691 | -2.318229 | 2.152171  | 6  | -1.450056 | -3.410205 | 0.171058  |
| 1  | -1.939331 | -0.627572 | 1.231717  | 6  | -0.403186 | -4.105908 | -0.454275 |
| 6  | -1.735242 | -4.425352 | 2.012649  | 6  | -1.335272 | -3.090183 | 1.534314  |
| 1  | 0.190781  | -4.363834 | 1.057534  | 6  | 0.734470  | -4.466332 | 0.267922  |
| 6  | -2.848478 | -3.684230 | 2.421305  | 1  | -0.461736 | -4.371163 | -1.503512 |
| 1  | -3.777904 | -1.737029 | 2.461658  | 6  | -0.206982 | -3.459573 | 2.255583  |
| 1  | -1.675504 | -5.486987 | 2.233212  | 1  | -2.152851 | -2.558885 | 2.007665  |
| 1  | -3.656773 | -4.173812 | 2.956861  | 6  | 0.832663  | -4.146939 | 1.622499  |
| 6  | 2.886699  | -0.737694 | -1.587599 | 1  | 1.535090  | -5.010545 | -0.223544 |
| 8  | 4.199890  | -0.769877 | -1.879446 | 1  | -0.129809 | -3.207167 | 3.307547  |
| 6  | 3.637260  | 1.108780  | -0.538512 | 1  | 1.713976  | -4.436408 | 2.186395  |
| 6  | 4.832210  | 0.334312  | -1.167171 | 1  | -0.528246 | -1.721215 | -1.999228 |
| 7  | 2.474188  | 0.261872  | -0.880682 | 6  | 0.664613  | -0.084233 | 2.397287  |
| 6  | 5.713584  | -0.180974 | -0.008420 | 6  | 1.811181  | -0.887644 | 2.206824  |
| 1  | 5.631123  | -1.271814 | 0.055119  | 6  | 2.429390  | -1.495697 | 3.306363  |
| 1  | 6.770157  | 0.058425  | -0.165265 | 6  | 1.890495  | -1.356652 | 4.584050  |
| 6  | 5.141654  | 0.489039  | 1.219816  | 6  | 0.734277  | -0.600458 | 4.769531  |
| 6  | 5.656148  | 0.488001  | 2.514603  | 6  | 0.133406  | 0.041145  | 3.682747  |
| 6  | 3.963545  | 1.184214  | 0.933293  | 1  | 3.319205  | -2.093150 | 3.147490  |
| 6  | 4.974643  | 1.184621  | 3.514899  | 1  | 2.370036  | -1.841302 | 5.427778  |
| 1  | 6.574584  | -0.044684 | 2.744143  | 1  | 0.303986  | -0.494132 | 5.760093  |
| 6  | 3.275530  | 1.876787  | 1.927357  | 1  | -0.749137 | 0.651308  | 3.837001  |
| 6  | 3.790166  | 1.869871  | 3.225184  | 15 | -0.040662 | 0.879168  | 1.001494  |
| 1  | 5.369454  | 1.195058  | 4.526690  | 6  | 1.148652  | 2.247662  | 0.812594  |

**IM4D**

SCF Energy = -2529.911961

Gibbs Free Energy = -2529.282577

|                                  |           |           |           |    |           |           |           |
|----------------------------------|-----------|-----------|-----------|----|-----------|-----------|-----------|
| 6                                | 1.744301  | 2.856232  | 1.928374  | 6  | 4.072026  | 0.228753  | 3.742503  |
| 6                                | 1.492244  | 2.673204  | -0.478327 | 1  | 2.454572  | 1.664129  | 3.711912  |
| 6                                | 2.658432  | 3.892705  | 1.749256  | 6  | 4.773031  | -0.755715 | 3.034352  |
| 1                                | 1.501007  | 2.516706  | 2.930083  | 1  | 4.897957  | -1.813183 | 1.160905  |
| 6                                | 2.411023  | 3.707388  | -0.651255 | 1  | 4.362240  | 0.460124  | 4.764063  |
| 1                                | 1.062879  | 2.180725  | -1.343776 | 6  | 5.954594  | -1.463862 | 3.648281  |
| 6                                | 2.991000  | 4.319087  | 0.460737  | 1  | 5.971961  | -1.350364 | 4.735700  |
| 1                                | 3.115019  | 4.363723  | 2.613874  | 1  | 5.945794  | -2.533855 | 3.416713  |
| 1                                | 2.680026  | 4.020345  | -1.653865 | 1  | 6.896717  | -1.058674 | 3.258567  |
| 1                                | 3.707813  | 5.122895  | 0.325847  | 6  | -0.969684 | 2.317815  | -1.738753 |
| 6                                | -1.606505 | 1.545955  | 1.617409  | 6  | -0.323465 | 1.540980  | -2.474899 |
| 6                                | -2.737532 | 0.715519  | 1.572239  | 6  | 0.612568  | 1.208920  | -3.580952 |
| 6                                | -1.716444 | 2.861807  | 2.085592  | 1  | 0.060894  | 1.188572  | -4.526857 |
| 6                                | -3.969362 | 1.205446  | 1.995526  | 1  | 1.052933  | 0.220571  | -3.434437 |
| 1                                | -2.673894 | -0.291219 | 1.171475  | 8  | 1.622074  | 2.197416  | -3.746581 |
| 6                                | -2.954712 | 3.342633  | 2.509009  | 6  | 2.535121  | 2.283826  | -2.671835 |
| 1                                | -0.848268 | 3.511041  | 2.103808  | 1  | 3.081044  | 3.224706  | -2.803476 |
| 6                                | -4.079726 | 2.518173  | 2.460184  | 1  | 2.025905  | 2.345077  | -1.700620 |
| 1                                | -4.844581 | 0.567353  | 1.937420  | 6  | 3.542220  | 1.136294  | -2.642866 |
| 1                                | -3.041481 | 4.363720  | 2.866317  | 8  | 3.463022  | 0.213947  | -3.445835 |
| 1                                | -5.044892 | 2.900913  | 2.776448  | 6  | 4.619800  | 1.163353  | -1.608871 |
| 6                                | 2.363825  | -1.148069 | 0.872625  | 6  | 4.662600  | 2.124288  | -0.588228 |
| 8                                | 3.646470  | -1.535993 | 0.819721  | 6  | 5.607789  | 0.166844  | -1.659862 |
| 6                                | 2.692246  | -1.407337 | -1.346111 | 6  | 5.673741  | 2.077689  | 0.370558  |
| 6                                | 4.031345  | -1.631215 | -0.584761 | 1  | 3.881389  | 2.866993  | -0.493101 |
| 7                                | 1.738872  | -1.073271 | -0.257574 | 6  | 6.618663  | 0.128730  | -0.706898 |
| 6                                | 4.984346  | -0.479744 | -0.974709 | 1  | 5.558808  | -0.564892 | -2.458819 |
| 1                                | 5.243053  | 0.104429  | -0.085548 | 6  | 6.650561  | 1.085033  | 0.313671  |
| 1                                | 5.921828  | -0.866081 | -1.387477 | 1  | 5.680919  | 2.805958  | 1.174883  |
| 6                                | 4.211431  | 0.323634  | -1.997265 | 1  | 7.380166  | -0.644373 | -0.752520 |
| 6                                | 4.622989  | 1.465758  | -2.682374 | 1  | 7.432959  | 1.049356  | 1.066340  |
| 6                                | 2.952677  | -0.227689 | -2.250462 | 1  | -2.053995 | 0.088628  | -1.725181 |
| 6                                | 3.761104  | 2.042461  | -3.618569 | 6  | -0.027908 | -1.990227 | 1.004387  |
| 1                                | 5.601043  | 1.899883  | -2.498236 | 6  | -0.559104 | -1.232769 | 2.072325  |
| 6                                | 2.094374  | 0.332995  | -3.195301 | 6  | -0.004391 | -1.353164 | 3.351488  |
| 6                                | 2.506095  | 1.479803  | -3.877831 | 6  | 1.069825  | -2.208249 | 3.583639  |
| 1                                | 4.074447  | 2.928571  | -4.161803 | 6  | 1.586516  | -2.965583 | 2.536833  |
| 1                                | 1.122611  | -0.105508 | -3.399984 | 6  | 1.036651  | -2.857338 | 1.258202  |
| 1                                | 1.854252  | 1.930003  | -4.619560 | 1  | -0.405791 | -0.742963 | 4.150516  |
| 1                                | 4.466831  | -2.620496 | -0.720331 | 1  | 1.508757  | -2.267580 | 4.573838  |
| 1                                | 2.319035  | -2.292896 | -1.870191 | 1  | 2.429761  | -3.627900 | 2.704155  |
|                                  |           |           |           | 1  | 1.454835  | -3.438227 | 0.444453  |
|                                  |           |           |           | 15 | -0.716398 | -1.795410 | -0.690811 |
| <b>IM4</b>                       |           |           |           | 6  | -2.260655 | -2.774299 | -0.573804 |
| SCF Energy = -3424.903328        |           |           |           | 6  | -2.336078 | -3.908947 | 0.249784  |
| Gibbs Free Energy = -3424.161942 |           |           |           | 6  | -3.400262 | -2.364374 | -1.275842 |
|                                  |           |           |           | 6  | -3.529286 | -4.620845 | 0.359552  |
| 28                               | -0.927294 | 0.431263  | -0.950414 | 1  | -1.464835 | -4.224743 | 0.814185  |
| 8                                | 1.877224  | 2.819924  | 0.574873  | 6  | -4.595808 | -3.072013 | -1.157650 |
| 16                               | 1.310162  | 1.548220  | 1.092273  | 1  | -3.357619 | -1.473000 | -1.889788 |
| 8                                | 0.271628  | 1.731134  | 2.128087  | 6  | -4.661890 | -4.201034 | -0.341591 |
| 8                                | 0.898540  | 0.629748  | -0.053511 | 1  | -3.577383 | -5.496324 | 1.000259  |
| 6                                | 2.638440  | 0.612977  | 1.848636  | 1  | -5.477469 | -2.723535 | -1.684488 |
| 6                                | 3.311007  | -0.374233 | 1.131179  | 1  | -5.595054 | -4.747736 | -0.243511 |
| 6                                | 3.008268  | 0.913702  | 3.158317  | 6  | 0.429633  | -2.752491 | -1.736766 |
| 6                                | 4.369789  | -1.051195 | 1.726653  | 6  | 1.613150  | -2.104245 | -2.124838 |
| 1                                | 3.001773  | -0.611250 | 0.123372  |    |           |           |           |

|    |           |           |           |    |           |           |           |
|----|-----------|-----------|-----------|----|-----------|-----------|-----------|
| 6  | 0.182109  | -4.060190 | -2.172102 | 1  | 5.728367  | 3.219491  | -0.438515 |
| 6  | 2.541309  | -2.755518 | -2.933095 | 6  | 1.861194  | -0.292171 | -1.688394 |
| 1  | 1.797981  | -1.087574 | -1.796746 | 6  | 2.050158  | -1.166084 | -2.697149 |
| 6  | 1.114667  | -4.710345 | -2.982700 | 6  | 1.021013  | -2.187455 | -3.047114 |
| 1  | -0.733040 | -4.565288 | -1.882082 | 1  | 0.438734  | -1.911268 | -3.934130 |
| 6  | 2.291355  | -4.061766 | -3.361714 | 1  | 1.436325  | -3.185477 | -3.228016 |
| 1  | 3.432033  | -2.220222 | -3.242005 | 8  | 0.049923  | -2.261507 | -1.963700 |
| 1  | 0.917775  | -5.723311 | -3.321437 | 6  | 0.252410  | -3.331224 | -1.009467 |
| 1  | 3.008336  | -4.569944 | -3.999761 | 1  | 0.684052  | -4.189342 | -1.527609 |
| 6  | -1.661191 | -0.271519 | 1.895302  | 1  | -0.739263 | -3.597007 | -0.641420 |
| 8  | -2.374035 | 0.000714  | 3.009676  | 6  | 1.067286  | -2.865835 | 0.213279  |
| 6  | -3.152587 | 1.217076  | 1.135986  | 8  | 0.438032  | -2.325415 | 1.118873  |
| 6  | -3.384871 | 0.983371  | 2.657934  | 6  | 2.533479  | -3.038425 | 0.286919  |
| 7  | -2.008577 | 0.341463  | 0.819695  | 6  | 3.286709  | -3.634202 | -0.736293 |
| 6  | -4.801206 | 0.397073  | 2.833483  | 6  | 3.192405  | -2.552316 | 1.430635  |
| 1  | -4.747887 | -0.557594 | 3.366883  | 6  | 4.672203  | -3.724164 | -0.627605 |
| 1  | -5.430762 | 1.065318  | 3.432192  | 1  | 2.804112  | -4.026410 | -1.622955 |
| 6  | -5.333537 | 0.257212  | 1.424116  | 6  | 4.574465  | -2.641864 | 1.537541  |
| 6  | -6.564659 | -0.255870 | 1.017078  | 1  | 2.598123  | -2.106424 | 2.219213  |
| 6  | -4.433795 | 0.759628  | 0.479704  | 6  | 5.317695  | -3.224943 | 0.505860  |
| 6  | -6.888215 | -0.248245 | -0.341542 | 1  | 5.248211  | -4.183631 | -1.423839 |
| 1  | -7.267320 | -0.651096 | 1.745510  | 1  | 5.075885  | -2.265005 | 2.423108  |
| 6  | -4.757649 | 0.779373  | -0.875106 | 1  | 6.397585  | -3.296365 | 0.588247  |
| 6  | -5.992933 | 0.272635  | -1.282237 | 1  | 2.937883  | -1.126500 | -3.329992 |
| 1  | -7.846076 | -0.641824 | -0.669095 | 6  | -0.764014 | 2.573063  | -0.571437 |
| 1  | -4.053196 | 1.174738  | -1.596724 | 6  | -1.851515 | 2.318164  | -1.446039 |
| 1  | -6.260580 | 0.282327  | -2.334833 | 6  | -2.388299 | 3.357860  | -2.216473 |
| 1  | -3.197104 | 1.862336  | 3.275248  | 6  | -1.833443 | 4.634711  | -2.163107 |
| 1  | -2.884190 | 2.244211  | 0.885416  | 6  | -0.738167 | 4.877997  | -1.337489 |
| 6  | -1.688667 | 3.402074  | -1.133560 | 6  | -0.212036 | 3.855111  | -0.544171 |
| 6  | -2.966404 | 3.748828  | -1.612898 | 1  | -3.231970 | 3.150930  | -2.863997 |
| 6  | -1.160695 | 4.082174  | -0.018956 | 1  | -2.249472 | 5.429964  | -2.772086 |
| 6  | -3.715482 | 4.730459  | -0.970495 | 1  | -0.288699 | 5.865142  | -1.304010 |
| 1  | -3.361964 | 3.235099  | -2.482587 | 1  | 0.644577  | 4.056984  | 0.086146  |
| 6  | -1.917467 | 5.067815  | 0.609433  | 15 | -0.088455 | 1.182034  | 0.411785  |
| 1  | -0.170995 | 3.827831  | 0.341265  | 6  | -1.361797 | 0.807742  | 1.681102  |
| 6  | -3.197100 | 5.387817  | 0.147730  | 6  | -2.665117 | 1.317445  | 1.640706  |
| 1  | -4.704371 | 4.981438  | -1.342183 | 6  | -0.972254 | -0.007627 | 2.754537  |
| 1  | -1.504390 | 5.584363  | 1.470541  | 6  | -3.567386 | 1.012358  | 2.658721  |
| 1  | -3.784105 | 6.150422  | 0.650799  | 1  | -2.982590 | 1.967807  | 0.834644  |
|    |           |           |           | 6  | -1.874778 | -0.299749 | 3.772990  |
|    |           |           |           | 1  | 0.031473  | -0.413341 | 2.792142  |
|    |           |           |           | 6  | -3.174405 | 0.206870  | 3.726513  |
|    |           |           |           | 1  | -4.576269 | 1.409424  | 2.616515  |
|    |           |           |           | 1  | -1.562734 | -0.928031 | 4.601243  |
| 28 | 0.058132  | -0.392776 | -1.071026 | 1  | -3.878608 | -0.026459 | 4.518460  |
| 6  | 5.200236  | 1.139324  | -0.654809 | 6  | 1.281420  | 1.743094  | 1.465087  |
| 6  | 4.200673  | 0.229746  | -0.995728 | 6  | 2.391796  | 0.906200  | 1.613988  |
| 6  | 2.927769  | 0.678607  | -1.385152 | 6  | 1.166699  | 2.894013  | 2.260930  |
| 6  | 2.698605  | 2.060918  | -1.461653 | 6  | 3.412144  | 1.247975  | 2.498636  |
| 6  | 3.700233  | 2.969123  | -1.129220 | 1  | 2.461456  | -0.000986 | 1.032479  |
| 6  | 4.951434  | 2.511930  | -0.709864 | 6  | 2.192407  | 3.234731  | 3.139654  |
| 1  | 6.175194  | 0.775893  | -0.343461 | 1  | 0.274395  | 3.509146  | 2.214138  |
| 1  | 4.387457  | -0.836942 | -0.933867 | 6  | 3.320870  | 2.418310  | 3.251568  |
| 1  | 1.729672  | 2.418442  | -1.792160 | 1  | 4.278966  | 0.601568  | 2.588219  |
| 1  | 3.506092  | 4.035518  | -1.197001 | 1  | 2.105572  | 4.130547  | 3.746061  |

**IM5D**

SCF Energy = -2529.916337

Gibbs Free Energy = -2529.283853

|                                  |           |           |           |    |           |           |           |
|----------------------------------|-----------|-----------|-----------|----|-----------|-----------|-----------|
| 1                                | 4.118796  | 2.689419  | 3.935533  | 6  | -3.378336 | -2.061524 | -1.283468 |
| 6                                | -2.438117 | 0.976111  | -1.586089 | 6  | -3.648418 | -1.051071 | -0.350380 |
| 8                                | -3.682706 | 0.913955  | -2.076477 | 6  | -3.770531 | -3.381092 | -1.005627 |
| 6                                | -2.888785 | -1.222441 | -1.484663 | 6  | -4.309596 | -1.358008 | 0.839275  |
| 6                                | -4.027662 | -0.501045 | -2.255728 | 1  | -3.317042 | -0.037516 | -0.521259 |
| 7                                | -1.879147 | -0.155839 | -1.288690 | 6  | -4.424537 | -3.685477 | 0.183264  |
| 6                                | -5.349715 | -0.824621 | -1.551299 | 1  | -3.548344 | -4.146290 | -1.742023 |
| 1                                | -5.962794 | 0.075598  | -1.445754 | 6  | -4.696655 | -2.671058 | 1.107887  |
| 1                                | -5.928014 | -1.537045 | -2.151203 | 1  | -4.506321 | -0.564310 | 1.551181  |
| 6                                | -4.922789 | -1.428353 | -0.232382 | 1  | -4.728948 | -4.707111 | 0.390842  |
| 6                                | -5.724456 | -1.774263 | 0.853791  | 1  | -5.210097 | -2.907732 | 2.035610  |
| 6                                | -3.544979 | -1.667324 | -0.194743 | 1  | 1.914877  | -0.513062 | -1.199893 |
| 6                                | -5.128979 | -2.361616 | 1.971565  | 6  | 0.216364  | 0.453943  | 2.204136  |
| 1                                | -6.795284 | -1.594532 | 0.831532  | 6  | -0.702145 | -0.616461 | 2.111741  |
| 6                                | -2.941947 | -2.238335 | 0.923801  | 6  | -1.738628 | -0.729059 | 3.045423  |
| 6                                | -3.749495 | -2.588806 | 2.006449  | 6  | -1.892758 | 0.227189  | 4.047318  |
| 1                                | -5.742078 | -2.638928 | 2.823417  | 6  | -1.003232 | 1.297905  | 4.125187  |
| 1                                | -1.867332 | -2.374055 | 0.977152  | 6  | 0.044823  | 1.407458  | 3.208062  |
| 1                                | -3.297895 | -3.027283 | 2.890009  | 1  | -2.420003 | -1.567261 | 2.970198  |
| 1                                | -4.040028 | -0.679757 | -3.332614 | 1  | -2.704412 | 0.134428  | 4.762000  |
| 1                                | -2.427730 | -2.040488 | -2.041631 | 1  | -1.119352 | 2.050498  | 4.899049  |
|                                  |           |           |           | 1  | 0.735385  | 2.239888  | 3.270413  |
|                                  |           |           |           | 15 | 1.618594  | 0.541601  | 1.021084  |
| <b>IM5</b>                       |           |           |           | 6  | 2.655300  | -0.880230 | 1.563308  |
| SCF Energy = -3424.904552        |           |           |           | 6  | 2.433081  | -1.577982 | 2.757104  |
| Gibbs Free Energy = -3424.161298 |           |           |           | 6  | 3.723996  | -1.265441 | 0.740670  |
|                                  |           |           |           | 6  | 3.257599  | -2.647832 | 3.114208  |
| 28                               | 0.682818  | 0.131324  | -0.986435 | 6  | 3.257599  | -2.647832 | 3.114208  |
| 8                                | -1.458375 | 3.072372  | -1.874986 | 1  | 1.617931  | -1.290387 | 3.411111  |
| 16                               | -1.385296 | 2.508918  | -0.512290 | 6  | 4.554582  | -2.320176 | 1.105631  |
| 8                                | -0.533204 | 3.219013  | 0.464421  | 1  | 3.894906  | -0.742959 | -0.194810 |
| 8                                | -1.087609 | 1.005584  | -0.519499 | 6  | 4.319237  | -3.019629 | 2.291116  |
| 6                                | -3.058383 | 2.493434  | 0.128708  | 1  | 3.070707  | -3.183317 | 4.040545  |
| 6                                | -3.262372 | 2.312264  | 1.495096  | 1  | 5.368379  | -2.614209 | 0.451764  |
| 6                                | -4.136236 | 2.557069  | -0.752567 | 1  | 4.958005  | -3.853092 | 2.567057  |
| 6                                | -4.561211 | 2.173338  | 1.977152  | 6  | 2.619237  | 1.985074  | 1.525048  |
| 1                                | -2.411795 | 2.283417  | 2.163450  | 6  | 2.465013  | 3.192843  | 0.831610  |
| 6                                | -5.430984 | 2.413166  | -0.256115 | 6  | 3.557185  | 1.896474  | 2.566810  |
| 1                                | -3.947305 | 2.717886  | -1.808216 | 6  | 3.237260  | 4.299326  | 1.183009  |
| 6                                | -5.662969 | 2.206849  | 1.110004  | 1  | 1.730422  | 3.273214  | 0.043211  |
| 1                                | -4.723456 | 2.032323  | 3.042913  | 6  | 4.324642  | 3.006646  | 2.912698  |
| 1                                | -6.275002 | 2.458794  | -0.939150 | 1  | 3.690302  | 0.960893  | 3.099470  |
| 6                                | -7.061895 | 1.991566  | 1.630965  | 6  | 4.166422  | 4.209290  | 2.219156  |
| 1                                | -7.157061 | 2.316566  | 2.671051  | 1  | 3.113060  | 5.226441  | 0.633548  |
| 1                                | -7.331811 | 0.928627  | 1.593035  | 1  | 5.048183  | 2.931801  | 3.719175  |
| 1                                | -7.799923 | 2.535114  | 1.034240  | 1  | 4.769883  | 5.072109  | 2.486192  |
| 6                                | 1.174756  | 1.177589  | -2.604971 | 6  | -0.552722 | -1.686171 | 1.105670  |
| 6                                | 0.420715  | 0.252004  | -2.983341 | 8  | -0.941494 | -2.914966 | 1.517333  |
| 6                                | -0.297594 | -0.559253 | -4.002397 | 6  | -0.030961 | -2.953396 | -0.669121 |
| 1                                | 0.154741  | -0.371388 | -4.981814 | 6  | -0.539770 | -3.860665 | 0.489155  |
| 1                                | -0.191391 | -1.626524 | -3.777916 | 7  | -0.066374 | -1.595818 | -0.082239 |
| 8                                | -1.669999 | -0.223591 | -4.165940 | 6  | 0.654735  | -4.721504 | 0.960097  |
| 6                                | -2.453882 | -0.357783 | -3.002036 | 1  | 0.965796  | -4.399334 | 1.960138  |
| 1                                | -3.432615 | 0.082837  | -3.226861 | 1  | 0.391289  | -5.782256 | 1.025710  |
| 1                                | -2.026583 | 0.211377  | -2.168908 | 6  | 1.733912  | -4.458527 | -0.065797 |
| 6                                | -2.660905 | -1.801683 | -2.570028 | 6  | 2.970543  | -5.088320 | -0.192986 |
| 8                                | -2.231079 | -2.732645 | -3.242004 | 6  | 1.358185  | -3.460439 | -0.968577 |

|                                  |           |           |           |    |           |           |           |
|----------------------------------|-----------|-----------|-----------|----|-----------|-----------|-----------|
| 6                                | 3.824753  | -4.703886 | -1.228582 | 6  | 4.292389  | 1.899446  | -0.209226 |
| 1                                | 3.267760  | -5.868092 | 0.502464  | 6  | 5.116702  | 1.735246  | -2.485070 |
| 6                                | 2.204083  | -3.077023 | -2.007262 | 6  | 5.414854  | 1.199715  | 0.236670  |
| 6                                | 3.446192  | -3.702918 | -2.129276 | 1  | 3.546519  | 2.196564  | 0.519992  |
| 1                                | 4.789555  | -5.190410 | -1.338862 | 6  | 6.235184  | 1.042365  | -2.035027 |
| 1                                | 1.899499  | -2.308529 | -2.709157 | 1  | 4.972427  | 1.959627  | -3.536809 |
| 1                                | 4.116085  | -3.419939 | -2.935655 | 6  | 6.382792  | 0.768990  | -0.670100 |
| 1                                | -1.424754 | -4.442346 | 0.235440  | 1  | 5.514735  | 0.981586  | 1.294663  |
| 1                                | -0.669501 | -2.973517 | -1.552040 | 1  | 6.992754  | 0.714547  | -2.741091 |
| 6                                | 2.061403  | 2.310982  | -2.551910 | 1  | 7.252698  | 0.221883  | -0.317717 |
| 6                                | 1.555982  | 3.615766  | -2.683978 | 1  | -1.115262 | 1.450191  | -2.079898 |
| 6                                | 3.436256  | 2.116706  | -2.326854 | 6  | -0.113879 | -2.333075 | 0.238155  |
| 6                                | 2.425569  | 4.702262  | -2.598228 | 6  | -0.731945 | -2.123173 | 1.489857  |
| 1                                | 0.488414  | 3.753217  | -2.807308 | 6  | -0.329727 | -2.880977 | 2.595249  |
| 6                                | 4.293641  | 3.208399  | -2.250043 | 6  | 0.685188  | -3.826158 | 2.473992  |
| 1                                | 3.812593  | 1.106697  | -2.200731 | 6  | 1.297552  | -4.033025 | 1.241155  |
| 6                                | 3.791012  | 4.505388  | -2.384955 | 6  | 0.894401  | -3.291244 | 0.130027  |
| 1                                | 2.029197  | 5.708804  | -2.692738 | 1  | -0.797402 | -2.695956 | 3.553977  |
| 1                                | 5.352964  | 3.050262  | -2.071861 | 1  | 1.009546  | -4.382958 | 3.346186  |
| 1                                | 4.460814  | 5.357261  | -2.315039 | 1  | 2.104241  | -4.751661 | 1.144812  |
|                                  |           |           |           | 1  | 1.384279  | -3.441084 | -0.825622 |
|                                  |           |           |           | 15 | -0.667990 | -1.369576 | -1.216343 |
| <b>IM6</b>                       |           |           |           | 6  | -2.138437 | -2.308780 | -1.768410 |
| SCF Energy = -3424.921086        |           |           |           | 6  | -2.191236 | -3.710504 | -1.737097 |
| Gibbs Free Energy = -3424.178751 |           |           |           | 6  | -3.271501 | -1.586973 | -2.166841 |
|                                  |           |           |           | 6  | -3.354587 | -4.376237 | -2.119284 |
| 28                               | -1.124895 | 0.663076  | -0.474258 | 1  | -1.328853 | -4.276009 | -1.398174 |
| 8                                | 2.267753  | 1.842081  | 2.194422  | 6  | -4.437481 | -2.254573 | -2.540798 |
| 16                               | 1.514141  | 0.601551  | 1.889895  | 1  | -3.250194 | -0.502708 | -2.151050 |
| 8                                | 0.351727  | 0.363688  | 2.788898  | 6  | -4.478238 | -3.648899 | -2.520908 |
| 8                                | 1.175787  | 0.486768  | 0.424580  | 1  | -3.388694 | -5.461311 | -2.093923 |
| 6                                | 2.628557  | -0.779050 | 2.184743  | 1  | -5.313420 | -1.681510 | -2.824759 |
| 6                                | 3.400913  | -1.297159 | 1.147568  | 1  | -5.386901 | -4.170341 | -2.806831 |
| 6                                | 2.741217  | -1.302204 | 3.473252  | 6  | 0.633040  | -1.602188 | -2.471716 |
| 6                                | 4.291954  | -2.337823 | 1.405222  | 6  | 1.783745  | -0.800011 | -2.364595 |
| 1                                | 3.293131  | -0.898199 | 0.147668  | 6  | 0.517355  | -2.518004 | -3.525464 |
| 6                                | 3.632072  | -2.343780 | 3.718632  | 6  | 2.810733  | -0.933470 | -3.296302 |
| 1                                | 2.113797  | -0.902741 | 4.262285  | 1  | 1.867688  | -0.091894 | -1.545965 |
| 6                                | 4.423623  | -2.875515 | 2.690736  | 6  | 1.548072  | -2.638702 | -4.459020 |
| 1                                | 4.890168  | -2.741075 | 0.591971  | 1  | -0.373304 | -3.129668 | -3.620142 |
| 1                                | 3.713159  | -2.755692 | 4.721657  | 6  | 2.693983  | -1.851232 | -4.343179 |
| 6                                | 5.405767  | -3.986350 | 2.970889  | 1  | 3.696000  | -0.314345 | -3.202565 |
| 1                                | 5.010510  | -4.695251 | 3.705386  | 1  | 1.452482  | -3.347212 | -5.276488 |
| 1                                | 5.653094  | -4.540853 | 2.060968  | 1  | 3.493469  | -1.946822 | -5.071894 |
| 1                                | 6.344629  | -3.590939 | 3.377855  | 6  | -1.800693 | -1.132304 | 1.688017  |
| 6                                | -1.223007 | 2.510147  | -0.285184 | 8  | -2.626963 | -1.371952 | 2.725376  |
| 6                                | -0.888825 | 2.444812  | -1.571790 | 6  | -3.258036 | 0.586800  | 1.556199  |
| 6                                | -0.055082 | 3.346592  | -2.463794 | 6  | -3.691613 | -0.384408 | 2.688512  |
| 1                                | -0.703495 | 4.059969  | -2.984988 | 7  | -2.067128 | -0.078980 | 0.988481  |
| 1                                | 0.451779  | 2.743102  | -3.224025 | 6  | -5.029386 | -1.030455 | 2.257453  |
| 8                                | 0.869280  | 4.138474  | -1.743840 | 1  | -4.892845 | -2.110109 | 2.133776  |
| 6                                | 1.910260  | 3.407553  | -1.124480 | 1  | -5.804494 | -0.889609 | 3.018436  |
| 1                                | 2.404887  | 4.097004  | -0.433135 | 6  | -5.384539 | -0.339672 | 0.958924  |
| 1                                | 1.530248  | 2.574739  | -0.516683 | 6  | -6.514463 | -0.526660 | 0.164155  |
| 6                                | 2.935111  | 2.868624  | -2.121322 | 6  | -4.417085 | 0.599425  | 0.591306  |
| 8                                | 2.772968  | 2.993276  | -3.327942 | 6  | -6.662607 | 0.239495  | -0.994829 |
| 6                                | 4.133668  | 2.162060  | -1.576565 |    |           |           |           |

|                                  |           |           |           |    |           |           |           |
|----------------------------------|-----------|-----------|-----------|----|-----------|-----------|-----------|
| 1                                | -7.272286 | -1.254284 | 0.440605  | 6  | -1.019974 | -4.690357 | -0.374699 |
| 6                                | -4.565713 | 1.377907  | -0.554792 | 6  | -2.646312 | -3.730262 | 1.679910  |
| 6                                | -5.697906 | 1.188986  | -1.350692 | 1  | -2.918199 | -1.987674 | 0.470283  |
| 1                                | -7.540878 | 0.104719  | -1.619448 | 6  | -1.217016 | -5.458630 | 0.768344  |
| 1                                | -3.810233 | 2.109074  | -0.822190 | 1  | -0.396843 | -5.041137 | -1.190083 |
| 1                                | -5.833332 | 1.786330  | -2.247254 | 6  | -2.035367 | -4.979133 | 1.797319  |
| 1                                | -3.731161 | 0.072499  | 3.677065  | 1  | -3.267386 | -3.343247 | 2.481070  |
| 1                                | -2.965200 | 1.580684  | 1.900349  | 1  | -0.740461 | -6.430261 | 0.859461  |
| 6                                | -1.290240 | 3.555070  | 0.707489  | 1  | -2.190596 | -5.578553 | 2.689951  |
| 6                                | -1.632660 | 4.872506  | 0.342096  | 1  | -0.327335 | 2.158366  | -0.840648 |
| 6                                | -1.009596 | 3.266933  | 2.057323  | 6  | 1.107252  | -0.422494 | 2.252835  |
| 6                                | -1.694393 | 5.874939  | 1.302830  | 6  | 1.086422  | -1.700291 | 1.650656  |
| 1                                | -1.841441 | 5.095525  | -0.698791 | 6  | 0.662015  | -2.814702 | 2.375592  |
| 6                                | -1.060085 | 4.280738  | 3.010987  | 6  | 0.208746  | -2.660311 | 3.685027  |
| 1                                | -0.717840 | 2.261226  | 2.342529  | 6  | 0.205062  | -1.399277 | 4.273934  |
| 6                                | -1.406859 | 5.581138  | 2.639936  | 6  | 0.664225  | -0.285990 | 3.564442  |
| 1                                | -1.957725 | 6.887633  | 1.012325  | 1  | 0.649541  | -3.785622 | 1.896918  |
| 1                                | -0.818167 | 4.053171  | 4.044504  | 1  | -0.152733 | -3.524726 | 4.232283  |
| 1                                | -1.448844 | 6.367727  | 3.387822  | 1  | -0.164633 | -1.269508 | 5.286036  |
|                                  |           |           |           | 1  | 0.640940  | 0.694084  | 4.023495  |
|                                  |           |           |           | 15 | 1.638227  | 1.016269  | 1.249638  |
| <b>IM7</b>                       |           |           |           | 6  | 3.434255  | 0.724739  | 1.009497  |
| SCF Energy = -3424.916349        |           |           |           | 6  | 4.151689  | -0.246941 | 1.718049  |
| Gibbs Free Energy = -3424.171971 |           |           |           | 6  | 4.100846  | 1.512580  | 0.059995  |
| 28                               | 0.516852  | 0.641496  | -0.675933 | 6  | 5.515779  | -0.427800 | 1.477650  |
| 8                                | -2.128800 | 2.372670  | 0.805342  | 1  | 3.647340  | -0.861559 | 2.455502  |
| 16                               | -2.245055 | 1.016386  | 1.412310  | 6  | 5.463942  | 1.343827  | -0.163658 |
| 8                                | -2.119652 | 0.968581  | 2.884777  | 1  | 3.545166  | 2.248757  | -0.512982 |
| 8                                | -1.354928 | 0.017038  | 0.711881  | 6  | 6.173250  | 0.368539  | 0.540681  |
| 6                                | -3.891230 | 0.432743  | 1.001246  | 1  | 6.063046  | -1.185957 | 2.030218  |
| 6                                | -4.563584 | -0.411919 | 1.882781  | 1  | 5.966260  | 1.952447  | -0.907219 |
| 6                                | -4.427827 | 0.720787  | -0.254825 | 1  | 7.233412  | 0.227187  | 0.353739  |
| 6                                | -5.772467 | -0.988129 | 1.493376  | 6  | 1.579227  | 2.455963  | 2.368323  |
| 1                                | -4.128934 | -0.605681 | 2.857652  | 6  | 0.450595  | 3.287682  | 2.361879  |
| 6                                | -5.635389 | 0.138091  | -0.631028 | 6  | 2.640440  | 2.723258  | 3.248705  |
| 1                                | -3.900824 | 1.393607  | -0.922429 | 6  | 0.388178  | 4.371852  | 3.238656  |
| 6                                | -6.322753 | -0.728319 | 0.231762  | 1  | -0.389110 | 3.080920  | 1.705042  |
| 1                                | -6.297340 | -1.650595 | 2.177114  | 6  | 2.570011  | 3.810841  | 4.115931  |
| 1                                | -6.052410 | 0.357638  | -1.610722 | 1  | 3.517711  | 2.085137  | 3.251766  |
| 6                                | -7.641090 | -1.336673 | -0.178367 | 6  | 1.442677  | 4.636482  | 4.111981  |
| 1                                | -7.839162 | -2.265014 | 0.365057  | 1  | -0.494639 | 5.003406  | 3.236838  |
| 1                                | -7.662791 | -1.557621 | -1.249873 | 1  | 3.393958  | 4.014068  | 4.793547  |
| 1                                | -8.472897 | -0.652001 | 0.028667  | 1  | 1.388937  | 5.483099  | 4.790257  |
| 6                                | -0.782333 | 1.848258  | -1.853278 | 6  | 1.511953  | -1.885799 | 0.258478  |
| 6                                | -0.437750 | 0.645956  | -2.274222 | 8  | 2.139292  | -3.039340 | -0.030511 |
| 6                                | -0.865405 | -0.172351 | -3.446416 | 6  | 1.999151  | -1.628265 | -1.928536 |
| 1                                | -1.016050 | 0.480235  | -4.315175 | 6  | 2.605451  | -2.958284 | -1.409078 |
| 1                                | -0.115219 | -0.919767 | -3.713174 | 7  | 1.371188  | -1.051473 | -0.722194 |
| 8                                | -2.129312 | -0.818026 | -3.248152 | 6  | 4.143524  | -2.820592 | -1.476402 |
| 6                                | -2.303836 | -1.444652 | -1.992615 | 1  | 4.552017  | -2.772013 | -0.460715 |
| 1                                | -3.358969 | -1.732134 | -1.937905 | 1  | 4.606967  | -3.678187 | -1.974498 |
| 1                                | -2.115202 | -0.752837 | -1.159843 | 6  | 4.370062  | -1.523711 | -2.223345 |
| 6                                | -1.441088 | -2.677322 | -1.772435 | 6  | 5.573665  | -0.989453 | -2.678895 |
| 8                                | -0.608983 | -3.038863 | -2.599245 | 6  | 3.171699  | -0.841925 | -2.451531 |
| 6                                | -1.646113 | -3.441161 | -0.505833 | 6  | 5.560341  | 0.232849  | -3.354989 |
| 6                                | -2.457692 | -2.962816 | 0.532680  | 1  | 6.510412  | -1.513494 | -2.512018 |



|   |           |           |           |   |           |           |           |
|---|-----------|-----------|-----------|---|-----------|-----------|-----------|
| 6 | 3.151789  | 0.381954  | -3.116398 | 6 | 3.426164  | -3.111964 | 1.199476  |
| 6 | 4.359632  | 0.918579  | -3.567045 | 1 | 3.525499  | -1.395843 | 2.502515  |
| 1 | 6.492345  | 0.655551  | -3.718757 | 1 | 3.056171  | -4.700492 | -0.210859 |
| 1 | 2.213380  | 0.904060  | -3.275811 | 1 | 4.426636  | -3.454900 | 1.442038  |
| 1 | 4.365762  | 1.868292  | -4.093341 | 6 | -3.605274 | -0.727713 | 1.582558  |
| 1 | 2.218411  | -3.837444 | -1.922175 | 8 | -4.936417 | -0.611301 | 1.775832  |
| 1 | 1.221645  | -1.789755 | -2.671582 | 6 | -4.074518 | 1.141125  | 0.425765  |
| 6 | -1.706359 | 2.888879  | -2.305744 | 6 | -5.386549 | 0.558136  | 1.028980  |
| 6 | -2.752894 | 2.563085  | -3.187453 | 7 | -3.039799 | 0.185141  | 0.880991  |
| 6 | -1.582460 | 4.207380  | -1.844891 | 6 | -6.294891 | 0.135353  | -0.146574 |
| 6 | -3.633086 | 3.553195  | -3.618445 | 1 | -6.560925 | -0.922405 | -0.051375 |
| 1 | -2.897092 | 1.530593  | -3.487655 | 1 | -7.231994 | 0.703670  | -0.138721 |
| 6 | -2.463138 | 5.191611  | -2.282669 | 6 | -5.480151 | 0.434402  | -1.386334 |
| 1 | -0.800807 | 4.448914  | -1.131015 | 6 | -5.811042 | 0.186635  | -2.718192 |
| 6 | -3.488244 | 4.869453  | -3.175141 | 6 | -4.272658 | 1.062558  | -1.070015 |
| 1 | -4.443553 | 3.292412  | -4.292796 | 6 | -4.922432 | 0.580153  | -3.722401 |
| 1 | -2.358423 | 6.209113  | -1.918326 | 1 | -6.746496 | -0.302670 | -2.974993 |
| 1 | -4.180104 | 5.636515  | -3.509674 | 6 | -3.392519 | 1.478397  | -2.067324 |

### IM8B

SCF Energy = -3351.135113

Gibbs Free Energy = -3350.358214

|    |           |           |           |    |           |           |           |
|----|-----------|-----------|-----------|----|-----------|-----------|-----------|
| 28 | -1.180501 | 0.521560  | 0.198817  | 1  | -3.788664 | 2.131003  | 0.786003  |
| 6  | 0.201998  | 1.040166  | -1.034187 | 6  | 1.228280  | 0.126586  | -1.648164 |
| 6  | 0.128669  | 2.332994  | -1.407813 | 1  | 0.919603  | -0.927367 | -1.634116 |
| 1  | -0.581584 | 2.948746  | -0.862787 | 1  | 1.413923  | 0.373139  | -2.704875 |
| 6  | -1.684312 | -2.335076 | 1.769343  | 8  | 2.442082  | 0.265456  | -0.907477 |
| 6  | -2.944542 | -1.875667 | 2.209799  | 6  | 3.441814  | -0.599555 | -1.353371 |
| 6  | -3.595096 | -2.507600 | 3.276886  | 1  | 3.096922  | -1.643404 | -1.343759 |
| 6  | -3.000077 | -3.582442 | 3.931062  | 1  | 3.747879  | -0.372274 | -2.392808 |
| 6  | -1.750535 | -4.033422 | 3.513638  | 6  | 4.668010  | -0.471915 | -0.462407 |
| 6  | -1.103217 | -3.415537 | 2.442107  | 8  | 4.772658  | 0.425647  | 0.356365  |
| 1  | -4.562521 | -2.135891 | 3.592489  | 6  | 5.746627  | -1.497823 | -0.619815 |
| 1  | -3.507231 | -4.057247 | 4.764603  | 6  | 6.841237  | -1.434376 | 0.253974  |
| 1  | -1.271248 | -4.865787 | 4.019546  | 6  | 5.690634  | -2.522580 | -1.575614 |
| 1  | -0.130899 | -3.777799 | 2.132734  | 6  | 7.857198  | -2.381970 | 0.181395  |
| 15 | -0.837399 | -1.601859 | 0.293086  | 1  | 6.863392  | -0.633006 | 0.984395  |
| 6  | -1.578011 | -2.532307 | -1.096578 | 6  | 6.711694  | -3.468044 | -1.652320 |
| 6  | -1.878949 | -3.900651 | -1.026769 | 1  | 4.852463  | -2.591694 | -2.260074 |
| 6  | -1.917473 | -1.806948 | -2.247707 | 6  | 7.793660  | -3.401760 | -0.772391 |
| 6  | -2.491623 | -4.536266 | -2.105420 | 1  | 8.698904  | -2.328829 | 0.865172  |
| 1  | -1.652746 | -4.461119 | -0.125209 | 1  | 6.662609  | -4.257502 | -2.396025 |
| 6  | -2.541276 | -2.443892 | -3.319589 | 1  | 8.585715  | -4.142425 | -0.829997 |
| 1  | -1.715800 | -0.741800 | -2.285577 | 8  | -1.439578 | 2.399417  | 1.000134  |
| 6  | -2.823576 | -3.808631 | -3.251486 | 16 | -0.652947 | 2.453078  | 2.334582  |
| 1  | -2.722311 | -5.595743 | -2.047260 | 8  | -0.275888 | 1.074899  | 2.751104  |
| 1  | -2.821582 | -1.866159 | -4.194256 | 8  | -1.368501 | 3.286987  | 3.311201  |
| 1  | -3.313387 | -4.304766 | -4.084064 | 6  | 0.862799  | 3.298423  | 1.900297  |
| 6  | 0.865313  | -2.207601 | 0.548587  | 6  | 1.955760  | 2.573761  | 1.425534  |
| 6  | 1.642389  | -1.498863 | 1.477672  | 6  | 0.907424  | 4.689966  | 1.970747  |
| 6  | 1.377264  | -3.359572 | -0.062640 | 6  | 3.100697  | 3.251436  | 1.017433  |
| 6  | 2.919149  | -1.956719 | 1.799546  | 1  | 1.916205  | 1.496425  | 1.351939  |
| 1  | 1.240445  | -0.603094 | 1.944623  | 6  | 2.056848  | 5.357572  | 1.549506  |
| 6  | 2.656905  | -3.810839 | 0.266672  | 1  | 0.053078  | 5.231447  | 2.361469  |
| 1  | 0.780711  | -3.900162 | -0.789928 | 6  | 3.163716  | 4.650673  | 1.061223  |

|   |           |          |           |    |           |           |           |
|---|-----------|----------|-----------|----|-----------|-----------|-----------|
| 1 | 3.941862  | 2.669486 | 0.654771  | 1  | 7.593432  | -4.235234 | 1.489867  |
| 1 | 2.096076  | 6.442555 | 1.602724  | 1  | 9.679544  | -2.885783 | 1.498061  |
| 6 | 4.389039  | 5.373916 | 0.560143  | 1  | 1.622830  | -0.282079 | 0.297765  |
| 1 | 5.307323  | 4.878355 | 0.890700  | 6  | -3.851045 | -0.905820 | 0.786577  |
| 1 | 4.415095  | 6.410811 | 0.907056  | 6  | -4.182638 | -1.494554 | -0.454992 |
| 1 | 4.408918  | 5.390737 | -0.536698 | 6  | -5.514697 | -1.822671 | -0.739938 |
| 6 | 0.859832  | 3.134556 | -2.494725 | 6  | -6.524003 | -1.559685 | 0.182364  |
| 6 | 0.196467  | 2.842639 | -3.858328 | 6  | -6.203603 | -0.981863 | 1.408334  |
| 1 | 0.649977  | 3.450200 | -4.651024 | 6  | -4.877252 | -0.665059 | 1.706159  |
| 1 | 0.304472  | 1.788365 | -4.133543 | 1  | -5.746837 | -2.280500 | -1.693806 |
| 1 | -0.874223 | 3.074261 | -3.828015 | 1  | -7.552872 | -1.807849 | -0.057206 |
| 6 | 2.379478  | 2.882317 | -2.583598 | 1  | -6.980857 | -0.777310 | 2.138158  |
| 1 | 2.837498  | 3.649208 | -3.219509 | 1  | -4.639199 | -0.218374 | 2.663882  |
| 1 | 2.837557  | 2.926892 | -1.594838 | 15 | -2.090254 | -0.545341 | 1.213013  |
| 1 | 2.623216  | 1.912628 | -3.021667 | 6  | -1.500748 | -2.159643 | 1.839727  |
| 6 | 0.660064  | 4.626273 | -2.151448 | 6  | -2.269411 | -2.924678 | 2.729947  |
| 1 | 1.111412  | 4.862627 | -1.183096 | 6  | -0.267118 | -2.647367 | 1.392657  |
| 1 | 1.119655  | 5.265592 | -2.913419 | 6  | -1.801510 | -4.160734 | 3.169230  |
| 1 | -0.404843 | 4.877182 | -2.094651 | 1  | -3.232313 | -2.557475 | 3.070782  |

### IM8

SCF Energy = -3424.946561

Gibbs Free Energy = -3424.201305

|    |           |           |           |   |           |           |           |
|----|-----------|-----------|-----------|---|-----------|-----------|-----------|
| 28 | -1.018375 | 0.074613  | -0.522187 | 1 | 0.195228  | -3.888990 | 1.829226  |
| 6  | -0.221545 | 4.358545  | 2.581864  | 1 | 0.323138  | -2.068165 | 0.694975  |
| 6  | 0.170179  | 3.084712  | 2.176712  | 6 | -0.569737 | -4.644296 | 2.717249  |
| 6  | -0.296893 | 2.528537  | 0.970694  | 1 | -2.399187 | -4.750358 | 3.857916  |
| 6  | -1.222990 | 3.274138  | 0.217171  | 1 | 1.143963  | -4.260172 | 1.457985  |
| 6  | -1.606291 | 4.551237  | 0.618066  | 1 | -0.212499 | -5.612585 | 3.055317  |
| 6  | -1.102989 | 5.104927  | 1.797564  | 6 | -2.207760 | 0.545874  | 2.665353  |
| 1  | 0.149085  | 4.762068  | 3.520233  | 6 | -2.914197 | 1.753620  | 2.549293  |
| 1  | 0.808234  | 2.489129  | 2.820508  | 6 | -1.522870 | 0.256454  | 3.850012  |
| 1  | -1.628746 | 2.852845  | -0.696082 | 6 | -2.952598 | 2.646329  | 3.615363  |
| 1  | -2.299623 | 5.116709  | 0.002316  | 1 | -3.417570 | 2.001136  | 1.621456  |
| 1  | -1.406715 | 6.099973  | 2.110485  | 6 | -1.557625 | 1.159847  | 4.913945  |
| 6  | 0.131325  | 1.195868  | 0.516606  | 1 | -0.964009 | -0.668296 | 3.940730  |
| 6  | 1.384829  | 0.719987  | 0.644373  | 6 | -2.274290 | 2.350184  | 4.799804  |
| 6  | 2.623034  | 1.474301  | 1.036232  | 1 | -3.486666 | 3.584276  | 3.509544  |
| 1  | 2.416615  | 2.534139  | 1.208851  | 1 | -1.023675 | 0.929783  | 5.831002  |
| 1  | 3.080653  | 1.054749  | 1.943335  | 1 | -2.295881 | 3.053035  | 5.627114  |
| 8  | 3.566345  | 1.387044  | -0.056256 | 6 | -3.167010 | -1.818399 | -1.470811 |
| 6  | 4.843225  | 0.935815  | 0.272241  | 8 | -3.515501 | -2.770910 | -2.359997 |
| 1  | 5.257794  | 1.450920  | 1.156530  | 6 | -1.310673 | -1.970876 | -2.739069 |
| 1  | 5.498471  | 1.182516  | -0.572359 | 6 | -2.353203 | -3.027846 | -3.203095 |
| 6  | 4.922025  | -0.575462 | 0.517692  | 7 | -1.997226 | -1.302146 | -1.601079 |
| 8  | 3.914317  | -1.266089 | 0.497744  | 6 | -1.767348 | -4.426554 | -2.908431 |
| 6  | 6.263302  | -1.176830 | 0.787922  | 6 | -2.429641 | -4.970583 | -2.226504 |
| 6  | 7.445661  | -0.421272 | 0.795508  | 1 | -1.692569 | -5.022139 | -3.825206 |
| 6  | 6.328876  | -2.555274 | 1.040955  | 6 | -0.403745 | -4.149347 | -2.314273 |
| 6  | 8.670180  | -1.036317 | 1.050628  | 6 | 0.541988  | -5.071782 | -1.868935 |
| 1  | 7.420683  | 0.645633  | 0.602382  | 6 | -0.120434 | -2.780763 | -2.279063 |
| 6  | 7.550829  | -3.167911 | 1.295444  | 6 | 1.769779  | -4.605151 | -1.392432 |
| 1  | 5.403377  | -3.120487 | 1.032954  | 1 | 0.330992  | -6.137492 | -1.894139 |
| 6  | 8.724443  | -2.408498 | 1.300258  | 6 | 1.114380  | -2.310436 | -1.831640 |
| 1  | 9.581064  | -0.445899 | 1.053421  | 6 | 2.058671  | -3.235617 | -1.378781 |
|    |           |           |           | 1 | 2.512638  | -5.315405 | -1.039667 |
|    |           |           |           | 1 | 1.326613  | -1.247614 | -1.840047 |
|    |           |           |           | 1 | 3.010155  | -2.880128 | -0.999077 |
|    |           |           |           | 1 | -2.683922 | -2.904185 | -4.234254 |
|    |           |           |           | 1 | -1.055503 | -1.215547 | -3.481796 |

|    |           |           |           |    |           |           |           |
|----|-----------|-----------|-----------|----|-----------|-----------|-----------|
| 8  | -2.019026 | 1.878593  | -2.806472 | 1  | 8.127620  | -2.278802 | -1.464881 |
| 16 | -0.596911 | 1.606793  | -3.132842 | 1  | -2.252580 | -0.595409 | -3.551511 |
| 8  | -0.295304 | 1.254974  | -4.530888 | 6  | -0.827012 | 2.360863  | 1.870909  |
| 8  | -0.004334 | 0.541046  | -2.189871 | 6  | -0.427169 | 1.473409  | 2.900716  |
| 6  | 0.302994  | 3.082737  | -2.660349 | 6  | -0.737324 | 1.766020  | 4.234607  |
| 6  | -0.290119 | 4.330847  | -2.848826 | 6  | -1.425790 | 2.930573  | 4.566138  |
| 6  | 1.531485  | 2.967958  | -2.013607 | 6  | -1.792613 | 3.822588  | 3.562246  |
| 6  | 0.340745  | 5.467045  | -2.350428 | 6  | -1.492298 | 3.537018  | 2.228453  |
| 1  | -1.256164 | 4.398226  | -3.337067 | 1  | -0.426077 | 1.070049  | 5.003749  |
| 6  | 2.145685  | 4.112657  | -1.511832 | 1  | -1.665666 | 3.139832  | 5.603574  |
| 1  | 1.974814  | 1.994813  | -1.853651 | 1  | -2.316397 | 4.741067  | 3.808420  |
| 6  | 1.552889  | 5.372613  | -1.652985 | 1  | -1.791286 | 4.234790  | 1.456202  |
| 1  | -0.128273 | 6.439638  | -2.475874 | 15 | -0.495556 | 1.967328  | 0.097735  |
| 1  | 3.086617  | 4.008403  | -0.978670 | 6  | 1.200059  | 2.592309  | -0.202910 |
| 6  | 2.169551  | 6.591971  | -1.015300 | 6  | 1.883739  | 3.383030  | 0.728115  |
| 1  | 3.255682  | 6.494035  | -0.927854 | 6  | 1.831414  | 2.232265  | -1.403787 |
| 1  | 1.769816  | 6.736617  | -0.003589 | 6  | 3.185116  | 3.808596  | 0.460415  |
| 1  | 1.952212  | 7.499990  | -1.586027 | 1  | 1.407002  | 3.658970  | 1.662459  |
|    |           |           |           | 6  | 3.125203  | 2.677116  | -1.674719 |
|    |           |           |           | 1  | 1.336569  | 1.571308  | -2.105307 |
|    |           |           |           | 6  | 3.804462  | 3.462548  | -0.741376 |
|    |           |           |           | 1  | 3.714646  | 4.409942  | 1.193139  |
|    |           |           |           | 1  | 3.599325  | 2.375814  | -2.602694 |
| 28 | -0.543912 | -0.168764 | -0.121735 | 1  | 4.817602  | 3.796509  | -0.944885 |
| 6  | -5.529395 | 0.747963  | -1.699642 | 6  | -1.585107 | 3.107465  | -0.831441 |
| 6  | -4.207204 | 0.529480  | -2.076734 | 6  | -2.964412 | 3.123422  | -0.568258 |
| 6  | -3.248466 | 0.082538  | -1.149171 | 6  | -1.073874 | 3.927802  | -1.846580 |
| 6  | -3.668484 | -0.118057 | 0.178903  | 6  | -3.810765 | 3.948636  | -1.304500 |
| 6  | -4.991827 | 0.097566  | 0.558068  | 1  | -3.381648 | 2.487745  | 0.202675  |
| 6  | -5.931254 | 0.534470  | -0.377931 | 6  | -1.927929 | 4.744442  | -2.587802 |
| 1  | -6.246152 | 1.103737  | -2.435032 | 1  | -0.011562 | 3.932768  | -2.059166 |
| 1  | -3.900364 | 0.743334  | -3.095306 | 6  | -3.296605 | 4.757766  | -2.318512 |
| 1  | -2.950956 | -0.469310 | 0.913428  | 1  | -4.875036 | 3.938231  | -1.093748 |
| 1  | -5.288936 | -0.085138 | 1.586385  | 1  | -1.518940 | 5.373560  | -3.372576 |
| 1  | -6.961635 | 0.710025  | -0.082290 | 1  | -3.959482 | 5.394829  | -2.896431 |
| 6  | -1.837791 | -0.163479 | -1.516365 | 6  | 0.381656  | 0.276521  | 2.630131  |
| 6  | -1.492311 | -0.489646 | -2.773448 | 8  | 0.900466  | -0.354792 | 3.695153  |
| 6  | -0.114523 | -0.845440 | -3.244096 | 6  | 1.690643  | -1.259616 | 1.698978  |
| 1  | -0.099906 | -1.900254 | -3.566780 | 6  | 1.533688  | -1.588595 | 3.198015  |
| 1  | 0.188560  | -0.241333 | -4.112442 | 7  | 0.692902  | -0.195030 | 1.469503  |
| 8  | 0.823556  | -0.668075 | -2.189701 | 6  | 2.940420  | -1.735294 | 3.783298  |
| 6  | 1.944623  | -1.505381 | -2.177727 | 1  | 3.002170  | -1.310716 | 4.790026  |
| 1  | 1.739315  | -2.473283 | -2.660843 | 1  | 3.188810  | -2.800707 | 3.865978  |
| 1  | 2.171983  | -1.720041 | -1.131611 | 6  | 3.822890  | -1.030830 | 2.774890  |
| 6  | 3.143855  | -0.839975 | -2.856080 | 6  | 5.160268  | -0.658679 | 2.891587  |
| 8  | 2.968249  | 0.089587  | -3.631892 | 6  | 3.112619  | -0.743061 | 1.602933  |
| 6  | 4.512873  | -1.310175 | -2.499659 | 6  | 5.772835  | 0.015676  | 1.830539  |
| 6  | 4.737545  | -2.410067 | -1.658427 | 1  | 5.718874  | -0.878865 | 3.797300  |
| 6  | 5.607633  | -0.574864 | -2.977823 | 6  | 3.709291  | -0.039207 | 0.562336  |
| 6  | 6.035474  | -2.759943 | -1.294249 | 6  | 5.048955  | 0.334698  | 0.678667  |
| 1  | 3.906824  | -2.991641 | -1.274690 | 1  | 6.815711  | 0.308433  | 1.910022  |
| 6  | 6.902588  | -0.920080 | -2.606913 | 1  | 3.137556  | 0.245554  | -0.310267 |
| 1  | 5.411349  | 0.268617  | -3.630637 | 1  | 5.524880  | 0.871887  | -0.134603 |
| 6  | 7.117389  | -2.011956 | -1.760504 | 1  | 0.841058  | -2.401461 | 3.411334  |
| 1  | 6.201275  | -3.607374 | -0.637008 | 1  | 1.477757  | -2.102127 | 1.041237  |
| 1  | 7.745490  | -0.341748 | -2.972987 | 8  | -1.392047 | -2.229956 | 2.220646  |

**IM9**

SCF Energy = -3424.958686

Gibbs Free Energy = -3424.210783

|    |           |           |           |
|----|-----------|-----------|-----------|
| 16 | -1.204881 | -3.019310 | 0.975276  |
| 8  | -0.538217 | -4.323879 | 1.135183  |
| 8  | -0.490084 | -2.207955 | -0.119037 |
| 6  | -2.850121 | -3.249188 | 0.307462  |
| 6  | -3.930309 | -3.344021 | 1.183518  |
| 6  | -3.050261 | -3.244944 | -1.071448 |
| 6  | -5.222822 | -3.390781 | 0.669065  |
| 1  | -3.753443 | -3.329240 | 2.253019  |
| 6  | -4.348689 | -3.283427 | -1.570889 |
| 1  | -2.199474 | -3.144129 | -1.732722 |
| 6  | -5.452764 | -3.332343 | -0.711515 |
| 1  | -6.069573 | -3.438585 | 1.348788  |
| 1  | -4.510331 | -3.238019 | -2.644531 |
| 6  | -6.854671 | -3.248420 | -1.257831 |
| 1  | -6.937092 | -3.733609 | -2.235077 |
| 1  | -7.143160 | -2.197643 | -1.386448 |
| 1  | -7.580101 | -3.711237 | -0.582373 |

**(S,R)-L1**

SCF Energy = -1551.730222

Gibbs Free Energy = -1551.364194

|    |           |           |           |
|----|-----------|-----------|-----------|
| 6  | 0.997896  | -1.509980 | -0.040291 |
| 6  | -0.188390 | -2.151777 | 0.400694  |
| 6  | -0.224640 | -3.542269 | 0.575535  |
| 6  | 0.905506  | -4.317334 | 0.341382  |
| 6  | 2.082632  | -3.698554 | -0.075698 |
| 6  | 2.121610  | -2.317897 | -0.267353 |
| 1  | -1.150982 | -3.999659 | 0.902769  |
| 1  | 0.867577  | -5.392452 | 0.485171  |
| 1  | 2.976275  | -4.288659 | -0.256152 |
| 1  | 3.043717  | -1.860378 | -0.603169 |
| 15 | 1.017084  | 0.304875  | -0.458710 |
| 6  | 2.716561  | 0.457377  | -1.186559 |
| 6  | 3.871557  | 0.776410  | -0.457992 |
| 6  | 2.830105  | 0.264028  | -2.572348 |
| 6  | 5.106333  | 0.889034  | -1.097916 |
| 1  | 3.803395  | 0.935154  | 0.612643  |
| 6  | 4.065004  | 0.363588  | -3.210967 |
| 1  | 1.939678  | 0.033327  | -3.151554 |
| 6  | 5.207589  | 0.678984  | -2.473687 |
| 1  | 5.991473  | 1.138504  | -0.519775 |
| 1  | 4.134626  | 0.205202  | -4.283163 |
| 1  | 6.169741  | 0.766301  | -2.969529 |
| 6  | 1.298244  | 1.098062  | 1.181044  |
| 6  | 1.123531  | 2.486213  | 1.259433  |
| 6  | 1.680227  | 0.399592  | 2.332221  |
| 6  | 1.332590  | 3.163699  | 2.459520  |
| 1  | 0.819211  | 3.037097  | 0.373276  |
| 6  | 1.881446  | 1.075271  | 3.536118  |
| 1  | 1.816299  | -0.675868 | 2.286875  |
| 6  | 1.710401  | 2.458420  | 3.603217  |
| 1  | 1.195227  | 4.240199  | 2.503856  |
| 1  | 2.174484  | 0.520108  | 4.422656  |
| 1  | 1.868454  | 2.983181  | 4.540637  |
| 6  | -1.398370 | -1.379895 | 0.696828  |

|   |           |           |           |
|---|-----------|-----------|-----------|
| 8 | -2.579124 | -2.074765 | 0.742662  |
| 6 | -2.847180 | 0.245799  | 1.062804  |
| 6 | -3.614071 | -1.115609 | 1.086787  |
| 7 | -1.434515 | -0.120933 | 0.910946  |
| 6 | -4.702535 | -1.056660 | -0.001069 |
| 1 | -4.675621 | -1.960108 | -0.618272 |
| 1 | -5.698390 | -1.008924 | 0.456368  |
| 6 | -4.392352 | 0.204258  | -0.777872 |
| 6 | -4.985602 | 0.665745  | -1.952178 |
| 6 | -3.377940 | 0.946314  | -0.167948 |
| 6 | -4.546637 | 1.869960  | -2.505881 |
| 1 | -5.774389 | 0.095625  | -2.435143 |
| 6 | -2.929587 | 2.142976  | -0.720256 |
| 6 | -3.523472 | 2.603884  | -1.895634 |
| 1 | -4.999169 | 2.237282  | -3.422088 |
| 1 | -2.119542 | 2.691538  | -0.249860 |
| 1 | -3.185861 | 3.533146  | -2.344183 |
| 1 | -4.003446 | -1.398709 | 2.067661  |
| 1 | -2.977151 | 0.841781  | 1.972105  |

**-OTS**

SCF Energy = -894.880104

Gibbs Free Energy = -894.787066

|    |           |           |           |
|----|-----------|-----------|-----------|
| 8  | -2.356089 | 1.254428  | -0.705066 |
| 16 | -1.986430 | -0.000003 | 0.004889  |
| 8  | -2.356050 | -1.253736 | -0.706320 |
| 8  | -2.310052 | -0.000735 | 1.456751  |
| 6  | -0.169144 | 0.000032  | -0.035590 |
| 6  | 0.535043  | -1.204202 | -0.026138 |
| 6  | 0.535050  | 1.204240  | -0.026142 |
| 6  | 1.928724  | -1.201495 | 0.001762  |
| 1  | -0.029087 | -2.130330 | -0.056015 |
| 6  | 1.928750  | 1.201513  | 0.001753  |
| 1  | -0.029096 | 2.130358  | -0.055995 |
| 6  | 2.648347  | 0.000013  | 0.016575  |
| 1  | 2.471081  | -2.145720 | 0.008758  |
| 1  | 2.471117  | 2.145732  | 0.008740  |
| 6  | 4.158624  | -0.000023 | 0.008524  |
| 1  | 4.562028  | -0.885043 | 0.512310  |
| 1  | 4.559950  | -0.000916 | -1.014227 |
| 1  | 4.562044  | 0.885843  | 0.510798  |

**(R)-IM10**

SCF Energy = -2529.94357

Gibbs Free Energy = -2529.314589

|    |           |          |           |
|----|-----------|----------|-----------|
| 28 | 0.337879  | 0.500562 | -0.494141 |
| 6  | 0.568177  | 1.647864 | 3.956006  |
| 6  | 0.820333  | 1.612335 | 2.586657  |
| 6  | 0.040162  | 2.360209 | 1.685571  |
| 6  | -0.998001 | 3.152616 | 2.204698  |
| 6  | -1.257552 | 3.178589 | 3.574536  |
| 6  | -0.481577 | 2.423609 | 4.455073  |
| 1  | 1.189023  | 1.070499 | 4.634986  |
| 1  | 1.635587  | 1.012899 | 2.199047  |

|    |           |           |           |    |           |           |           |
|----|-----------|-----------|-----------|----|-----------|-----------|-----------|
| 1  | -1.614098 | 3.728241  | 1.523687  | 1  | -3.716273 | 4.754007  | -1.044533 |
| 1  | -2.072787 | 3.787763  | 3.953179  | 1  | -5.264878 | 2.555711  | 2.312926  |
| 1  | -0.687594 | 2.443701  | 5.520604  | 1  | -5.218446 | 4.619133  | 0.931040  |
| 6  | 0.265340  | 2.250984  | 0.230834  | 6  | -0.394035 | -1.939746 | -2.046583 |
| 6  | 0.429790  | 3.314518  | -0.569236 | 8  | -0.122735 | -3.220333 | -2.345784 |
| 6  | 0.607921  | 3.195829  | -2.059745 | 6  | 1.410655  | -2.344490 | -0.760856 |
| 1  | 1.123139  | 4.076683  | -2.466861 | 6  | 0.941497  | -3.658820 | -1.451213 |
| 1  | -0.350614 | 3.115936  | -2.586354 | 7  | 0.397777  | -1.355118 | -1.210463 |
| 8  | 1.317682  | 2.005827  | -2.459621 | 6  | 0.387817  | -4.587169 | -0.346220 |
| 6  | 2.697237  | 2.050112  | -2.214425 | 1  | -0.700962 | -4.662017 | -0.444955 |
| 1  | 3.219339  | 1.686063  | -3.109758 | 1  | 0.791038  | -5.600916 | -0.427868 |
| 1  | 3.045505  | 3.075533  | -2.032388 | 6  | 0.783705  | -3.906688 | 0.943862  |
| 6  | 3.151165  | 1.178095  | -1.051967 | 6  | 0.658767  | -4.391809 | 2.244301  |
| 8  | 2.335718  | 0.521173  | -0.388059 | 6  | 1.352195  | -2.650531 | 0.716268  |
| 6  | 4.587136  | 1.071067  | -0.751349 | 6  | 1.104685  | -3.604626 | 3.308384  |
| 6  | 5.544733  | 1.848020  | -1.428868 | 1  | 0.225442  | -5.369907 | 2.430295  |
| 6  | 5.009017  | 0.167514  | 0.242040  | 6  | 1.798177  | -1.862282 | 1.774253  |
| 6  | 6.894254  | 1.723834  | -1.114805 | 6  | 1.668323  | -2.345930 | 3.076750  |
| 1  | 5.246378  | 2.553724  | -2.195842 | 1  | 1.016103  | -3.975993 | 4.324644  |
| 6  | 6.357862  | 0.044967  | 0.549253  | 1  | 2.235920  | -0.891762 | 1.581370  |
| 1  | 4.269059  | -0.432806 | 0.757569  | 1  | 2.011874  | -1.744668 | 3.912678  |
| 6  | 7.301822  | 0.823686  | -0.127532 | 1  | 1.699377  | -4.133504 | -2.073490 |
| 1  | 7.627974  | 2.328156  | -1.637346 | 1  | 2.394954  | -1.993221 | -1.080353 |
| 1  | 6.677854  | -0.654332 | 1.314576  |    |           |           |           |
| 1  | 8.355525  | 0.728867  | 0.114788  |    |           |           |           |
| 1  | 0.435636  | 4.326397  | -0.159063 |    |           |           |           |
| 6  | -2.335889 | -0.351245 | -2.039209 |    |           |           |           |
| 6  | -1.585821 | -1.362261 | -2.683220 |    |           |           |           |
| 6  | -2.007682 | -1.877538 | -3.913500 | 28 | -0.111413 | -0.268388 | -0.974826 |
| 6  | -3.152817 | -1.375033 | -4.529305 | 6  | -1.361756 | -2.694423 | 2.995105  |
| 6  | -3.894790 | -0.377327 | -3.900851 | 6  | -1.267747 | -2.703113 | 1.606306  |
| 6  | -3.494444 | 0.122318  | -2.658493 | 6  | -1.852251 | -1.681607 | 0.833295  |
| 1  | -1.432585 | -2.668611 | -4.380621 | 6  | -2.565551 | -0.671872 | 1.505255  |
| 1  | -3.466411 | -1.769143 | -5.490010 | 6  | -2.661288 | -0.667478 | 2.894053  |
| 1  | -4.794787 | 0.009277  | -4.367971 | 6  | -2.053466 | -1.672879 | 3.647675  |
| 1  | -4.092678 | 0.880757  | -2.168382 | 1  | -0.898090 | -3.492979 | 3.564762  |
| 15 | -1.798343 | 0.257533  | -0.391601 | 1  | -0.743336 | -3.521464 | 1.127539  |
| 6  | -2.188799 | -1.106178 | 0.756652  | 1  | -3.041864 | 0.112963  | 0.940464  |
| 6  | -1.645514 | -1.051293 | 2.049892  | 1  | -3.212786 | 0.126863  | 3.386527  |
| 6  | -2.982283 | -2.196243 | 0.377190  | 1  | -2.129598 | -1.668585 | 4.730239  |
| 6  | -1.909249 | -2.075800 | 2.954941  | 6  | -1.672541 | -1.663700 | -0.642053 |
| 1  | -1.019229 | -0.216224 | 2.345266  | 6  | -0.634492 | -2.346818 | -1.247311 |
| 6  | -3.224846 | -3.228313 | 1.284907  | 6  | -0.558278 | -2.622981 | -2.726693 |
| 1  | -3.410540 | -2.241844 | -0.618075 | 1  | -0.952039 | -3.647216 | -2.881894 |
| 6  | -2.691076 | -3.167710 | 2.572629  | 1  | 0.481969  | -2.623639 | -3.066366 |
| 1  | -1.485339 | -2.029654 | 3.951779  | 8  | -1.251443 | -1.693896 | -3.517485 |
| 1  | -3.839018 | -4.072590 | 0.987537  | 6  | -2.552110 | -1.445130 | -3.009754 |
| 1  | -2.883210 | -3.970457 | 3.277458  | 1  | -3.025686 | -0.742155 | -3.696465 |
| 6  | -2.936794 | 1.613539  | 0.019101  | 1  | -3.144823 | -2.373218 | -2.980455 |
| 6  | -2.912431 | 2.781556  | -0.759285 | 6  | -2.509421 | -0.792802 | -1.608856 |
| 6  | -3.792058 | 1.536647  | 1.124318  | 8  | -1.702281 | 0.359952  | -1.656969 |
| 6  | -3.737298 | 3.855133  | -0.436670 | 6  | -3.939923 | -0.515648 | -1.196716 |
| 1  | -2.250275 | 2.848438  | -1.614489 | 6  | -4.768387 | -1.548327 | -0.743805 |
| 6  | -4.609294 | 2.619663  | 1.450565  | 6  | -4.460947 | 0.774108  | -1.332439 |
| 1  | -3.811235 | 0.642626  | 1.736068  | 6  | -6.095095 | -1.288612 | -0.404771 |
| 6  | -4.582520 | 3.777822  | 0.674610  | 1  | -4.371294 | -2.553972 | -0.633960 |

**(R)-IM11**

SCF Energy = -2529.943866

Gibbs Free Energy = -2529.308565

|    |           |           |           |    |           |           |           |
|----|-----------|-----------|-----------|----|-----------|-----------|-----------|
| 6  | -5.788915 | 1.034383  | -0.990676 | 1  | -2.372390 | 1.861408  | 0.138450  |
| 1  | -3.816802 | 1.564952  | -1.699707 | 1  | -3.028842 | 2.802705  | 2.369713  |
| 6  | -6.607146 | 0.005459  | -0.522892 | 1  | 0.769008  | 4.412000  | -2.485853 |
| 1  | -6.727669 | -2.093913 | -0.044757 | 1  | -0.847113 | 2.564418  | -2.109983 |
| 1  | -6.184595 | 2.040152  | -1.093587 |    |           |           |           |
| 1  | -7.639251 | 0.208262  | -0.255276 |    |           |           |           |
| 1  | 0.006594  | -2.973892 | -0.641361 |    |           |           |           |
| 6  | 3.151952  | -0.377894 | -1.006467 |    |           |           |           |
| 6  | 3.070976  | 0.783733  | -1.807726 |    |           |           |           |
| 6  | 4.131823  | 1.126692  | -2.653454 | 28 | -0.179907 | -0.011618 | -0.483621 |
| 6  | 5.262823  | 0.314985  | -2.726623 | 6  | -1.304015 | 2.877448  | 2.358191  |
| 6  | 5.351896  | -0.823854 | -1.929265 | 6  | -1.640011 | 1.529955  | 2.269176  |
| 6  | 4.305753  | -1.162148 | -1.066365 | 6  | -2.522044 | 1.051978  | 1.281089  |
| 1  | 4.062949  | 2.029680  | -3.248256 | 6  | -3.018696 | 1.980392  | 0.347784  |
| 1  | 6.074352  | 0.580650  | -3.395405 | 6  | -2.685513 | 3.331419  | 0.438485  |
| 1  | 6.237717  | -1.449380 | -1.967650 | 6  | -1.836077 | 3.790581  | 1.447039  |
| 1  | 4.395161  | -2.038092 | -0.435485 | 1  | -0.618005 | 3.207919  | 3.130963  |
| 15 | 1.759244  | -0.766380 | 0.112126  | 1  | -1.197816 | 0.828420  | 2.966187  |
| 6  | 1.889679  | 0.429948  | 1.478425  | 1  | -3.688809 | 1.659814  | -0.436431 |
| 6  | 0.750630  | 0.659408  | 2.264520  | 1  | -3.104035 | 4.029486  | -0.280327 |
| 6  | 3.069330  | 1.144120  | 1.725113  | 1  | -1.584229 | 4.844338  | 1.515294  |
| 6  | 0.798985  | 1.590439  | 3.298326  | 6  | -2.884121 | -0.392308 | 1.286358  |
| 1  | -0.170396 | 0.124467  | 2.066336  | 6  | -2.942884 | -1.076269 | 2.442881  |
| 6  | 3.103656  | 2.087245  | 2.752654  | 6  | -3.064330 | -2.568782 | 2.519463  |
| 1  | 3.952203  | 0.970645  | 1.119068  | 1  | -4.091429 | -2.876812 | 2.782352  |
| 6  | 1.970757  | 2.310448  | 3.537533  | 1  | -2.401945 | -2.960330 | 3.298540  |
| 1  | -0.087731 | 1.771161  | 3.894702  | 8  | -2.668885 | -3.185084 | 1.302543  |
| 1  | 4.016348  | 2.643405  | 2.941733  | 6  | -3.406179 | -2.636787 | 0.228241  |
| 1  | 2.000383  | 3.048245  | 4.332871  | 1  | -3.143857 | -3.191718 | -0.673922 |
| 6  | 2.108435  | -2.409941 | 0.814384  | 1  | -4.480594 | -2.758906 | 0.421064  |
| 6  | 2.283557  | -3.514402 | -0.038654 | 6  | -3.115775 | -1.136470 | -0.025250 |
| 6  | 2.116065  | -2.602957 | 2.201511  | 8  | -1.902411 | -1.057876 | -0.829440 |
| 6  | 2.459420  | -4.790012 | 0.491726  | 6  | -4.308941 | -0.621847 | -0.829610 |
| 1  | 2.293517  | -3.376256 | -1.116028 | 6  | -5.466646 | -0.204598 | -0.158636 |
| 6  | 2.289769  | -3.884036 | 2.727171  | 6  | -4.310367 | -0.660385 | -2.227718 |
| 1  | 1.977070  | -1.759596 | 2.867376  | 6  | -6.589242 | 0.204245  | -0.873254 |
| 6  | 2.456643  | -4.977074 | 1.877280  | 1  | -5.475778 | -0.179546 | 0.926542  |
| 1  | 2.599854  | -5.636105 | -0.173142 | 6  | -5.436211 | -0.245429 | -2.943264 |
| 1  | 2.295663  | -4.024774 | 3.803236  | 1  | -3.442630 | -1.017860 | -2.771794 |
| 1  | 2.589939  | -5.971889 | 2.289716  | 6  | -6.575402 | 0.191201  | -2.270282 |
| 6  | 1.924817  | 1.699870  | -1.711466 | 1  | -7.473874 | 0.537109  | -0.339742 |
| 8  | 2.170474  | 2.971564  | -2.046934 | 1  | -5.419356 | -0.272375 | -4.028100 |
| 6  | -0.080260 | 2.689086  | -1.344202 | 1  | -7.448823 | 0.513984  | -2.827491 |
| 6  | 1.006384  | 3.756513  | -1.649320 | 1  | -2.863659 | -0.548254 | 3.389129  |
| 7  | 0.722602  | 1.431950  | -1.312227 | 6  | 1.838893  | 1.640670  | 1.388438  |
| 6  | 1.284538  | 4.515417  | -0.330169 | 6  | 1.627164  | 0.653228  | 2.374855  |
| 1  | 2.250683  | 4.196041  | 0.077723  | 6  | 1.847430  | 0.949718  | 3.723376  |
| 1  | 1.341720  | 5.596494  | -0.486098 | 6  | 2.242404  | 2.233619  | 4.100132  |
| 6  | 0.136786  | 4.115346  | 0.567768  | 6  | 2.444826  | 3.213530  | 3.128708  |
| 6  | -0.218084 | 4.649415  | 1.804629  | 6  | 2.252597  | 2.915180  | 1.776998  |
| 6  | -0.634331 | 3.098830  | -0.003499 | 1  | 1.701943  | 0.175619  | 4.468309  |
| 6  | -1.354642 | 4.158309  | 2.452951  | 1  | 2.398647  | 2.463102  | 5.148769  |
| 1  | 0.368808  | 5.444775  | 2.254273  | 1  | 2.761040  | 4.210278  | 3.418577  |
| 6  | -1.777673 | 2.619624  | 0.627786  | 1  | 2.422621  | 3.676531  | 1.024396  |
| 6  | -2.132868 | 3.154200  | 1.867110  | 15 | 1.589967  | 1.198550  | -0.365525 |
| 1  | -1.645959 | 4.574558  | 3.412529  | 6  | 3.033871  | 0.202019  | -0.833862 |

**(R)-IM12**

SCF Energy = -2606.402922

Gibbs Free Energy = -2605.746434

|    |           |           |           |    |           |           |           |
|----|-----------|-----------|-----------|----|-----------|-----------|-----------|
| 6  | 2.960210  | -0.527927 | -2.030678 | 6  | -2.203821 | -1.954587 | -2.467453 |
| 6  | 4.180110  | 0.127343  | -0.032045 | 1  | -2.623245 | -1.799536 | -3.469345 |
| 6  | 4.039412  | -1.312566 | -2.426859 | 1  | -2.522741 | -2.955824 | -2.135482 |
| 1  | 2.059601  | -0.488275 | -2.635152 | 6  | -2.847139 | -0.925471 | -1.546185 |
| 6  | 5.249755  | -0.676033 | -0.429201 | 8  | -2.161589 | -0.093231 | -0.930945 |
| 1  | 4.239756  | 0.691320  | 0.892506  | 6  | -4.310414 | -0.897311 | -1.399295 |
| 6  | 5.180737  | -1.391293 | -1.625385 | 6  | -5.144458 | -1.761352 | -2.132586 |
| 1  | 3.980118  | -1.879526 | -3.348698 | 6  | -4.885387 | 0.014421  | -0.493309 |
| 1  | 6.137903  | -0.735325 | 0.191847  | 6  | -6.524467 | -1.708529 | -1.964923 |
| 1  | 6.015233  | -2.013615 | -1.932484 | 1  | -4.726514 | -2.473663 | -2.834783 |
| 6  | 1.650920  | 2.746875  | -1.302761 | 6  | -6.263568 | 0.060598  | -0.328165 |
| 6  | 0.571292  | 3.638250  | -1.188532 | 1  | -4.238825 | 0.668384  | 0.079873  |
| 6  | 2.734133  | 3.058580  | -2.133632 | 6  | -7.084637 | -0.799167 | -1.064630 |
| 6  | 0.583305  | 4.835676  | -1.899233 | 1  | -7.163360 | -2.375254 | -2.534036 |
| 1  | -0.263820 | 3.401997  | -0.537354 | 1  | -6.701824 | 0.761666  | 0.374468  |
| 6  | 2.734905  | 4.258840  | -2.845637 | 1  | -8.161614 | -0.762009 | -0.934979 |
| 1  | 3.566357  | 2.369751  | -2.226126 | 1  | -0.006723 | -1.465493 | 1.798200  |
| 6  | 1.663444  | 5.145319  | -2.730494 | 6  | 2.626397  | 1.717379  | -1.204442 |
| 1  | -0.250887 | 5.524155  | -1.808192 | 6  | 1.866641  | 2.883543  | -1.450115 |
| 1  | 3.573359  | 4.499252  | -3.491178 | 6  | 2.480202  | 4.003578  | -2.034011 |
| 1  | 1.668262  | 6.075957  | -3.288767 | 6  | 3.826944  | 3.976759  | -2.381349 |
| 6  | 1.209836  | -0.703131 | 1.992866  | 6  | 4.581883  | 2.832209  | -2.132098 |
| 8  | 1.635673  | -1.705430 | 2.770554  | 6  | 3.983905  | 1.717830  | -1.544455 |
| 6  | 0.405036  | -2.517402 | 0.904418  | 1  | 1.888566  | 4.892767  | -2.212294 |
| 6  | 1.317642  | -2.958987 | 2.082640  | 1  | 4.283486  | 4.847509  | -2.839575 |
| 7  | 0.493318  | -1.031223 | 0.967597  | 1  | 5.635255  | 2.802946  | -2.391324 |
| 6  | 2.589455  | -3.591265 | 1.473335  | 1  | 4.581262  | 0.833467  | -1.357170 |
| 1  | 3.450997  | -2.941646 | 1.664973  | 15 | 1.906406  | 0.253574  | -0.348303 |
| 1  | 2.811943  | -4.562918 | 1.924451  | 6  | 2.361975  | 0.526401  | 1.395226  |
| 6  | 2.279999  | -3.697986 | -0.003452 | 6  | 3.688228  | 0.420248  | 1.838939  |
| 6  | 3.033981  | -4.321966 | -0.995127 | 6  | 1.361182  | 0.930233  | 2.288291  |
| 6  | 1.058723  | -3.098661 | -0.324548 | 6  | 4.000009  | 0.701600  | 3.167290  |
| 6  | 2.550914  | -4.333424 | -2.305824 | 1  | 4.472011  | 0.111721  | 1.155195  |
| 1  | 3.978933  | -4.799871 | -0.754700 | 6  | 1.679013  | 1.218159  | 3.614728  |
| 6  | 0.569389  | -3.108113 | -1.630115 | 1  | 0.336931  | 1.022147  | 1.949112  |
| 6  | 1.329842  | -3.729302 | -2.623010 | 6  | 2.997325  | 1.100697  | 4.055763  |
| 1  | 3.126043  | -4.824357 | -3.084906 | 1  | 5.025890  | 0.611363  | 3.509802  |
| 1  | -0.387676 | -2.654152 | -1.862469 | 1  | 0.893213  | 1.531728  | 4.294485  |
| 1  | 0.963888  | -3.755722 | -3.644577 | 1  | 3.247170  | 1.319626  | 5.089083  |
| 1  | 0.823692  | -3.596640 | 2.814672  | 6  | 2.892792  | -1.150075 | -0.961139 |
| 1  | -0.642528 | -2.803418 | 1.011411  | 6  | 3.135817  | -1.270912 | -2.338595 |
| 8  | -0.772353 | 0.701196  | -2.043101 | 6  | 3.256326  | -2.194946 | -0.101160 |
| 1  | -0.766906 | 1.664627  | -2.086609 | 6  | 3.757531  | -2.412140 | -2.842696 |
| 1  | -1.977815 | -0.360060 | -1.540727 | 1  | 2.837343  | -0.477918 | -3.016735 |
|    |           |           |           | 6  | 3.876258  | -3.335403 | -0.611392 |
|    |           |           |           | 1  | 3.039222  | -2.129472 | 0.958180  |
|    |           |           |           | 6  | 4.129145  | -3.445692 | -1.979874 |
|    |           |           |           | 1  | 3.945369  | -2.495793 | -3.908228 |
|    |           |           |           | 1  | 4.151588  | -4.139915 | 0.062694  |
|    |           |           |           | 1  | 4.610506  | -4.335043 | -2.373795 |
|    |           |           |           | 6  | 0.446881  | 3.010183  | -1.084811 |
|    |           |           |           | 8  | -0.008825 | 4.270328  | -0.991513 |
|    |           |           |           | 6  | -1.680312 | 2.710230  | -0.408957 |
|    |           |           |           | 6  | -1.423353 | 4.225304  | -0.639782 |
|    |           |           |           | 7  | -0.408545 | 2.071070  | -0.841670 |
|    |           |           |           | 6  | -1.665954 | 4.954495  | 0.691790  |
| 28 | -0.200378 | 0.127417  | -0.663230 |    |           |           |           |
| 6  | -0.002214 | -2.190484 | 0.983936  |    |           |           |           |
| 6  | -0.045098 | -1.719238 | -0.277653 |    |           |           |           |
| 6  | -0.096277 | -2.549863 | -1.525260 |    |           |           |           |
| 1  | -0.556029 | -3.535081 | -1.358495 |    |           |           |           |
| 1  | 0.901983  | -2.709296 | -1.941658 |    |           |           |           |
| 8  | -0.815601 | -1.865942 | -2.575897 |    |           |           |           |

**(R)-IM1A**

SCF Energy = -2529.936592

Gibbs Free Energy = -2529.307210

|    |           |           |           |    |           |           |           |
|----|-----------|-----------|-----------|----|-----------|-----------|-----------|
| 1  | -0.835142 | 5.630475  | 0.914870  | 6  | 3.126598  | 2.690819  | -2.798250 |
| 1  | -2.571798 | 5.568374  | 0.630815  | 6  | 4.363734  | 2.183327  | -3.188786 |
| 6  | -1.828711 | 3.841783  | 1.702348  | 6  | 4.782915  | 0.943304  | -2.712617 |
| 6  | -1.940893 | 3.950876  | 3.087758  | 6  | 3.967548  | 0.208977  | -1.847643 |
| 6  | -1.903209 | 2.588427  | 1.085286  | 1  | 2.791880  | 3.658305  | -3.152840 |
| 6  | -2.135849 | 2.794595  | 3.846914  | 1  | 4.995832  | 2.757090  | -3.857835 |
| 1  | -1.880434 | 4.920719  | 3.572471  | 1  | 5.747904  | 0.543206  | -3.006420 |
| 6  | -2.115418 | 1.432116  | 1.838536  | 1  | 4.313172  | -0.747656 | -1.475639 |
| 6  | -2.229826 | 1.544151  | 3.226427  | 15 | 1.674266  | -0.206434 | -0.236631 |
| 1  | -2.225146 | 2.868727  | 4.926203  | 6  | 2.072902  | 0.646304  | 1.324537  |
| 1  | -2.175986 | 0.461897  | 1.359473  | 6  | 3.407697  | 0.812496  | 1.727804  |
| 1  | -2.390449 | 0.653759  | 3.826143  | 6  | 1.040275  | 1.178346  | 2.106694  |
| 1  | -1.967490 | 4.655737  | -1.481743 | 6  | 3.698676  | 1.479364  | 2.914928  |
| 1  | -2.498761 | 2.300044  | -1.001125 | 1  | 4.214788  | 0.424259  | 1.114751  |
| 6  | 0.046874  | -3.592184 | 1.434492  | 6  | 1.336985  | 1.850444  | 3.293061  |
| 6  | -0.526223 | -3.929135 | 2.674482  | 1  | 0.009755  | 1.087813  | 1.785970  |
| 6  | 0.676831  | -4.611582 | 0.697546  | 6  | 2.663101  | 1.995838  | 3.699606  |
| 6  | -0.508880 | -5.239321 | 3.142518  | 1  | 4.731269  | 1.601979  | 3.225539  |
| 1  | -0.995742 | -3.148244 | 3.267259  | 1  | 0.528807  | 2.264331  | 3.885075  |
| 6  | 0.697599  | -5.924017 | 1.168757  | 1  | 2.893868  | 2.518299  | 4.622637  |
| 1  | 1.193592  | -4.371033 | -0.223584 | 6  | 2.432795  | -1.857958 | -0.168055 |
| 6  | 0.098938  | -6.245565 | 2.386958  | 6  | 2.454174  | -2.624931 | -1.346667 |
| 1  | -0.965194 | -5.477804 | 4.098449  | 6  | 2.983681  | -2.379184 | 1.006541  |
| 1  | 1.193397  | -6.695349 | 0.586823  | 6  | 3.020020  | -3.897002 | -1.343520 |
| 1  | 0.117149  | -7.267412 | 2.752378  | 1  | 2.050537  | -2.217051 | -2.269368 |
|    |           |           |           | 6  | 3.553935  | -3.652655 | 1.001522  |
|    |           |           |           | 1  | 2.954561  | -1.805594 | 1.924453  |
|    |           |           |           | 6  | 3.573071  | -4.411958 | -0.167192 |
|    |           |           |           | 1  | 3.037895  | -4.481145 | -2.257988 |
|    |           |           |           | 1  | 3.976096  | -4.051701 | 1.917909  |
| 28 | -0.442936 | 0.053167  | -0.861324 | 1  | 4.018665  | -5.401542 | -0.166059 |
| 6  | -1.315735 | -1.621632 | 0.453398  | 6  | 1.005315  | 2.532272  | -1.561469 |
| 6  | -1.556077 | -1.796837 | -0.883374 | 8  | 0.893466  | 3.861740  | -1.674381 |
| 6  | -1.019973 | -2.786887 | -1.882446 | 6  | -1.129803 | 2.897628  | -0.893258 |
| 1  | -1.592099 | -3.730966 | -1.811247 | 6  | -0.387743 | 4.246839  | -1.088659 |
| 1  | 0.038721  | -3.017361 | -1.778494 | 7  | -0.040836 | 1.906607  | -1.129268 |
| 8  | -1.243364 | -2.156960 | -3.135624 | 6  | -0.191198 | 4.868500  | 0.313944  |
| 6  | -2.543595 | -1.569073 | -3.035270 | 1  | 0.869072  | 4.828974  | 0.588230  |
| 1  | -2.645588 | -0.808309 | -3.808855 | 1  | -0.488263 | 5.921198  | 0.334638  |
| 1  | -3.315846 | -2.341612 | -3.157965 | 6  | -1.045107 | 4.011743  | 1.221532  |
| 6  | -2.621963 | -0.944744 | -1.615095 | 6  | -1.320182 | 4.199823  | 2.575315  |
| 8  | -2.086286 | 0.349232  | -1.585336 | 6  | -1.601199 | 2.926467  | 0.538211  |
| 6  | -4.012658 | -1.001750 | -1.009619 | 6  | -2.152224 | 3.287946  | 3.230856  |
| 6  | -4.545147 | -2.205521 | -0.532285 | 1  | -0.900249 | 5.043884  | 3.114359  |
| 6  | -4.789159 | 0.158662  | -0.948595 | 6  | -2.456028 | 2.029461  | 1.177798  |
| 6  | -5.829505 | -2.245979 | 0.007486  | 6  | -2.721074 | 2.212872  | 2.537038  |
| 1  | -3.953761 | -3.116749 | -0.574645 | 1  | -2.377082 | 3.427579  | 4.283817  |
| 6  | -6.076650 | 0.118808  | -0.410391 | 1  | -2.914712 | 1.223757  | 0.617905  |
| 1  | -4.373390 | 1.087758  | -1.321284 | 1  | -3.391123 | 1.531531  | 3.052172  |
| 6  | -6.598830 | -1.081736 | 0.070757  | 1  | -0.863308 | 4.921580  | -1.798867 |
| 1  | -6.229670 | -3.184066 | 0.379457  | 1  | -1.922902 | 2.687661  | -1.611186 |
| 1  | -6.670985 | 1.026437  | -0.368035 | 6  | -0.526697 | -2.450207 | 1.367477  |
| 1  | -7.598823 | -1.112677 | 0.491563  | 6  | -0.243000 | -1.945260 | 2.649642  |
| 1  | -1.914857 | -0.855098 | 0.944659  | 6  | -0.123082 | -3.760269 | 1.052929  |
| 6  | 2.715543  | 0.693428  | -1.460453 | 6  | 0.446004  | -2.714506 | 3.581814  |
| 6  | 2.295810  | 1.951050  | -1.947447 | 1  | -0.572454 | -0.945271 | 2.910519  |

**(R)-IM2A**

SCF Energy = -2529.941100

Gibbs Free Energy = -2529.307703



|   |           |           |          |    |          |           |           |
|---|-----------|-----------|----------|----|----------|-----------|-----------|
| 6 | 0.546538  | -4.535093 | 1.993835 | 1  | 5.666434 | 1.362026  | -3.176726 |
| 1 | -0.356154 | -4.188908 | 0.087077 | 1  | 4.496021 | -0.215465 | -1.691973 |
| 6 | 0.837730  | -4.014898 | 3.256943 | 15 | 1.883297 | -0.219443 | -0.384252 |
| 1 | 0.660098  | -2.308226 | 4.565006 | 6  | 2.523198 | 0.343075  | 1.228124  |
| 1 | 0.842175  | -5.547766 | 1.741465 | 6  | 3.859619 | 0.143242  | 1.604285  |
| 1 | 1.359235  | -4.624278 | 3.988209 | 6  | 1.663678 | 1.056166  | 2.074376  |

**(R)-IM5B**

SCF Energy = -2456.136579

Gibbs Free Energy = -2455.476128

|    |           |           |           |    |           |           |           |
|----|-----------|-----------|-----------|----|-----------|-----------|-----------|
| 28 | -0.236844 | -0.154561 | -0.573058 | 1  | 5.351407  | 0.468914  | 3.116494  |
| 6  | -0.283056 | -1.919816 | 1.599575  | 1  | 1.451036  | 2.097265  | 3.938548  |
| 6  | -0.303342 | -1.862790 | 0.260881  | 1  | 3.817749  | 1.711510  | 4.621690  |
| 6  | -0.477412 | -2.960038 | -0.750345 | 6  | 2.645991  | -1.831430 | -0.751111 |
| 1  | -1.097349 | -3.793261 | -0.403851 | 6  | 2.710351  | -2.268348 | -2.083434 |
| 1  | 0.490485  | -3.365392 | -1.053343 | 6  | 2.987615  | -2.713685 | 0.282029  |
| 8  | -1.051935 | -2.445027 | -1.974912 | 6  | 3.130593  | -3.564656 | -2.375975 |
| 6  | -2.442326 | -2.335353 | -1.950198 | 1  | 2.424358  | -1.600944 | -2.890000 |
| 1  | -2.790902 | -2.321762 | -2.990706 | 6  | 3.401640  | -4.011831 | -0.015445 |
| 1  | -2.909765 | -3.208024 | -1.466148 | 1  | 2.919508  | -2.391210 | 1.313527  |
| 6  | -2.983612 | -1.077768 | -1.279077 | 6  | 3.474383  | -4.439177 | -1.342648 |
| 8  | -2.221533 | -0.213696 | -0.819363 | 1  | 3.180750  | -3.893354 | -3.408949 |
| 6  | -4.437775 | -0.872045 | -1.188842 | 1  | 3.666411  | -4.688476 | 0.790858  |
| 6  | -5.350412 | -1.748737 | -1.803402 | 1  | 3.796307  | -5.450066 | -1.571240 |
| 6  | -4.921841 | 0.229772  | -0.458275 | 6  | 0.692730  | 2.503594  | -1.560858 |
| 6  | -6.718580 | -1.521283 | -1.693486 | 8  | 0.406988  | 3.814379  | -1.632558 |
| 1  | -5.002427 | -2.603771 | -2.371916 | 6  | -1.391866 | 2.588106  | -0.709262 |
| 6  | -6.288866 | 0.448582  | -0.347194 | 6  | -0.952091 | 4.015954  | -1.143370 |
| 1  | -4.214129 | 0.892852  | 0.025700  | 7  | -0.246418 | 1.732725  | -1.120652 |
| 6  | -7.188457 | -0.425010 | -0.966368 | 6  | -0.941299 | 4.908481  | 0.110513  |
| 1  | -7.418579 | -2.197276 | -2.172728 | 1  | 0.010630  | 5.442110  | 0.189163  |
| 1  | -6.657901 | 1.295298  | 0.222141  | 1  | -1.729900 | 5.666846  | 0.048583  |
| 1  | -8.256561 | -0.252574 | -0.879931 | 6  | -1.193558 | 3.952750  | 1.254653  |
| 1  | -0.101055 | -0.973998 | 2.113691  | 6  | -1.166534 | 4.225211  | 2.621947  |
| 6  | -0.443362 | -3.043560 | 2.617056  | 6  | -1.521853 | 2.671944  | 0.798195  |
| 6  | -0.602642 | -4.447703 | 2.019113  | 6  | -1.479299 | 3.205684  | 3.524672  |
| 1  | 0.221622  | -4.691776 | 1.341696  | 1  | -0.909363 | 5.216567  | 2.982939  |
| 1  | -1.546526 | -4.554754 | 1.476769  | 6  | -1.855783 | 1.655688  | 1.695817  |
| 1  | -0.605067 | -5.193586 | 2.820443  | 6  | -1.829219 | 1.931344  | 3.064897  |
| 6  | 0.814138  | -3.027714 | 3.514976  | 1  | -1.461736 | 3.407895  | 4.591118  |
| 1  | 1.700932  | -3.328230 | 2.948857  | 1  | -2.111360 | 0.664019  | 1.343277  |
| 1  | 0.698545  | -3.723773 | 4.352560  | 1  | -2.079006 | 1.148953  | 3.774670  |
| 1  | 0.997764  | -2.029172 | 3.925356  | 1  | -1.522851 | 4.433883  | -1.973457 |
| 6  | -1.677560 | -2.712186 | 3.483407  | 1  | -2.294444 | 2.225174  | -1.202386 |
| 1  | -1.577641 | -1.724498 | 3.947114  |    |           |           |           |
| 1  | -1.799701 | -3.448107 | 4.285377  |    |           |           |           |
| 1  | -2.590006 | -2.710985 | 2.878114  |    |           |           |           |
| 6  | 2.684112  | 0.937482  | -1.575680 |    |           |           |           |
| 6  | 2.047192  | 2.127542  | -1.994613 |    |           |           |           |
| 6  | 2.727770  | 3.026028  | -2.831167 | 28 | -0.363543 | -0.097661 | -0.676504 |
| 6  | 4.020884  | 2.751798  | -3.265053 | 6  | -1.844578 | -1.183453 | 0.891601  |
| 6  | 4.655073  | 1.582014  | -2.850464 | 6  | -1.939199 | -1.598215 | -0.400984 |
| 6  | 3.991381  | 0.689646  | -2.008798 | 6  | -1.607643 | -2.892806 | -1.096610 |
| 1  | 2.230274  | 3.937930  | -3.137699 | 1  | -2.441385 | -3.608724 | -0.993106 |
| 1  | 4.530467  | 3.450956  | -3.919375 | 1  | -0.693996 | -3.375833 | -0.762983 |

**(R)-IM6B**

SCF Energy = -2456.135283

Gibbs Free Energy = -2455.469372

|    |           |           |           |    |           |           |           |
|----|-----------|-----------|-----------|----|-----------|-----------|-----------|
| 8  | -1.452080 | -2.495333 | -2.455691 | 6  | 1.937217  | -4.804139 | -0.179096 |
| 6  | -2.541134 | -1.601833 | -2.710764 | 1  | 1.420480  | -3.182936 | -1.494101 |
| 1  | -2.310627 | -1.011780 | -3.597452 | 6  | 2.625239  | -4.182913 | 2.055062  |
| 1  | -3.464926 | -2.175169 | -2.866824 | 1  | 2.647664  | -2.075746 | 2.488292  |
| 6  | -2.659263 | -0.696629 | -1.450811 | 6  | 2.368327  | -5.166808 | 1.100438  |
| 8  | -1.862482 | 0.445349  | -1.545381 | 1  | 1.745744  | -5.566079 | -0.927701 |
| 6  | -4.091054 | -0.362441 | -1.066354 | 1  | 2.967318  | -4.461568 | 3.046449  |
| 6  | -4.977734 | -1.367750 | -0.657758 | 1  | 2.508281  | -6.213929 | 1.348307  |
| 6  | -4.534565 | 0.961316  | -1.101988 | 6  | 1.627093  | 1.756331  | -1.824326 |
| 6  | -6.281160 | -1.051902 | -0.280738 | 8  | 1.849619  | 3.026961  | -2.183793 |
| 1  | -4.650326 | -2.403829 | -0.627182 | 6  | -0.315187 | 2.771435  | -1.249069 |
| 6  | -5.842796 | 1.278516  | -0.729152 | 6  | 0.743706  | 3.826033  | -1.662546 |
| 1  | -3.847689 | 1.734297  | -1.425464 | 7  | 0.482052  | 1.511638  | -1.274998 |
| 6  | -6.717430 | 0.275198  | -0.314388 | 6  | 1.154608  | 4.581466  | -0.376177 |
| 1  | -6.957198 | -1.839455 | 0.037591  | 1  | 2.158670  | 4.266138  | -0.069410 |
| 1  | -6.176930 | 2.311015  | -0.764441 | 1  | 1.191988  | 5.663141  | -0.533911 |
| 1  | -7.733151 | 0.521712  | -0.021998 | 6  | 0.106696  | 4.176949  | 0.636685  |
| 1  | -2.230380 | -0.180480 | 1.078346  | 6  | -0.085496 | 4.671994  | 1.925569  |
| 6  | -1.618774 | -1.962600 | 2.169101  | 6  | -0.735790 | 3.179089  | 0.137968  |
| 6  | -1.151205 | -3.409073 | 1.962494  | 6  | -1.121719 | 4.149096  | 2.704581  |
| 1  | -0.185347 | -3.462356 | 1.462884  | 1  | 0.556120  | 5.453913  | 2.320897  |
| 1  | -1.879518 | -3.985166 | 1.384874  | 6  | -1.790769 | 2.674863  | 0.896739  |
| 1  | -1.046378 | -3.899007 | 2.934701  | 6  | -1.972139 | 3.161013  | 2.193731  |
| 6  | -0.652602 | -1.207519 | 3.098401  | 1  | -1.281918 | 4.528622  | 3.709003  |
| 1  | 0.366693  | -1.219222 | 2.711209  | 1  | -2.460555 | 1.936926  | 0.471448  |
| 1  | -0.640910 | -1.677523 | 4.086224  | 1  | -2.791207 | 2.788259  | 2.800888  |
| 1  | -0.955930 | -0.163402 | 3.224541  | 1  | 0.428760  | 4.485502  | -2.469718 |
| 6  | -3.024463 | -1.981125 | 2.832308  | 1  | -1.147983 | 2.641927  | -1.940973 |
| 1  | -3.376534 | -0.969259 | 3.054930  |    |           |           |           |
| 1  | -2.972287 | -2.538456 | 3.772525  |    |           |           |           |
| 1  | -3.764175 | -2.461519 | 2.185654  |    |           |           |           |
| 6  | 2.804080  | -0.416546 | -1.388061 |    |           |           |           |
| 6  | 2.696921  | 0.794367  | -2.106965 |    |           |           |           |
| 6  | 3.631499  | 1.111603  | -3.099856 | 28 | 0.057485  | -0.112635 | -0.148274 |
| 6  | 4.660997  | 0.223374  | -3.404060 | 6  | -4.012634 | 1.062133  | -0.629451 |
| 6  | 4.770138  | -0.974039 | -2.701108 | 6  | -3.222549 | 0.648000  | 0.362919  |
| 6  | 3.853483  | -1.285983 | -1.693217 | 6  | -2.541542 | 1.448757  | 1.456340  |
| 1  | 3.539036  | 2.051039  | -3.631763 | 1  | -3.258535 | 1.758712  | 2.230905  |
| 1  | 5.374226  | 0.469745  | -4.183128 | 1  | -2.012737 | 2.335815  | 1.102392  |
| 1  | 5.572564  | -1.668681 | -2.927304 | 8  | -1.570747 | 0.559427  | 2.028175  |
| 1  | 3.963088  | -2.213044 | -1.144109 | 6  | -2.171028 | -0.735852 | 1.950490  |
| 15 | 1.657246  | -0.736927 | 0.018100  | 1  | -1.407821 | -1.485989 | 2.150210  |
| 6  | 2.364252  | 0.317241  | 1.328054  | 1  | -2.979111 | -0.830324 | 2.688652  |
| 6  | 3.733887  | 0.249637  | 1.632502  | 6  | -2.747026 | -0.805908 | 0.522170  |
| 6  | 1.546459  | 1.233509  | 2.001386  | 8  | -1.687482 | -1.063272 | -0.415641 |
| 6  | 4.269871  | 1.075407  | 2.616784  | 1  | -4.380480 | 0.287641  | -1.302526 |
| 1  | 4.377389  | -0.442528 | 1.098676  | 6  | 2.376533  | 1.258553  | 1.683076  |
| 6  | 2.089935  | 2.061623  | 2.984321  | 6  | 2.378062  | 0.064183  | 2.439150  |
| 1  | 0.494156  | 1.309752  | 1.756315  | 6  | 2.970164  | 0.044545  | 3.709109  |
| 6  | 3.447212  | 1.980553  | 3.294304  | 6  | 3.537224  | 1.200193  | 4.240955  |
| 1  | 5.327619  | 1.017738  | 2.852464  | 6  | 3.532407  | 2.381144  | 3.500639  |
| 1  | 1.448265  | 2.769528  | 3.495974  | 6  | 2.960560  | 2.405911  | 2.227414  |
| 1  | 3.868497  | 2.624773  | 4.059592  | 1  | 2.975434  | -0.879308 | 4.274939  |
| 6  | 1.998083  | -2.466959 | 0.466269  | 1  | 3.981777  | 1.175723  | 5.229989  |
| 6  | 1.750434  | -3.461022 | -0.496971 | 1  | 3.974637  | 3.283984  | 3.908923  |
| 6  | 2.444312  | -2.834729 | 1.741750  | 1  | 2.959047  | 3.329329  | 1.659071  |

**(R)-TS5B**

SCF Energy = -2532.584329

Gibbs Free Energy = -2531.901907

|    |           |           |           |    |           |           |           |
|----|-----------|-----------|-----------|----|-----------|-----------|-----------|
| 15 | 1.700592  | 1.274146  | -0.015102 | 1  | -6.508940 | -4.675734 | 0.176840  |
| 6  | 3.090559  | 0.926294  | -1.126904 | 6  | -4.430631 | 2.482541  | -0.985992 |
| 6  | 4.256167  | 1.708411  | -1.101491 | 6  | -4.855626 | 3.297122  | 0.250572  |
| 6  | 2.993699  | -0.164611 | -2.002009 | 1  | -4.020219 | 3.494996  | 0.926825  |
| 6  | 5.314146  | 1.397768  | -1.951076 | 1  | -5.255815 | 4.267179  | -0.061033 |
| 1  | 4.337134  | 2.551570  | -0.422740 | 1  | -5.635534 | 2.776479  | 0.814215  |
| 6  | 4.061252  | -0.473333 | -2.844869 | 6  | -3.249780 | 3.190076  | -1.689966 |
| 1  | 2.094916  | -0.769583 | -2.025757 | 1  | -2.933199 | 2.636594  | -2.580461 |
| 6  | 5.217696  | 0.306094  | -2.820339 | 1  | -3.538755 | 4.196508  | -2.011060 |
| 1  | 6.214941  | 2.002673  | -1.934611 | 1  | -2.391392 | 3.302818  | -1.017224 |
| 1  | 3.982120  | -1.323698 | -3.513527 | 6  | -5.621180 | 2.405409  | -1.960168 |
| 1  | 6.047741  | 0.065988  | -3.477215 | 1  | -5.938514 | 3.406931  | -2.265648 |
| 6  | 1.115434  | 2.965397  | -0.318247 | 1  | -5.355889 | 1.844374  | -2.862377 |
| 6  | 0.333290  | 3.607899  | 0.657229  | 1  | -6.476295 | 1.906717  | -1.492871 |
| 6  | 1.295624  | 3.561909  | -1.573359 |    |           |           |           |
| 6  | -0.248526 | 4.842689  | 0.378453  |    |           |           |           |
| 1  | 0.185961  | 3.144462  | 1.627663  |    |           |           |           |
| 6  | 0.704990  | 4.796794  | -1.845581 |    |           |           |           |
| 1  | 1.891854  | 3.064609  | -2.330788 |    |           |           |           |
| 6  | -0.065241 | 5.436725  | -0.873770 | 28 | 0.234870  | 0.276455  | -1.072243 |
| 1  | -0.845054 | 5.340436  | 1.136288  | 6  | -2.396658 | 0.075019  | 0.199504  |
| 1  | 0.848939  | 5.257660  | -2.817312 | 6  | -1.853691 | -0.061102 | -1.038857 |
| 1  | -0.522247 | 6.396971  | -1.089598 | 6  | -2.323811 | -0.901761 | -2.187733 |
| 6  | 1.805613  | -1.189764 | 1.927305  | 1  | -3.426639 | -0.949684 | -2.224518 |
| 8  | 2.278426  | -2.318427 | 2.465462  | 1  | -1.937295 | -1.921033 | -2.166699 |
| 6  | 0.696041  | -2.788621 | 0.755100  | 8  | -1.822543 | -0.292896 | -3.377744 |
| 6  | 1.711676  | -3.450023 | 1.730438  | 6  | -2.156399 | 1.077435  | -3.305459 |
| 7  | 0.901317  | -1.333590 | 1.011728  | 1  | -1.668269 | 1.587280  | -4.139776 |
| 6  | 2.798897  | -4.137006 | 0.875802  | 1  | -3.243643 | 1.215764  | -3.379040 |
| 1  | 3.782578  | -3.723209 | 1.120013  | 6  | -1.632703 | 1.714978  | -2.002541 |
| 1  | 2.842426  | -5.210038 | 1.089635  | 8  | -0.330972 | 1.902368  | -1.920460 |
| 6  | 2.380066  | -3.874338 | -0.554173 | 6  | -2.496337 | 2.761851  | -1.368428 |
| 6  | 3.026164  | -4.264394 | -1.726395 | 6  | -3.864721 | 2.558316  | -1.128179 |
| 6  | 1.165197  | -3.187022 | -0.622547 | 6  | -1.923228 | 3.996367  | -1.036617 |
| 6  | 2.435548  | -3.964194 | -2.956916 | 6  | -4.634807 | 3.561624  | -0.550296 |
| 1  | 3.969318  | -4.801116 | -1.687800 | 1  | -4.321596 | 1.602361  | -1.362387 |
| 6  | 0.554345  | -2.907762 | -1.845190 | 6  | -2.698949 | 5.005405  | -0.464738 |
| 6  | 1.204760  | -3.299857 | -3.017698 | 1  | -0.873585 | 4.158475  | -1.248144 |
| 1  | 2.927923  | -4.267731 | -3.875656 | 6  | -4.053432 | 4.789403  | -0.215589 |
| 1  | -0.403412 | -2.399993 | -1.877677 | 1  | -5.688996 | 3.388431  | -0.358653 |
| 1  | 0.749409  | -3.093025 | -3.980816 | 1  | -2.244203 | 5.959980  | -0.219291 |
| 1  | 1.261537  | -4.104791 | 2.475536  | 1  | -4.657501 | 5.571915  | 0.232596  |
| 1  | -0.352108 | -3.029417 | 0.941298  | 1  | -2.005837 | 0.889961  | 0.810615  |
| 8  | -0.819812 | 0.687701  | -1.642173 | 6  | 2.364134  | -2.216881 | -0.789310 |
| 1  | -1.181371 | 1.573572  | -1.496882 | 6  | 3.367063  | -1.324046 | -1.234552 |
| 1  | -1.582813 | -0.137620 | -1.272608 | 6  | 4.576282  | -1.826520 | -1.733922 |
| 6  | -3.816313 | -1.873078 | 0.381642  | 6  | 4.794928  | -3.199909 | -1.811628 |
| 6  | -3.541634 | -3.071564 | -0.283635 | 6  | 3.811123  | -4.082146 | -1.372154 |
| 6  | -5.074230 | -1.696329 | 0.973332  | 6  | 2.608439  | -3.591238 | -0.858808 |
| 6  | -4.508277 | -4.076143 | -0.357111 | 1  | 5.338709  | -1.131153 | -2.063056 |
| 1  | -2.573998 | -3.204666 | -0.751935 | 1  | 5.731300  | -3.575218 | -2.210138 |
| 6  | -6.037319 | -2.700443 | 0.902936  | 1  | 3.975186  | -5.153713 | -1.421515 |
| 1  | -5.304685 | -0.762519 | 1.477084  | 1  | 1.855673  | -4.288164 | -0.510729 |
| 6  | -5.756929 | -3.895281 | 0.236299  | 15 | 0.822876  | -1.560042 | -0.035514 |
| 1  | -4.284608 | -4.999679 | -0.882645 | 6  | 1.318395  | -1.220973 | 1.687401  |
| 1  | -7.008819 | -2.548159 | 1.362929  | 6  | 2.081921  | -2.148412 | 2.413430  |

**(R)-TS1A**

SCF Energy = -2529.912102

Gibbs Free Energy = -2529.282109

|   |           |           |           |    |           |           |           |
|---|-----------|-----------|-----------|----|-----------|-----------|-----------|
| 6 | 0.948553  | -0.008810 | 2.281538  | 28 | -0.281535 | 0.293867  | 0.440614  |
| 6 | 2.462521  | -1.861011 | 3.721683  | 6  | -2.191681 | 2.969571  | 0.780495  |
| 1 | 2.382976  | -3.085445 | 1.956156  | 6  | -1.370732 | 3.003080  | -1.427625 |
| 6 | 1.339888  | 0.279420  | 3.588613  | 6  | -1.827748 | 1.531416  | -1.308867 |
| 1 | 0.380008  | 0.719474  | 1.717331  | 6  | -1.854944 | 1.549710  | 0.441572  |
| 6 | 2.093860  | -0.646697 | 4.308882  | 1  | -1.612239 | 3.318847  | 1.645670  |
| 1 | 3.052864  | -2.579404 | 4.281387  | 1  | -3.258039 | 3.085470  | 1.023678  |
| 1 | 1.068111  | 1.232217  | 4.029246  | 6  | -1.978725 | 0.401871  | 1.115267  |
| 1 | 2.401478  | -0.423270 | 5.325547  | 6  | -2.892347 | -0.227521 | 2.022434  |
| 6 | -0.316862 | -2.979789 | 0.043025  | 6  | -2.442262 | -1.154473 | 2.985907  |
| 6 | -0.622776 | -3.691200 | -1.130053 | 6  | -4.278901 | 0.009994  | 1.896133  |
| 6 | -0.936763 | -3.336295 | 1.247075  | 6  | -3.348734 | -1.802308 | 3.817822  |
| 6 | -1.525855 | -4.751668 | -1.090808 | 1  | -1.375107 | -1.336610 | 3.067279  |
| 1 | -0.143482 | -3.426798 | -2.068299 | 6  | -5.181156 | -0.664412 | 2.712042  |
| 6 | -1.843528 | -4.396726 | 1.279619  | 1  | -4.625346 | 0.701699  | 1.134695  |
| 1 | -0.712798 | -2.790216 | 2.156111  | 6  | -4.720043 | -1.563713 | 3.678598  |
| 6 | -2.136731 | -5.106249 | 0.115753  | 1  | -2.993504 | -2.501030 | 4.569778  |
| 1 | -1.749497 | -5.301880 | -1.999130 | 1  | -6.246633 | -0.487090 | 2.600293  |
| 1 | -2.322266 | -4.662584 | 2.216154  | 1  | -5.427811 | -2.080686 | 4.319807  |
| 1 | -2.837987 | -5.934060 | 0.145090  | 8  | -1.896044 | 3.787484  | -0.357843 |
| 6 | 3.210442  | 0.137506  | -1.168766 | 1  | -0.274855 | 3.002125  | -1.418771 |
| 8 | 4.346298  | 0.845936  | -1.197793 | 1  | -1.724552 | 3.446092  | -2.364707 |
| 6 | 2.454042  | 2.263957  | -1.005600 | 8  | -1.024102 | 0.636609  | -1.826471 |
| 6 | 4.007643  | 2.264335  | -1.098356 | 6  | -3.318263 | 1.304799  | -1.593477 |
| 7 | 2.112935  | 0.818552  | -1.094859 | 6  | -4.281564 | 2.321832  | -1.544846 |
| 6 | 4.560354  | 2.860411  | 0.211227  | 6  | -3.735347 | -0.006018 | -1.859344 |
| 1 | 5.255609  | 2.157229  | 0.680635  | 6  | -5.631862 | 2.029098  | -1.752568 |
| 1 | 5.121391  | 3.779750  | 0.012127  | 1  | -3.975714 | 3.341567  | -1.334464 |
| 6 | 3.332239  | 3.136286  | 1.049498  | 6  | -5.081401 | -0.298859 | -2.060982 |
| 6 | 3.274180  | 3.660099  | 2.340840  | 1  | -2.979163 | -0.781554 | -1.903890 |
| 6 | 2.153796  | 2.853689  | 0.353625  | 6  | -6.038464 | 0.718739  | -2.005676 |
| 6 | 2.026327  | 3.910454  | 2.916187  | 1  | -6.366309 | 2.829304  | -1.716828 |
| 1 | 4.184606  | 3.883657  | 2.888919  | 1  | -5.387614 | -1.321752 | -2.263484 |
| 6 | 0.905978  | 3.114179  | 0.917798  | 1  | -7.089257 | 0.491977  | -2.162168 |
| 6 | 0.848785  | 3.647775  | 2.206376  | 6  | 2.752894  | 0.290554  | 1.584939  |
| 1 | 1.970830  | 4.327944  | 3.916830  | 6  | 2.480472  | -1.020975 | 2.050927  |
| 1 | 0.001979  | 2.910771  | 0.357625  | 6  | 3.244331  | -1.560396 | 3.096196  |
| 1 | -0.114896 | 3.867938  | 2.655684  | 6  | 4.250546  | -0.812727 | 3.702663  |
| 1 | 4.406074  | 2.738002  | -1.995586 | 6  | 4.507282  | 0.483968  | 3.262228  |
| 1 | 1.944398  | 2.779997  | -1.820361 | 6  | 3.767136  | 1.023039  | 2.207993  |
| 6 | -3.486342 | -0.660430 | 0.816310  | 1  | 3.032815  | -2.568823 | 3.430864  |
| 6 | -4.133600 | -0.083967 | 1.929313  | 1  | 4.826564  | -1.241965 | 4.516114  |
| 6 | -3.928256 | -1.915572 | 0.350989  | 1  | 5.287183  | 1.076919  | 3.730323  |
| 6 | -5.209179 | -0.722165 | 2.534940  | 1  | 3.983391  | 2.026313  | 1.858365  |
| 1 | -3.791995 | 0.879267  | 2.297499  | 15 | 1.803943  | 0.980325  | 0.163754  |
| 6 | -4.998072 | -2.555520 | 0.966325  | 6  | 2.665957  | 0.238804  | -1.272835 |
| 1 | -3.406441 | -2.409803 | -0.457648 | 6  | 1.961253  | 0.182716  | -2.485286 |
| 6 | -5.645820 | -1.959439 | 2.051888  | 6  | 3.970385  | -0.270755 | -1.197326 |
| 1 | -5.706247 | -0.262526 | 3.382965  | 6  | 2.572092  | -0.369487 | -3.610832 |
| 1 | -5.322594 | -3.526299 | 0.605922  | 1  | 0.933818  | 0.540888  | -2.518183 |
| 1 | -6.481981 | -2.462290 | 2.527358  | 6  | 4.569204  | -0.826636 | -2.327710 |
|   |           |           |           | 1  | 4.515272  | -0.237934 | -0.259362 |
|   |           |           |           | 6  | 3.870796  | -0.874594 | -3.535894 |
|   |           |           |           | 1  | 2.021814  | -0.420664 | -4.545392 |
|   |           |           |           | 1  | 5.578157  | -1.223766 | -2.263899 |
|   |           |           |           | 1  | 4.336541  | -1.312845 | -4.413870 |

**(R)-TS1C**

SCF Energy = -2529.420822

Gibbs Free Energy = -2528.807630

|    |           |           |           |    |           |           |           |
|----|-----------|-----------|-----------|----|-----------|-----------|-----------|
| 6  | 2.263201  | 2.748597  | 0.121070  | 1  | 6.794103  | 1.326438  | -0.518825 |
| 6  | 3.374118  | 3.230948  | -0.584917 | 1  | 5.736358  | -2.832466 | -0.795427 |
| 6  | 1.431835  | 3.651522  | 0.799402  | 1  | 7.409826  | -1.069052 | -0.278183 |
| 6  | 3.651556  | 4.597787  | -0.601323 | 1  | 1.991043  | 0.047187  | 1.103683  |
| 1  | 4.010041  | 2.539050  | -1.127303 | 6  | 2.401132  | 1.964461  | 2.036355  |
| 6  | 1.712694  | 5.016122  | 0.783000  | 6  | 2.358888  | 3.472011  | 1.756537  |
| 1  | 0.558286  | 3.277820  | 1.321988  | 1  | 1.358289  | 3.799138  | 1.462211  |
| 6  | 2.822957  | 5.490473  | 0.081911  | 1  | 3.063156  | 3.755203  | 0.969830  |
| 1  | 4.510692  | 4.966592  | -1.153784 | 1  | 2.639136  | 4.023781  | 2.658757  |
| 1  | 1.054976  | 5.707824  | 1.299801  | 6  | 1.485041  | 1.628920  | 3.234205  |
| 1  | 3.036344  | 6.554943  | 0.058674  | 1  | 0.450982  | 1.922686  | 3.038287  |
| 6  | 1.408970  | -1.856573 | 1.488190  | 1  | 1.830436  | 2.159630  | 4.126960  |
| 8  | 1.486906  | -3.182204 | 1.751683  | 1  | 1.489011  | 0.556867  | 3.452899  |
| 6  | -0.379284 | -2.677264 | 0.407726  | 6  | 3.846094  | 1.531173  | 2.376153  |
| 6  | 0.270124  | -3.810953 | 1.245997  | 1  | 3.896436  | 0.461291  | 2.603364  |
| 7  | 0.380788  | -1.472502 | 0.807119  | 1  | 4.201747  | 2.081123  | 3.253255  |
| 6  | 0.616684  | -4.960868 | 0.289978  | 1  | 4.527475  | 1.728199  | 1.545023  |
| 1  | 1.618435  | -5.348750 | 0.499857  | 6  | -3.170195 | 0.373177  | -0.863452 |
| 1  | -0.086695 | -5.790798 | 0.431868  | 6  | -3.299764 | -0.905048 | -1.451992 |
| 6  | 0.478074  | -4.347247 | -1.085569 | 6  | -4.518268 | -1.287464 | -2.031750 |
| 6  | 0.833258  | -4.897272 | -2.315699 | 6  | -5.600886 | -0.412650 | -2.046484 |
| 6  | -0.111030 | -3.079897 | -1.026837 | 6  | -5.478608 | 0.847823  | -1.465535 |
| 6  | 0.590246  | -4.160786 | -3.477763 | 6  | -4.273875 | 1.231880  | -0.874853 |
| 1  | 1.293854  | -5.879849 | -2.372063 | 1  | -4.604686 | -2.272934 | -2.472725 |
| 6  | -0.355770 | -2.334613 | -2.178603 | 1  | -6.534399 | -0.717112 | -2.507285 |
| 6  | 0.001181  | -2.894165 | -3.407823 | 1  | -6.318428 | 1.535068  | -1.467186 |
| 1  | 0.865296  | -4.575728 | -4.443271 | 1  | -4.192357 | 2.214889  | -0.426549 |
| 1  | -0.777593 | -1.332327 | -2.117549 | 15 | -1.622125 | 0.861921  | 0.003246  |
| 1  | -0.174202 | -2.330321 | -4.319055 | 6  | -1.888215 | 0.275030  | 1.708290  |
| 1  | -0.310394 | -4.120677 | 2.118500  | 6  | -2.957325 | 0.747053  | 2.486398  |
| 1  | -1.436119 | -2.507766 | 0.624078  | 6  | -1.038342 | -0.712492 | 2.222282  |
|    |           |           |           | 6  | -3.154123 | 0.248519  | 3.771511  |
|    |           |           |           | 1  | -3.631263 | 1.500279  | 2.091089  |
|    |           |           |           | 6  | -1.246417 | -1.217306 | 3.505848  |
|    |           |           |           | 1  | -0.221355 | -1.092795 | 1.622925  |
|    |           |           |           | 6  | -2.299094 | -0.733487 | 4.282050  |
| 28 | 0.098998  | -0.054166 | -0.985163 | 1  | -3.977286 | 0.619839  | 4.373459  |
| 6  | 1.952262  | 1.113152  | 0.866715  | 1  | -0.584679 | -1.987412 | 3.887550  |
| 6  | 1.547958  | 1.420680  | -0.379479 | 1  | -2.460306 | -1.121973 | 5.282665  |
| 6  | 1.467406  | 2.699593  | -1.153393 | 6  | -1.692169 | 2.679807  | 0.030034  |
| 1  | 2.397439  | 3.284505  | -1.093384 | 6  | -1.850495 | 3.358044  | -1.191143 |
| 1  | 0.638842  | 3.338970  | -0.858038 | 6  | -1.474142 | 3.411005  | 1.203764  |
| 8  | 1.233753  | 2.312979  | -2.512103 | 6  | -1.800297 | 4.748569  | -1.229804 |
| 6  | 2.273279  | 1.424927  | -2.875906 | 1  | -1.995129 | 2.798757  | -2.109916 |
| 1  | 2.009139  | 0.979853  | -3.838034 | 6  | -1.415130 | 4.805559  | 1.157372  |
| 1  | 3.219890  | 1.969831  | -2.976540 | 1  | -1.354732 | 2.898233  | 2.150647  |
| 6  | 2.440819  | 0.257791  | -1.870713 | 6  | -1.577196 | 5.474554  | -0.055839 |
| 8  | 1.594000  | -0.736131 | -1.963307 | 1  | -1.923094 | 5.264871  | -2.176165 |
| 6  | 3.826451  | -0.081407 | -1.427431 | 1  | -1.244872 | 5.365764  | 2.071115  |
| 6  | 4.785021  | 0.907495  | -1.151380 | 1  | -1.531234 | 6.558254  | -0.088799 |
| 6  | 4.185050  | -1.430230 | -1.296154 | 6  | -2.205668 | -1.886807 | -1.459272 |
| 6  | 6.064240  | 0.553083  | -0.736091 | 8  | -2.571721 | -3.163012 | -1.639730 |
| 1  | 4.525561  | 1.957416  | -1.234444 | 6  | -0.225904 | -2.977835 | -1.338254 |
| 6  | 5.469407  | -1.784254 | -0.885396 | 6  | -1.380342 | -4.001299 | -1.545021 |
| 1  | 3.453004  | -2.190469 | -1.538490 | 7  | -0.938613 | -1.669939 | -1.317124 |
| 6  | 6.409951  | -0.795005 | -0.599146 | 6  | -1.451869 | -4.893426 | -0.288573 |

**(R)-TS3B**

SCF Energy = -2456.112094

Gibbs Free Energy = -2455.448813

|   |           |           |           |   |           |           |           |
|---|-----------|-----------|-----------|---|-----------|-----------|-----------|
| 1 | -2.455204 | -4.849199 | 0.146567  | 6 | 0.183268  | 3.544249  | 0.949662  |
| 1 | -1.259896 | -5.941054 | -0.543871 | 6 | 1.117603  | 3.780567  | -1.279253 |
| 6 | -0.378686 | -4.346909 | 0.625782  | 6 | -0.430823 | 4.788014  | 0.823024  |
| 6 | -0.049483 | -4.767943 | 1.914064  | 1 | 0.062800  | 2.968531  | 1.862214  |
| 6 | 0.356460  | -3.329336 | 0.011714  | 6 | 0.494047  | 5.023985  | -1.400341 |
| 6 | 1.027497  | -4.167138 | 2.571004  | 1 | 1.718093  | 3.391031  | -2.093932 |
| 1 | -0.614612 | -5.557993 | 2.399473  | 6 | -0.279705 | 5.526984  | -0.354345 |
| 6 | 1.449918  | -2.746563 | 0.651116  | 1 | -1.027220 | 5.180465  | 1.640577  |
| 6 | 1.780297  | -3.169569 | 1.940200  | 1 | 0.616811  | 5.598694  | -2.312557 |
| 1 | 1.295061  | -4.492333 | 3.571649  | 1 | -0.762488 | 6.493850  | -0.452731 |
| 1 | 2.032504  | -1.985746 | 0.148215  | 6 | 1.802376  | -1.206657 | 1.876364  |
| 1 | 2.631377  | -2.729146 | 2.450600  | 8 | 2.290949  | -2.350072 | 2.372223  |
| 1 | -1.323780 | -4.563564 | -2.476818 | 6 | 0.754310  | -2.765371 | 0.630221  |
| 1 | 0.514408  | -2.946942 | -2.138696 | 6 | 1.603459  | -3.469866 | 1.722687  |

**(R)\_IM7B**

SCF Energy = -2532.592197

Gibbs Free Energy = -2531.908185

|    |           |           |           |   |           |           |           |
|----|-----------|-----------|-----------|---|-----------|-----------|-----------|
| 28 | 0.034254  | -0.087172 | -0.177900 | 6 | 1.475038  | -3.075779 | -0.662917 |
| 6  | -4.039224 | 0.928844  | -0.637828 | 6 | 3.142970  | -3.773937 | -2.761940 |
| 6  | -3.264473 | 0.499901  | 0.360458  | 1 | 4.248372  | -4.942624 | -1.321326 |
| 6  | -2.612565 | 1.275506  | 1.487940  | 6 | 1.202590  | -2.576736 | -1.935578 |
| 1  | -3.348063 | 1.556762  | 2.255980  | 6 | 2.050072  | -2.930108 | -2.986555 |
| 1  | -2.087209 | 2.174451  | 1.163062  | 1 | 3.794979  | -4.039736 | -3.587942 |
| 8  | -1.642948 | 0.381273  | 2.051875  | 1 | 0.358146  | -1.917620 | -2.109298 |
| 6  | -2.200926 | -0.921737 | 1.912621  | 1 | 1.859779  | -2.546507 | -3.983544 |
| 1  | -1.415457 | -1.658336 | 2.074594  | 1 | 1.028331  | -3.973533 | 2.500995  |
| 1  | -3.009557 | -1.084997 | 2.638004  | 1 | -0.299652 | -3.047193 | 0.621696  |
| 6  | -2.787254 | -0.945053 | 0.492940  | 8 | -0.639371 | 0.788591  | -1.628341 |
| 8  | -1.668948 | -1.153113 | -0.438972 | 1 | -0.910551 | 1.699455  | -1.459728 |
| 1  | -4.391413 | 0.168735  | -1.335512 | 1 | -1.812695 | -0.552733 | -1.213787 |
| 6  | 2.385452  | 1.241083  | 1.671033  | 6 | -3.819224 | -2.030558 | 0.277422  |
| 6  | 2.401110  | 0.029611  | 2.398859  | 6 | -3.507700 | -3.193928 | -0.433161 |
| 6  | 3.042748  | -0.025763 | 3.643986  | 6 | -5.091632 | -1.899890 | 0.850376  |
| 6  | 3.650717  | 1.108331  | 4.176431  | 6 | -4.455465 | -4.209871 | -0.570464 |
| 6  | 3.635688  | 2.305792  | 3.462598  | 1 | -2.530199 | -3.295716 | -0.889473 |
| 6  | 3.008627  | 2.368178  | 2.217188  | 6 | -6.033650 | -2.917020 | 0.717359  |
| 1  | 3.056476  | -0.962182 | 4.188449  | 1 | -5.348411 | -0.992691 | 1.388365  |
| 1  | 4.135482  | 1.054713  | 5.145294  | 6 | -5.718071 | -4.076244 | 0.005065  |
| 1  | 4.111501  | 3.191657  | 3.870287  | 1 | -4.204688 | -5.104946 | -1.131253 |
| 1  | 2.998461  | 3.302720  | 1.667150  | 1 | -7.016489 | -2.801853 | 1.163375  |
| 15 | 1.605910  | 1.338997  | 0.024074  | 1 | -6.454289 | -4.866208 | -0.103572 |
| 6  | 2.911507  | 1.103853  | -1.213951 | 6 | -4.458167 | 2.354833  | -0.965332 |
| 6  | 4.271141  | 1.225647  | -0.896890 | 6 | -4.956063 | 3.113653  | 0.279947  |
| 6  | 2.515480  | 0.757182  | -2.517087 | 1 | -4.158778 | 3.290088  | 1.006270  |
| 6  | 5.231526  | 1.006964  | -1.883757 | 1 | -5.347965 | 4.092556  | -0.013571 |
| 1  | 4.579656  | 1.481653  | 0.110853  | 1 | -5.760118 | 2.565486  | 0.780270  |
| 6  | 3.484553  | 0.550893  | -3.496521 | 6 | -3.253811 | 3.103200  | -1.581874 |
| 1  | 1.457731  | 0.655005  | -2.741030 | 1 | -2.874805 | 2.577860  | -2.463721 |
| 6  | 4.839715  | 0.672137  | -3.181273 | 1 | -3.550980 | 4.111229  | -1.889612 |
| 1  | 6.284854  | 1.097693  | -1.638807 | 1 | -2.436561 | 3.209688  | -0.860883 |
| 1  | 3.181573  | 0.286694  | -4.504681 | 6 | -5.598137 | 2.297796  | -1.999477 |
| 1  | 5.591316  | 0.502342  | -3.945716 | 1 | -5.914750 | 3.306007  | -2.282159 |
| 6  | 0.963361  | 3.036474  | -0.103458 | 1 | -5.279164 | 1.776687  | -2.908258 |

1 -6.468438 1.770589 -1.595364

**(R)-TS5**

SCF Energy = -2529.915624

Gibbs Free Energy = -2529.282551

28 0.041715 -0.097717 -0.967309  
6 3.919428 1.416486 2.550288  
6 3.523235 1.513791 1.219897  
6 2.445844 0.753542 0.731020  
6 1.826023 -0.148779 1.608751  
6 2.215199 -0.245838 2.942881  
6 3.260455 0.543785 3.421650  
1 4.749229 2.017476 2.909547  
1 4.051033 2.187056 0.552214  
1 1.017720 -0.771092 1.245159  
1 1.697219 -0.934328 3.603298  
1 3.570773 0.471868 4.459150  
6 1.954272 0.907325 -0.650600  
6 2.099595 2.048684 -1.357404  
6 1.711906 2.196425 -2.793384  
1 2.532963 2.698006 -3.334968  
1 0.831802 2.842790 -2.885472  
8 1.384907 0.973691 -3.421411  
6 2.416590 0.016223 -3.239010  
1 2.289386 -0.738859 -4.020678  
1 3.403968 0.478237 -3.351035  
6 2.279789 -0.720390 -1.906494  
8 1.160168 -1.402052 -1.791573  
6 3.509052 -1.298743 -1.297583  
6 4.704913 -0.569483 -1.213262  
6 3.471073 -2.610316 -0.805631  
6 5.837440 -1.139891 -0.643315  
1 4.737190 0.458479 -1.558731  
6 4.607763 -3.181772 -0.237927  
1 2.554169 -3.178171 -0.900922  
6 5.791136 -2.447478 -0.151534  
1 6.754850 -0.564477 -0.573394  
1 4.571591 -4.201850 0.131190  
1 6.675599 -2.890585 0.294976  
1 2.532444 2.940991 -0.901175  
6 -2.760675 1.613560 -0.600179  
6 -3.389395 0.559436 -1.302990  
6 -4.673470 0.751138 -1.836178  
6 -5.333068 1.966954 -1.682843  
6 -4.725926 2.998349 -0.969401  
6 -3.453783 2.815551 -0.426511  
1 -5.148271 -0.063471 -2.368487  
1 -6.321109 2.101570 -2.109578  
1 -5.239371 3.943980 -0.828997  
1 -2.995579 3.620996 0.135116  
15 -1.122581 1.364873 0.190579  
6 -1.574553 0.826328 1.877127  
6 -1.564329 -0.540691 2.182911  
6 -2.001678 1.750274 2.842372  
6 -1.958263 -0.979714 3.445938

1 -1.247203 -1.264765 1.444825  
6 -2.389436 1.306925 4.105137  
1 -2.020316 2.810854 2.615548  
6 -2.366145 -0.056595 4.409435  
1 -1.938819 -2.041667 3.667478  
1 -2.710458 2.026250 4.851734  
1 -2.667714 -0.395882 5.395359  
6 -0.366662 3.011479 0.353972  
6 -0.474859 3.952928 -0.682048  
6 0.501666 3.261173 1.427107  
6 0.267620 5.131029 -0.638463  
1 -1.133132 3.765017 -1.523890  
6 1.247234 4.438409 1.461148  
1 0.614826 2.531864 2.220611  
6 1.134312 5.373180 0.430619  
1 0.171994 5.857784 -1.438913  
1 1.921985 4.618071 2.291584  
1 1.715163 6.289482 0.461236  
6 -2.787817 -0.776073 -1.458487  
8 -3.641518 -1.752105 -1.792437  
6 -1.451521 -2.606116 -1.496687  
6 -2.903028 -3.010334 -1.879881  
7 -1.551896 -1.132091 -1.305100  
6 -3.414276 -4.002978 -0.818611  
1 -4.379822 -3.672619 -0.423499  
1 -3.571640 -4.991889 -1.263111  
6 -2.316410 -4.040867 0.220582  
6 -2.308743 -4.709971 1.444300  
6 -1.189066 -3.325792 -0.193591  
6 -1.160363 -4.658384 2.239098  
1 -3.179032 -5.268678 1.775458  
6 -0.031340 -3.292799 0.582641  
6 -0.025549 -3.960703 1.808673  
1 -1.144132 -5.177279 3.192540  
1 0.837281 -2.746848 0.237946  
1 0.865537 -3.940290 2.428317  
1 -3.020122 -3.364227 -2.904288  
1 -0.699641 -2.798026 -2.262326

**(R)-TS5\_p**

SCF Energy = -2338.153451

Gibbs Free Energy = -2337.569338

28 0.070827 -0.300788 -1.141140  
6 3.676543 -3.154245 1.768629  
6 3.500113 -2.469654 0.569808  
6 2.232514 -1.986820 0.194362  
6 1.145058 -2.275941 1.035168  
6 1.317998 -2.957764 2.238030  
6 2.588697 -3.392119 2.614810  
1 4.664748 -3.510244 2.043392  
1 4.352508 -2.303786 -0.081131  
1 0.151783 -1.952938 0.748024  
1 0.459561 -3.142633 2.876335  
1 2.731345 -3.924902 3.549458  
6 2.035895 -1.181634 -1.026809

|    |           |           |           |    |           |           |           |
|----|-----------|-----------|-----------|----|-----------|-----------|-----------|
| 6  | 3.029525  | -0.466089 | -1.595930 | 1  | -5.662097 | -1.766044 | 1.713366  |
| 6  | 2.896285  | 0.263009  | -2.894393 | 6  | -2.359460 | -2.674197 | -0.161473 |
| 1  | 3.802534  | 0.086261  | -3.498575 | 6  | -2.765457 | -3.407271 | 0.955284  |
| 1  | 2.835212  | 1.343583  | -2.723518 | 1  | -4.250226 | -3.650124 | 2.498539  |
| 8  | 1.741779  | -0.093176 | -3.630799 | 1  | -1.458349 | -2.924550 | -0.707767 |
| 6  | 1.647293  | -1.500467 | -3.779160 | 1  | -2.168630 | -4.248487 | 1.293611  |
| 1  | 1.005858  | -1.682811 | -4.648039 | 1  | -4.570283 | 0.393220  | -2.690869 |
| 1  | 2.633829  | -1.946183 | -3.961828 | 1  | -2.576196 | -1.064736 | -2.621241 |
| 6  | 0.962771  | -2.157444 | -2.582818 | 6  | 1.299523  | -3.596727 | -2.287899 |
| 8  | -0.258600 | -1.763029 | -2.359837 | 1  | 0.826704  | -4.212443 | -3.063826 |
| 1  | 4.012065  | -0.393366 | -1.125741 | 1  | 2.375518  | -3.777232 | -2.304852 |
| 6  | -0.342842 | 2.777538  | -0.044264 | 1  | 0.895434  | -3.896524 | -1.320669 |
| 6  | -1.569298 | 2.769199  | -0.748369 |    |           |           |           |
| 6  | -2.224151 | 3.980738  | -1.016783 |    |           |           |           |
| 6  | -1.676935 | 5.191206  | -0.601462 |    |           |           |           |
| 6  | -0.481895 | 5.200436  | 0.114856  |    |           |           |           |
| 6  | 0.171550  | 4.000419  | 0.397623  |    |           |           |           |
| 1  | -3.166152 | 3.962228  | -1.550583 | 28 | 0.089907  | -0.425761 | -0.993764 |
| 1  | -2.189913 | 6.120055  | -0.826224 | 6  | 3.762885  | -2.360827 | 2.526034  |
| 1  | -0.057231 | 6.137474  | 0.460055  | 6  | 3.580087  | -1.978812 | 1.200255  |
| 1  | 1.093669  | 4.019706  | 0.966113  | 6  | 2.300068  | -1.656129 | 0.712166  |
| 15 | 0.484960  | 1.200659  | 0.404572  | 6  | 1.210108  | -1.797257 | 1.586894  |
| 6  | -0.224474 | 0.833654  | 2.048364  | 6  | 1.389035  | -2.175963 | 2.915848  |
| 6  | -1.270327 | -0.092223 | 2.159242  | 6  | 2.670123  | -2.450286 | 3.394289  |
| 6  | 0.214887  | 1.524617  | 3.187747  | 1  | 4.760348  | -2.596314 | 2.884378  |
| 6  | -1.858802 | -0.337874 | 3.399214  | 1  | 4.436971  | -1.926211 | 0.536378  |
| 1  | -1.626870 | -0.625236 | 1.288065  | 1  | 0.209346  | -1.598415 | 1.223364  |
| 6  | -0.372845 | 1.270997  | 4.425113  | 1  | 0.526882  | -2.251076 | 3.571287  |
| 1  | 1.019565  | 2.248204  | 3.112908  | 1  | 2.817749  | -2.746882 | 4.427746  |
| 6  | -1.407959 | 0.338766  | 4.532963  | 6  | 2.092557  | -1.160456 | -0.662601 |
| 1  | -2.664174 | -1.061098 | 3.468581  | 6  | 3.065577  | -0.544284 | -1.367200 |
| 1  | -0.023238 | 1.801648  | 5.304905  | 6  | 2.928976  | -0.131513 | -2.797445 |
| 1  | -1.861558 | 0.143614  | 5.499535  | 1  | 3.854850  | -0.396195 | -3.336348 |
| 6  | 2.241720  | 1.589663  | 0.670276  | 1  | 2.817807  | 0.955937  | -2.873633 |
| 6  | 2.914773  | 2.475332  | -0.186439 | 8  | 1.806977  | -0.696400 | -3.447698 |
| 6  | 2.973503  | 0.841036  | 1.603886  | 6  | 1.776096  | -2.104989 | -3.279730 |
| 6  | 4.298138  | 2.616618  | -0.101905 | 1  | 1.161448  | -2.502387 | -4.093716 |
| 1  | 2.361111  | 3.049979  | -0.921583 | 1  | 2.784488  | -2.534005 | -3.348893 |
| 6  | 4.358393  | 0.980825  | 1.677997  | 6  | 1.097580  | -2.509986 | -1.972643 |
| 1  | 2.469928  | 0.136003  | 2.254843  | 8  | -0.145638 | -2.132942 | -1.861529 |
| 6  | 5.023066  | 1.865018  | 0.826695  | 1  | 4.033349  | -0.321097 | -0.914175 |
| 1  | 4.810007  | 3.310067  | -0.761554 | 6  | -0.493295 | 2.794088  | -0.622652 |
| 1  | 4.916046  | 0.391387  | 2.398260  | 6  | -1.703926 | 2.565080  | -1.316997 |
| 1  | 6.101242  | 1.972777  | 0.888518  | 6  | -2.410477 | 3.650008  | -1.857640 |
| 6  | -2.246201 | 1.528862  | -1.163553 | 6  | -1.929791 | 4.949158  | -1.722189 |
| 8  | -3.553942 | 1.650166  | -1.423914 | 6  | -0.750745 | 5.180232  | -1.016668 |
| 6  | -2.842768 | -0.600382 | -1.671356 | 6  | -0.046542 | 4.109620  | -0.464466 |
| 6  | -4.092882 | 0.324354  | -1.713865 | 1  | -3.339875 | 3.463709  | -2.381283 |
| 7  | -1.748251 | 0.340644  | -1.294231 | 1  | -2.481928 | 5.776176  | -2.155332 |
| 6  | -5.049198 | -0.122535 | -0.588178 | 1  | -0.377999 | 6.191295  | -0.888753 |
| 1  | -5.254147 | 0.716026  | 0.084927  | 1  | 0.862230  | 4.303396  | 0.092705  |
| 1  | -6.011725 | -0.444203 | -0.999834 | 15 | 0.399037  | 1.402883  | 0.178760  |
| 6  | -4.329910 | -1.268935 | 0.086037  | 6  | -0.328681 | 1.379778  | 1.855223  |
| 6  | -4.737330 | -2.006592 | 1.197397  | 6  | -1.330864 | 0.449584  | 2.161591  |
| 6  | -3.138801 | -1.592111 | -0.570519 | 6  | 0.051123  | 2.331781  | 2.813379  |
| 6  | -3.941973 | -3.069380 | 1.634634  | 6  | -1.934478 | 0.459701  | 3.418475  |

(R)-TS5\_q

SCF Energy = -2377.474985

Gibbs Free Energy = -2376.863987



|    |           |           |           |    |           |           |           |
|----|-----------|-----------|-----------|----|-----------|-----------|-----------|
| 1  | -1.641448 | -0.284265 | 1.430011  | 6  | -1.998921 | 3.871232  | 1.243495  |
| 6  | -0.551095 | 2.333444  | 4.069648  | 1  | -0.634711 | 3.410464  | 2.850717  |
| 1  | 0.821257  | 3.060963  | 2.585475  | 1  | -1.112278 | 0.998992  | 2.815499  |
| 6  | -1.542180 | 1.397020  | 4.374522  | 1  | -3.910304 | 1.587144  | -0.391927 |
| 1  | -2.705430 | -0.270091 | 3.641058  | 1  | -3.411242 | 3.987348  | -0.382071 |
| 1  | -0.247198 | 3.066285  | 4.810218  | 1  | -1.793595 | 4.937094  | 1.254696  |
| 1  | -2.007289 | 1.401499  | 5.355213  | 6  | -2.857813 | -0.361252 | 1.314175  |
| 6  | 2.129083  | 1.930722  | 0.368755  | 6  | -2.862750 | -0.977525 | 2.508666  |
| 6  | 2.778883  | 2.632872  | -0.658906 | 6  | -2.921627 | -2.467939 | 2.668383  |
| 6  | 2.874222  | 1.450046  | 1.455633  | 1  | -3.932661 | -2.799421 | 2.963857  |
| 6  | 4.151903  | 2.859459  | -0.593191 | 1  | -2.235073 | -2.789168 | 3.459024  |
| 1  | 2.215728  | 2.997731  | -1.511511 | 8  | -2.518538 | -3.136171 | 1.483174  |
| 6  | 4.249058  | 1.672743  | 1.511463  | 6  | -3.285704 | -2.674686 | 0.384257  |
| 1  | 2.389812  | 0.885221  | 2.243468  | 1  | -3.008438 | -3.272083 | -0.485651 |
| 6  | 4.890383  | 2.374522  | 0.489471  | 1  | -4.352038 | -2.829571 | 0.598323  |
| 1  | 4.645312  | 3.410985  | -1.387159 | 6  | -3.040787 | -1.182665 | 0.035553  |
| 1  | 4.817512  | 1.289822  | 2.352547  | 8  | -1.863124 | -1.088749 | -0.772095 |
| 1  | 5.960707  | 2.547827  | 0.537182  | 6  | -4.271359 | -0.757722 | -0.774802 |
| 6  | -2.312151 | 1.230221  | -1.447330 | 6  | -5.464887 | -0.426335 | -0.117835 |
| 8  | -3.619503 | 1.221701  | -1.737213 | 6  | -4.253371 | -0.784351 | -2.172153 |
| 6  | -2.792846 | -0.986940 | -1.469862 | 6  | -6.604391 | -0.089355 | -0.844044 |
| 6  | -4.086979 | -0.161599 | -1.722036 | 1  | -5.490331 | -0.409285 | 0.967778  |
| 7  | -1.754020 | 0.070690  | -1.304426 | 6  | -5.396657 | -0.446285 | -2.900788 |
| 6  | -5.035077 | -0.393901 | -0.526552 | 1  | -3.349767 | -1.076783 | -2.694319 |
| 1  | -5.285020 | 0.561950  | -0.055165 | 6  | -6.572244 | -0.092598 | -2.241013 |
| 1  | -5.977544 | -0.842593 | -0.857848 | 1  | -7.516833 | 0.178346  | -0.320401 |
| 6  | -4.272086 | -1.328087 | 0.385284  | 1  | -5.365599 | -0.466511 | -3.985790 |
| 6  | -4.660276 | -1.823655 | 1.629901  | 1  | -7.459030 | 0.172361  | -2.807782 |
| 6  | -3.056704 | -1.726529 | -0.178942 | 1  | -2.790639 | -0.393484 | 3.422692  |
| 6  | -3.820811 | -2.722427 | 2.293850  | 6  | 1.860720  | 1.674220  | 1.378477  |
| 1  | -5.603522 | -1.523041 | 2.076233  | 6  | 1.701241  | 0.681355  | 2.369827  |
| 6  | -2.231618 | -2.650842 | 0.461877  | 6  | 1.944616  | 0.984969  | 3.712390  |
| 6  | -2.618620 | -3.140388 | 1.710833  | 6  | 2.311087  | 2.280859  | 4.078396  |
| 1  | -4.113622 | -3.114144 | 3.263094  | 6  | 2.463177  | 3.264878  | 3.102157  |
| 1  | -1.310125 | -2.967395 | -0.011145 | 6  | 2.248066  | 2.960005  | 1.754852  |
| 1  | -1.986278 | -3.854557 | 2.228939  | 1  | 1.839414  | 0.207997  | 4.461122  |
| 1  | -4.553812 | -0.339208 | -2.690365 | 1  | 2.484460  | 2.516362  | 5.122947  |
| 1  | -2.486840 | -1.634242 | -2.292279 | 1  | 2.757525  | 4.270456  | 3.384418  |
| 6  | 1.484888  | -3.834975 | -1.354235 | 1  | 2.377855  | 3.724470  | 0.997194  |
| 1  | 2.574390  | -3.926601 | -1.323957 | 15 | 1.571478  | 1.220981  | -0.365684 |
| 1  | 1.122154  | -3.859435 | -0.324187 | 6  | 3.008459  | 0.228822  | -0.864656 |
| 6  | 0.863501  | -4.994823 | -2.155931 | 6  | 2.918726  | -0.492063 | -2.065893 |
| 1  | 1.237910  | -5.025848 | -3.183649 | 6  | 4.166118  | 0.147305  | -0.080199 |
| 1  | 1.111575  | -5.948070 | -1.682414 | 6  | 3.990526  | -1.275418 | -2.483170 |
| 1  | -0.224770 | -4.898813 | -2.190044 | 1  | 2.012759  | -0.447248 | -2.662067 |
|    |           |           |           | 6  | 5.229393  | -0.654011 | -0.498497 |
|    |           |           |           | 1  | 4.240324  | 0.704723  | 0.847159  |
|    |           |           |           | 6  | 5.142798  | -1.361112 | -1.698208 |
|    |           |           |           | 1  | 3.917048  | -1.836199 | -3.407649 |
|    |           |           |           | 1  | 6.126509  | -0.717427 | 0.109067  |
| 28 | -0.213061 | -0.013473 | -0.390801 | 1  | 5.971982  | -1.982289 | -2.021328 |
| 6  | -1.358003 | 3.019058  | 2.142994  | 6  | 1.589598  | 2.754545  | -1.325027 |
| 6  | -1.633986 | 1.653404  | 2.127477  | 6  | 0.489887  | 3.620527  | -1.220828 |
| 6  | -2.567668 | 1.097865  | 1.231626  | 6  | 2.665407  | 3.082294  | -2.160387 |
| 6  | -3.181998 | 1.968516  | 0.309915  | 6  | 0.473308  | 4.810448  | -1.942631 |
| 6  | -2.901860 | 3.335450  | 0.321403  | 1  | -0.337836 | 3.375184  | -0.564712 |

**(R)-TS6**

SCF Energy = -2606.397198

Gibbs Free Energy = -2605.741884



Gibbs Free Energy = -733.877236

|   |           |           |           |    |           |           |           |
|---|-----------|-----------|-----------|----|-----------|-----------|-----------|
|   |           |           |           | 6  | -1.596863 | 1.240916  | -0.743947 |
|   |           |           |           | 6  | -1.856348 | 1.221058  | -2.060711 |
| 1 | 1.351455  | 2.296173  | 1.760935  | 6  | -1.145616 | 0.258993  | -2.967900 |
| 6 | -1.217539 | -0.511726 | 0.283635  | 1  | -1.632446 | 0.202803  | -3.950221 |
| 6 | -0.812193 | 0.734509  | 0.040050  | 1  | -0.097624 | 0.535355  | -3.128519 |
| 6 | -1.544352 | 1.938550  | -0.529814 | 8  | -1.071835 | -1.077106 | -2.406793 |
| 1 | -1.954950 | 1.714783  | -1.526111 | 6  | -2.331905 | -1.618873 | -2.103092 |
| 1 | -2.362452 | 2.295276  | 0.101419  | 1  | -2.282216 | -2.700921 | -2.296028 |
| 8 | -0.582844 | 2.991355  | -0.625936 | 1  | -3.115197 | -1.212816 | -2.752419 |
| 6 | 0.700504  | 2.394412  | -0.659853 | 6  | -2.764227 | -1.472852 | -0.642318 |
| 1 | 1.441013  | 3.140938  | -0.353694 | 8  | -1.949026 | -1.202192 | 0.257950  |
| 1 | 0.960678  | 2.046935  | -1.671507 | 6  | -4.167803 | -1.709574 | -0.287985 |
| 6 | 0.617193  | 1.202370  | 0.313451  | 6  | -5.070223 | -2.340305 | -1.164653 |
| 8 | 0.610823  | 1.680815  | 1.664849  | 6  | -4.622104 | -1.236593 | 0.957831  |
| 6 | 1.692538  | 0.153901  | 0.084195  | 6  | -6.399158 | -2.507564 | -0.791584 |
| 6 | 1.845259  | -0.450160 | -1.172369 | 1  | -4.737687 | -2.718249 | -2.125398 |
| 6 | 2.541159  | -0.236361 | 1.122568  | 6  | -5.955326 | -1.391921 | 1.316754  |
| 6 | 2.837660  | -1.402008 | -1.388395 | 1  | -3.921786 | -0.728598 | 1.609894  |
| 1 | 1.168745  | -0.188773 | -1.980055 | 6  | -6.842603 | -2.030606 | 0.445654  |
| 6 | 3.536728  | -1.191863 | 0.908234  | 1  | -7.090886 | -3.005909 | -1.462320 |
| 1 | 2.401452  | 0.200459  | 2.104236  | 1  | -6.306754 | -1.013357 | 2.270813  |
| 6 | 3.692431  | -1.773828 | -0.347857 | 1  | -7.883268 | -2.154211 | 0.728461  |
| 1 | 2.941092  | -1.859114 | -2.367963 | 1  | -2.606934 | 1.874215  | -2.507181 |
| 1 | 4.186188  | -1.483702 | 1.728219  | 6  | 1.945988  | 1.815584  | 1.309664  |
| 1 | 4.465723  | -2.517193 | -0.515571 | 6  | 2.005638  | 0.885311  | 2.375334  |
| 1 | -0.449886 | -1.191338 | 0.653464  | 6  | 2.515210  | 1.284732  | 3.617117  |
| 6 | -2.564095 | -1.183769 | 0.103264  | 6  | 2.936991  | 2.598068  | 3.818893  |
| 6 | -2.453847 | -2.132836 | -1.110402 | 6  | 2.869410  | 3.516911  | 2.774175  |
| 1 | -3.379696 | -2.704964 | -1.238317 | 6  | 2.384189  | 3.123300  | 1.523953  |
| 1 | -2.269212 | -1.568612 | -2.029977 | 1  | 2.571532  | 0.561102  | 4.421370  |
| 1 | -1.631140 | -2.843537 | -0.981057 | 1  | 3.318990  | 2.897801  | 4.788882  |
| 6 | -3.731479 | -0.209111 | -0.112521 | 1  | 3.200512  | 4.539554  | 2.923321  |
| 1 | -4.673320 | -0.764612 | -0.168322 | 1  | 2.348618  | 3.838401  | 0.710406  |
| 1 | -3.812423 | 0.502019  | 0.714730  | 15 | 1.333052  | 1.254680  | -0.323460 |
| 1 | -3.629962 | 0.352526  | -1.044442 | 6  | 2.690857  | 0.204287  | -0.943487 |
| 6 | -2.844566 | -2.018072 | 1.371012  | 6  | 4.022439  | 0.464179  | -0.587190 |
| 1 | -2.923003 | -1.374608 | 2.252855  | 6  | 2.390196  | -0.872875 | -1.787871 |
| 1 | -3.783413 | -2.572311 | 1.266221  | 6  | 5.043635  | -0.349534 | -1.074654 |
| 1 | -2.043126 | -2.741756 | 1.552432  | 1  | 4.259375  | 1.295244  | 0.068936  |

**(S)-IM10**

SCF Energy = -2529.936845

Gibbs Free Energy = -2529.308693

|    |           |          |           |   |           |           |           |
|----|-----------|----------|-----------|---|-----------|-----------|-----------|
| 28 | -0.387422 | 0.042084 | 0.077743  | 1 | 3.178890  | -2.520159 | -2.915693 |
| 6  | -4.570059 | 2.792701 | 1.015064  | 1 | 5.538062  | -2.055100 | -2.294394 |
| 6  | -3.794222 | 2.132480 | 0.066242  | 6 | 1.301382  | 2.719498  | -1.401200 |
| 6  | -2.404592 | 1.978191 | 0.243811  | 6 | 0.395697  | 3.760951  | -1.138544 |
| 6  | -1.834107 | 2.480053 | 1.431012  | 6 | 2.145358  | 2.801074  | -2.517570 |
| 6  | -2.610558 | 3.144871 | 2.378310  | 6 | 0.350506  | 4.872688  | -1.974799 |
| 6  | -3.981891 | 3.305559 | 2.173948  | 1 | -0.272760 | 3.705247  | -0.287465 |
| 1  | -5.638750 | 2.899585 | 0.855127  | 6 | 2.084028  | 3.912464  | -3.359497 |
| 1  | -4.262345 | 1.709604 | -0.816450 | 1 | 2.846708  | 2.002357  | -2.729362 |
| 1  | -0.771294 | 2.350532 | 1.609451  | 6 | 1.190724  | 4.948386  | -3.088976 |
| 1  | -2.144868 | 3.533085 | 3.279087  | 1 | -0.347874 | 5.675734  | -1.762072 |
| 1  | -4.588826 | 3.816428 | 2.914636  | 1 | 2.738765  | 3.967485  | -4.223265 |
|    |           |          |           | 1 | 1.146990  | 5.813023  | -3.743605 |

|    |           |           |           |    |           |           |           |
|----|-----------|-----------|-----------|----|-----------|-----------|-----------|
| 6  | 1.560639  | -0.510732 | 2.224236  | 1  | -6.914715 | -2.070723 | -0.552580 |
| 8  | 2.059067  | -1.379134 | 3.117297  | 1  | -4.664638 | -4.070785 | 2.516126  |
| 6  | 0.596775  | -2.448180 | 1.586152  | 1  | -6.850724 | -3.457629 | 1.508847  |
| 6  | 1.558892  | -2.707521 | 2.783675  | 1  | -1.166589 | 1.173042  | -2.216207 |
| 7  | 0.737506  | -0.989267 | 1.347074  | 6  | 1.135047  | 2.021617  | 1.596126  |
| 6  | 2.701778  | -3.615628 | 2.282601  | 6  | 1.452173  | 1.041355  | 2.562576  |
| 1  | 3.657490  | -3.087251 | 2.364415  | 6  | 1.732785  | 1.422565  | 3.880720  |
| 1  | 2.783830  | -4.521467 | 2.891832  | 6  | 1.684586  | 2.764844  | 4.251641  |
| 6  | 2.330837  | -3.933026 | 0.851724  | 6  | 1.376494  | 3.734869  | 3.300816  |
| 6  | 2.997470  | -4.770809 | -0.041355 | 6  | 1.111401  | 3.364594  | 1.979871  |
| 6  | 1.142456  | -3.305042 | 0.469965  | 1  | 1.985843  | 0.660403  | 4.607712  |
| 6  | 2.452470  | -4.980604 | -1.309931 | 1  | 1.893373  | 3.048546  | 5.277504  |
| 1  | 3.919982  | -5.265691 | 0.247288  | 1  | 1.345920  | 4.783217  | 3.579365  |
| 6  | 0.594172  | -3.514109 | -0.792231 | 1  | 0.882593  | 4.129044  | 1.247399  |
| 6  | 1.255414  | -4.359607 | -1.683231 | 15 | 0.867994  | 1.516737  | -0.146423 |
| 1  | 2.958359  | -5.638846 | -2.009467 | 6  | 2.549169  | 1.308603  | -0.810151 |
| 1  | -0.317588 | -3.010452 | -1.080759 | 6  | 3.546854  | 2.263230  | -0.557094 |
| 1  | 0.840623  | -4.534839 | -2.671049 | 6  | 2.847982  | 0.170630  | -1.569619 |
| 1  | 1.067403  | -3.086881 | 3.679480  | 6  | 4.828344  | 2.077103  | -1.069060 |
| 1  | -0.455452 | -2.651086 | 1.800649  | 1  | 3.323628  | 3.141666  | 0.040182  |
|    |           |           |           | 6  | 4.134787  | -0.014203 | -2.074749 |
|    |           |           |           | 1  | 2.092659  | -0.586740 | -1.740941 |
|    |           |           |           | 6  | 5.122465  | 0.938720  | -1.826316 |
|    |           |           |           | 1  | 5.599486  | 2.815280  | -0.873581 |
|    |           |           |           | 1  | 4.360050  | -0.909981 | -2.642036 |
| 28 | -0.231827 | -0.404037 | -0.126161 | 1  | 6.125141  | 0.794606  | -2.216144 |
| 6  | -4.359475 | 2.635887  | -0.117656 | 6  | 0.158555  | 2.979519  | -0.961521 |
| 6  | -3.608809 | 1.721212  | -0.855795 | 6  | -1.020281 | 3.547032  | -0.450708 |
| 6  | -2.924120 | 0.682343  | -0.211770 | 6  | 0.729808  | 3.496968  | -2.133515 |
| 6  | -3.008468 | 0.566302  | 1.186525  | 6  | -1.604726 | 4.633395  | -1.097369 |
| 6  | -3.733617 | 1.499089  | 1.922216  | 1  | -1.479623 | 3.145452  | 0.446047  |
| 6  | -4.411986 | 2.535598  | 1.272589  | 6  | 0.130767  | 4.577761  | -2.780881 |
| 1  | -4.900374 | 3.425515  | -0.629423 | 1  | 1.640821  | 3.064358  | -2.531924 |
| 1  | -3.564034 | 1.802679  | -1.937013 | 6  | -1.032392 | 5.149114  | -2.262215 |
| 1  | -2.507331 | -0.256559 | 1.683397  | 1  | -2.513125 | 5.067714  | -0.693860 |
| 1  | -3.784557 | 1.409263  | 3.002547  | 1  | 0.578176  | 4.976867  | -3.685405 |
| 1  | -4.990566 | 3.250699  | 1.848601  | 1  | -1.492356 | 5.993918  | -2.764769 |
| 6  | -2.146341 | -0.286022 | -1.017070 | 6  | 1.537822  | -0.385649 | 2.220807  |
| 6  | -1.274302 | 0.112355  | -2.006286 | 8  | 2.254843  | -1.142650 | 3.056795  |
| 6  | -0.780307 | -0.816189 | -3.086679 | 6  | 1.366595  | -2.439953 | 1.275199  |
| 1  | -1.389077 | -0.600753 | -3.985630 | 6  | 2.299731  | -2.501613 | 2.517164  |
| 1  | 0.259884  | -0.599374 | -3.346997 | 7  | 0.999312  | -0.995729 | 1.214270  |
| 8  | -0.846112 | -2.182192 | -2.755957 | 6  | 3.720681  | -2.846905 | 2.022166  |
| 6  | -2.065227 | -2.547675 | -2.119635 | 1  | 4.405588  | -2.024858 | 2.256260  |
| 1  | -1.997734 | -3.618819 | -1.921935 | 1  | 4.107889  | -3.737892 | 2.526718  |
| 1  | -2.922446 | -2.360093 | -2.783316 | 6  | 3.556021  | -3.069934 | 0.535370  |
| 6  | -2.247182 | -1.806164 | -0.780441 | 6  | 4.526353  | -3.459827 | -0.386617 |
| 8  | -1.115322 | -2.007305 | 0.030798  | 6  | 2.233596  | -2.883024 | 0.123469  |
| 6  | -3.540632 | -2.251791 | -0.129676 | 6  | 4.150806  | -3.666582 | -1.716447 |
| 6  | -4.774878 | -1.913329 | -0.697083 | 1  | 5.555894  | -3.613583 | -0.077165 |
| 6  | -3.508481 | -3.031557 | 1.027820  | 6  | 1.845807  | -3.102909 | -1.197101 |
| 6  | -5.962357 | -2.344180 | -0.109226 | 6  | 2.820731  | -3.493874 | -2.118129 |
| 1  | -4.812412 | -1.294663 | -1.589799 | 1  | 4.896034  | -3.980256 | -2.441213 |
| 6  | -4.697761 | -3.465206 | 1.615499  | 1  | 0.815721  | -2.961446 | -1.504209 |
| 1  | -2.547593 | -3.283175 | 1.461703  | 1  | 2.539614  | -3.675828 | -3.150863 |
| 6  | -5.926024 | -3.122294 | 1.049933  | 1  | 1.946044  | -3.156986 | 3.312460  |

**(S)-IM11**

SCF Energy = -2529.946627

Gibbs Free Energy = -2529.313522

1 0.440370 -3.007809 1.359811  
**(S)-IM12**  
 SCF Energy = -2606.402369  
 Gibbs Free Energy = -2605.745834

28 -0.152474 -0.499942 -0.548913  
 6 -0.106697 -2.248089 2.865024  
 6 0.487853 -2.609338 1.658328  
 6 1.769044 -2.144619 1.299061  
 6 2.426293 -1.282940 2.192958  
 6 1.831005 -0.922160 3.402093  
 6 0.566031 -1.400493 3.745229  
 1 -1.096973 -2.617715 3.113324  
 1 -0.035977 -3.262751 0.968802  
 1 3.414522 -0.911486 1.961051  
 1 2.369858 -0.276632 4.089425  
 1 0.108865 -1.116518 4.687319  
 6 2.328670 -2.597131 -0.005175  
 6 2.204127 -3.883167 -0.375692  
 6 2.460748 -4.376542 -1.769762  
 1 3.412705 -4.934074 -1.823638  
 1 1.665382 -5.064419 -2.073169  
 8 2.461519 -3.314869 -2.712153  
 6 3.352760 -2.308262 -2.291099  
 1 3.442515 -1.578763 -3.099145  
 1 4.347664 -2.726416 -2.080831  
 6 2.839607 -1.581547 -1.026084  
 8 1.713779 -0.750124 -1.432728  
 6 3.982774 -0.690992 -0.573950  
 6 5.021113 -1.227499 0.199097  
 6 4.095821 0.620197 -1.047792  
 6 6.125170 -0.448398 0.539755  
 1 4.953991 -2.254865 0.545775  
 6 5.199205 1.402662 -0.700736  
 1 3.316337 1.029927 -1.678555  
 6 6.212705 0.874257 0.098166  
 1 6.917177 -0.873978 1.147764  
 1 5.266813 2.422949 -1.065595  
 1 7.071450 1.481783 0.365236  
 1 1.853942 -4.618694 0.344637  
 6 -2.635077 0.061288 1.536947  
 6 -1.699401 0.701992 2.375845  
 6 -2.029165 0.962829 3.712378  
 6 -3.263976 0.570707 4.223201  
 6 -4.186464 -0.073343 3.398946  
 6 -3.873583 -0.321462 2.061555  
 1 -1.306284 1.464337 4.343847  
 1 -3.504256 0.768687 5.262381  
 1 -5.150717 -0.378984 3.791536  
 1 -4.595418 -0.816276 1.421690  
 15 -2.243436 -0.247892 -0.214691  
 6 -2.736744 1.225286 -1.151897  
 6 -3.339295 2.329816 -0.537945  
 6 -2.413136 1.261899 -2.519439  
 6 -3.618437 3.470190 -1.291849

1 -3.586473 2.303751 0.517902  
 6 -2.713348 2.398554 -3.264874  
 1 -1.918028 0.408815 -2.974161  
 6 -3.308768 3.504247 -2.651755  
 1 -4.080917 4.329080 -0.816373  
 1 -2.470834 2.426947 -4.322446  
 1 -3.529408 4.393014 -3.234305  
 6 -3.311329 -1.632808 -0.699094  
 6 -3.048802 -2.897523 -0.146275  
 6 -4.370712 -1.469737 -1.598636  
 6 -3.841900 -3.987595 -0.493724  
 1 -2.233076 -3.019438 0.559671  
 6 -5.160491 -2.567961 -1.944136  
 1 -4.573444 -0.495495 -2.029029  
 6 -4.897486 -3.823223 -1.395734  
 1 -3.638805 -4.963339 -0.064095  
 1 -5.980424 -2.440180 -2.643334  
 1 -5.512975 -4.674101 -1.669188  
 6 -0.385106 1.136231 1.884874  
 8 0.214584 2.088058 2.610947  
 6 1.432303 1.618628 0.658087  
 6 1.509079 2.390728 1.996454  
 7 0.249543 0.739684 0.827824  
 6 1.605693 3.886123 1.666995  
 1 0.958326 4.472817 2.325413  
 1 2.631985 4.236655 1.828496  
 6 1.221269 3.962130 0.205620  
 6 0.951716 5.093720 -0.561839  
 6 1.173143 2.691054 -0.376313  
 6 0.628282 4.934124 -1.911521  
 1 0.986765 6.084919 -0.119514  
 6 0.858376 2.526604 -1.724356  
 6 0.582738 3.661198 -2.489186  
 1 0.410079 5.807616 -2.517855  
 1 0.818868 1.537906 -2.168957  
 1 0.325385 3.553095 -3.537548  
 1 2.272067 2.030828 2.687344  
 1 2.308364 1.009039 0.455447  
 8 -0.535378 -1.443798 -2.062641  
 1 -0.997142 -2.277978 -1.910874  
 1 1.142447 -1.293035 -2.051199

**(S)-IM1A**  
 SCF Energy = -2529.93428  
 Gibbs Free Energy = -2529.306659

28 -0.106977 -0.245480 0.408694  
 6 -2.851221 0.498286 0.616385  
 6 -1.832710 0.195256 -0.206435  
 6 -1.940410 -0.012518 -1.683900  
 1 -2.976326 -0.114466 -2.035583  
 1 -1.463867 0.790760 -2.255833  
 8 -1.203351 -1.207371 -2.056992  
 6 -1.798898 -2.388688 -1.599245  
 1 -1.487190 -3.191129 -2.278729  
 1 -2.897290 -2.333106 -1.646030

|    |           |           |           |    |           |           |           |
|----|-----------|-----------|-----------|----|-----------|-----------|-----------|
| 6  | -1.410085 | -2.826199 | -0.187468 | 6  | 2.803050  | -2.186422 | -0.532253 |
| 8  | -0.665248 | -2.142250 | 0.535127  | 6  | 4.099543  | -2.487213 | -2.967288 |
| 6  | -1.905736 | -4.116048 | 0.315264  | 1  | 5.940425  | -2.433785 | -1.840919 |
| 6  | -2.677174 | -4.981360 | -0.482896 | 6  | 2.043806  | -2.287857 | -1.696031 |
| 6  | -1.606756 | -4.482821 | 1.641092  | 6  | 2.702275  | -2.442173 | -2.916595 |
| 6  | -3.133250 | -6.188579 | 0.036077  | 1  | 4.600605  | -2.606152 | -3.922897 |
| 1  | -2.924672 | -4.723083 | -1.506052 | 1  | 0.964369  | -2.212815 | -1.664298 |
| 6  | -2.064887 | -5.689150 | 2.154292  | 1  | 2.125259  | -2.522275 | -3.832824 |
| 1  | -1.023816 | -3.803024 | 2.251630  | 1  | 3.607145  | -2.617985 | 2.612727  |
| 6  | -2.827563 | -6.543801 | 1.352106  | 1  | 1.607927  | -2.787317 | 1.192087  |
| 1  | -3.726339 | -6.852698 | -0.583424 | 1  | -2.662263 | 0.502919  | 1.691526  |
| 1  | -1.834666 | -5.965927 | 3.177793  | 6  | -4.226264 | 0.862615  | 0.228111  |
| 1  | -3.186156 | -7.486208 | 1.753785  | 6  | -5.314498 | 0.438659  | 1.009998  |
| 6  | 1.432379  | 2.306833  | 1.683980  | 6  | -4.483588 | 1.671612  | -0.892391 |
| 6  | 2.307160  | 1.398172  | 2.325630  | 6  | -6.619416 | 0.774911  | 0.659600  |
| 6  | 3.056094  | 1.819198  | 3.432465  | 1  | -5.128355 | -0.167484 | 1.892847  |
| 6  | 2.931327  | 3.118730  | 3.919592  | 6  | -5.790250 | 2.009310  | -1.242443 |
| 6  | 2.067716  | 4.013465  | 3.292461  | 1  | -3.651940 | 2.074996  | -1.460341 |
| 6  | 1.329720  | 3.609798  | 2.176787  | 6  | -6.862638 | 1.556769  | -0.472868 |
| 1  | 3.731526  | 1.118641  | 3.908116  | 1  | -7.448509 | 0.430958  | 1.270506  |
| 1  | 3.509948  | 3.428229  | 4.783312  | 1  | -5.969809 | 2.639364  | -2.108496 |
| 1  | 1.969119  | 5.029083  | 3.661813  | 1  | -7.879593 | 1.823024  | -0.743229 |
| 1  | 0.671990  | 4.316712  | 1.685217  |    |           |           |           |
| 15 | 0.535511  | 1.786877  | 0.172832  |    |           |           |           |
| 6  | 1.807686  | 1.879501  | -1.132042 |    |           |           |           |
| 6  | 2.830174  | 2.838419  | -1.076871 |    |           |           |           |
| 6  | 1.747691  | 0.983546  | -2.207855 |    |           |           |           |
| 6  | 3.782168  | 2.897690  | -2.092285 | 28 | -0.085193 | -0.594238 | 0.310016  |
| 1  | 2.884416  | 3.530624  | -0.243194 | 6  | -2.467603 | -0.838560 | 0.329556  |
| 6  | 2.703258  | 1.049478  | -3.221054 | 6  | -1.787580 | -1.372681 | -0.732618 |
| 1  | 0.970540  | 0.228347  | -2.245352 | 6  | -1.736576 | -1.016934 | -2.194959 |
| 6  | 3.719236  | 2.003515  | -3.164068 | 1  | -2.653932 | -1.355551 | -2.707786 |
| 1  | 4.573762  | 3.638782  | -2.046176 | 1  | -1.596910 | 0.045984  | -2.405315 |
| 1  | 2.662089  | 0.342947  | -4.042519 | 8  | -0.602963 | -1.734768 | -2.677151 |
| 1  | 4.465478  | 2.048909  | -3.950961 | 6  | -0.650578 | -3.012764 | -2.028263 |
| 6  | -0.658874 | 3.107944  | -0.197269 | 1  | 0.336111  | -3.471740 | -2.087475 |
| 6  | -0.666372 | 3.732556  | -1.450455 | 1  | -1.388523 | -3.654474 | -2.525647 |
| 6  | -1.650689 | 3.428591  | 0.744442  | 6  | -1.056704 | -2.732342 | -0.557374 |
| 6  | -1.656029 | 4.670369  | -1.756221 | 8  | 0.044797  | -2.410698 | 0.238760  |
| 1  | 0.095365  | 3.491559  | -2.183456 | 6  | -1.921767 | -3.818317 | 0.058277  |
| 6  | -2.627510 | 4.369843  | 0.437933  | 6  | -3.129990 | -4.201390 | -0.540361 |
| 1  | -1.663362 | 2.934170  | 1.709776  | 6  | -1.531714 | -4.424911 | 1.254022  |
| 6  | -2.633316 | 4.990006  | -0.815286 | 6  | -3.930215 | -5.179384 | 0.045184  |
| 1  | -1.656488 | 5.151273  | -2.729138 | 1  | -3.456645 | -3.729715 | -1.463688 |
| 1  | -3.393763 | 4.607999  | 1.167968  | 6  | -2.330891 | -5.410202 | 1.838111  |
| 1  | -3.402533 | 5.716827  | -1.055607 | 1  | -0.600585 | -4.116521 | 1.714229  |
| 6  | 2.484455  | 0.012172  | 1.862016  | 6  | -3.530176 | -5.789494 | 1.236955  |
| 8  | 3.611614  | -0.593643 | 2.264855  | 1  | -4.864483 | -5.466682 | -0.427107 |
| 6  | 2.313063  | -2.011534 | 0.887172  | 1  | -2.014941 | -5.880332 | 2.764468  |
| 6  | 3.610610  | -1.957733 | 1.744515  | 1  | -4.151818 | -6.554154 | 1.691845  |
| 7  | 1.680823  | -0.689948 | 1.130279  | 6  | 0.809424  | 2.432229  | 1.440932  |
| 6  | 4.809234  | -2.183833 | 0.805546  | 6  | 1.697542  | 1.738443  | 2.293880  |
| 1  | 5.538868  | -1.376406 | 0.922319  | 6  | 2.259351  | 2.393747  | 3.399337  |
| 1  | 5.323473  | -3.118216 | 1.055909  | 6  | 1.955672  | 3.726224  | 3.664338  |
| 6  | 4.199127  | -2.243968 | -0.576687 | 6  | 1.105872  | 4.422775  | 2.808685  |
| 6  | 4.856268  | -2.388684 | -1.797904 | 6  | 0.543543  | 3.779922  | 1.704051  |

**(S)-IM2A**

SCF Energy = -2529.933024

Gibbs Free Energy = -2529.299911

|    |           |           |           |    |           |           |           |
|----|-----------|-----------|-----------|----|-----------|-----------|-----------|
| 1  | 2.940992  | 1.849824  | 4.040995  | 1  | -5.486393 | 1.720975  | 2.677442  |
| 1  | 2.392344  | 4.218147  | 4.526792  | 1  | -5.684411 | 1.904273  | -1.615559 |
| 1  | 0.879552  | 5.468101  | 2.992124  | 1  | -6.572847 | 2.563351  | 0.606557  |
| 1  | -0.107178 | 4.337528  | 1.042769  |    |           |           |           |
| 15 | 0.113582  | 1.592917  | -0.033350 |    |           |           |           |
| 6  | 1.400916  | 1.799294  | -1.312926 |    |           |           |           |
| 6  | 2.310597  | 2.865729  | -1.261266 |    |           |           |           |
| 6  | 1.445897  | 0.894833  | -2.383695 |    |           |           |           |
| 6  | 3.253354  | 3.024662  | -2.274675 | 28 | -0.093557 | 0.251533  | -1.091209 |
| 1  | 2.286323  | 3.566786  | -0.434350 | 6  | -2.070826 | -1.098634 | 1.071388  |
| 6  | 2.382907  | 1.071221  | -3.401402 | 6  | -1.043432 | -0.942100 | 2.028350  |
| 1  | 0.773219  | 0.044607  | -2.424938 | 6  | -1.054426 | -1.708739 | 3.197111  |
| 6  | 3.287703  | 2.130897  | -3.347463 | 6  | -2.058705 | -2.652079 | 3.404980  |
| 1  | 3.959380  | 3.847574  | -2.227773 | 6  | -3.066809 | -2.818934 | 2.457976  |
| 1  | 2.412594  | 0.368099  | -4.227068 | 6  | -3.076643 | -2.039866 | 1.298183  |
| 1  | 4.022659  | 2.258643  | -4.135754 | 1  | -0.260815 | -1.580829 | 3.921984  |
| 6  | -1.264434 | 2.657298  | -0.575852 | 1  | -2.047206 | -3.257996 | 4.304090  |
| 6  | -1.395629 | 3.002654  | -1.928373 | 1  | -3.851484 | -3.550876 | 2.619353  |
| 6  | -2.199625 | 3.139173  | 0.354392  | 1  | -3.871594 | -2.161558 | 0.571188  |
| 6  | -2.438264 | 3.834222  | -2.339612 | 15 | -2.100362 | -0.007138 | -0.390171 |
| 1  | -0.672232 | 2.646804  | -2.653722 | 6  | -2.768798 | 1.575753  | 0.193911  |
| 6  | -3.217860 | 3.992677  | -0.057987 | 6  | -3.558181 | 1.661545  | 1.349280  |
| 1  | -2.123151 | 2.863518  | 1.399789  | 6  | -2.445134 | 2.734349  | -0.528407 |
| 6  | -3.339798 | 4.341676  | -1.404968 | 6  | -4.023093 | 2.904786  | 1.776332  |
| 1  | -2.528693 | 4.102089  | -3.387410 | 1  | -3.802613 | 0.767036  | 1.912504  |
| 1  | -3.925125 | 4.372869  | 0.670605  | 6  | -2.917308 | 3.971215  | -0.095865 |
| 1  | -4.136888 | 5.005833  | -1.723426 | 1  | -1.817440 | 2.664736  | -1.410442 |
| 6  | 2.128858  | 0.358075  | 2.031203  | 6  | -3.702702 | 4.057075  | 1.055450  |
| 8  | 3.234689  | -0.022003 | 2.679686  | 1  | -4.633470 | 2.973280  | 2.671090  |
| 6  | 2.497180  | -1.714027 | 1.217732  | 1  | -2.656877 | 4.866875  | -0.648168 |
| 6  | 3.494130  | -1.430557 | 2.368300  | 1  | -4.062832 | 5.023450  | 1.393875  |
| 7  | 1.598153  | -0.524784 | 1.243866  | 6  | -3.285592 | -0.745828 | -1.545715 |
| 6  | 4.915078  | -1.595881 | 1.813853  | 6  | -2.941820 | -1.952976 | -2.178965 |
| 1  | 5.558906  | -0.776309 | 2.147266  | 6  | -4.511037 | -0.131545 | -1.830114 |
| 1  | 5.357265  | -2.525249 | 2.191202  | 6  | -3.822110 | -2.539563 | -3.084132 |
| 6  | 4.718407  | -1.650611 | 0.315623  | 1  | -1.991468 | -2.430826 | -1.957354 |
| 6  | 5.691230  | -1.655532 | -0.682225 | 6  | -5.386844 | -0.723947 | -2.741311 |
| 6  | 3.364551  | -1.756066 | -0.020197 | 1  | -4.775873 | 0.801877  | -1.345725 |
| 6  | 5.290889  | -1.772650 | -2.015266 | 6  | -5.044632 | -1.922963 | -3.366985 |
| 1  | 6.744477  | -1.574959 | -0.430159 | 1  | -3.554578 | -3.470918 | -3.572520 |
| 6  | 2.961061  | -1.881501 | -1.346868 | 1  | -6.335338 | -0.245713 | -2.962807 |
| 6  | 3.936583  | -1.888553 | -2.344622 | 1  | -5.727342 | -2.377496 | -4.077508 |
| 1  | 6.038968  | -1.779502 | -2.801838 | 6  | 0.032817  | 0.036119  | 1.830598  |
| 1  | 1.910047  | -1.958102 | -1.591796 | 8  | 0.630255  | 0.503034  | 2.934063  |
| 1  | 3.641878  | -1.985461 | -3.384739 | 6  | 1.509760  | 1.523312  | 0.980082  |
| 1  | 3.307048  | -1.986844 | 3.288480  | 6  | 1.542648  | 1.573805  | 2.532864  |
| 1  | 1.889446  | -2.607262 | 1.346627  | 7  | 0.465841  | 0.503140  | 0.704096  |
| 1  | -2.351903 | -1.385432 | 1.266044  | 6  | 1.000825  | 2.954384  | 2.964732  |
| 6  | -3.500760 | 0.188340  | 0.358889  | 1  | 0.079907  | 2.826148  | 3.543512  |
| 6  | -4.009488 | 0.578158  | 1.613291  | 1  | 1.714719  | 3.474991  | 3.610912  |
| 6  | -4.114559 | 0.688661  | -0.805240 | 6  | 0.771526  | 3.693980  | 1.664444  |
| 6  | -5.099348 | 1.437037  | 1.704288  | 6  | 0.334095  | 5.005683  | 1.488000  |
| 1  | -3.552012 | 0.181036  | 2.515253  | 6  | 1.087234  | 2.906907  | 0.553643  |
| 6  | -5.212033 | 1.535512  | -0.711452 | 6  | 0.223482  | 5.513992  | 0.191443  |
| 1  | -3.755818 | 0.397850  | -1.783588 | 1  | 0.090881  | 5.628810  | 2.343404  |
| 6  | -5.709202 | 1.909320  | 0.539933  | 6  | 0.979938  | 3.407881  | -0.743271 |

**(S)-IM3A**

SCF Energy = -2606.397476

Gibbs Free Energy = -2605.743498

|    |           |           |           |    |           |           |           |
|----|-----------|-----------|-----------|----|-----------|-----------|-----------|
| 6  | 0.545239  | 4.723237  | -0.916996 | 1  | -3.591762 | -0.048351 | -2.282407 |
| 1  | -0.107990 | 6.537127  | 0.043478  | 1  | -3.407517 | 1.661792  | -1.876344 |
| 1  | 1.226648  | 2.788875  | -1.599007 | 6  | -3.183761 | 0.310839  | -0.229193 |
| 1  | 0.461317  | 5.135180  | -1.917682 | 8  | -2.232018 | -0.022270 | 0.495216  |
| 1  | 2.511705  | 1.331743  | 2.967710  | 6  | -4.541362 | 0.335354  | 0.333281  |
| 1  | 2.444395  | 1.198034  | 0.521392  | 6  | -5.671837 | 0.602409  | -0.461201 |
| 8  | -0.538178 | 0.309009  | -2.837640 | 6  | -4.705006 | 0.098404  | 1.711114  |
| 1  | -1.256071 | -0.260336 | -3.137298 | 6  | -6.938360 | 0.625677  | 0.113328  |
| 1  | 1.200285  | 0.215417  | -2.822234 | 1  | -5.573454 | 0.789330  | -1.524437 |
| 6  | 2.184838  | -2.004901 | 0.215781  | 6  | -5.971709 | 0.124638  | 2.279858  |
| 6  | 2.118453  | -1.827577 | -1.111342 | 1  | -3.825771 | -0.092450 | 2.315580  |
| 6  | 1.457246  | -2.673945 | -2.179659 | 6  | -7.089540 | 0.387058  | 1.481540  |
| 1  | 1.777253  | -3.724164 | -2.105493 | 1  | -7.807295 | 0.829748  | -0.503035 |
| 1  | 0.362455  | -2.647254 | -2.140237 | 1  | -6.093092 | -0.054218 | 3.343077  |
| 8  | 1.838458  | -2.105673 | -3.434808 | 1  | -8.079224 | 0.408253  | 1.926661  |
| 6  | 2.994043  | -1.306293 | -3.221218 | 6  | 2.728816  | -0.258221 | 1.566139  |
| 1  | 3.074062  | -0.577220 | -4.030988 | 6  | 2.230072  | -1.403366 | 2.229465  |
| 1  | 3.912196  | -1.909748 | -3.185967 | 6  | 2.961704  | -1.969688 | 3.284109  |
| 6  | 2.762495  | -0.661356 | -1.847094 | 6  | 4.169564  | -1.411228 | 3.693049  |
| 8  | 1.738334  | 0.377413  | -2.000950 | 6  | 4.664727  | -0.284657 | 3.041168  |
| 6  | 4.003465  | -0.043052 | -1.248983 | 6  | 3.949536  | 0.281668  | 1.984357  |
| 6  | 5.010100  | -0.861776 | -0.717033 | 1  | 2.571808  | -2.849764 | 3.779848  |
| 6  | 4.203583  | 1.342397  | -1.280750 | 1  | 4.719150  | -1.857208 | 4.515039  |
| 6  | 6.181800  | -0.303661 | -0.209165 | 1  | 5.607662  | 0.156336  | 3.347908  |
| 1  | 4.873664  | -1.937909 | -0.695491 | 1  | 4.346491  | 1.155872  | 1.483010  |
| 6  | 5.374354  | 1.899908  | -0.764427 | 15 | 1.846390  | 0.449999  | 0.117051  |
| 1  | 3.440933  | 1.981389  | -1.706971 | 6  | 2.468415  | -0.543629 | -1.283110 |
| 6  | 6.365304  | 1.080319  | -0.224997 | 6  | 3.829940  | -0.868371 | -1.388708 |
| 1  | 6.951184  | -0.951100 | 0.199501  | 6  | 1.568390  | -0.993980 | -2.257295 |
| 1  | 5.511769  | 2.976376  | -0.792481 | 6  | 4.281489  | -1.630680 | -2.462780 |
| 1  | 7.276730  | 1.514264  | 0.173592  | 1  | 4.531720  | -0.533019 | -0.632189 |
| 1  | 2.808813  | -1.301291 | 0.762475  | 6  | 2.025432  | -1.763666 | -3.327057 |
| 6  | 1.549522  | -3.021989 | 1.052523  | 1  | 0.514584  | -0.758324 | -2.173409 |
| 6  | 2.023604  | -3.186242 | 2.367565  | 6  | 3.379308  | -2.080153 | -3.431695 |
| 6  | 0.478693  | -3.830499 | 0.627337  | 1  | 5.334756  | -1.880316 | -2.541620 |
| 6  | 1.475336  | -4.143615 | 3.216159  | 1  | 1.319119  | -2.124149 | -4.067225 |
| 1  | 2.842526  | -2.561523 | 2.713896  | 1  | 3.734099  | -2.680969 | -4.263133 |
| 6  | -0.076052 | -4.780699 | 1.479666  | 6  | 2.568919  | 2.110160  | -0.081419 |
| 1  | 0.061084  | -3.704793 | -0.363231 | 6  | 3.112013  | 2.519516  | -1.303932 |
| 6  | 0.424341  | -4.948514 | 2.772690  | 6  | 2.519903  | 3.012971  | 0.993176  |
| 1  | 1.868659  | -4.264337 | 4.220735  | 6  | 3.611183  | 3.816446  | -1.447147 |
| 1  | -0.904010 | -5.391962 | 1.134749  | 1  | 3.154958  | 1.829030  | -2.138885 |
| 1  | -0.004583 | -5.697976 | 3.430218  | 6  | 3.030724  | 4.299036  | 0.849825  |
|    |           |           |           | 1  | 2.091207  | 2.706128  | 1.942037  |
|    |           |           |           | 6  | 3.576638  | 4.703834  | -0.372806 |
|    |           |           |           | 1  | 4.032556  | 4.127081  | -2.397755 |
|    |           |           |           | 1  | 3.000466  | 4.987822  | 1.688011  |
|    |           |           |           | 1  | 3.971411  | 5.708544  | -0.484142 |
| 28 | -0.269430 | 0.192744  | 0.315609  | 6  | 0.968289  | -2.059505 | 1.852401  |
| 6  | -0.680576 | 2.999648  | 0.285883  | 8  | 0.807210  | -3.304462 | 2.328633  |
| 6  | -0.588451 | 1.892952  | -0.459252 | 6  | -1.014918 | -2.663481 | 0.979856  |
| 6  | -0.885873 | 1.755855  | -1.921465 | 6  | -0.515880 | -3.779584 | 1.938060  |
| 1  | -1.419102 | 2.610719  | -2.353635 | 7  | -0.000592 | -1.587165 | 1.136117  |
| 1  | 0.029130  | 1.602547  | -2.502780 | 6  | -0.403672 | -5.082561 | 1.131570  |
| 8  | -1.672941 | 0.563500  | -2.171088 | 1  | 0.561531  | -5.564577 | 1.314174  |
| 6  | -2.987929 | 0.660097  | -1.702139 | 1  | -1.179812 | -5.790421 | 1.444210  |

**(S)-IM5B**

SCF Energy = -2456.134903

Gibbs Free Energy = -2455.474575



|    |           |           |           |    |           |           |           |
|----|-----------|-----------|-----------|----|-----------|-----------|-----------|
| 6  | -0.602871 | -4.649462 | -0.303055 | 6  | 3.269689  | 0.846632  | 3.318495  |
| 6  | -0.488540 | -5.422355 | -1.457733 | 6  | 3.866697  | 2.084269  | 3.541992  |
| 6  | -0.987835 | -3.307735 | -0.389142 | 6  | 3.621755  | 3.137057  | 2.663841  |
| 6  | -0.771223 | -4.838897 | -2.694550 | 6  | 2.752795  | 2.959577  | 1.585528  |
| 1  | -0.188557 | -6.464367 | -1.398575 | 1  | 3.485594  | 0.010403  | 3.971304  |
| 6  | -1.280645 | -2.724115 | -1.619811 | 1  | 4.534074  | 2.216491  | 4.386724  |
| 6  | -1.168995 | -3.500136 | -2.774776 | 1  | 4.106064  | 4.097103  | 2.809412  |
| 1  | -0.686736 | -5.431505 | -3.600075 | 1  | 2.581463  | 3.783103  | 0.903973  |
| 1  | -1.557616 | -1.679729 | -1.690070 | 15 | 0.975762  | 1.500221  | -0.046352 |
| 1  | -1.391710 | -3.059471 | -3.741852 | 6  | 2.046611  | 0.879933  | -1.392273 |
| 1  | -1.092707 | -3.881360 | 2.858966  | 6  | 3.442272  | 0.988617  | -1.328266 |
| 1  | -1.992267 | -2.256551 | 1.243286  | 6  | 1.442121  | 0.283057  | -2.510207 |
| 1  | -0.420506 | 2.896921  | 1.340874  | 6  | 4.224831  | 0.509574  | -2.378054 |
| 6  | -1.081162 | 4.428324  | -0.103046 | 1  | 3.918900  | 1.441325  | -0.466092 |
| 6  | -0.223822 | 4.958228  | -1.270575 | 6  | 2.232598  | -0.170766 | -3.564622 |
| 1  | -0.390170 | 4.400989  | -2.195747 | 1  | 0.365078  | 0.150423  | -2.559102 |
| 1  | -0.467571 | 6.007231  | -1.471809 | 6  | 3.622081  | -0.063973 | -3.498677 |
| 1  | 0.839908  | 4.894826  | -1.029950 | 1  | 5.305657  | 0.589374  | -2.321293 |
| 6  | -2.579394 | 4.491375  | -0.468281 | 1  | 1.758969  | -0.624204 | -4.429506 |
| 1  | -3.196817 | 4.094232  | 0.343996  | 1  | 4.235192  | -0.431952 | -4.315050 |
| 1  | -2.886722 | 5.526531  | -0.652592 | 6  | 0.457857  | 3.176269  | -0.565559 |
| 1  | -2.802260 | 3.918888  | -1.373536 | 6  | 0.291341  | 3.448694  | -1.932389 |
| 6  | -0.839213 | 5.333293  | 1.120560  | 6  | 0.136138  | 4.170230  | 0.373473  |
| 1  | 0.216156  | 5.317049  | 1.411281  | 6  | -0.199335 | 4.686965  | -2.347215 |
| 1  | -1.113024 | 6.369284  | 0.898792  | 1  | 0.555733  | 2.702959  | -2.673327 |
| 1  | -1.433620 | 5.002904  | 1.979297  | 6  | -0.335133 | 5.411593  | -0.047922 |
|    |           |           |           | 1  | 0.259124  | 3.984362  | 1.433450  |
|    |           |           |           | 6  | -0.512176 | 5.670445  | -1.408219 |
|    |           |           |           | 1  | -0.323945 | 4.884891  | -3.406876 |
|    |           |           |           | 1  | -0.569863 | 6.173559  | 0.688257  |
|    |           |           |           | 1  | -0.886285 | 6.635342  | -1.734406 |
| 28 | -0.452904 | -0.184579 | 0.289056  | 6  | 1.907815  | -0.708943 | 1.993569  |
| 6  | -2.775310 | 0.739913  | 0.606112  | 8  | 2.568379  | -1.668497 | 2.650034  |
| 6  | -2.541248 | 0.157359  | -0.599309 | 6  | 1.015419  | -2.602726 | 1.153310  |
| 6  | -2.423415 | 0.674556  | -2.010978 | 6  | 1.948154  | -2.960064 | 2.334544  |
| 1  | -3.421135 | 0.851512  | -2.445269 | 7  | 0.966216  | -1.113153 | 1.197538  |
| 1  | -1.831602 | 1.582804  | -2.122884 | 6  | 3.010533  | -3.935784 | 1.814985  |
| 8  | -1.759976 | -0.386172 | -2.699831 | 1  | 3.998558  | -3.683153 | 2.211281  |
| 6  | -2.329399 | -1.601543 | -2.198528 | 1  | 2.778272  | -4.952162 | 2.154312  |
| 1  | -1.648114 | -2.423183 | -2.419099 | 6  | 2.902037  | -3.819460 | 0.311160  |
| 1  | -3.297940 | -1.784967 | -2.680225 | 6  | 3.746970  | -4.350379 | -0.661283 |
| 6  | -2.495279 | -1.400843 | -0.668554 | 6  | 1.758379  | -3.106333 | -0.063697 |
| 8  | -1.342198 | -1.762936 | 0.036384  | 6  | 3.431013  | -4.156660 | -2.008118 |
| 6  | -3.745674 | -2.046266 | -0.093159 | 1  | 4.636127  | -4.906824 | -0.380066 |
| 6  | -5.012994 | -1.733440 | -0.604973 | 6  | 1.433892  | -2.918266 | -1.404281 |
| 6  | -3.647843 | -2.922615 | 0.989103  | 6  | 2.282939  | -3.447850 | -2.376713 |
| 6  | -6.160000 | -2.291511 | -0.045708 | 1  | 4.081623  | -4.563754 | -2.775807 |
| 1  | -5.110768 | -1.043436 | -1.439170 | 1  | 0.546009  | -2.360915 | -1.673774 |
| 6  | -4.797312 | -3.487338 | 1.546587  | 1  | 2.052214  | -3.306769 | -3.427549 |
| 1  | -2.666388 | -3.153186 | 1.385414  | 1  | 1.441905  | -3.288627 | 3.244059  |
| 6  | -6.054610 | -3.173643 | 1.032794  | 1  | 0.000716  | -2.987308 | 1.231887  |
| 1  | -7.135337 | -2.040164 | -0.450760 | 1  | -2.853613 | 0.032647  | 1.434685  |
| 1  | -4.708365 | -4.172471 | 2.384260  | 6  | -3.207313 | 2.132921  | 0.982487  |
| 1  | -6.947754 | -3.611261 | 1.467274  | 6  | -3.136223 | 3.141998  | -0.170264 |
| 6  | 2.106359  | 1.737594  | 1.372261  | 1  | -3.807091 | 2.853128  | -0.984744 |
| 6  | 2.396341  | 0.656801  | 2.237305  | 1  | -3.454797 | 4.127406  | 0.180408  |

**(S)-IM6B**

SCF Energy = -2456.128167

Gibbs Free Energy = -2455.461877

|   |           |          |           |   |           |           |           |
|---|-----------|----------|-----------|---|-----------|-----------|-----------|
| 1 | -2.128867 | 3.245049 | -0.568329 | 6 | -4.540353 | -0.721266 | -2.749518 |
| 6 | -4.689163 | 1.977395 | 1.420137  | 6 | -2.176982 | -1.028703 | -3.238412 |
| 1 | -4.791181 | 1.278193 | 2.255302  | 6 | -4.806486 | -1.974690 | -3.286851 |
| 1 | -5.076230 | 2.949851 | 1.739812  | 1 | -5.352454 | -0.143961 | -2.323501 |
| 1 | -5.308901 | 1.613814 | 0.595517  | 6 | -2.448870 | -2.282309 | -3.772959 |
| 6 | -2.382278 | 2.593655 | 2.200246  | 1 | -1.155434 | -0.666828 | -3.198184 |
| 1 | -1.316939 | 2.625018 | 1.966445  | 6 | -3.762573 | -2.755168 | -3.794322 |
| 1 | -2.695209 | 3.592669 | 2.517716  | 1 | -5.823103 | -2.354767 | -3.291826 |
| 1 | -2.520821 | 1.910504 | 3.044318  | 1 | -1.622214 | -2.894023 | -4.114019 |

**(S)-IM6D**

SCF Energy = -3424.953181

Gibbs Free Energy = -3424.203516

|    |           |           |           |    |           |           |           |
|----|-----------|-----------|-----------|----|-----------|-----------|-----------|
| 28 | -0.781330 | 0.580297  | -0.104347 | 6  | 4.495202  | -1.037808 | 1.765044  |
| 8  | 1.162350  | -0.869602 | -2.845007 | 6  | 3.666164  | -1.407019 | 2.820660  |
| 16 | 0.975229  | -2.035868 | -1.932476 | 6  | 2.325601  | -1.022323 | 2.818869  |
| 8  | 0.300310  | -3.199293 | -2.552777 | 1  | 4.611410  | -0.015161 | -0.120311 |
| 8  | 0.371935  | -1.652560 | -0.609107 | 1  | 5.535657  | -1.343480 | 1.746932  |
| 6  | 2.635376  | -2.564586 | -1.486781 | 1  | 4.053953  | -1.999883 | 3.643468  |
| 6  | 3.738713  | -2.096227 | -2.193440 | 1  | 1.683935  | -1.322528 | 3.638659  |
| 6  | 2.806538  | -3.442617 | -0.414130 | 15 | 0.044815  | 0.292518  | 1.843977  |
| 6  | 5.020614  | -2.505360 | -1.820281 | 6  | 0.240132  | 1.856479  | 2.778605  |
| 1  | 3.581485  | -1.406888 | -3.014696 | 6  | 0.587110  | 1.884252  | 4.137856  |
| 6  | 4.086648  | -3.844181 | -0.052257 | 6  | 0.168336  | 3.060649  | 2.065887  |
| 1  | 1.939278  | -3.786771 | 0.138330  | 6  | 0.819090  | 3.101525  | 4.775375  |
| 6  | 5.214491  | -3.381410 | -0.747778 | 1  | 0.679561  | 0.958721  | 4.695823  |
| 1  | 5.883228  | -2.134007 | -2.368051 | 6  | 0.413539  | 4.276738  | 2.702443  |
| 1  | 4.219970  | -4.517191 | 0.791176  | 1  | -0.053645 | 3.046700  | 1.006753  |
| 6  | 6.598093  | -3.826386 | -0.342402 | 6  | 0.730283  | 4.299330  | 4.060490  |
| 1  | 7.370808  | -3.241445 | -0.848778 | 1  | 1.077868  | 3.115112  | 5.829891  |
| 1  | 6.765437  | -4.881317 | -0.590408 | 1  | 0.359964  | 5.195773  | 2.126883  |
| 1  | 6.749771  | -3.724811 | 0.738149  | 1  | 0.917201  | 5.244351  | 4.561668  |
| 6  | -4.421307 | -2.933470 | 1.821152  | 6  | -0.745619 | -0.932317 | 2.927074  |
| 6  | -3.952865 | -1.628281 | 1.703653  | 6  | -0.646870 | -2.279515 | 2.537671  |
| 6  | -3.000106 | -1.285114 | 0.725762  | 6  | -1.527144 | -0.581320 | 4.032446  |
| 6  | -2.521189 | -2.303314 | -0.114261 | 6  | -1.290086 | -3.262879 | 3.281951  |
| 6  | -3.001471 | -3.606177 | -0.007177 | 1  | -0.096736 | -2.536674 | 1.637852  |
| 6  | -3.953922 | -3.929436 | 0.959702  | 6  | -2.169315 | -1.575165 | 4.773234  |
| 1  | -5.142988 | -3.177407 | 2.596122  | 1  | -1.640666 | 0.459638  | 4.312736  |
| 1  | -4.295556 | -0.869432 | 2.399099  | 6  | -2.044848 | -2.913666 | 4.404181  |
| 1  | -1.745629 | -2.082800 | -0.830381 | 1  | -1.227576 | -4.298903 | 2.966675  |
| 1  | -2.612447 | -4.365347 | -0.679150 | 1  | -2.771542 | -1.299202 | 5.633601  |
| 1  | -4.320313 | -4.948139 | 1.052590  | 1  | -2.552264 | -3.683849 | 4.977122  |
| 6  | -2.545443 | 0.115223  | 0.557684  | 6  | 2.166175  | 0.886371  | -0.451845 |
| 6  | -3.453182 | 1.105182  | 0.729072  | 8  | 3.142431  | 1.286021  | -1.285777 |
| 6  | -3.183970 | 2.559284  | 0.507388  | 6  | 1.034347  | 2.054177  | -2.003215 |
| 1  | -3.787863 | 3.178269  | 1.180269  | 6  | 2.526647  | 1.968584  | -2.412197 |
| 1  | -2.131738 | 2.785378  | 0.688006  | 7  | 0.964669  | 1.238471  | -0.762664 |
| 8  | -3.483907 | 3.049880  | -0.840100 | 6  | 3.073423  | 3.402439  | -2.513443 |
| 6  | -3.896184 | 2.098448  | -1.782059 | 1  | 4.025270  | 3.489572  | -1.980259 |
| 1  | -4.064979 | 2.647723  | -2.718148 | 1  | 3.265867  | 3.665169  | -3.560680 |
| 1  | -4.848010 | 1.627813  | -1.510461 | 6  | 1.971594  | 4.263105  | -1.936098 |
| 6  | -2.856433 | 1.025035  | -2.070205 | 6  | 1.999246  | 5.629477  | -1.660657 |
| 8  | -1.667761 | 1.278404  | -1.789666 | 6  | 0.800489  | 3.524796  | -1.730222 |
| 6  | -3.218086 | -0.239442 | -2.715146 | 6  | 0.840423  | 6.249922  | -1.186879 |



|    |           |           |           |    |           |           |           |
|----|-----------|-----------|-----------|----|-----------|-----------|-----------|
| 8  | 0.144337  | -1.093140 | -2.873014 | 6  | 2.718681  | -3.512198 | 1.931659  |
| 16 | -0.653625 | -1.890463 | -1.906061 | 6  | 1.881110  | -2.440346 | 2.239751  |
| 8  | -2.006733 | -2.274526 | -2.362560 | 1  | 3.757130  | -2.500059 | -1.133550 |
| 8  | -0.676082 | -1.298574 | -0.512563 | 1  | 4.037429  | -4.371691 | 0.459026  |
| 6  | 0.281167  | -3.411808 | -1.671329 | 1  | 2.823944  | -4.332507 | 2.634910  |
| 6  | 1.270975  | -3.765316 | -2.583900 | 1  | 1.335350  | -2.438260 | 3.176221  |
| 6  | 0.008399  | -4.234518 | -0.576607 | 15 | 0.649738  | 0.035955  | 1.783681  |
| 6  | 1.994817  | -4.943933 | -2.394984 | 6  | 1.819395  | 1.145035  | 2.645884  |
| 1  | 1.471685  | -3.105214 | -3.419923 | 6  | 2.421925  | 0.812587  | 3.868779  |
| 6  | 0.737167  | -5.404320 | -0.396542 | 6  | 2.206646  | 2.319606  | 1.985442  |
| 1  | -0.762767 | -3.948837 | 0.129916  | 6  | 3.369979  | 1.663257  | 4.433814  |
| 6  | 1.744073  | -5.776640 | -1.300230 | 1  | 2.155782  | -0.110016 | 4.374287  |
| 1  | 2.770330  | -5.217239 | -3.106201 | 6  | 3.166668  | 3.161859  | 2.546077  |
| 1  | 0.531219  | -6.038202 | 0.462640  | 1  | 1.782758  | 2.559262  | 1.018443  |
| 6  | 2.542419  | -7.037116 | -1.076108 | 6  | 3.742201  | 2.838901  | 3.774857  |
| 1  | 3.243702  | -7.217186 | -1.895250 | 1  | 3.827315  | 1.404259  | 5.383944  |
| 1  | 1.890750  | -7.913880 | -0.992780 | 1  | 3.463430  | 4.057649  | 2.009277  |
| 1  | 3.121728  | -6.980820 | -0.146216 | 1  | 4.487791  | 3.493340  | 4.216284  |
| 6  | -4.786984 | -0.258649 | 2.534652  | 6  | -0.522832 | -0.637693 | 3.000048  |
| 6  | -3.831671 | 0.653921  | 2.094635  | 6  | -1.328115 | -1.709414 | 2.575125  |
| 6  | -3.183187 | 0.480374  | 0.859738  | 6  | -0.713349 | -0.082910 | 4.271388  |
| 6  | -3.517953 | -0.632594 | 0.070445  | 6  | -2.276663 | -2.244330 | 3.439997  |
| 6  | -4.462418 | -1.549383 | 0.521142  | 1  | -1.222833 | -2.082129 | 1.561628  |
| 6  | -5.104451 | -1.366220 | 1.747852  | 6  | -1.678195 | -0.619284 | 5.126986  |
| 1  | -5.280718 | -0.102847 | 3.489091  | 1  | -0.111300 | 0.758264  | 4.597226  |
| 1  | -3.604308 | 1.524297  | 2.701932  | 6  | -2.450188 | -1.705094 | 4.717199  |
| 1  | -3.029300 | -0.805874 | -0.875258 | 1  | -2.903752 | -3.062410 | 3.103335  |
| 1  | -4.693557 | -2.407853 | -0.101535 | 1  | -1.820451 | -0.188300 | 6.113424  |
| 1  | -5.850670 | -2.079373 | 2.086993  | 1  | -3.198951 | -2.121008 | 5.384491  |
| 6  | -2.241446 | 1.529420  | 0.412554  | 6  | 2.282776  | -0.333518 | -0.888975 |
| 6  | -1.416877 | 2.204016  | 1.302770  | 8  | 3.143604  | -0.429786 | -1.914009 |
| 6  | -1.070905 | 3.666263  | 1.159352  | 6  | 1.717625  | 1.435630  | -2.161873 |
| 1  | -1.744011 | 4.191876  | 1.865871  | 6  | 2.824766  | 0.618724  | -2.875116 |
| 1  | -0.047128 | 3.874614  | 1.481848  | 7  | 1.461898  | 0.661903  | -0.921630 |
| 8  | -1.210367 | 4.203487  | -0.132721 | 6  | 4.043049  | 1.541071  | -3.067359 |
| 6  | -2.316020 | 3.688388  | -0.865741 | 1  | 4.955914  | 1.048644  | -2.717362 |
| 1  | -2.251413 | 4.140331  | -1.857309 | 1  | 4.187327  | 1.766912  | -4.130644 |
| 1  | -3.264760 | 3.989507  | -0.395623 | 6  | 3.692263  | 2.792552  | -2.291963 |
| 6  | -2.230247 | 2.152064  | -1.006615 | 6  | 4.491636  | 3.904569  | -2.030465 |
| 8  | -0.946133 | 1.813733  | -1.452944 | 6  | 2.362676  | 2.766499  | -1.858980 |
| 6  | -3.321788 | 1.645159  | -1.929572 | 6  | 3.940427  | 4.988142  | -1.340843 |
| 6  | -4.670784 | 1.927700  | -1.679880 | 1  | 5.526766  | 3.933447  | -2.359953 |
| 6  | -2.977499 | 0.851183  | -3.026002 | 6  | 1.792832  | 3.858184  | -1.206755 |
| 6  | -5.662953 | 1.423628  | -2.518396 | 6  | 2.598389  | 4.969902  | -0.943121 |
| 1  | -4.954311 | 2.512158  | -0.809101 | 1  | 4.554533  | 5.858898  | -1.129347 |
| 6  | -3.972843 | 0.338631  | -3.857960 | 1  | 0.743799  | 3.844295  | -0.928905 |
| 1  | -1.935940 | 0.603408  | -3.187761 | 1  | 2.173302  | 5.831753  | -0.436448 |
| 6  | -5.315021 | 0.625721  | -3.610777 | 1  | 2.486643  | 0.113851  | -3.778718 |
| 1  | -6.706876 | 1.641117  | -2.311051 | 1  | 0.778805  | 1.498920  | -2.708261 |
| 1  | -3.693417 | -0.305629 | -4.685455 |    |           |           |           |
| 1  | -6.088944 | 0.220746  | -4.256553 |    |           |           |           |
| 1  | -1.394059 | 1.854651  | 2.332700  |    |           |           |           |
| 6  | 1.711854  | -1.383935 | 1.342401  |    |           |           |           |
| 6  | 2.409046  | -1.399290 | 0.118359  |    |           |           |           |
| 6  | 3.248090  | -2.481488 | -0.179991 | 28 | -0.098306 | -0.525439 | -1.190861 |
| 6  | 3.400363  | -3.533236 | 0.718136  | 8  | 0.205924  | -3.969266 | -0.095686 |

**(S)-IM8D**

SCF Energy = -2693.441427

Gibbs Free Energy = -2692.935385

|    |           |           |           |    |           |           |           |
|----|-----------|-----------|-----------|----|-----------|-----------|-----------|
| 16 | -0.649667 | -3.519378 | -1.217492 | 1  | 4.368543  | -1.576158 | 2.574951  |
| 8  | -1.144721 | -4.533457 | -2.154191 | 1  | 4.829875  | -2.815776 | 1.410068  |
| 8  | 0.028203  | -2.361191 | -2.001728 | 6  | 4.442907  | -0.892776 | 0.487162  |
| 6  | -2.067199 | -2.702044 | -0.470912 | 6  | 5.545796  | -0.055829 | 0.325410  |
| 6  | -2.064420 | -2.421733 | 0.892484  | 6  | 3.390640  | -0.849970 | -0.432722 |
| 6  | -3.109977 | -2.252579 | -1.284645 | 6  | 5.575329  | 0.819931  | -0.762577 |
| 6  | -3.075181 | -1.627591 | 1.433914  | 1  | 6.369825  | -0.080533 | 1.033232  |
| 1  | -1.261724 | -2.812422 | 1.505993  | 6  | 3.414161  | 0.020205  | -1.519966 |
| 6  | -4.115598 | -1.467926 | -0.731022 | 6  | 4.519006  | 0.857295  | -1.679152 |
| 1  | -3.111909 | -2.499548 | -2.340142 | 1  | 6.426409  | 1.481065  | -0.896888 |
| 6  | -4.096682 | -1.116057 | 0.628184  | 1  | 2.582551  | 0.054034  | -2.217774 |
| 1  | -3.055730 | -1.384132 | 2.492076  | 1  | 4.552117  | 1.551342  | -2.512327 |
| 1  | -4.919609 | -1.102589 | -1.364972 | 1  | 2.483981  | -3.372217 | 1.531084  |
| 6  | -5.129966 | -0.172601 | 1.189449  | 1  | 2.062139  | -2.581851 | -0.753714 |
| 1  | -4.928914 | 0.854057  | 0.858765  | 8  | -1.035588 | 0.043582  | -2.617159 |
| 1  | -5.124370 | -0.177898 | 2.282766  | 1  | -1.010903 | -0.739651 | -3.188679 |
| 1  | -6.138735 | -0.430386 | 0.851065  |    |           |           |           |
| 6  | -0.762606 | 0.924571  | 1.619060  |    |           |           |           |
| 6  | -0.057098 | -0.121962 | 2.256261  |    |           |           |           |
| 6  | -0.315644 | -0.432563 | 3.596491  |    |           |           |           |
| 6  | -1.293506 | 0.262983  | 4.304291  |    |           |           |           |
| 6  | -2.007048 | 1.281802  | 3.675717  | 8  | -0.150082 | 2.169217  | -0.956680 |
| 6  | -1.737081 | 1.612388  | 2.346154  | 14 | 0.226778  | 0.830804  | -0.058860 |
| 1  | 0.245533  | -1.232063 | 4.065708  | 8  | 1.621115  | 0.184549  | -0.659263 |
| 1  | -1.498072 | 0.005617  | 5.338385  | 8  | -0.901256 | -0.377197 | -0.214374 |
| 1  | -2.775461 | 1.825008  | 4.216818  | 6  | 1.914159  | -1.211947 | -0.727974 |
| 1  | -2.297259 | 2.407336  | 1.869250  | 1  | 1.093546  | -1.739184 | -1.227864 |
| 15 | -0.438167 | 1.331372  | -0.148587 | 1  | 2.808851  | -1.308750 | -1.351901 |
| 6  | 1.054450  | 2.382495  | -0.148721 | 6  | 2.162148  | -1.814899 | 0.647887  |
| 6  | 1.948309  | 2.428087  | 0.926764  | 1  | 1.250051  | -1.785571 | 1.251943  |
| 6  | 1.359112  | 3.067187  | -1.336072 | 1  | 2.472588  | -2.861243 | 0.556829  |
| 6  | 3.132813  | 3.156500  | 0.818806  | 1  | 2.948025  | -1.264163 | 1.173107  |
| 1  | 1.724954  | 1.899579  | 1.846844  | 6  | -2.256819 | -0.237081 | 0.207502  |
| 6  | 2.534527  | 3.807495  | -1.430445 | 1  | -2.294951 | -0.029524 | 1.286515  |
| 1  | 0.677491  | 3.012468  | -2.179592 | 1  | -2.722949 | 0.613712  | -0.307743 |
| 6  | 3.424807  | 3.849827  | -0.354931 | 6  | -3.004545 | -1.520895 | -0.105732 |
| 1  | 3.827856  | 3.177693  | 1.652061  | 1  | -2.978157 | -1.724236 | -1.180063 |
| 1  | 2.761600  | 4.341058  | -2.348332 | 1  | -2.543846 | -2.366173 | 0.413679  |
| 1  | 4.347909  | 4.415299  | -0.435781 | 1  | -4.050089 | -1.445271 | 0.209751  |
| 6  | -1.815157 | 2.414121  | -0.624532 | 6  | 0.367703  | 1.414538  | 1.701635  |
| 6  | -2.936952 | 1.840011  | -1.239079 | 1  | -0.553058 | 1.903054  | 2.035248  |
| 6  | -1.806328 | 3.781734  | -0.310472 | 1  | 0.573452  | 0.577425  | 2.375220  |
| 6  | -4.051239 | 2.633241  | -1.512859 | 1  | 1.182123  | 2.138017  | 1.797961  |
| 1  | -2.902592 | 0.796539  | -1.525414 | 1  | -0.014574 | 2.069803  | -1.906022 |
| 6  | -2.922862 | 4.566889  | -0.593386 |    |           |           |           |
| 1  | -0.931277 | 4.227596  | 0.151437  |    |           |           |           |
| 6  | -4.047900 | 3.991131  | -1.188751 |    |           |           |           |
| 1  | -4.918433 | 2.190032  | -1.992778 |    |           |           |           |
| 1  | -2.914513 | 5.625053  | -0.350536 |    |           |           |           |
| 1  | -4.916922 | 4.604257  | -1.408286 | 28 | 0.142558  | -0.663244 | 0.306787  |
| 6  | 0.949946  | -0.912011 | 1.537463  | 6  | -2.725316 | -0.299655 | 0.151485  |
| 8  | 1.874271  | -1.542912 | 2.276991  | 6  | -1.628175 | -0.615337 | -0.591180 |
| 6  | 2.285972  | -1.799613 | -0.031624 | 6  | -1.486618 | -0.494923 | -2.084180 |
| 6  | 2.720183  | -2.322948 | 1.357413  | 1  | -2.455923 | -0.580456 | -2.601057 |
| 7  | 1.039488  | -1.055577 | 0.260484  | 1  | -1.005867 | 0.434934  | -2.402018 |
| 6  | 4.191862  | -1.935703 | 1.556558  | 8  | -0.632100 | -1.569560 | -2.492926 |

**[Si]OH/(EtO)<sub>2</sub>MeSiOH**

SCF Energy = -714.326782

Gibbs Free Energy = -714.173432

**(S)-TS1A**

SCF Energy = -2529.916978

Gibbs Free Energy = -2529.287398

|    |           |           |           |    |           |           |           |
|----|-----------|-----------|-----------|----|-----------|-----------|-----------|
| 6  | -1.142166 | -2.739040 | -1.875708 | 1  | 5.726668  | -2.905090 | 1.321647  |
| 1  | -0.437163 | -3.553250 | -2.061187 | 6  | 4.690421  | -2.036528 | -0.368689 |
| 1  | -2.116516 | -3.002134 | -2.303548 | 6  | 5.464255  | -2.035928 | -1.528549 |
| 6  | -1.242710 | -2.543169 | -0.349045 | 6  | 3.298499  | -2.138955 | -0.452119 |
| 8  | -0.092239 | -2.500901 | 0.289323  | 6  | 4.828596  | -2.152302 | -2.766586 |
| 6  | -2.375090 | -3.205875 | 0.374495  | 1  | 6.545895  | -1.956714 | -1.472467 |
| 6  | -3.659867 | -3.318329 | -0.181642 | 6  | 2.660761  | -2.271616 | -1.683671 |
| 6  | -2.146046 | -3.694719 | 1.666647  | 6  | 3.437114  | -2.277305 | -2.843508 |
| 6  | -4.688566 | -3.914892 | 0.540051  | 1  | 5.421491  | -2.157939 | -3.675974 |
| 1  | -3.871723 | -2.910387 | -1.164029 | 1  | 1.582927  | -2.347603 | -1.738816 |
| 6  | -3.177750 | -4.296595 | 2.386903  | 1  | 2.955767  | -2.381325 | -3.811184 |
| 1  | -1.152604 | -3.598842 | 2.088307  | 1  | 3.856619  | -2.595477 | 2.751874  |
| 6  | -4.450151 | -4.408099 | 1.826776  | 1  | 2.028950  | -2.946558 | 1.131147  |
| 1  | -5.678108 | -3.993504 | 0.101254  | 1  | -2.720515 | -0.653225 | 1.182969  |
| 1  | -2.986913 | -4.678985 | 3.384717  | 6  | -3.963918 | 0.337455  | -0.250808 |
| 1  | -5.253960 | -4.875338 | 2.386849  | 6  | -5.109249 | 0.108443  | 0.540515  |
| 6  | 1.248005  | 2.082762  | 1.747732  | 6  | -4.079805 | 1.159904  | -1.389407 |
| 6  | 2.180153  | 1.263900  | 2.424519  | 6  | -6.337431 | 0.653303  | 0.185025  |
| 6  | 2.823349  | 1.743627  | 3.573913  | 1  | -5.024217 | -0.521235 | 1.421361  |
| 6  | 2.541940  | 3.016673  | 4.063893  | 6  | -5.307256 | 1.712074  | -1.735024 |
| 6  | 1.624543  | 3.826787  | 3.398858  | 1  | -3.198239 | 1.418874  | -1.961216 |
| 6  | 0.987366  | 3.362540  | 2.246045  | 6  | -6.439171 | 1.454447  | -0.956084 |
| 1  | 3.541723  | 1.109041  | 4.078011  | 1  | -7.214141 | 0.459802  | 0.794483  |
| 1  | 3.040885  | 3.372233  | 4.958991  | 1  | -5.382152 | 2.355985  | -2.605289 |
| 1  | 1.403824  | 4.822491  | 3.769679  | 1  | -7.396030 | 1.886904  | -1.230932 |
| 1  | 0.280356  | 4.003346  | 1.733067  |    |           |           |           |
| 15 | 0.475061  | 1.494260  | 0.192109  |    |           |           |           |
| 6  | 1.708856  | 1.889026  | -1.089597 |    |           |           |           |
| 6  | 2.445919  | 3.082902  | -1.044812 |    |           |           |           |
| 6  | 1.923904  | 0.973624  | -2.128625 |    |           |           |           |
| 6  | 3.383204  | 3.357058  | -2.037370 | 28 | 0.037624  | -0.022749 | -0.390993 |
| 1  | 2.293106  | 3.788864  | -0.234971 | 6  | -0.163594 | -3.138661 | 0.196936  |
| 6  | 2.868800  | 1.252069  | -3.116057 | 6  | -0.044566 | -2.772357 | -2.158517 |
| 1  | 1.372586  | 0.040967  | -2.160106 | 6  | -1.166620 | -1.777130 | -1.811394 |
| 6  | 3.595647  | 2.441308  | -3.072329 | 6  | -0.759935 | -1.789538 | 0.002931  |
| 1  | 3.953007  | 4.280041  | -2.000986 | 1  | 0.701160  | -3.095901 | 0.869188  |
| 1  | 3.045080  | 0.529330  | -3.905006 | 1  | -0.895603 | -3.838272 | 0.624769  |
| 1  | 4.333592  | 2.654681  | -3.839172 | 6  | -1.323209 | -0.828524 | 0.714447  |
| 6  | -0.926908 | 2.625771  | -0.074878 | 6  | -2.112372 | -0.686498 | 1.901301  |
| 6  | -1.045741 | 3.375712  | -1.251847 | 6  | -3.046767 | -1.682642 | 2.262765  |
| 6  | -1.923233 | 2.720612  | 0.910907  | 6  | -2.033316 | 0.483956  | 2.684764  |
| 6  | -2.144963 | 4.218299  | -1.433824 | 6  | -3.861841 | -1.512093 | 3.376264  |
| 1  | -0.277457 | 3.314085  | -2.014855 | 1  | -3.132799 | -2.569151 | 1.641746  |
| 6  | -3.010091 | 3.570031  | 0.729039  | 6  | -2.822527 | 0.629909  | 3.820269  |
| 1  | -1.841294 | 2.137262  | 1.823115  | 1  | -1.353651 | 1.269315  | 2.369526  |
| 6  | -3.122884 | 4.319373  | -0.444776 | 6  | -3.743754 | -0.363570 | 4.166666  |
| 1  | -2.229338 | 4.800181  | -2.346112 | 1  | -4.585704 | -2.278455 | 3.638135  |
| 1  | -3.776309 | 3.636745  | 1.494265  | 1  | -2.742004 | 1.529879  | 4.422922  |
| 1  | -3.974507 | 4.976414  | -0.587662 | 1  | -4.374643 | -0.239049 | 5.041773  |
| 6  | 2.534139  | -0.083972 | 1.952761  | 8  | 0.262949  | -3.656616 | -1.076041 |
| 8  | 3.686248  | -0.573524 | 2.426850  | 1  | 0.829110  | -2.172189 | -2.435133 |
| 6  | 2.667928  | -2.089025 | 0.921418  | 1  | -0.334163 | -3.399744 | -3.008781 |
| 6  | 3.869791  | -1.922808 | 1.893352  | 8  | -1.023520 | -0.556722 | -2.232571 |
| 7  | 1.871130  | -0.851599 | 1.148682  | 6  | -2.571478 | -2.345155 | -1.812219 |
| 6  | 5.164537  | -1.999805 | 1.066549  | 6  | -2.835522 | -3.707154 | -1.606328 |
| 1  | 5.812076  | -1.147051 | 1.293048  | 6  | -3.645756 | -1.462216 | -1.973539 |

(S)-TS1C

SCF Energy = -2529.416395

Gibbs Free Energy = -2528.804439

|    |           |           |           |    |           |           |           |
|----|-----------|-----------|-----------|----|-----------|-----------|-----------|
| 6  | -4.150877 | -4.169178 | -1.548864 | 1  | -5.233911 | 4.137781  | 1.106149  |
| 1  | -2.010901 | -4.402726 | -1.484414 | 1  | -2.910099 | 0.782828  | -0.273915 |
| 6  | -4.958375 | -1.924249 | -1.915657 | 1  | -4.837420 | 1.688643  | 1.018958  |
| 1  | -3.420235 | -0.416941 | -2.148597 | 1  | -0.141750 | 3.841238  | -3.160459 |
| 6  | -5.217093 | -3.279941 | -1.697507 | 1  | -1.182842 | 1.687120  | -2.489911 |
| 1  | -4.343148 | -5.226629 | -1.389074 |    |           |           |           |
| 1  | -5.782341 | -1.227139 | -2.042042 |    |           |           |           |
| 1  | -6.240349 | -3.641062 | -1.648420 |    |           |           |           |
| 6  | 2.826909  | 1.476732  | 0.544693  |    |           |           |           |
| 6  | 2.224097  | 2.683096  | 0.118567  |    |           |           |           |
| 6  | 2.818863  | 3.911163  | 0.460754  | 28 | -0.143968 | 0.097546  | -1.070659 |
| 6  | 3.976638  | 3.955794  | 1.228116  | 6  | -2.132937 | -1.102281 | 1.207958  |
| 6  | 4.569031  | 2.768373  | 1.659295  | 6  | -1.093625 | -0.865705 | 2.137524  |
| 6  | 3.997165  | 1.547111  | 1.312590  | 6  | -1.092558 | -1.529364 | 3.368512  |
| 1  | 2.352448  | 4.827650  | 0.121600  | 6  | -2.095903 | -2.448036 | 3.670156  |
| 1  | 4.412640  | 4.914484  | 1.490585  | 6  | -3.115418 | -2.692995 | 2.753149  |
| 1  | 5.471895  | 2.791720  | 2.261760  | 6  | -3.136472 | -2.018394 | 1.529425  |
| 1  | 4.460593  | 0.625261  | 1.647157  | 1  | -0.287277 | -1.342890 | 4.066644  |
| 15 | 2.152356  | -0.179318 | 0.091760  | 1  | -2.075172 | -2.972939 | 4.619006  |
| 6  | 2.441324  | -1.130421 | 1.639840  | 1  | -3.899599 | -3.406163 | 2.985224  |
| 6  | 3.522918  | -1.999862 | 1.830465  | 1  | -3.936751 | -2.207259 | 0.823002  |
| 6  | 1.503936  | -0.968447 | 2.672101  | 15 | -2.164843 | -0.217194 | -0.388769 |
| 6  | 3.657008  | -2.702084 | 3.030058  | 6  | -2.896459 | 1.420306  | -0.112080 |
| 1  | 4.251570  | -2.139649 | 1.039753  | 6  | -3.055347 | 1.951489  | 1.173232  |
| 6  | 1.642494  | -1.666298 | 3.868721  | 6  | -3.169268 | 2.210955  | -1.241122 |
| 1  | 0.656228  | -0.308839 | 2.525021  | 6  | -3.491810 | 3.266965  | 1.327904  |
| 6  | 2.718717  | -2.539023 | 4.049384  | 1  | -2.843920 | 1.345614  | 2.047697  |
| 1  | 4.495361  | -3.379302 | 3.164318  | 6  | -3.622586 | 3.516435  | -1.075592 |
| 1  | 0.903062  | -1.536443 | 4.653229  | 1  | -3.021444 | 1.806151  | -2.237830 |
| 1  | 2.822381  | -3.091693 | 4.978322  | 6  | -3.778007 | 4.046837  | 0.207451  |
| 6  | 3.407810  | -0.848645 | -1.066678 | 1  | -3.610946 | 3.679844  | 2.324178  |
| 6  | 3.288338  | -2.195409 | -1.456043 | 1  | -3.842436 | 4.123901  | -1.947558 |
| 6  | 4.403645  | -0.054677 | -1.650460 | 1  | -4.119168 | 5.069285  | 0.332807  |
| 6  | 4.166533  | -2.734117 | -2.393127 | 6  | -3.268674 | -1.162109 | -1.469727 |
| 1  | 2.506810  | -2.822924 | -1.035981 | 6  | -2.753960 | -2.281350 | -2.142242 |
| 6  | 5.273082  | -0.598084 | -2.597901 | 6  | -4.621282 | -0.823455 | -1.612162 |
| 1  | 4.504552  | 0.986882  | -1.365740 | 6  | -3.584545 | -3.054445 | -2.948794 |
| 6  | 5.160575  | -1.937814 | -2.968106 | 1  | -1.707022 | -2.547796 | -2.032592 |
| 1  | 4.066764  | -3.776333 | -2.681135 | 6  | -5.447755 | -1.600534 | -2.424181 |
| 1  | 6.040786  | 0.028115  | -3.043037 | 1  | -5.022903 | 0.043007  | -1.098321 |
| 1  | 5.838753  | -2.359136 | -3.704014 | 6  | -4.931778 | -2.712288 | -3.091675 |
| 6  | 0.989632  | 2.742956  | -0.680811 | 1  | -3.181916 | -3.916676 | -3.470225 |
| 8  | 0.777039  | 3.916084  | -1.324829 | 1  | -6.493882 | -1.334962 | -2.536189 |
| 6  | -0.998190 | 2.395333  | -1.681047 | 1  | -5.577468 | -3.310926 | -3.725942 |
| 6  | -0.441028 | 3.781490  | -2.112195 | 6  | -0.016463 | 0.088679  | 1.855003  |
| 7  | 0.087107  | 1.835317  | -0.833423 | 8  | 0.611640  | 0.613251  | 2.910586  |
| 6  | -1.465281 | 4.854635  | -1.704972 | 6  | 1.388974  | 1.574794  | 0.894406  |
| 1  | -0.968820 | 5.676064  | -1.178239 | 6  | 1.644956  | 1.535068  | 2.424936  |
| 1  | -1.940151 | 5.284847  | -2.594966 | 7  | 0.384152  | 0.498043  | 0.694309  |
| 6  | -2.470016 | 4.107846  | -0.857219 | 6  | 1.397671  | 2.947780  | 2.975918  |
| 6  | -3.548782 | 4.625427  | -0.141462 | 1  | 0.790589  | 2.905057  | 3.885221  |
| 6  | -2.242570 | 2.728235  | -0.888041 | 1  | 2.350553  | 3.416156  | 3.248284  |
| 6  | -4.394828 | 3.745596  | 0.538717  | 6  | 0.733020  | 3.680403  | 1.830636  |
| 1  | -3.731678 | 5.696242  | -0.112656 | 6  | 0.153880  | 4.948216  | 1.832187  |
| 6  | -3.100462 | 1.846317  | -0.235979 | 6  | 0.781458  | 2.935194  | 0.649196  |
| 6  | -4.175322 | 2.364993  | 0.487506  | 6  | -0.374237 | 5.450502  | 0.640719  |

(S)-TS3A

SCF Energy = -2606.390753

Gibbs Free Energy = -2605.738430

|    |           |           |           |    |           |           |           |
|----|-----------|-----------|-----------|----|-----------|-----------|-----------|
| 1  | 0.113751  | 5.539082  | 2.742478  | 8  | -1.068053 | -1.121819 | -2.496631 |
| 6  | 0.266175  | 3.434353  | -0.545199 | 6  | -1.733017 | -2.253917 | -1.961341 |
| 6  | -0.316655 | 4.702088  | -0.539972 | 1  | -1.098111 | -3.127869 | -2.122915 |
| 1  | -0.830595 | 6.435334  | 0.629771  | 1  | -2.684837 | -2.399157 | -2.481936 |
| 1  | 0.315706  | 2.849650  | -1.458749 | 6  | -1.943737 | -2.093131 | -0.438676 |
| 1  | -0.730544 | 5.108290  | -1.456803 | 8  | -0.861553 | -2.230068 | 0.300096  |
| 1  | 2.602043  | 1.102396  | 2.718018  | 6  | -3.202383 | -2.629023 | 0.175038  |
| 1  | 2.264171  | 1.365427  | 0.279611  | 6  | -4.362725 | -2.909816 | -0.561241 |
| 8  | -0.471064 | 0.014693  | -2.944774 | 6  | -3.213828 | -2.840837 | 1.562681  |
| 1  | -0.505373 | -0.900025 | -3.268088 | 6  | -5.505868 | -3.387889 | 0.076552  |
| 1  | 0.706972  | 0.241142  | -2.847663 | 1  | -4.395772 | -2.752499 | -1.632566 |
| 6  | 2.487733  | -1.671442 | 0.306573  | 6  | -4.359880 | -3.307699 | 2.200053  |
| 6  | 2.199929  | -1.694094 | -1.003150 | 1  | -2.309386 | -2.639220 | 2.124672  |
| 6  | 1.426149  | -2.714013 | -1.809657 | 6  | -5.511328 | -3.582230 | 1.458403  |
| 1  | 1.909254  | -3.702323 | -1.760354 | 1  | -6.394262 | -3.605316 | -0.507601 |
| 1  | 0.386031  | -2.836068 | -1.485528 | 1  | -4.354215 | -3.465131 | 3.274058  |
| 8  | 1.406582  | -2.228794 | -3.154457 | 1  | -6.404510 | -3.950499 | 1.952874  |
| 6  | 2.556140  | -1.384440 | -3.303824 | 6  | 1.525265  | 1.987063  | 1.594094  |
| 1  | 2.408019  | -0.746107 | -4.176465 | 6  | 2.163025  | 1.002200  | 2.381850  |
| 1  | 3.465728  | -1.984684 | -3.439471 | 6  | 2.883285  | 1.378267  | 3.524639  |
| 6  | 2.620350  | -0.593598 | -1.983989 | 6  | 2.975002  | 2.716752  | 3.896493  |
| 8  | 1.600544  | 0.423717  | -2.013592 | 6  | 2.363078  | 3.692922  | 3.114039  |
| 6  | 3.967629  | 0.041562  | -1.704911 | 6  | 1.649855  | 3.328472  | 1.970146  |
| 6  | 5.091676  | -0.760182 | -1.460886 | 1  | 3.371141  | 0.611520  | 4.113452  |
| 6  | 4.113153  | 1.432604  | -1.704837 | 1  | 3.529108  | 2.993049  | 4.787082  |
| 6  | 6.335347  | -0.181023 | -1.219630 | 1  | 2.440930  | 4.740791  | 3.385234  |
| 1  | 4.990235  | -1.841168 | -1.444583 | 1  | 1.188761  | 4.100196  | 1.366848  |
| 6  | 5.359495  | 2.012404  | -1.457036 | 15 | 0.646780  | 1.505295  | 0.054049  |
| 1  | 3.246655  | 2.051222  | -1.904633 | 6  | 1.972254  | 1.442936  | -1.199968 |
| 6  | 6.472755  | 1.209311  | -1.214191 | 6  | 3.100255  | 2.272676  | -1.106142 |
| 1  | 7.196742  | -0.814461 | -1.032104 | 6  | 1.835760  | 0.570456  | -2.288572 |
| 1  | 5.458319  | 3.093695  | -1.460862 | 6  | 4.079369  | 2.228714  | -2.095571 |
| 1  | 7.441649  | 1.660126  | -1.024106 | 1  | 3.216178  | 2.945035  | -0.263038 |
| 1  | 3.140024  | -0.862940 | 0.630397  | 6  | 2.818140  | 0.537858  | -3.278341 |
| 6  | 2.031250  | -2.539963 | 1.391287  | 1  | 0.978266  | -0.089214 | -2.359899 |
| 6  | 2.497669  | -2.261073 | 2.691081  | 6  | 3.938276  | 1.362702  | -3.183116 |
| 6  | 1.134158  | -3.615108 | 1.233259  | 1  | 4.952665  | 2.868399  | -2.017683 |
| 6  | 2.095815  | -3.021211 | 3.785389  | 1  | 2.712053  | -0.144838 | -4.114576 |
| 1  | 3.197416  | -1.441922 | 2.832799  | 1  | 4.704530  | 1.329018  | -3.951085 |
| 6  | 0.728825  | -4.373089 | 2.328276  | 6  | -0.344366 | 2.977813  | -0.369397 |
| 1  | 0.750639  | -3.872813 | 0.255518  | 6  | -0.268370 | 3.552338  | -1.645242 |
| 6  | 1.206700  | -4.083167 | 3.607902  | 6  | -1.190939 | 3.547735  | 0.594632  |
| 1  | 2.481045  | -2.790636 | 4.773830  | 6  | -1.023508 | 4.687156  | -1.947796 |
| 1  | 0.038552  | -5.197788 | 2.181135  | 1  | 0.391004  | 3.126526  | -2.393700 |
| 1  | 0.894378  | -4.682977 | 4.456824  | 6  | -1.921188 | 4.695907  | 0.296143  |
|    |           |           |           | 1  | -1.256942 | 3.109473  | 1.585545  |
|    |           |           |           | 6  | -1.840591 | 5.266192  | -0.976796 |
|    |           |           |           | 1  | -0.958742 | 5.125841  | -2.938223 |
|    |           |           |           | 1  | -2.558802 | 5.141116  | 1.053086  |
|    |           |           |           | 1  | -2.413810 | 6.157717  | -1.209251 |
| 28 | -0.256941 | -0.490945 | 0.286441  | 6  | 2.150742  | -0.422844 | 2.022165  |
| 6  | -3.003361 | 0.362997  | 0.191474  | 8  | 3.103372  | -1.165601 | 2.598994  |
| 6  | -2.036894 | -0.125991 | -0.618513 | 6  | 1.816433  | -2.451504 | 1.098104  |
| 6  | -1.839908 | 0.021901  | -2.101758 | 6  | 2.917495  | -2.557288 | 2.185937  |
| 1  | -2.783185 | 0.027015  | -2.665482 | 7  | 1.347816  | -1.042654 | 1.217309  |
| 1  | -1.267632 | 0.911920  | -2.373430 | 6  | 4.193805  | -3.090271 | 1.518226  |

**(S)-TS3B**

SCF Energy = -2456.1104

Gibbs Free Energy = -2455.447734



|    |           |           |           |    |           |           |           |
|----|-----------|-----------|-----------|----|-----------|-----------|-----------|
| 1  | 5.061705  | -2.493863 | 1.815695  | 6  | -3.063598 | -3.349073 | -0.160220 |
| 1  | 4.386195  | -4.119736 | 1.841445  | 6  | -4.267707 | -3.573133 | 0.505583  |
| 6  | 3.889970  | -3.028441 | 0.038280  | 1  | -5.900381 | -2.646281 | 1.570597  |
| 6  | 4.748785  | -3.288027 | -1.028565 | 1  | -5.019042 | -0.372777 | 1.342680  |
| 6  | 2.548426  | -2.712796 | -0.199189 | 1  | -1.591501 | -1.919246 | -0.737901 |
| 6  | 4.245687  | -3.235552 | -2.330363 | 1  | -2.513666 | -4.164344 | -0.619958 |
| 1  | 5.791834  | -3.534017 | -0.852857 | 1  | -4.681098 | -4.575321 | 0.577383  |
| 6  | 2.040398  | -2.667473 | -1.495006 | 6  | -2.686847 | 0.415015  | 0.132555  |
| 6  | 2.899945  | -2.932430 | -2.561816 | 6  | -3.184167 | 1.440282  | 0.867132  |
| 1  | 4.904223  | -3.438495 | -3.169101 | 6  | -3.072651 | 2.898479  | 0.553815  |
| 1  | 1.003386  | -2.412126 | -1.668374 | 1  | -4.064591 | 3.349049  | 0.737527  |
| 1  | 2.520705  | -2.903316 | -3.578637 | 1  | -2.365545 | 3.407234  | 1.219154  |
| 1  | 2.624698  | -3.106807 | 3.082063  | 8  | -2.655942 | 3.193143  | -0.766480 |
| 1  | 0.964621  | -3.112151 | 1.251739  | 6  | -3.247728 | 2.349269  | -1.741027 |
| 1  | -3.008105 | -0.042112 | 1.206128  | 1  | -3.123319 | 2.863188  | -2.700159 |
| 6  | -4.183642 | 1.273465  | -0.073894 | 1  | -4.317237 | 2.208863  | -1.549329 |
| 6  | -4.011739 | 2.190173  | -1.295339 | 6  | -2.495677 | 1.024178  | -1.855005 |
| 1  | -4.052793 | 1.630140  | -2.232006 | 8  | -1.206430 | 1.180189  | -2.008902 |
| 1  | -4.825043 | 2.921283  | -1.323015 | 6  | -3.124844 | -0.119144 | -2.568709 |
| 1  | -3.070355 | 2.738487  | -1.260235 | 6  | -4.502727 | -0.375575 | -2.517035 |
| 6  | -5.397577 | 0.334104  | -0.294982 | 6  | -2.277780 | -1.019211 | -3.232075 |
| 1  | -5.548690 | -0.342877 | 0.550063  | 6  | -5.022647 | -1.516856 | -3.119041 |
| 1  | -6.300710 | 0.941139  | -0.415865 | 1  | -5.164789 | 0.285857  | -1.968271 |
| 1  | -5.270758 | -0.273501 | -1.194265 | 6  | -2.799788 | -2.165595 | -3.823011 |
| 6  | -4.450322 | 2.113262  | 1.192383  | 1  | -1.210589 | -0.832111 | -3.243561 |
| 1  | -3.623476 | 2.793523  | 1.401774  | 6  | -4.171522 | -2.416280 | -3.767664 |
| 1  | -5.354946 | 2.713242  | 1.057127  | 1  | -6.088088 | -1.718245 | -3.063372 |
| 1  | -4.599586 | 1.471441  | 2.066679  | 1  | -2.122172 | -2.873130 | -4.288102 |
|    |           |           |           | 1  | -4.579000 | -3.317723 | -4.216033 |
|    |           |           |           | 1  | -3.828084 | 1.229332  | 1.722708  |
|    |           |           |           | 6  | 1.608882  | -0.320466 | 1.929215  |
|    |           |           |           | 6  | 2.575443  | -0.113970 | 0.924407  |
|    |           |           |           | 6  | 3.853879  | -0.668157 | 1.075642  |
|    |           |           |           | 6  | 4.175398  | -1.421050 | 2.200738  |
|    |           |           |           | 6  | 3.223726  | -1.618075 | 3.197272  |
|    |           |           |           | 6  | 1.949784  | -1.065921 | 3.059604  |
|    |           |           |           | 1  | 4.579641  | -0.533900 | 0.286324  |
|    |           |           |           | 1  | 5.162669  | -1.861854 | 2.285642  |
|    |           |           |           | 1  | 3.462262  | -2.208367 | 4.076747  |
|    |           |           |           | 1  | 1.205487  | -1.239237 | 3.828289  |
|    |           |           |           | 15 | -0.058816 | 0.415704  | 1.773620  |
|    |           |           |           | 6  | 0.153750  | 2.020473  | 2.630379  |
|    |           |           |           | 6  | 0.407985  | 2.114408  | 4.006724  |
|    |           |           |           | 6  | 0.168570  | 3.183401  | 1.848495  |
|    |           |           |           | 6  | 0.645185  | 3.357368  | 4.590453  |
|    |           |           |           | 1  | 0.421243  | 1.218785  | 4.619354  |
|    |           |           |           | 6  | 0.421826  | 4.425005  | 2.431944  |
|    |           |           |           | 1  | 0.002828  | 3.114376  | 0.780438  |
|    |           |           |           | 6  | 0.652881  | 4.513768  | 3.804680  |
|    |           |           |           | 1  | 0.833696  | 3.423920  | 5.657760  |
|    |           |           |           | 1  | 0.446451  | 5.310733  | 1.804582  |
|    |           |           |           | 1  | 0.847297  | 5.478570  | 4.263472  |
|    |           |           |           | 6  | -1.120824 | -0.626951 | 2.816988  |
|    |           |           |           | 6  | -1.144796 | -2.003919 | 2.542483  |
|    |           |           |           | 6  | -2.012578 | -0.088173 | 3.751780  |
|    |           |           |           | 6  | -2.038264 | -2.830100 | 3.218489  |
| 28 | -0.655635 | 0.711848  | -0.307037 | 6  |           |           |           |
| 8  | 1.357347  | -1.173947 | -2.701674 | 6  |           |           |           |
| 16 | 0.959714  | -2.224869 | -1.724259 | 6  |           |           |           |
| 8  | 0.123859  | -3.313601 | -2.277743 | 1  |           |           |           |
| 8  | 0.390322  | -1.656078 | -0.450282 | 1  |           |           |           |
| 6  | 2.503510  | -2.953397 | -1.151352 | 1  |           |           |           |
| 6  | 3.709470  | -2.623618 | -1.761805 | 1  |           |           |           |
| 6  | 2.484836  | -3.812652 | -0.050208 | 15 |           |           |           |
| 6  | 4.902837  | -3.150647 | -1.263043 | 6  |           |           |           |
| 1  | 3.699787  | -1.947448 | -2.608573 | 6  |           |           |           |
| 6  | 3.677840  | -4.331649 | 0.438313  | 6  |           |           |           |
| 1  | 1.539998  | -4.051355 | 0.425647  | 6  |           |           |           |
| 6  | 4.906597  | -4.007248 | -0.157916 | 1  |           |           |           |
| 1  | 5.845373  | -2.887347 | -1.736836 | 6  |           |           |           |
| 1  | 3.663055  | -4.990642 | 1.303075  | 1  |           |           |           |
| 6  | 6.193862  | -4.581195 | 0.381199  | 6  |           |           |           |
| 1  | 7.065542  | -4.069338 | -0.035947 | 1  |           |           |           |
| 1  | 6.287789  | -5.646091 | 0.136541  | 1  |           |           |           |
| 1  | 6.242285  | -4.499009 | 1.472730  | 1  |           |           |           |
| 6  | -4.952301 | -2.490112 | 1.063285  | 6  |           |           |           |
| 6  | -4.440238 | -1.201386 | 0.947618  | 6  |           |           |           |
| 6  | -3.209340 | -0.963157 | 0.306753  | 6  |           |           |           |
| 6  | -2.541635 | -2.062682 | -0.250917 | 6  |           |           |           |

**(S)-TS4D**

SCF Energy = -3424.932772

Gibbs Free Energy = -3424.182807

|    |           |           |           |   |           |           |           |
|----|-----------|-----------|-----------|---|-----------|-----------|-----------|
| 1  | -0.492579 | -2.406387 | 1.774025  | 6 | -1.850897 | -3.576760 | -0.368390 |
| 6  | -2.910319 | -0.921566 | 4.419284  | 6 | -3.956293 | -2.692832 | -1.216269 |
| 1  | -2.012777 | 0.977404  | 3.953191  | 6 | -2.225630 | -4.852444 | -0.783984 |
| 6  | -2.922433 | -2.291259 | 4.154430  | 1 | -0.893198 | -3.417029 | 0.122115  |
| 1  | -2.068436 | -3.888791 | 2.985056  | 6 | -4.318554 | -3.975625 | -1.630910 |
| 1  | -3.601095 | -0.499013 | 5.142820  | 1 | -4.623835 | -1.855116 | -1.386564 |
| 1  | -3.629255 | -2.936762 | 4.666760  | 6 | -3.457113 | -5.051830 | -1.416086 |
| 6  | 2.306916  | 0.644976  | -0.307745 | 1 | -1.557268 | -5.691123 | -0.616727 |
| 8  | 3.392604  | 0.866481  | -1.067415 | 1 | -5.272783 | -4.131550 | -2.123468 |
| 6  | 1.474477  | 1.815579  | -2.039379 | 1 | -3.742631 | -6.046733 | -1.742289 |
| 6  | 2.959810  | 1.485801  | -2.313658 | 6 | -0.620562 | 1.112328  | 1.755270  |
| 7  | 1.191509  | 1.117380  | -0.759256 | 8 | -0.436972 | 2.293318  | 2.353940  |
| 6  | 3.706629  | 2.811844  | -2.527272 | 6 | 0.668900  | 2.217187  | 0.249197  |
| 1  | 4.641522  | 2.826947  | -1.958246 | 6 | 0.255909  | 3.170042  | 1.405436  |
| 1  | 3.971453  | 2.930222  | -3.584971 | 7 | -0.037473 | 0.955148  | 0.610852  |
| 6  | 2.714540  | 3.869343  | -2.094883 | 6 | -0.714155 | 4.219330  | 0.816489  |
| 6  | 2.920913  | 5.239413  | -1.938812 | 1 | -1.705631 | 4.101339  | 1.266839  |
| 6  | 1.445813  | 3.319308  | -1.882002 | 1 | -0.380932 | 5.237278  | 1.041608  |
| 6  | 1.843639  | 6.049995  | -1.571928 | 6 | -0.713974 | 3.938754  | -0.670514 |
| 1  | 3.904204  | 5.673165  | -2.099595 | 6 | -1.380352 | 4.633029  | -1.678715 |
| 6  | 0.360951  | 4.125138  | -1.541114 | 6 | 0.099184  | 2.849382  | -0.994052 |
| 6  | 0.572164  | 5.497360  | -1.381019 | 6 | -1.220729 | 4.219029  | -3.003995 |
| 1  | 1.993450  | 7.118172  | -1.443547 | 1 | -2.009680 | 5.485981  | -1.443085 |
| 1  | -0.621834 | 3.691881  | -1.394588 | 6 | 0.279867  | 2.440664  | -2.314933 |
| 1  | -0.261998 | 6.139846  | -1.113200 | 6 | -0.395201 | 3.134059  | -3.322334 |
| 1  | 3.104468  | 0.741639  | -3.095224 | 1 | -1.730749 | 4.755984  | -3.797946 |
| 1  | 0.796311  | 1.425876  | -2.793952 | 1 | 0.937213  | 1.608965  | -2.545003 |
|    |           |           |           | 1 | -0.268990 | 2.837707  | -4.358689 |
|    |           |           |           | 1 | 1.092193  | 3.605151  | 1.949751  |
|    |           |           |           | 1 | 1.734248  | 1.991192  | 0.189513  |
|    |           |           |           | 8 | -0.137272 | -1.389379 | -2.337799 |
|    |           |           |           | 1 | -0.322907 | -2.334696 | -2.245125 |
| 28 | -0.156410 | -0.393750 | -0.700224 | 1 | 0.981470  | -1.096667 | -2.180303 |
| 6  | -2.156996 | -0.871872 | 1.767038  | 6 | 3.520172  | 0.313853  | 1.220504  |
| 6  | -1.435027 | 0.120053  | 2.468513  | 6 | 2.748633  | -0.681646 | 0.779571  |
| 6  | -1.486198 | 0.169095  | 3.866279  | 6 | 1.858940  | -1.647932 | 1.545787  |
| 6  | -2.222208 | -0.781923 | 4.572027  | 1 | 2.448721  | -2.257600 | 2.246531  |
| 6  | -2.920501 | -1.773408 | 3.884604  | 1 | 1.043717  | -1.182478 | 2.099481  |
| 6  | -2.893939 | -1.813319 | 2.487630  | 8 | 1.271239  | -2.502402 | 0.550162  |
| 1  | -0.938492 | 0.943743  | 4.390293  | 6 | 2.239587  | -2.582310 | -0.499213 |
| 1  | -2.247250 | -0.747283 | 5.655842  | 1 | 1.766709  | -3.011939 | -1.383810 |
| 1  | -3.492690 | -2.515545 | 4.431611  | 1 | 3.079084  | -3.223809 | -0.201547 |
| 1  | -3.446538 | -2.580893 | 1.957193  | 6 | 2.709912  | -1.123823 | -0.692009 |
| 15 | -2.167992 | -0.850173 | -0.061951 | 8 | 1.712092  | -0.378861 | -1.404043 |
| 6  | -3.406468 | 0.388289  | -0.528841 | 6 | 4.038953  | -1.030828 | -1.422207 |
| 6  | -4.595583 | 0.543085  | 0.200632  | 6 | 5.191955  | -1.596422 | -0.857873 |
| 6  | -3.147731 | 1.207073  | -1.638024 | 6 | 4.132591  | -0.410134 | -2.670084 |
| 6  | -5.523517 | 1.506681  | -0.188051 | 6 | 6.409374  | -1.547314 | -1.531673 |
| 1  | -4.789900 | -0.078935 | 1.068666  | 1 | 5.141473  | -2.060390 | 0.122625  |
| 6  | -4.081035 | 2.170402  | -2.017836 | 6 | 5.354426  | -0.358307 | -3.344918 |
| 1  | -2.220464 | 1.103398  | -2.190981 | 1 | 3.247727  | 0.036131  | -3.106635 |
| 6  | -5.266302 | 2.318866  | -1.296189 | 6 | 6.494522  | -0.927319 | -2.780752 |
| 1  | -6.443846 | 1.627169  | 0.374220  | 1 | 7.292712  | -1.988747 | -1.080617 |
| 1  | -3.872036 | 2.808295  | -2.869091 | 1 | 5.411907  | 0.129455  | -4.313220 |
| 1  | -5.990164 | 3.071424  | -1.592515 | 1 | 7.443670  | -0.886538 | -3.305681 |
| 6  | -2.724362 | -2.493615 | -0.582286 | 1 | 4.143303  | 0.792674  | 0.464956  |

**(S)-TS5B**

SCF Energy = -2532.587956

Gibbs Free Energy = -2531.903436

|   |          |           |          |   |          |           |           |
|---|----------|-----------|----------|---|----------|-----------|-----------|
| 6 | 3.774735 | 0.822294  | 2.627794 | 1 | 3.048968 | -2.957353 | -3.231804 |
| 6 | 5.028781 | 0.088743  | 3.157202 | 6 | 2.887189 | -1.544367 | -1.574147 |
| 1 | 5.310177 | 0.471238  | 4.144221 | 8 | 2.338955 | -0.233139 | -1.374753 |
| 1 | 4.842453 | -0.986056 | 3.246914 | 6 | 4.411181 | -1.442696 | -1.597719 |
| 1 | 5.879499 | 0.228418  | 2.483371 | 6 | 5.188684 | -2.597140 | -1.770025 |
| 6 | 2.604641 | 0.600901  | 3.600205 | 6 | 5.052048 | -0.208180 | -1.472931 |
| 1 | 2.841784 | 1.048093  | 4.570619 | 6 | 6.578834 | -2.518676 | -1.804074 |
| 1 | 1.687304 | 1.072125  | 3.236107 | 1 | 4.702168 | -3.566190 | -1.831702 |
| 1 | 2.405581 | -0.458716 | 3.776206 | 6 | 6.445918 | -0.129576 | -1.503499 |
| 6 | 4.076789 | 2.332195  | 2.548904 | 1 | 4.448948 | 0.679269  | -1.329439 |
| 1 | 3.216204 | 2.889722  | 2.163063 | 6 | 7.214197 | -1.281534 | -1.669150 |
| 1 | 4.319365 | 2.731041  | 3.538495 | 1 | 7.166844 | -3.423588 | -1.926071 |
| 1 | 4.925187 | 2.531445  | 1.886874 | 1 | 6.930918 | 0.836291  | -1.393560 |
|   |          |           |          | 1 | 8.298146 | -1.219293 | -1.690284 |
|   |          |           |          | 1 | 0.951093 | -4.067177 | -0.175726 |

**(S)-TS5D**

SCF Energy = -3501.417372

Gibbs Free Energy = -3500.642817

|    |           |           |           |    |           |           |           |
|----|-----------|-----------|-----------|----|-----------|-----------|-----------|
| 28 | 0.437265  | 0.274999  | -0.837816 | 6  | -3.755536 | 0.468373  | 3.152230  |
| 8  | -1.262847 | -2.255880 | 1.633725  | 6  | -4.439968 | 0.830183  | 1.992966  |
| 16 | -1.852041 | -2.553548 | 0.299381  | 6  | -3.734828 | 1.089446  | 0.819944  |
| 8  | -1.661654 | -3.947515 | -0.163109 | 1  | -1.826832 | 0.070880  | 4.027550  |
| 8  | -1.463166 | -1.543355 | -0.751416 | 1  | -4.302749 | 0.248069  | 4.062770  |
| 6  | -3.621653 | -2.313652 | 0.520303  | 1  | -5.522865 | 0.883598  | 1.990415  |
| 6  | -4.197234 | -2.597042 | 1.757582  | 1  | -4.272352 | 1.349393  | -0.083554 |
| 6  | -4.414325 | -1.864344 | -0.534265 | 15 | -1.413411 | 1.366290  | -0.731715 |
| 6  | -5.567919 | -2.422470 | 1.936396  | 6  | -0.957966 | 3.132481  | -0.612409 |
| 1  | -3.561060 | -2.921536 | 2.573089  | 6  | -0.978904 | 3.828811  | 0.601272  |
| 6  | -5.782207 | -1.683481 | -0.342635 | 6  | -0.446830 | 3.756208  | -1.762547 |
| 1  | -3.956368 | -1.630710 | -1.486447 | 6  | -0.504475 | 5.139278  | 0.662544  |
| 6  | -6.381330 | -1.961730 | 0.892915  | 1  | -1.364653 | 3.352089  | 1.495824  |
| 1  | -6.013890 | -2.635823 | 2.904851  | 6  | 0.007418  | 5.070397  | -1.698274 |
| 1  | -6.393236 | -1.315942 | -1.163542 | 1  | -0.402522 | 3.206018  | -2.697386 |
| 6  | -7.868197 | -1.792256 | 1.087409  | 6  | -0.018278 | 5.763141  | -0.485345 |
| 1  | -8.267382 | -0.996172 | 0.451478  | 1  | -0.513718 | 5.670014  | 1.609275  |
| 1  | -8.112171 | -1.553372 | 2.127051  | 1  | 0.393795  | 5.550303  | -2.592408 |
| 1  | -8.407366 | -2.712703 | 0.831381  | 1  | 0.349398  | 6.783358  | -0.434345 |
| 6  | 2.133639  | -2.762945 | 3.254102  | 6  | -2.589656 | 1.284144  | -2.118889 |
| 6  | 1.797508  | -2.719204 | 1.902952  | 6  | -2.680026 | 0.122193  | -2.898495 |
| 6  | 2.770155  | -2.470388 | 0.912739  | 6  | -3.414118 | 2.382119  | -2.408331 |
| 6  | 4.085913  | -2.216626 | 1.347167  | 6  | -3.593646 | 0.063455  | -3.950142 |
| 6  | 4.413062  | -2.237672 | 2.704200  | 1  | -2.066423 | -0.733995 | -2.647574 |
| 6  | 3.446076  | -2.525503 | 3.667706  | 6  | -4.330186 | 2.312294  | -3.457164 |
| 1  | 1.352673  | -2.962346 | 3.982518  | 1  | -3.335053 | 3.290616  | -1.820697 |
| 1  | 0.757349  | -2.836158 | 1.624969  | 6  | -4.419614 | 1.153503  | -4.230053 |
| 1  | 4.870922  | -2.015570 | 0.635459  | 1  | -3.660066 | -0.839135 | -4.549795 |
| 1  | 5.440031  | -2.045515 | 3.002278  | 1  | -4.968124 | 3.164065  | -3.672349 |
| 1  | 3.709555  | -2.555407 | 4.721315  | 1  | -5.129206 | 1.101796  | -5.050409 |
| 6  | 2.342855  | -2.512793 | -0.517110 | 6  | -0.185796 | 0.559015  | 2.011254  |
| 6  | 1.372340  | -3.366729 | -0.889196 | 8  | 0.360049  | 0.717445  | 3.225087  |
| 6  | 0.734176  | -3.419721 | -2.240241 | 6  | 2.009781  | 0.756604  | 1.542920  |
| 1  | 0.999988  | -4.362633 | -2.750920 | 6  | 1.818332  | 0.721683  | 3.079328  |
| 1  | -0.348858 | -3.395186 | -2.111512 | 7  | 0.648834  | 0.469710  | 1.026033  |
| 8  | 1.089884  | -2.317836 | -3.075505 | 6  | 2.395585  | 2.024926  | 3.650303  |
| 6  | 2.477339  | -2.054238 | -2.980763 | 1  | 1.718466  | 2.456884  | 4.393860  |
| 1  | 2.716112  | -1.283772 | -3.719063 | 1  | 3.345204  | 1.819491  | 4.159186  |

|   |          |           |           |    |           |           |           |
|---|----------|-----------|-----------|----|-----------|-----------|-----------|
| 6 | 2.605323 | 2.901744  | 2.435330  | 6  | -2.137791 | -0.988913 | 2.163106  |
| 6 | 2.967698 | 4.247264  | 2.389475  | 6  | -2.694977 | -1.384141 | 3.382882  |
| 6 | 2.430477 | 2.180195  | 1.250422  | 6  | -3.147274 | -2.692552 | 3.553837  |
| 6 | 3.151013 | 4.856558  | 1.146523  | 6  | -3.068570 | -3.597088 | 2.497238  |
| 1 | 3.106158 | 4.814994  | 3.305588  | 6  | -2.540792 | -3.198862 | 1.264644  |
| 6 | 2.618714 | 2.781813  | 0.007278  | 1  | -2.766869 | -0.666207 | 4.192026  |
| 6 | 2.980667 | 4.128501  | -0.035588 | 1  | -3.564246 | -2.998834 | 4.507183  |
| 1 | 3.427517 | 5.905668  | 1.097087  | 1  | -3.425546 | -4.614094 | 2.623510  |
| 1 | 2.481477 | 2.210205  | -0.903587 | 1  | -2.497724 | -3.903093 | 0.441689  |
| 1 | 3.118152 | 4.617043  | -0.994601 | 15 | -1.345784 | -1.330519 | -0.503550 |
| 1 | 2.186645 | -0.183959 | 3.554879  | 6  | -2.607152 | -0.221591 | -1.205556 |
| 1 | 2.704813 | 0.013271  | 1.163498  | 6  | -3.929956 | -0.206490 | -0.743706 |
| 8 | 0.568172 | 0.401375  | -2.740003 | 6  | -2.217937 | 0.648987  | -2.233934 |
| 1 | 0.271854 | -0.466329 | -3.074753 | 6  | -4.852830 | 0.676221  | -1.306355 |
| 1 | 1.676266 | 0.115822  | -2.339163 | 1  | -4.239308 | -0.879990 | 0.048293  |

**(S)-TS5\_iso**

SCF Energy = -2529.907656

Gibbs Free Energy = -2529.277998

|    |           |           |           |   |           |           |           |
|----|-----------|-----------|-----------|---|-----------|-----------|-----------|
| 28 | 0.470985  | -0.325254 | 0.286448  | 1 | -5.183023 | 2.217233  | -2.774142 |
| 6  | 3.395684  | 3.966438  | 0.001671  | 6 | -1.274003 | -2.795728 | -1.570807 |
| 6  | 2.937313  | 2.940423  | 0.823792  | 6 | -0.280757 | -3.760766 | -1.332393 |
| 6  | 2.611100  | 1.677888  | 0.294723  | 6 | -2.198729 | -2.986382 | -2.607732 |
| 6  | 2.749760  | 1.489744  | -1.093326 | 6 | -0.225077 | -4.907346 | -2.121332 |
| 6  | 3.227443  | 2.510313  | -1.913103 | 1 | 0.443111  | -3.600552 | -0.542991 |
| 6  | 3.549865  | 3.754594  | -1.370494 | 6 | -2.129887 | -4.133776 | -3.397218 |
| 1  | 3.631999  | 4.934566  | 0.432101  | 1 | -2.966664 | -2.244181 | -2.795018 |
| 1  | 2.819060  | 3.129313  | 1.886358  | 6 | -1.146794 | -5.094148 | -3.154354 |
| 1  | 2.477890  | 0.536657  | -1.528736 | 1 | 0.541205  | -5.653003 | -1.934366 |
| 1  | 3.336560  | 2.334781  | -2.978831 | 1 | -2.846635 | -4.277908 | -4.199278 |
| 1  | 3.910997  | 4.554486  | -2.008743 | 1 | -1.097436 | -5.986778 | -3.769884 |
| 6  | 2.072910  | 0.592117  | 1.140122  | 6 | -1.684380 | 0.400711  | 2.002262  |
| 6  | 2.143722  | 0.552247  | 2.485849  | 8 | -2.321196 | 1.320396  | 2.737730  |
| 6  | 1.571952  | -0.583868 | 3.282123  | 6 | -0.697729 | 2.316516  | 1.313814  |
| 1  | 2.254476  | -0.852401 | 4.104123  | 6 | -1.870021 | 2.633289  | 2.290237  |
| 1  | 0.615723  | -0.299233 | 3.738991  | 7 | -0.751530 | 0.833461  | 1.213037  |
| 8  | 1.294912  | -1.730898 | 2.490063  | 6 | -2.974567 | 3.343003  | 1.478237  |
| 6  | 2.445168  | -2.139200 | 1.769325  | 1 | -3.833743 | 2.671916  | 1.366964  |
| 1  | 2.299569  | -3.192632 | 1.507818  | 1 | -3.332206 | 4.244996  | 1.983540  |
| 1  | 3.345308  | -2.056540 | 2.386931  | 6 | -2.320185 | 3.643473  | 0.150769  |
| 6  | 2.613209  | -1.394418 | 0.442108  | 6 | -2.820153 | 4.424928  | -0.888859 |
| 8  | 1.664439  | -1.558755 | -0.433751 | 6 | -1.053246 | 3.061095  | 0.048087  |
| 6  | 3.994565  | -1.186417 | -0.057050 | 6 | -2.035358 | 4.619970  | -2.027352 |
| 6  | 5.026945  | -0.730714 | 0.776860  | 1 | -3.799756 | 4.886994  | -0.811225 |
| 6  | 4.270671  | -1.482967 | -1.400600 | 6 | -0.265308 | 3.255458  | -1.083926 |
| 6  | 6.312298  | -0.569320 | 0.272878  | 6 | -0.766979 | 4.038914  | -2.124271 |
| 1  | 4.811255  | -0.456050 | 1.803927  | 1 | -2.409750 | 5.236738  | -2.838660 |
| 6  | 5.561548  | -1.332330 | -1.898666 | 1 | 0.723354  | 2.823543  | -1.153069 |
| 1  | 3.464653  | -1.835935 | -2.033920 | 1 | -0.158724 | 4.209644  | -3.007064 |
| 6  | 6.582497  | -0.871197 | -1.065287 | 1 | -1.570949 | 3.182279  | 3.182731  |
| 1  | 7.103307  | -0.200629 | 0.917604  | 1 | 0.288181  | 2.590126  | 1.693818  |
| 1  | 5.772050  | -1.572387 | -2.935863 |   |           |           |           |
| 1  | 7.587027  | -0.744464 | -1.456257 |   |           |           |           |
| 1  | 2.635807  | 1.333812  | 3.069460  |   |           |           |           |
| 6  | -2.066563 | -1.900315 | 1.084930  |   |           |           |           |

**(S)-TS5**

SCF Energy = -2529.919805

Gibbs Free Energy = -2529.289366

|    |           |           |           |    |           |           |           |
|----|-----------|-----------|-----------|----|-----------|-----------|-----------|
| 28 | -0.162661 | -0.555004 | 0.109563  | 1  | 4.017222  | -0.521449 | -3.034367 |
| 6  | -5.078981 | 1.390427  | 0.463983  | 1  | 5.611260  | 1.368127  | -2.764400 |
| 6  | -4.183456 | 0.754013  | -0.390324 | 6  | -0.499467 | 2.684980  | -1.146312 |
| 6  | -2.937463 | 0.303794  | 0.076572  | 6  | -1.717827 | 3.143537  | -0.619258 |
| 6  | -2.646753 | 0.458488  | 1.442863  | 6  | -0.136586 | 3.031146  | -2.456357 |
| 6  | -3.541761 | 1.095104  | 2.300984  | 6  | -2.562594 | 3.928755  | -1.400030 |
| 6  | -4.757945 | 1.573203  | 1.811634  | 1  | -2.015331 | 2.877485  | 0.387921  |
| 1  | -6.034148 | 1.736616  | 0.081368  | 6  | -0.990571 | 3.812765  | -3.234089 |
| 1  | -4.451131 | 0.602131  | -1.430861 | 1  | 0.807909  | 2.690331  | -2.866218 |
| 1  | -1.704126 | 0.084127  | 1.832894  | 6  | -2.205360 | 4.257971  | -2.709760 |
| 1  | -3.291180 | 1.212936  | 3.350613  | 1  | -3.504631 | 4.272502  | -0.985796 |
| 1  | -5.458522 | 2.067212  | 2.477188  | 1  | -0.703672 | 4.077646  | -4.246745 |
| 6  | -1.944277 | -0.297439 | -0.838300 | 1  | -2.868686 | 4.865506  | -3.317156 |
| 6  | -1.884463 | 0.011522  | -2.153193 | 6  | 1.785533  | 0.043172  | 2.214342  |
| 6  | -0.947673 | -0.658076 | -3.105369 | 8  | 2.713272  | -0.455930 | 3.039841  |
| 1  | -1.490812 | -0.927812 | -4.026663 | 6  | 1.978708  | -2.092314 | 1.483792  |
| 1  | -0.144865 | 0.029979  | -3.399233 | 6  | 2.989870  | -1.832927 | 2.637772  |
| 8  | -0.318069 | -1.801431 | -2.555481 | 7  | 1.305151  | -0.773050 | 1.330491  |
| 6  | -1.273035 | -2.691126 | -1.988495 | 6  | 4.413690  | -1.955729 | 2.055312  |
| 1  | -0.787439 | -3.668055 | -1.908573 | 1  | 4.941615  | -1.001959 | 2.159935  |
| 1  | -2.144431 | -2.786173 | -2.643691 | 1  | 4.997896  | -2.705163 | 2.599030  |
| 6  | -1.662735 | -2.275078 | -0.566913 | 6  | 4.196696  | -2.353958 | 0.612870  |
| 8  | -0.665277 | -2.325458 | 0.293201  | 6  | 5.161329  | -2.643431 | -0.351161 |
| 6  | -3.011538 | -2.670016 | -0.065508 | 6  | 2.838944  | -2.469270 | 0.302599  |
| 6  | -4.147671 | -2.648700 | -0.888107 | 6  | 4.747736  | -3.059844 | -1.618708 |
| 6  | -3.145291 | -3.038184 | 1.279298  | 1  | 6.219004  | -2.560998 | -0.119160 |
| 6  | -5.391062 | -3.005557 | -0.377594 | 6  | 2.420612  | -2.897017 | -0.955090 |
| 1  | -4.071196 | -2.319177 | -1.919015 | 6  | 3.386810  | -3.191658 | -1.918070 |
| 6  | -4.391112 | -3.395799 | 1.788950  | 1  | 5.490627  | -3.296659 | -2.374233 |
| 1  | -2.261119 | -3.044310 | 1.905191  | 1  | 1.365724  | -2.981835 | -1.176501 |
| 6  | -5.515829 | -3.380517 | 0.962896  | 1  | 3.079592  | -3.528503 | -2.903240 |
| 1  | -6.265148 | -2.984022 | -1.020414 | 1  | 2.829030  | -2.448543 | 3.522497  |
| 1  | -4.485260 | -3.686340 | 2.830454  | 1  | 1.209108  | -2.832874 | 1.705673  |
| 1  | -6.487420 | -3.655830 | 1.360694  |    |           |           |           |
| 1  | -2.527572 | 0.779569  | -2.584249 |    |           |           |           |
| 6  | 0.841627  | 2.250542  | 1.425837  |    |           |           |           |
| 6  | 1.433427  | 1.455525  | 2.434845  |    |           |           |           |
| 6  | 1.735727  | 2.022301  | 3.679901  |    |           |           |           |
| 6  | 1.439194  | 3.359245  | 3.937873  | 28 | 0.146700  | -0.861060 | -0.571379 |
| 6  | 0.858834  | 4.144906  | 2.944654  | 6  | 1.874570  | -1.705549 | 0.040779  |
| 6  | 0.570342  | 3.593875  | 1.693511  | 6  | 2.013457  | -2.006164 | 1.350270  |
| 1  | 2.201540  | 1.407364  | 4.440373  | 6  | 0.891936  | -2.524251 | 2.191934  |
| 1  | 1.668123  | 3.783921  | 4.909361  | 1  | 1.262538  | -3.327026 | 2.849686  |
| 1  | 0.634553  | 5.189411  | 3.135250  | 1  | 0.501221  | -1.731487 | 2.842286  |
| 1  | 0.131116  | 4.215495  | 0.922413  | 8  | -0.209629 | -2.991376 | 1.428412  |
| 15 | 0.519622  | 1.503254  | -0.211502 | 6  | 0.213157  | -3.892952 | 0.415645  |
| 6  | 2.151725  | 1.483271  | -1.020153 | 1  | -0.660579 | -4.494970 | 0.143687  |
| 6  | 3.054159  | 2.545055  | -0.858573 | 1  | 1.000648  | -4.559694 | 0.787957  |
| 6  | 2.500540  | 0.381167  | -1.812786 | 6  | 0.671188  | -3.171026 | -0.853971 |
| 6  | 4.295092  | 2.501659  | -1.490002 | 8  | -0.232438 | -2.460784 | -1.463148 |
| 1  | 2.790378  | 3.395609  | -0.238051 | 1  | 2.965189  | -1.873289 | 1.865934  |
| 6  | 3.745113  | 0.343803  | -2.441004 | 6  | 0.488013  | 2.374008  | -0.595959 |
| 1  | 1.816219  | -0.453221 | -1.920963 | 6  | -0.428058 | 2.369778  | -1.673412 |
| 6  | 4.640524  | 1.401357  | -2.279860 | 6  | -0.471168 | 3.457782  | -2.554862 |
| 1  | 4.993779  | 3.322471  | -1.363338 | 6  | 0.396410  | 4.535626  | -2.388784 |
|    |           |           |           | 6  | 1.297125  | 4.543538  | -1.326117 |

(S)-TS5\_p

SCF Energy = -2338.15764

Gibbs Free Energy = -2337.575454

|    |           |           |           |    |           |           |           |
|----|-----------|-----------|-----------|----|-----------|-----------|-----------|
| 6  | 1.335278  | 3.471610  | -0.430684 | 1  | 6.417223  | -1.437058 | -0.977704 |
| 1  | -1.186533 | 3.449888  | -3.368273 | 1  | 3.670909  | 0.634086  | -3.557252 |
| 1  | 0.361181  | 5.367401  | -3.084084 | 1  | 6.005901  | 0.045030  | -2.930894 |
| 1  | 1.967969  | 5.384665  | -1.184441 | 6  | 1.686143  | -3.883911 | -1.712223 |
| 1  | 2.029168  | 3.492531  | 0.401103  | 1  | 2.529817  | -4.258333 | -1.130499 |
| 15 | 0.475999  | 0.971721  | 0.576693  | 1  | 1.174857  | -4.735231 | -2.179947 |
| 6  | -0.973621 | 1.286468  | 1.634022  | 1  | 2.045175  | -3.227066 | -2.504298 |
| 6  | -1.310266 | 2.589311  | 2.030446  |    |           |           |           |
| 6  | -1.757605 | 0.201812  | 2.050548  |    |           |           |           |
| 6  | -2.423373 | 2.800721  | 2.840999  |    |           |           |           |
| 1  | -0.710037 | 3.431950  | 1.702257  |    |           |           |           |
| 6  | -2.870746 | 0.421149  | 2.861538  |    |           |           |           |
| 1  | -1.515858 | -0.804554 | 1.726546  | 28 | -0.164969 | 0.828549  | -0.353814 |
| 6  | -3.203351 | 1.717438  | 3.255492  | 6  | -1.915669 | 1.455245  | 0.428680  |
| 1  | -2.684612 | 3.808954  | 3.146186  | 6  | -2.048503 | 1.480441  | 1.772536  |
| 1  | -3.484970 | -0.419489 | 3.162698  | 6  | -0.935860 | 1.862382  | 2.694467  |
| 1  | -4.073685 | 1.887026  | 3.881554  | 1  | -1.325935 | 2.504606  | 3.500707  |
| 6  | 1.936880  | 1.155143  | 1.644705  | 1  | -0.509703 | 0.971268  | 3.172472  |
| 6  | 3.220731  | 1.252984  | 1.083520  | 8  | 0.138414  | 2.511323  | 2.032529  |
| 6  | 1.794521  | 1.062328  | 3.037067  | 6  | -0.328308 | 3.584969  | 1.227056  |
| 6  | 4.343379  | 1.246541  | 1.907580  | 1  | 0.522384  | 4.257414  | 1.077714  |
| 1  | 3.347175  | 1.318063  | 0.009545  | 1  | -1.130057 | 4.135407  | 1.734927  |
| 6  | 2.923794  | 1.050909  | 3.855462  | 6  | -0.786533 | 3.119440  | -0.158218 |
| 1  | 0.806154  | 0.998323  | 3.478870  | 8  | 0.134150  | 2.587631  | -0.909584 |
| 6  | 4.198229  | 1.137663  | 3.292732  | 1  | -2.987065 | 1.207407  | 2.256003  |
| 1  | 5.331083  | 1.316919  | 1.463995  | 6  | -0.379328 | -2.346081 | -1.027368 |
| 1  | 2.806497  | 0.979518  | 4.932052  | 6  | 0.513969  | -2.085416 | -2.092360 |
| 1  | 5.075612  | 1.127754  | 3.931549  | 6  | 0.580198  | -2.968548 | -3.177777 |
| 6  | -1.381491 | 1.268410  | -1.885949 | 6  | -0.242961 | -4.092043 | -3.224768 |
| 8  | -2.458688 | 1.572534  | -2.619451 | 6  | -1.120778 | -4.352990 | -2.175009 |
| 6  | -2.510804 | -0.694194 | -1.915125 | 6  | -1.180825 | -3.488329 | -1.079077 |
| 6  | -3.329412 | 0.400739  | -2.658186 | 1  | 1.278404  | -2.766190 | -3.980933 |
| 7  | -1.302828 | 0.048113  | -1.457850 | 1  | -0.190798 | -4.762700 | -4.075672 |
| 6  | -4.621333 | 0.653041  | -1.851944 | 1  | -1.756439 | -5.232151 | -2.199776 |
| 1  | -4.635570 | 1.685930  | -1.487991 | 1  | -1.855806 | -3.706786 | -0.260289 |
| 1  | -5.509620 | 0.523009  | -2.478314 | 15 | -0.397606 | -1.210143 | 0.405059  |
| 6  | -4.569570 | -0.362458 | -0.732972 | 6  | 1.085830  | -1.668827 | 1.357428  |
| 6  | -5.528888 | -0.606496 | 0.248722  | 6  | 1.489495  | -3.007722 | 1.467273  |
| 6  | -3.409337 | -1.139548 | -0.787670 | 6  | 1.827122  | -0.658555 | 1.985702  |
| 6  | -5.315357 | -1.642264 | 1.161296  | 6  | 2.626968  | -3.329897 | 2.204263  |
| 1  | -6.436106 | -0.011623 | 0.297111  | 1  | 0.921865  | -3.790978 | 0.975015  |
| 6  | -3.197238 | -2.181761 | 0.111281  | 6  | 2.964424  | -0.988762 | 2.722140  |
| 6  | -4.159856 | -2.429011 | 1.090890  | 1  | 1.533010  | 0.380363  | 1.883234  |
| 1  | -6.060383 | -1.847089 | 1.924014  | 6  | 3.364078  | -2.321006 | 2.830619  |
| 1  | -2.294918 | -2.774152 | 0.050272  | 1  | 2.940143  | -4.365713 | 2.287580  |
| 1  | -4.012562 | -3.238657 | 1.798780  | 1  | 3.544824  | -0.201279 | 3.188633  |
| 1  | -3.510607 | 0.187558  | -3.711316 | 1  | 4.253237  | -2.575448 | 3.398827  |
| 1  | -2.173826 | -1.519072 | -2.544525 | 6  | -1.826758 | -1.668090 | 1.432942  |
| 6  | 3.011542  | -1.279241 | -0.802065 | 6  | -3.117575 | -1.705721 | 0.880528  |
| 6  | 4.335497  | -1.635440 | -0.488698 | 6  | -1.658231 | -1.852230 | 2.813189  |
| 6  | 2.795411  | -0.474323 | -1.935583 | 6  | -4.221689 | -1.913161 | 1.703488  |
| 6  | 5.402654  | -1.155984 | -1.242663 | 1  | -3.264225 | -1.558742 | -0.182669 |
| 1  | 4.528646  | -2.291404 | 0.354040  | 6  | -2.769290 | -2.054133 | 3.631755  |
| 6  | 3.862868  | 0.005543  | -2.693285 | 1  | -0.663802 | -1.836839 | 3.245678  |
| 1  | 1.778895  | -0.211325 | -2.215984 | 6  | -4.051186 | -2.079577 | 3.080028  |
| 6  | 5.172404  | -0.325143 | -2.342761 | 1  | -5.215192 | -1.934701 | 1.267830  |

(S)-TS5\_q

SCF Energy = -2377.479034

Gibbs Free Energy = -2376.870045

|    |           |           |           |    |           |           |           |
|----|-----------|-----------|-----------|----|-----------|-----------|-----------|
| 1  | -2.631741 | -2.196503 | 4.698860  | 1  | -3.462605 | -0.822838 | 3.318152  |
| 1  | -4.914363 | -2.235855 | 3.719162  | 15 | -1.518050 | -0.394692 | 1.120270  |
| 6  | 1.421352  | -0.926206 | -2.086182 | 6  | -2.367250 | 0.434289  | -0.269627 |
| 8  | 2.496881  | -1.031922 | -2.875787 | 6  | -3.706507 | 0.843988  | -0.162741 |
| 6  | 2.474506  | 1.046089  | -1.727380 | 6  | -1.648505 | 0.703687  | -1.437657 |
| 6  | 3.325101  | 0.154179  | -2.677144 | 6  | -4.323945 | 1.491084  | -1.230586 |
| 7  | 1.303917  | 0.177858  | -1.418735 | 1  | -4.259538 | 0.665326  | 0.754326  |
| 6  | 4.631549  | -0.208741 | -1.938908 | 6  | -2.265513 | 1.369031  | -2.496794 |
| 1  | 4.680366  | -1.291735 | -1.782897 | 1  | -0.613895 | 0.398158  | -1.509969 |
| 1  | 5.510130  | 0.068491  | -2.530073 | 6  | -3.601335 | 1.755737  | -2.398204 |
| 6  | 4.557963  | 0.567035  | -0.643222 | 1  | -5.361370 | 1.801093  | -1.147599 |
| 6  | 5.519424  | 0.649480  | 0.362869  | 1  | -1.691074 | 1.587365  | -3.388678 |
| 6  | 3.370698  | 1.297015  | -0.539699 | 1  | -4.079191 | 2.274937  | -3.223975 |
| 6  | 5.280255  | 1.478451  | 1.461458  | 6  | -2.288750 | -2.025996 | 1.336291  |
| 1  | 6.447297  | 0.090009  | 0.290024  | 6  | -1.671831 | -2.933097 | 2.214289  |
| 6  | 3.133110  | 2.135722  | 0.546255  | 6  | -3.442276 | -2.405242 | 0.633922  |
| 6  | 4.097549  | 2.221499  | 1.551210  | 6  | -2.221588 | -4.202425 | 2.390905  |
| 1  | 6.026242  | 1.557128  | 2.246371  | 1  | -0.744098 | -2.646034 | 2.700135  |
| 1  | 2.210986  | 2.696917  | 0.604726  | 6  | -3.979456 | -3.678531 | 0.815183  |
| 1  | 3.930408  | 2.871561  | 2.404318  | 1  | -3.905458 | -1.718116 | -0.063987 |
| 1  | 3.490697  | 0.582410  | -3.665315 | 6  | -3.372072 | -4.576950 | 1.694890  |
| 1  | 2.095281  | 1.964090  | -2.178692 | 1  | -1.738158 | -4.905542 | 3.062111  |
| 6  | -3.047542 | 1.155997  | -0.474007 | 1  | -4.869126 | -3.970095 | 0.265069  |
| 6  | -4.379383 | 1.391130  | -0.088322 | 1  | -3.789919 | -5.570193 | 1.829415  |
| 6  | -2.817579 | 0.595737  | -1.743907 | 6  | -0.528208 | 2.474206  | 1.788242  |
| 6  | -5.438420 | 1.024978  | -0.913995 | 8  | -0.371874 | 3.807827  | 1.814158  |
| 1  | -4.584834 | 1.863241  | 0.867015  | 6  | 1.190515  | 2.783725  | 0.343096  |
| 6  | -3.876828 | 0.229839  | -2.573257 | 6  | 0.756167  | 4.150140  | 0.955854  |
| 1  | -1.795920 | 0.433976  | -2.077050 | 7  | 0.282541  | 1.814870  | 1.023791  |
| 6  | -5.192815 | 0.433541  | -2.156271 | 6  | 0.292668  | 5.067530  | -0.189663 |
| 1  | -6.458968 | 1.208579  | -0.592520 | 1  | -0.732555 | 5.405340  | -0.005337 |
| 1  | -3.673581 | -0.210635 | -3.544362 | 1  | 0.920127  | 5.963825  | -0.249487 |
| 1  | -6.020074 | 0.151709  | -2.799599 | 6  | 0.428974  | 4.217135  | -1.430199 |
| 6  | -1.845504 | 3.954260  | -0.846069 | 6  | 0.148330  | 4.584838  | -2.745580 |
| 1  | -2.684925 | 4.128474  | -0.167034 | 6  | 0.966330  | 2.957802  | -1.146128 |
| 1  | -2.219468 | 3.398582  | -1.708143 | 6  | 0.434338  | 3.686117  | -3.774737 |
| 6  | -1.237055 | 5.291547  | -1.309817 | 1  | -0.272321 | 5.561448  | -2.968621 |
| 1  | -1.989931 | 5.873179  | -1.847674 | 6  | 1.282708  | 2.068048  | -2.172580 |
| 1  | -0.889597 | 5.897008  | -0.466888 | 6  | 1.007342  | 2.441926  | -3.489018 |
| 1  | -0.392437 | 5.118307  | -1.981506 | 1  | 0.224724  | 3.962018  | -4.804190 |
|    |           |           |           | 1  | 1.696011  | 1.093572  | -1.940881 |
|    |           |           |           | 1  | 1.240335  | 1.755511  | -4.297301 |
|    |           |           |           | 1  | 1.507503  | 4.607777  | 1.601399  |
|    |           |           |           | 1  | 2.217817  | 2.487834  | 0.572375  |
|    |           |           |           | 14 | 3.388851  | -0.255109 | 1.596897  |
| 28 | 0.645693  | -0.076715 | 1.260345  | 8  | 4.047514  | 0.987028  | 0.709944  |
| 8  | 1.080653  | -1.691185 | 1.968986  | 8  | 3.779862  | -1.605913 | 0.771785  |
| 6  | -2.101081 | 0.632037  | 2.526532  | 6  | 4.528275  | 0.828063  | -0.640385 |
| 6  | -1.576608 | 1.938869  | 2.676265  | 1  | 3.939373  | 0.066647  | -1.157545 |
| 6  | -2.050850 | 2.761776  | 3.705995  | 1  | 4.360718  | 1.790206  | -1.137951 |
| 6  | -3.012288 | 2.294127  | 4.600294  | 6  | 6.003419  | 0.463613  | -0.652080 |
| 6  | -3.513050 | 1.001078  | 4.466017  | 1  | 6.149516  | -0.516149 | -0.189927 |
| 6  | -3.063600 | 0.179416  | 3.429044  | 1  | 6.372570  | 0.414094  | -1.682348 |
| 1  | -1.651026 | 3.763692  | 3.804919  | 1  | 6.593617  | 1.205679  | -0.104874 |
| 1  | -3.362548 | 2.938272  | 5.400106  | 6  | 3.880865  | -2.960603 | 1.218961  |
| 1  | -4.258247 | 0.628837  | 5.162306  | 1  | 4.402876  | -2.991688 | 2.185604  |

**(S)-TS6D**

SCF Energy = -3332.475813

Gibbs Free Energy = -3331.795010

|    |           |           |           |    |           |           |           |
|----|-----------|-----------|-----------|----|-----------|-----------|-----------|
| 1  | 2.877477  | -3.364325 | 1.353251  | 8  | 1.630966  | -0.997898 | -1.037772 |
| 6  | 4.632747  | -3.744132 | 0.159157  | 6  | 3.650825  | -2.268092 | -0.536031 |
| 1  | 4.110691  | -3.654059 | -0.795919 | 6  | 4.669719  | -2.645028 | 0.348484  |
| 1  | 5.651447  | -3.360697 | 0.039740  | 6  | 3.781229  | -2.577234 | -1.892906 |
| 1  | 4.689520  | -4.801238 | 0.440593  | 6  | 5.802594  | -3.307975 | -0.116249 |
| 6  | 3.982538  | -0.288936 | 3.365757  | 1  | 4.585134  | -2.398021 | 1.402522  |
| 1  | 3.345610  | -0.960476 | 3.948847  | 6  | 4.919021  | -3.239449 | -2.358609 |
| 1  | 5.017135  | -0.640946 | 3.425707  | 1  | 3.013344  | -2.281812 | -2.598564 |
| 1  | 3.928443  | 0.710976  | 3.807229  | 6  | 5.931674  | -3.606955 | -1.474051 |
| 1  | 2.040545  | 0.441123  | 1.835273  | 1  | 6.587141  | -3.585305 | 0.580676  |
| 1  | 1.075048  | -2.304634 | 1.205350  | 1  | 5.011237  | -3.464675 | -3.416546 |
| 8  | 2.641224  | -2.164654 | -2.362041 | 1  | 6.816193  | -4.119494 | -1.838325 |
| 16 | 1.482580  | -1.981222 | -1.469274 | 1  | 1.966501  | 0.176546  | 2.961294  |
| 8  | 1.453939  | -0.595710 | -0.848627 | 6  | -1.586320 | 2.142130  | -1.428294 |
| 8  | 1.239135  | -3.050565 | -0.460018 | 6  | -2.558644 | 1.474589  | -2.206188 |
| 6  | 0.016579  | -1.985018 | -2.508040 | 6  | -3.263849 | 2.159330  | -3.203901 |
| 6  | 0.038585  | -1.308253 | -3.727601 | 6  | -2.996991 | 3.503485  | -3.451632 |
| 6  | -1.161329 | -2.566256 | -2.042905 | 6  | -2.039307 | 4.168402  | -2.688678 |
| 6  | -1.138203 | -1.181747 | -4.461207 | 6  | -1.342708 | 3.493835  | -1.682600 |
| 1  | 0.973841  | -0.894994 | -4.090094 | 1  | -4.014373 | 1.629845  | -3.778720 |
| 6  | -2.331559 | -2.433669 | -2.788022 | 1  | -3.536647 | 4.026643  | -4.233564 |
| 1  | -1.148011 | -3.110408 | -1.106342 | 1  | -1.829122 | 5.217210  | -2.871269 |
| 6  | -2.344288 | -1.723187 | -3.993437 | 1  | -0.604064 | 4.026873  | -1.097283 |
| 1  | -1.126379 | -0.648760 | -5.408722 | 15 | -0.656486 | 1.259436  | -0.098674 |
| 1  | -3.251530 | -2.878650 | -2.418377 | 6  | -1.767572 | 1.276696  | 1.351272  |
| 6  | -3.632660 | -1.500920 | -4.743530 | 6  | -3.160741 | 1.316409  | 1.200379  |
| 1  | -4.321938 | -2.341166 | -4.617700 | 6  | -1.222338 | 1.176289  | 2.640639  |
| 1  | -3.457677 | -1.359773 | -5.814086 | 6  | -3.990447 | 1.243478  | 2.316826  |
| 1  | -4.139304 | -0.601972 | -4.369755 | 1  | -3.607842 | 1.418269  | 0.219602  |
|    |           |           |           | 6  | -2.056495 | 1.112378  | 3.755440  |
|    |           |           |           | 1  | -0.147168 | 1.171690  | 2.771449  |
|    |           |           |           | 6  | -3.442238 | 1.137749  | 3.594745  |
|    |           |           |           | 1  | -5.066621 | 1.263188  | 2.185007  |
|    |           |           |           | 1  | -1.622346 | 1.046072  | 4.748060  |
|    |           |           |           | 1  | -4.091657 | 1.080906  | 4.462112  |
| 28 | -0.313839 | -0.749550 | -0.973805 | 6  | 0.715471  | 2.396204  | 0.234612  |
| 6  | 5.287765  | 2.050623  | 1.860303  | 6  | 1.773882  | 2.405297  | -0.684849 |
| 6  | 4.239965  | 1.148009  | 2.014398  | 6  | 0.657161  | 3.372145  | 1.242306  |
| 6  | 3.747825  | 0.407864  | 0.925200  | 6  | 2.755071  | 3.390293  | -0.603293 |
| 6  | 4.362416  | 0.600520  | -0.324636 | 6  | 1.829457  | 1.641634  | -1.452988 |
| 6  | 5.429633  | 1.482321  | -0.474334 | 1  | 1.665436  | 4.329009  | 1.339312  |
| 6  | 5.895553  | 2.217920  | 0.614486  | 6  | -0.174365 | 3.397830  | 1.935815  |
| 1  | 5.647254  | 2.605760  | 2.721153  | 1  | 2.711683  | 4.341693  | 0.414743  |
| 1  | 3.823179  | 1.001633  | 3.004920  | 6  | 3.571703  | 3.392397  | -1.314190 |
| 1  | 4.000710  | 0.063735  | -1.189933 | 1  | 1.624334  | 5.073275  | 2.128129  |
| 1  | 5.892834  | 1.597391  | -1.449653 | 1  | 3.491635  | 5.092450  | 0.487140  |
| 1  | 6.728470  | 2.904313  | 0.498993  | 6  | -2.899220 | 0.075754  | -1.941144 |
| 6  | 2.640991  | -0.564958 | 1.101198  | 6  | -4.110875 | -0.330325 | -2.323919 |
| 6  | 1.831668  | -0.562708 | 2.176831  | 8  | -2.997432 | -2.015120 | -1.099700 |
| 6  | 0.749558  | -1.571142 | 2.431687  | 6  | -4.254907 | -1.747874 | -1.975064 |
| 1  | 1.069918  | -2.270448 | 3.224347  | 6  | -2.172462 | -0.798744 | -1.321232 |
| 1  | -0.169571 | -1.091898 | 2.775351  | 7  | -5.492571 | -1.939747 | -1.089258 |
| 8  | 0.399166  | -2.308949 | 1.266048  | 6  | -6.213092 | -1.133166 | -1.254466 |
| 6  | 1.574774  | -2.784287 | 0.633716  | 1  | -5.997116 | -2.877785 | -1.348091 |
| 1  | 1.272679  | -3.481757 | -0.149455 | 1  | -4.934172 | -1.989435 | 0.314991  |
| 1  | 2.200900  | -3.331916 | 1.349437  | 6  | -5.631025 | -1.999552 | 1.522554  |
| 6  | 2.384258  | -1.622908 | 0.023186  | 6  |           |           |           |

**(S)-TS6\_iso**

SCF Energy = -2606.379719

Gibbs Free Energy = -2605.722730



|   |           |           |           |
|---|-----------|-----------|-----------|
| 6 | -3.540011 | -2.092959 | 0.310098  |
| 6 | -4.913565 | -2.119247 | 2.714496  |
| 1 | -6.714365 | -1.925288 | 1.538149  |
| 6 | -2.819160 | -2.229591 | 1.494082  |
| 6 | -3.519433 | -2.239631 | 2.700382  |
| 1 | -5.444571 | -2.128786 | 3.661271  |
| 1 | -1.741424 | -2.336929 | 1.469730  |
| 1 | -2.979054 | -2.340447 | 3.636048  |
| 1 | -4.284833 | -2.296603 | -2.917184 |
| 1 | -2.426435 | -2.892030 | -1.408296 |
| 8 | 0.062985  | -2.242398 | -2.173405 |
| 1 | -0.128320 | -3.121069 | -1.819012 |
| 1 | 1.150307  | -1.817779 | -1.745696 |

**(S)-TS6**

SCF Energy = -2606.395347

Gibbs Free Energy = -2605.742477

|    |           |           |           |
|----|-----------|-----------|-----------|
| 28 | -0.098777 | -0.447816 | -0.566295 |
| 6  | 0.232142  | -1.942845 | 3.199156  |
| 6  | 0.674700  | -2.367378 | 1.949533  |
| 6  | 1.881399  | -1.898838 | 1.392349  |
| 6  | 2.624463  | -0.968638 | 2.139858  |
| 6  | 2.180367  | -0.541423 | 3.391350  |
| 6  | 0.985664  | -1.022437 | 3.928018  |
| 1  | -0.706695 | -2.316964 | 3.595483  |
| 1  | 0.078965  | -3.073966 | 1.381602  |
| 1  | 3.564573  | -0.596011 | 1.759713  |
| 1  | 2.786435  | 0.157797  | 3.960106  |
| 1  | 0.647072  | -0.686528 | 4.902816  |
| 6  | 2.286824  | -2.416109 | 0.055397  |
| 6  | 2.091848  | -3.714790 | -0.237320 |
| 6  | 2.231935  | -4.283039 | -1.619262 |
| 1  | 3.163715  | -4.868520 | -1.714109 |
| 1  | 1.402881  | -4.966565 | -1.832373 |
| 8  | 2.189921  | -3.265695 | -2.607158 |
| 6  | 3.159620  | -2.279299 | -2.302356 |
| 1  | 3.217546  | -1.594987 | -3.151001 |
| 1  | 4.143198  | -2.746503 | -2.153419 |
| 6  | 2.768968  | -1.460264 | -1.046014 |
| 8  | 1.702932  | -0.587282 | -1.430303 |
| 6  | 4.010020  | -0.655428 | -0.674683 |
| 6  | 5.087049  | -1.276589 | -0.027016 |
| 6  | 4.135161  | 0.679094  | -1.070214 |
| 6  | 6.248147  | -0.562502 | 0.261266  |
| 1  | 5.002277  | -2.317092 | 0.274252  |
| 6  | 5.298173  | 1.396360  | -0.778643 |
| 1  | 3.320141  | 1.149126  | -1.606462 |
| 6  | 6.354297  | 0.781388  | -0.107545 |
| 1  | 7.069594  | -1.053451 | 0.773725  |
| 1  | 5.378813  | 2.434672  | -1.086328 |
| 1  | 7.257935  | 1.338550  | 0.118355  |
| 1  | 1.786110  | -4.406095 | 0.544557  |
| 6  | -2.559447 | -0.152153 | 1.593263  |
| 6  | -1.672557 | 0.591155  | 2.399957  |
| 6  | -1.978401 | 0.805501  | 3.749619  |

|    |           |           |           |
|----|-----------|-----------|-----------|
| 6  | -3.133180 | 0.259318  | 4.305292  |
| 6  | -3.999195 | -0.495583 | 3.514370  |
| 6  | -3.716270 | -0.692627 | 2.161411  |
| 1  | -1.295990 | 1.386176  | 4.357704  |
| 1  | -3.353670 | 0.421407  | 5.354995  |
| 1  | -4.898007 | -0.925089 | 3.944418  |
| 1  | -4.397517 | -1.267311 | 1.543768  |
| 15 | -2.215257 | -0.355599 | -0.180437 |
| 6  | -2.868042 | 1.114121  | -1.019608 |
| 6  | -3.628206 | 2.080405  | -0.348957 |
| 6  | -2.527210 | 1.293216  | -2.371069 |
| 6  | -4.045803 | 3.223786  | -1.030458 |
| 1  | -3.889990 | 1.944570  | 0.694833  |
| 6  | -2.958123 | 2.433012  | -3.043842 |
| 1  | -1.923721 | 0.547664  | -2.880098 |
| 6  | -3.711660 | 3.400081  | -2.373799 |
| 1  | -4.632741 | 3.974747  | -0.511616 |
| 1  | -2.696101 | 2.572781  | -4.087486 |
| 1  | -4.036831 | 4.292353  | -2.899076 |
| 6  | -3.164627 | -1.800456 | -0.724330 |
| 6  | -2.700343 | -3.076527 | -0.364981 |
| 6  | -4.328354 | -1.669173 | -1.491238 |
| 6  | -3.400750 | -4.210439 | -0.766841 |
| 1  | -1.798770 | -3.175545 | 0.232615  |
| 6  | -5.023701 | -2.810775 | -1.893495 |
| 1  | -4.683506 | -0.684815 | -1.775996 |
| 6  | -4.562238 | -4.077259 | -1.533810 |
| 1  | -3.042827 | -5.195943 | -0.486548 |
| 1  | -5.924558 | -2.708615 | -2.489692 |
| 1  | -5.104700 | -4.961797 | -1.851474 |
| 6  | -0.426179 | 1.159893  | 1.867142  |
| 8  | 0.096465  | 2.168099  | 2.569757  |
| 6  | 1.339719  | 1.775265  | 0.601797  |
| 6  | 1.332517  | 2.602298  | 1.912841  |
| 7  | 0.220283  | 0.815330  | 0.798224  |
| 6  | 1.235999  | 4.086756  | 1.531341  |
| 1  | 0.486414  | 4.595012  | 2.145304  |
| 1  | 2.194424  | 4.585227  | 1.717197  |
| 6  | 0.906060  | 4.067898  | 0.054998  |
| 6  | 0.561541  | 5.139554  | -0.766783 |
| 6  | 1.024572  | 2.781624  | -0.481328 |
| 6  | 0.339391  | 4.905481  | -2.125999 |
| 1  | 0.468283  | 6.142300  | -0.360376 |
| 6  | 0.822401  | 2.544919  | -1.840656 |
| 6  | 0.474613  | 3.620003  | -2.660299 |
| 1  | 0.067434  | 5.731909  | -2.775120 |
| 1  | 0.942293  | 1.547342  | -2.249033 |
| 1  | 0.310268  | 3.456841  | -3.720591 |
| 1  | 2.143553  | 2.365975  | 2.601332  |
| 1  | 2.256718  | 1.215376  | 0.432626  |
| 8  | -0.306159 | -1.412695 | -2.197404 |
| 1  | -0.446922 | -2.366347 | -2.111068 |
| 1  | 0.831449  | -1.200910 | -2.147882 |

**TS1B**

SCF Energy = -3351.100152

Gibbs Free Energy = -3350.328213

|    |           |           |           |                 |           |           |           |
|----|-----------|-----------|-----------|-----------------|-----------|-----------|-----------|
|    |           |           |           | 6               | -2.979136 | -0.564684 | -2.801961 |
|    |           |           |           | 6               | -4.060938 | -0.183606 | -0.672444 |
| 28 | -0.897250 | 0.456448  | 0.993503  | 6               | -4.042887 | -1.380422 | -3.191932 |
| 8  | 2.010888  | 2.562037  | 2.065329  | 1               | -2.151482 | -0.397275 | -3.482006 |
| 16 | 1.949379  | 2.235741  | 0.625003  | 6               | -5.132620 | -0.975955 | -1.074449 |
| 8  | 1.485885  | 3.325589  | -0.269168 | 1               | -4.052856 | 0.255379  | 0.319309  |
| 8  | 1.230961  | 0.931720  | 0.339760  | 6               | -5.121928 | -1.582888 | -2.331647 |
| 6  | 3.620878  | 1.835975  | 0.110613  | 1               | -4.030300 | -1.847964 | -4.172046 |
| 6  | 3.903253  | 1.722750  | -1.251753 | 1               | -5.959440 | -1.144698 | -0.394215 |
| 6  | 4.587484  | 1.527136  | 1.064653  | 1               | -5.949995 | -2.215716 | -2.636212 |
| 6  | 5.159576  | 1.278065  | -1.652735 | 6               | -2.213129 | 2.808790  | -1.386474 |
| 1  | 3.141232  | 1.979874  | -1.978279 | 6               | -1.410764 | 3.913604  | -1.057514 |
| 6  | 5.839597  | 1.073186  | 0.648217  | 6               | -3.460596 | 3.011892  | -1.995651 |
| 1  | 4.345052  | 1.644601  | 2.115182  | 6               | -1.858525 | 5.202517  | -1.344806 |
| 6  | 6.139833  | 0.928405  | -0.711283 | 1               | -0.435136 | 3.764277  | -0.603749 |
| 1  | 5.385453  | 1.193211  | -2.713240 | 6               | -3.902894 | 4.306435  | -2.267458 |
| 1  | 6.593931  | 0.824309  | 1.389968  | 1               | -4.085512 | 2.165900  | -2.256262 |
| 6  | 7.469327  | 0.373552  | -1.157173 | 6               | -3.103791 | 5.403362  | -1.943059 |
| 1  | 7.402070  | -0.709628 | -1.320225 | 1               | -1.228915 | 6.050289  | -1.092557 |
| 1  | 8.246834  | 0.543004  | -0.407194 | 1               | -4.871149 | 4.454914  | -2.736238 |
| 1  | 7.797983  | 0.825190  | -2.098112 | 1               | -3.450249 | 6.410289  | -2.156758 |
| 6  | -0.931532 | 1.228901  | 2.813006  | 6               | -0.099287 | -1.539626 | -1.138622 |
| 6  | -0.414880 | 0.078899  | 2.872379  | 8               | -0.047528 | -2.819110 | -1.565697 |
| 6  | 0.235942  | -0.992201 | 3.682483  | 6               | -0.918859 | -2.645917 | 0.628763  |
| 1  | -0.065634 | -0.858153 | 4.726493  | 6               | -0.644194 | -3.647623 | -0.529043 |
| 1  | -0.105459 | -1.982924 | 3.365688  | 7               | -0.539332 | -1.337481 | 0.055937  |
| 8  | 1.655103  | -0.942403 | 3.708005  | 6               | -2.007791 | -4.219829 | -0.978137 |
| 6  | 2.281524  | -1.098315 | 2.454747  | 1               | -2.246725 | -3.852856 | -1.982692 |
| 1  | 3.331056  | -0.812070 | 2.587831  | 1               | -1.993081 | -5.313523 | -1.025195 |
| 1  | 1.862424  | -0.411023 | 1.707563  | 6               | -2.989460 | -3.699145 | 0.048984  |
| 6  | 2.225311  | -2.516217 | 1.913714  | 6               | -4.336110 | -4.026104 | 0.196306  |
| 8  | 1.646698  | -3.411098 | 2.521090  | 6               | -2.388713 | -2.794086 | 0.927781  |
| 6  | 2.868912  | -2.789152 | 0.591143  | 6               | -5.069732 | -3.432669 | 1.226305  |
| 6  | 3.403329  | -1.774052 | -0.214823 | 1               | -4.810619 | -4.733990 | -0.477403 |
| 6  | 2.933330  | -4.123061 | 0.157247  | 6               | -3.117058 | -2.189891 | 1.950240  |
| 6  | 4.008648  | -2.098058 | -1.429617 | 6               | -4.467422 | -2.515058 | 2.093681  |
| 1  | 3.333851  | -0.735646 | 0.078879  | 1               | -6.118129 | -3.686063 | 1.354491  |
| 6  | 3.526141  | -4.440907 | -1.059219 | 1               | -2.640811 | -1.477503 | 2.615783  |
| 1  | 2.517092  | -4.889475 | 0.802641  | 1               | -5.050571 | -2.060499 | 2.888971  |
| 6  | 4.071459  | -3.425938 | -1.852972 | 1               | 0.089354  | -4.413298 | -0.279759 |
| 1  | 4.416629  | -1.301929 | -2.041823 | 1               | -0.304261 | -2.837973 | 1.506037  |
| 1  | 3.574509  | -5.474773 | -1.387969 | 6               | -1.332282 | 2.531585  | 3.423151  |
| 1  | 4.543127  | -3.672710 | -2.800019 | 6               | -0.340994 | 2.792991  | 4.576937  |
| 1  | -2.084596 | 1.108484  | 1.445267  | 1               | -0.593655 | 3.734880  | 5.075811  |
| 6  | -0.268192 | 0.755191  | -2.150853 | 1               | -0.381649 | 1.989963  | 5.319845  |
| 6  | 0.330583  | -0.523252 | -2.112908 | 1               | 0.674540  | 2.856636  | 4.180935  |
| 6  | 1.331796  | -0.856622 | -3.027897 | 6               | -1.254095 | 3.676233  | 2.401634  |
| 6  | 1.783090  | 0.089151  | -3.948168 | 1               | -1.957825 | 3.516712  | 1.580837  |
| 6  | 1.214907  | 1.360656  | -3.969607 | 1               | -1.509701 | 4.622388  | 2.890575  |
| 6  | 0.185286  | 1.687127  | -3.081670 | 1               | -0.247465 | 3.754845  | 1.988148  |
| 1  | 1.766599  | -1.847255 | -2.992696 | 6               | -2.772845 | 2.399867  | 3.955925  |
| 1  | 2.575780  | -0.169957 | -4.642892 | 1               | -3.469915 | 2.174327  | 3.141196  |
| 1  | 1.563490  | 2.103942  | -4.680014 | 1               | -2.846712 | 1.603088  | 4.702469  |
| 1  | -0.257632 | 2.675006  | -3.109725 | 1               | -3.087614 | 3.340335  | 4.420063  |
| 15 | -1.621629 | 1.131062  | -0.969589 |                 |           |           |           |
| 6  | -2.979099 | 0.036543  | -1.536884 | <b>TS1_iso1</b> |           |           |           |

|                                  |           |           |           |    |           |           |           |
|----------------------------------|-----------|-----------|-----------|----|-----------|-----------|-----------|
| SCF Energy = -4151.474674        |           |           |           | 28 | 0.845483  | -0.195173 | -0.234149 |
| Gibbs Free Energy = -4150.682896 |           |           |           | 8  | -1.068582 | -0.850145 | -1.446484 |
|                                  |           |           |           | 8  | 1.610392  | 1.350801  | -1.042794 |
| 6                                | 0.299918  | 0.325192  | 2.934496  | 16 | -2.041075 | -1.778185 | -2.132502 |
| 6                                | 0.669692  | -1.027062 | 3.099173  | 16 | 1.242142  | 1.776040  | -2.586794 |
| 6                                | 1.095850  | -1.483557 | 4.356193  | 8  | -2.656770 | -1.191819 | -3.343664 |
| 6                                | 1.166526  | -0.614728 | 5.441120  | 8  | -1.476879 | -3.142275 | -2.298682 |
| 6                                | 0.800828  | 0.721055  | 5.283206  | 8  | 1.372176  | 0.585445  | -3.427218 |
| 6                                | 0.371223  | 1.181940  | 4.038571  | 8  | 2.021979  | 2.977699  | -2.877984 |
| 1                                | 1.373924  | -2.524159 | 4.468026  | 6  | -0.457022 | 2.276837  | -2.464350 |
| 1                                | 1.507430  | -0.981206 | 6.403795  | 6  | -1.434455 | 1.544423  | -3.126966 |
| 1                                | 0.852068  | 1.406590  | 6.123203  | 6  | -0.758958 | 3.458168  | -1.779217 |
| 1                                | 0.093765  | 2.222677  | 3.915667  | 6  | -2.753261 | 1.999173  | -3.086109 |
| 15                               | -0.302297 | 0.956433  | 1.317703  | 1  | -1.192266 | 0.621180  | -3.632279 |
| 6                                | 0.072003  | 2.743211  | 1.405036  | 6  | -2.078570 | 3.889405  | -1.746674 |
| 6                                | -0.944517 | 3.700269  | 1.516293  | 1  | 0.024289  | 4.023090  | -1.288372 |
| 6                                | 1.411516  | 3.156152  | 1.322631  | 6  | -3.093052 | 3.169047  | -2.400078 |
| 6                                | -0.625765 | 5.058650  | 1.531466  | 1  | -3.516486 | 1.401745  | -3.572963 |
| 1                                | -1.980442 | 3.388110  | 1.570277  | 1  | -2.327165 | 4.797779  | -1.205366 |
| 6                                | 1.720883  | 4.514274  | 1.336437  | 6  | -3.381270 | -1.965153 | -0.944971 |
| 1                                | 2.198921  | 2.417351  | 1.240137  | 6  | -4.700642 | -1.925326 | -1.383142 |
| 6                                | 0.704356  | 5.468270  | 1.433035  | 6  | -3.099326 | -2.179272 | 0.406601  |
| 1                                | -1.419456 | 5.795168  | 1.612832  | 6  | -5.739182 | -2.092287 | -0.464291 |
| 1                                | 2.757893  | 4.826505  | 1.259956  | 1  | -4.897214 | -1.751078 | -2.435046 |
| 1                                | 0.949106  | 6.526114  | 1.432537  | 6  | -4.138226 | -2.348210 | 1.312024  |
| 6                                | -2.115863 | 0.876340  | 1.448338  | 1  | -2.072310 | -2.171413 | 0.750279  |
| 6                                | -2.845220 | 1.012516  | 0.259759  | 6  | -5.476279 | -2.302232 | 0.892180  |
| 6                                | -2.787455 | 0.782291  | 2.675468  | 1  | -6.770006 | -2.052729 | -0.807285 |
| 6                                | -4.236019 | 1.069212  | 0.302641  | 1  | -3.914358 | -2.491482 | 2.365932  |
| 1                                | -2.327255 | 1.033632  | -0.688498 | 14 | 3.317264  | 0.211828  | -0.737353 |
| 6                                | -4.180147 | 0.829609  | 2.708314  | 1  | 2.024477  | -0.843124 | -1.009277 |
| 1                                | -2.230201 | 0.674242  | 3.599518  | 8  | 3.289759  | 0.565083  | 0.905189  |
| 6                                | -4.904232 | 0.975699  | 1.522844  | 8  | 4.204550  | 1.353682  | -1.532780 |
| 1                                | -4.792191 | 1.145633  | -0.624246 | 6  | 3.927966  | -0.258924 | 1.880336  |
| 1                                | -4.699479 | 0.748667  | 3.658553  | 1  | 4.917342  | -0.572070 | 1.526081  |
| 1                                | -5.989239 | 0.998936  | 1.550141  | 1  | 3.331920  | -1.167825 | 2.038366  |
| 6                                | 0.619457  | -2.013694 | 2.005014  | 6  | 4.054575  | 0.520477  | 3.176943  |
| 8                                | 0.566399  | -3.299405 | 2.400378  | 1  | 3.073026  | 0.843154  | 3.528785  |
| 6                                | 0.492963  | -3.135094 | 0.036925  | 1  | 4.514183  | -0.101194 | 3.952085  |
| 6                                | 0.708229  | -4.123692 | 1.205358  | 1  | 4.677182  | 1.407846  | 3.029545  |
| 7                                | 0.624946  | -1.811304 | 0.728250  | 6  | 4.332904  | 2.737930  | -1.193940 |
| 6                                | 2.138229  | -4.690986 | 1.059130  | 1  | 4.510075  | 3.275551  | -2.127570 |
| 1                                | 2.809008  | -4.176948 | 1.759881  | 1  | 3.395758  | 3.119685  | -0.782292 |
| 1                                | 2.185318  | -5.758251 | 1.294690  | 6  | 5.480141  | 2.936118  | -0.212802 |
| 6                                | 2.485507  | -4.385569 | -0.382395 | 1  | 5.621431  | 4.002648  | -0.002780 |
| 6                                | 3.526855  | -4.902133 | -1.151142 | 1  | 5.271631  | 2.421715  | 0.729890  |
| 6                                | 1.572912  | -3.488031 | -0.947693 | 1  | 6.413918  | 2.540519  | -0.623531 |
| 6                                | 3.632280  | -4.509949 | -2.488605 | 6  | 4.402551  | -1.277920 | -1.107686 |
| 1                                | 4.236162  | -5.607076 | -0.726565 | 1  | 5.443418  | -1.038861 | -0.868737 |
| 6                                | 1.662510  | -3.103842 | -2.284233 | 1  | 4.084939  | -2.168368 | -0.562120 |
| 6                                | 2.707753  | -3.622680 | -3.050436 | 1  | 4.344151  | -1.508900 | -2.173308 |
| 1                                | 4.435201  | -4.908727 | -3.101533 | 6  | -4.522001 | 3.644891  | -2.329457 |
| 1                                | 0.920561  | -2.441418 | -2.711112 | 1  | -4.892659 | 3.610500  | -1.298289 |
| 1                                | 2.795781  | -3.339825 | -4.094522 | 1  | -4.614224 | 4.681045  | -2.672537 |
| 1                                | -0.054584 | -4.898584 | 1.268819  | 1  | -5.178848 | 3.024508  | -2.944334 |
| 1                                | -0.485027 | -3.177721 | -0.441961 | 6  | -6.592416 | -2.438636 | 1.896723  |

|                                  |           |           |           |                                  |           |           |           |
|----------------------------------|-----------|-----------|-----------|----------------------------------|-----------|-----------|-----------|
| 1                                | -6.593269 | -1.593467 | 2.596209  | 1                                | 3.512939  | 5.305269  | 1.804840  |
| 1                                | -7.570060 | -2.469667 | 1.408416  | 1                                | 0.398365  | 2.470156  | 0.950905  |
| 1                                | -6.485289 | -3.349848 | 2.495350  | 1                                | 1.574021  | 3.954639  | 2.543842  |
| <b>TS1_iso</b>                   |           |           |           | 1                                | 1.731323  | 2.478722  | -3.989652 |
| SCF Energy = -3256.452952        |           |           |           | 1                                | 0.095051  | 2.477563  | -2.133081 |
| Gibbs Free Energy = -3255.786054 |           |           |           | 28                               | -0.093466 | -0.051807 | -0.467205 |
| 6                                | 2.536058  | -1.834552 | -0.832537 | 8                                | -1.603388 | -0.831124 | 0.345175  |
| 6                                | 2.753552  | -1.084508 | -2.013082 | 16                               | -1.991612 | -0.228463 | 1.818306  |
| 6                                | 3.514366  | -1.618313 | -3.059917 | 8                                | -0.772397 | 0.455108  | 2.279626  |
| 6                                | 4.032151  | -2.908452 | -2.960945 | 8                                | -2.574223 | -1.315421 | 2.591179  |
| 6                                | 3.805878  | -3.658621 | -1.808702 | 6                                | -3.226764 | 0.999867  | 1.474567  |
| 6                                | 3.069941  | -3.121310 | -0.748391 | 6                                | -2.851290 | 2.210423  | 0.889261  |
| 1                                | 3.687002  | -1.020713 | -3.947474 | 6                                | -4.558958 | 0.717703  | 1.771622  |
| 1                                | 4.608948  | -3.322823 | -3.780694 | 6                                | -3.840660 | 3.136632  | 0.569098  |
| 1                                | 4.206152  | -4.663887 | -1.726196 | 1                                | -1.808682 | 2.429556  | 0.693694  |
| 1                                | 2.912082  | -3.708039 | 0.149005  | 6                                | -5.530110 | 1.663446  | 1.459227  |
| 15                               | 1.565976  | -1.117252 | 0.553763  | 1                                | -4.816621 | -0.230636 | 2.227678  |
| 6                                | 2.696510  | 0.011070  | 1.431042  | 6                                | -5.191164 | 2.879604  | 0.847152  |
| 6                                | 3.865821  | 0.505355  | 0.838956  | 1                                | -3.559822 | 4.080905  | 0.111931  |
| 6                                | 2.336840  | 0.429355  | 2.722864  | 1                                | -6.570622 | 1.454262  | 1.689285  |
| 6                                | 4.669473  | 1.408683  | 1.532938  | 14                               | -2.445643 | -0.462162 | -1.470134 |
| 1                                | 4.165387  | 0.180276  | -0.150833 | 1                                | -1.227368 | 0.716561  | -1.207255 |
| 6                                | 3.156508  | 1.316758  | 3.415114  | 8                                | -3.839946 | -0.939718 | -0.721466 |
| 1                                | 1.419867  | 0.069771  | 3.174248  | 8                                | -1.607943 | -1.692126 | -2.184208 |
| 6                                | 4.319799  | 1.810588  | 2.821687  | 6                                | -5.170408 | -0.787591 | -1.227237 |
| 1                                | 5.572253  | 1.790684  | 1.067795  | 1                                | -5.299359 | 0.206752  | -1.669466 |
| 1                                | 2.879990  | 1.628983  | 4.417139  | 1                                | -5.830794 | -0.841119 | -0.357359 |
| 1                                | 4.951378  | 2.508533  | 3.361905  | 6                                | -5.511978 | -1.880900 | -2.227394 |
| 6                                | 1.239269  | -2.487602 | 1.695544  | 1                                | -5.364736 | -2.866316 | -1.776366 |
| 6                                | 2.211713  | -2.872940 | 2.634427  | 1                                | -6.556650 | -1.798292 | -2.543379 |
| 6                                | 0.030251  | -3.192575 | 1.613423  | 1                                | -4.881024 | -1.814021 | -3.119639 |
| 6                                | 1.971706  | -3.956026 | 3.476198  | 6                                | -1.622431 | -3.065756 | -1.757365 |
| 1                                | 3.144243  | -2.324511 | 2.710076  | 1                                | -0.606803 | -3.320421 | -1.434253 |
| 6                                | -0.203884 | -4.270690 | 2.465634  | 1                                | -2.293351 | -3.182810 | -0.899791 |
| 1                                | -0.732706 | -2.882746 | 0.913902  | 6                                | -2.058307 | -3.951239 | -2.910014 |
| 6                                | 0.763900  | -4.654115 | 3.393654  | 1                                | -2.020455 | -5.004251 | -2.612948 |
| 1                                | 2.723698  | -4.250547 | 4.201125  | 1                                | -3.082200 | -3.714947 | -3.212474 |
| 1                                | -1.150030 | -4.798755 | 2.411924  | 1                                | -1.401947 | -3.809747 | -3.773148 |
| 1                                | 0.576459  | -5.490760 | 4.059137  | 6                                | -2.949293 | 0.749232  | -2.822620 |
| 6                                | 2.219923  | 0.274037  | -2.154191 | 1                                | -3.737010 | 0.341365  | -3.463385 |
| 8                                | 2.879394  | 1.112157  | -2.958042 | 1                                | -3.304826 | 1.689513  | -2.388413 |
| 6                                | 1.116744  | 2.215456  | -1.848776 | 1                                | -2.076557 | 0.965517  | -3.445503 |
| 6                                | 2.155027  | 2.391982  | -2.988023 | 6                                | -6.251871 | 3.901440  | 0.531192  |
| 7                                | 1.179332  | 0.766212  | -1.558046 | 1                                | -5.938976 | 4.568601  | -0.275912 |
| 6                                | 3.081905  | 3.549293  | -2.593875 | 1                                | -7.191651 | 3.424191  | 0.240548  |
| 1                                | 4.127068  | 3.293599  | -2.792483 | 1                                | -6.460800 | 4.522974  | 1.409888  |
| 1                                | 2.848794  | 4.433957  | -3.197868 | <b>TS1</b>                       |           |           |           |
| 6                                | 2.781277  | 3.777976  | -1.128470 | SCF Energy = -3256.469528        |           |           |           |
| 6                                | 3.451844  | 4.602442  | -0.226594 | Gibbs Free Energy = -3255.800943 |           |           |           |
| 6                                | 1.667393  | 3.044067  | -0.710646 | 6                                | -0.049169 | -2.840961 | -0.461780 |
| 6                                | 2.997929  | 4.669178  | 1.091918  | 6                                | 0.638432  | -2.623914 | -1.678229 |
| 1                                | 4.315513  | 5.181077  | -0.540427 | 6                                | 0.618414  | -3.601870 | -2.678791 |
| 6                                | 1.222475  | 3.088956  | 0.609181  | 6                                | -0.101029 | -4.781883 | -2.492231 |
| 6                                | 1.896758  | 3.913726  | 1.509346  | 6                                | -0.786353 | -4.995814 | -1.297628 |

|    |           |           |           |    |           |           |           |
|----|-----------|-----------|-----------|----|-----------|-----------|-----------|
| 6  | -0.755640 | -4.032073 | -0.286041 | 6  | -2.979997 | -1.559998 | -2.121317 |
| 1  | 1.160531  | -3.424596 | -3.600338 | 1  | -1.179359 | -0.706589 | -2.957733 |
| 1  | -0.122925 | -5.529442 | -3.277831 | 6  | -4.507146 | 0.015372  | -1.121422 |
| 1  | -1.345885 | -5.913149 | -1.146555 | 1  | -3.868358 | 2.086135  | -1.131501 |
| 1  | -1.292083 | -4.207443 | 0.639125  | 6  | -4.189948 | -1.309554 | -1.458472 |
| 15 | -0.047303 | -1.562862 | 0.850371  | 1  | -2.727730 | -2.574463 | -2.415452 |
| 6  | 1.504852  | -1.712970 | 1.779532  | 1  | -5.455809 | 0.228244  | -0.636954 |
| 6  | 2.641715  | -2.303775 | 1.213241  | 14 | -0.993191 | 2.406062  | 1.139394  |
| 6  | 1.589154  | -1.095965 | 3.038120  | 1  | -1.184519 | 0.762449  | 0.858931  |
| 6  | 3.851468  | -2.280830 | 1.904073  | 8  | -2.344261 | 3.111001  | 0.535109  |
| 1  | 2.587517  | -2.785343 | 0.243516  | 8  | 0.427945  | 3.223213  | 1.255780  |
| 6  | 2.799129  | -1.088907 | 3.727168  | 6  | -3.235701 | 3.954383  | 1.281692  |
| 1  | 0.711556  | -0.635530 | 3.480513  | 1  | -3.475660 | 3.491966  | 2.246993  |
| 6  | 3.931214  | -1.676326 | 3.158742  | 1  | -4.159039 | 4.004712  | 0.697472  |
| 1  | 4.731753  | -2.732395 | 1.459590  | 6  | -2.642953 | 5.341218  | 1.469638  |
| 1  | 2.859068  | -0.620017 | 4.703969  | 1  | -2.394509 | 5.777525  | 0.498563  |
| 1  | 4.875521  | -1.660646 | 3.692876  | 1  | -3.358429 | 5.997382  | 1.974906  |
| 6  | -1.414367 | -1.979739 | 1.964293  | 1  | -1.731433 | 5.300725  | 2.075524  |
| 6  | -1.242299 | -2.871616 | 3.033560  | 6  | 1.011165  | 4.132338  | 0.299082  |
| 6  | -2.680616 | -1.435908 | 1.701381  | 1  | 1.594584  | 3.551093  | -0.419995 |
| 6  | -2.332751 | -3.210671 | 3.834283  | 1  | 0.216636  | 4.642776  | -0.253029 |
| 1  | -0.263403 | -3.289394 | 3.243618  | 6  | 1.893201  | 5.109805  | 1.050460  |
| 6  | -3.766032 | -1.784546 | 2.502495  | 1  | 2.360010  | 5.807395  | 0.348341  |
| 1  | -2.820274 | -0.749140 | 0.874479  | 1  | 1.310237  | 5.685604  | 1.774690  |
| 6  | -3.592586 | -2.669187 | 3.569811  | 1  | 2.684826  | 4.578474  | 1.586975  |
| 1  | -2.197494 | -3.895194 | 4.665271  | 6  | -1.269937 | 1.949801  | 2.945598  |
| 1  | -4.743252 | -1.359817 | 2.296511  | 1  | -1.423215 | 2.846066  | 3.554836  |
| 1  | -4.437361 | -2.933615 | 4.197653  | 1  | -2.127999 | 1.282555  | 3.071810  |
| 6  | 1.386525  | -1.382734 | -1.919474 | 1  | -0.379196 | 1.441307  | 3.326806  |
| 8  | 2.386080  | -1.430577 | -2.799052 | 6  | -5.112093 | -2.442890 | -1.091559 |
| 6  | 2.250292  | 0.693925  | -1.766036 | 1  | -5.077152 | -3.243594 | -1.835068 |
| 6  | 2.952552  | -0.071729 | -2.917639 | 1  | -4.819121 | -2.876319 | -0.127238 |
| 7  | 1.176563  | -0.240924 | -1.352922 | 1  | -6.147337 | -2.104918 | -1.000248 |
| 6  | 4.454427  | -0.100328 | -2.606348 |    |           |           |           |
| 1  | 4.873456  | -1.092707 | -2.798065 |    |           |           |           |
| 1  | 4.982370  | 0.601806  | -3.261969 |    |           |           |           |
| 6  | 4.538468  | 0.331178  | -1.157701 |    |           |           |           |
| 6  | 5.649478  | 0.327921  | -0.315348 |    |           |           |           |
| 6  | 3.311210  | 0.817050  | -0.696231 | 28 | 1.085415  | 1.023196  | -0.027556 |
| 6  | 5.511244  | 0.813554  | 0.986791  | 8  | -2.400787 | 1.426708  | -2.385646 |
| 1  | 6.609337  | -0.040903 | -0.664785 | 16 | -1.609567 | 0.244506  | -1.953671 |
| 6  | 3.165378  | 1.300991  | 0.603005  | 8  | -0.584940 | -0.198754 | -2.928141 |
| 6  | 4.279768  | 1.296668  | 1.442708  | 8  | -1.072325 | 0.424254  | -0.550396 |
| 1  | 6.369549  | 0.817801  | 1.651445  | 6  | -2.750549 | -1.132776 | -1.777805 |
| 1  | 2.212638  | 1.677464  | 0.961002  | 6  | -3.393436 | -1.362737 | -0.562893 |
| 1  | 4.187253  | 1.666188  | 2.458588  | 6  | -2.991737 | -1.962997 | -2.871486 |
| 1  | 2.697315  | 0.276499  | -3.918244 | 6  | -4.289392 | -2.423263 | -0.449274 |
| 1  | 1.793080  | 1.632721  | -2.074402 | 1  | -3.182658 | -0.726440 | 0.286576  |
| 28 | -0.157905 | 0.337512  | -0.142824 | 6  | -3.886893 | -3.022842 | -2.745051 |
| 8  | -0.412635 | 2.077026  | -0.887798 | 1  | -2.457853 | -1.785386 | -3.798343 |
| 16 | -1.218762 | 2.079008  | -2.292961 | 6  | -4.552530 | -3.266563 | -1.535629 |
| 8  | -0.271984 | 1.608652  | -3.310692 | 1  | -4.791416 | -2.596354 | 0.498973  |
| 8  | -1.882440 | 3.365624  | -2.437738 | 1  | -4.069216 | -3.675548 | -3.595233 |
| 6  | -2.422212 | 0.780088  | -2.031508 | 6  | -5.545201 | -4.396678 | -1.415418 |
| 6  | -2.098942 | -0.523431 | -2.417713 | 1  | -6.543543 | -4.081545 | -1.743502 |
| 6  | -3.632900 | 1.064807  | -1.400150 | 1  | -5.257166 | -5.251383 | -2.035220 |

**TS2B**

SCF Energy = -3351.096942

Gibbs Free Energy = -3350.325164

|    |           |           |           |    |           |           |           |
|----|-----------|-----------|-----------|----|-----------|-----------|-----------|
| 1  | -5.636986 | -4.740578 | -0.380959 | 1  | 4.488955  | -4.235504 | 1.805765  |
| 6  | 0.886435  | 2.829650  | -0.800703 | 1  | 5.327182  | -0.319398 | 3.372189  |
| 6  | 0.543957  | 2.835505  | 0.420232  | 1  | 6.021250  | -2.674193 | 2.985176  |
| 6  | -0.199642 | 3.427932  | 1.570478  | 6  | -0.169264 | -0.846174 | 2.637715  |
| 1  | 0.443080  | 4.119947  | 2.125354  | 6  | -1.348768 | -0.087277 | 2.593703  |
| 1  | -0.526753 | 2.647128  | 2.264021  | 6  | 0.127683  | -1.612546 | 3.772847  |
| 8  | -1.300773 | 4.202923  | 1.115658  | 6  | -2.220917 | -0.093464 | 3.680337  |
| 6  | -2.346889 | 3.429905  | 0.560132  | 1  | -1.572640 | 0.489330  | 1.703464  |
| 1  | -2.955645 | 4.108401  | -0.046489 | 6  | -0.752043 | -1.617880 | 4.855425  |
| 1  | -1.967098 | 2.652935  | -0.116101 | 1  | 1.041439  | -2.196372 | 3.809934  |
| 6  | -3.231918 | 2.782645  | 1.621285  | 6  | -1.922733 | -0.858425 | 4.809994  |
| 8  | -2.967692 | 2.884063  | 2.812351  | 1  | -3.112119 | 0.521226  | 3.646176  |
| 6  | -4.418016 | 2.004231  | 1.154524  | 1  | -0.519152 | -2.209904 | 5.735556  |
| 6  | -4.646105 | 1.728101  | -0.201596 | 1  | -2.599748 | -0.856209 | 5.659099  |
| 6  | -5.315815 | 1.520208  | 2.120116  | 6  | 1.959759  | -1.368407 | -1.649127 |
| 6  | -5.750502 | 0.964205  | -0.578294 | 8  | 2.900158  | -1.941471 | -2.435244 |
| 1  | -3.946599 | 2.042702  | -0.967606 | 6  | 3.439717  | 0.295244  | -1.882077 |
| 6  | -6.416953 | 0.761808  | 1.738982  | 6  | 4.001113  | -0.999760 | -2.537104 |
| 1  | -5.131062 | 1.762185  | 3.161393  | 7  | 2.148177  | -0.139581 | -1.316429 |
| 6  | -6.634317 | 0.480704  | 0.385681  | 6  | 5.211878  | -1.453530 | -1.686921 |
| 1  | -5.899671 | 0.729070  | -1.626945 | 1  | 4.950693  | -2.366502 | -1.139822 |
| 1  | -7.107826 | 0.390634  | 2.490333  | 1  | 6.083216  | -1.684638 | -2.308097 |
| 1  | -7.489253 | -0.119004 | 0.086845  | 6  | 5.461432  | -0.297645 | -0.743597 |
| 1  | 1.631405  | 1.580810  | 1.166197  | 6  | 6.520415  | -0.123664 | 0.145331  |
| 6  | 0.930142  | 3.604515  | -2.084651 | 6  | 4.462351  | 0.674441  | -0.840938 |
| 6  | -0.434145 | 4.322849  | -2.213483 | 6  | 6.559573  | 1.027032  | 0.936190  |
| 1  | -0.416133 | 4.982294  | -3.088665 | 1  | 7.304233  | -0.871372 | 0.225605  |
| 1  | -0.642869 | 4.921658  | -1.323254 | 6  | 4.491437  | 1.821301  | -0.050763 |
| 1  | -1.232633 | 3.588596  | -2.345869 | 6  | 5.549991  | 1.991003  | 0.844166  |
| 6  | 1.144781  | 2.723836  | -3.326069 | 1  | 7.382816  | 1.174859  | 1.629109  |
| 1  | 2.178837  | 2.373548  | -3.386134 | 1  | 3.702392  | 2.561465  | -0.129261 |
| 1  | 0.955747  | 3.317006  | -4.226882 | 1  | 5.594705  | 2.881072  | 1.464535  |
| 1  | 0.482339  | 1.856715  | -3.331160 | 1  | 4.236610  | -0.897273 | -3.596449 |
| 6  | 2.063701  | 4.646382  | -1.979260 | 1  | 3.248306  | 1.102117  | -2.589589 |
| 1  | 3.035628  | 4.159304  | -1.845797 |    |           |           |           |
| 1  | 1.898298  | 5.322106  | -1.134997 |    |           |           |           |
| 1  | 2.108063  | 5.243002  | -2.897080 |    |           |           |           |
| 6  | 0.313477  | -2.114781 | 0.078393  |    |           |           |           |
| 6  | 0.868641  | -2.249655 | -1.210842 |    |           |           |           |
| 6  | 0.418815  | -3.258045 | -2.066295 | 28 | 0.278183  | -0.193765 | -0.723349 |
| 6  | -0.599583 | -4.117791 | -1.661117 | 6  | 0.344982  | -2.867425 | -1.776427 |
| 6  | -1.151334 | -3.989078 | -0.388965 | 6  | -1.680015 | -2.419425 | -2.846404 |
| 6  | -0.692039 | -2.996018 | 0.477373  | 6  | -2.201126 | -1.426839 | -1.790992 |
| 1  | 0.854077  | -3.341651 | -3.054993 | 6  | -1.187475 | -2.068140 | 0.027966  |
| 1  | -0.968009 | -4.877513 | -2.341959 | 8  | -0.794530 | -3.431197 | -2.398816 |
| 1  | -1.956960 | -4.643570 | -0.074786 | 1  | -1.173940 | -1.797552 | -3.604616 |
| 1  | -1.131132 | -2.894865 | 1.462796  | 1  | -2.508902 | -2.944633 | -3.324687 |
| 15 | 0.930564  | -0.792771 | 1.189800  | 8  | -1.602603 | -0.276824 | -1.729608 |
| 6  | 2.542890  | -1.439631 | 1.765744  | 6  | -3.642904 | -1.496984 | -1.434185 |
| 6  | 2.937924  | -2.766437 | 1.548389  | 6  | -4.362273 | -2.705481 | -1.477611 |
| 6  | 3.417126  | -0.562519 | 2.423986  | 6  | -4.313574 | -0.336494 | -1.020878 |
| 6  | 4.189788  | -3.206658 | 1.982810  | 6  | -5.699235 | -2.750914 | -1.095931 |
| 1  | 2.270635  | -3.453230 | 1.039681  | 1  | -3.853041 | -3.621199 | -1.760938 |
| 6  | 4.656333  | -1.009647 | 2.872723  | 6  | -5.649746 | -0.384325 | -0.631649 |
| 1  | 3.132790  | 0.475024  | 2.563992  | 1  | -3.766895 | 0.596673  | -1.006732 |
| 6  | 5.047704  | -2.331176 | 2.648148  | 6  | -6.349998 | -1.591109 | -0.662043 |

**TS2C**

SCF Energy = -2529.40065

Gibbs Free Energy = -2528.785810

|    |           |           |           |    |           |           |           |
|----|-----------|-----------|-----------|----|-----------|-----------|-----------|
| 1  | -6.234399 | -3.696025 | -1.124219 | 1  | 0.880810  | -2.223613 | -2.495008 |
| 1  | -6.145258 | 0.525219  | -0.303215 | 1  | 1.012910  | -3.701109 | -1.533762 |
| 1  | -7.391329 | -1.630323 | -0.356159 | 6  | -0.003723 | -2.094373 | -0.525904 |
| 6  | 3.201500  | 1.104074  | 0.001900  | 6  | -1.852037 | -1.566984 | 1.220357  |
| 6  | 2.715884  | 2.320669  | -0.532654 | 6  | -3.075619 | -2.146443 | 1.610951  |
| 6  | 3.580278  | 3.431736  | -0.596418 | 6  | -1.311508 | -0.565811 | 2.054405  |
| 6  | 4.890109  | 3.352623  | -0.141172 | 6  | -3.732889 | -1.735906 | 2.767136  |
| 6  | 5.372249  | 2.152195  | 0.381068  | 1  | -3.509739 | -2.917544 | 0.987416  |
| 6  | 4.530949  | 1.045731  | 0.442586  | 6  | -1.959911 | -0.165732 | 3.219131  |
| 1  | 3.205735  | 4.359106  | -1.009026 | 1  | -0.379760 | -0.094453 | 1.771217  |
| 1  | 5.533393  | 4.224844  | -0.199734 | 6  | -3.178566 | -0.744667 | 3.580182  |
| 1  | 6.396324  | 2.075896  | 0.733222  | 1  | -4.681349 | -2.192821 | 3.033823  |
| 1  | 4.909305  | 0.108657  | 0.837292  | 1  | -1.512888 | 0.607094  | 3.837736  |
| 15 | 2.180239  | -0.430645 | 0.132474  | 1  | -3.689326 | -0.428092 | 4.485183  |
| 6  | 2.113929  | -0.741375 | 1.936468  |    |           |           |           |
| 6  | 1.621808  | -1.977471 | 2.388908  |    |           |           |           |
| 6  | 2.372692  | 0.273047  | 2.867891  |    |           |           |           |
| 6  | 1.415858  | -2.196231 | 3.747731  |    |           |           |           |
| 1  | 1.355481  | -2.741405 | 1.666502  |    |           |           |           |
| 6  | 2.147350  | 0.053649  | 4.228073  | 28 | 0.071880  | -0.280402 | -1.100650 |
| 1  | 2.739639  | 1.237429  | 2.535314  | 6  | -4.562770 | 1.518082  | -1.276880 |
| 6  | 1.673048  | -1.180344 | 4.671140  | 6  | -3.259192 | 1.105369  | -1.536638 |
| 1  | 1.026549  | -3.152480 | 4.082744  | 6  | -2.992909 | -0.242660 | -1.824743 |
| 1  | 2.343119  | 0.850737  | 4.939149  | 6  | -4.050708 | -1.167849 | -1.870106 |
| 1  | 1.492941  | -1.347344 | 5.728712  | 6  | -5.350709 | -0.745957 | -1.615778 |
| 6  | 3.358239  | -1.663290 | -0.544116 | 6  | -5.608926 | 0.593806  | -1.313459 |
| 6  | 3.544843  | -1.671073 | -1.935292 | 1  | -4.761866 | 2.560017  | -1.048056 |
| 6  | 4.062099  | -2.581444 | 0.244298  | 1  | -2.443609 | 1.817408  | -1.522521 |
| 6  | 4.415539  | -2.582059 | -2.526516 | 1  | -3.836360 | -2.211352 | -2.069389 |
| 1  | 2.996290  | -0.964848 | -2.552673 | 1  | -6.162463 | -1.465398 | -1.639103 |
| 6  | 4.927660  | -3.500352 | -0.352326 | 1  | -6.624680 | 0.916478  | -1.108132 |
| 1  | 3.931094  | -2.584385 | 1.320477  | 6  | -1.651031 | -0.699436 | -2.071658 |
| 6  | 5.106136  | -3.504097 | -1.735528 | 6  | -0.739691 | -1.406564 | -2.555958 |
| 1  | 4.548521  | -2.579903 | -3.604153 | 6  | -0.189907 | -2.399471 | -3.510064 |
| 1  | 5.463702  | -4.212613 | 0.267982  | 1  | -1.037824 | -2.845482 | -4.039141 |
| 1  | 5.777494  | -4.221944 | -2.196700 | 1  | 0.448886  | -1.888249 | -4.245707 |
| 6  | 1.347731  | 2.524164  | -1.047698 | 8  | 0.501849  | -3.479471 | -2.913347 |
| 8  | 1.116858  | 3.759759  | -1.557061 | 6  | 1.825898  | -3.202828 | -2.532553 |
| 6  | -0.829235 | 2.458423  | -1.577340 | 1  | 2.287376  | -2.474815 | -3.212023 |
| 6  | -0.219423 | 3.763189  | -2.140282 | 1  | 2.396768  | -4.135888 | -2.631677 |
| 7  | 0.347775  | 1.706024  | -1.077888 | 6  | 1.978039  | -2.757471 | -1.078154 |
| 6  | -1.034955 | 4.940358  | -1.588263 | 8  | 1.070314  | -2.903757 | -0.271587 |
| 1  | -0.379684 | 5.768048  | -1.299231 | 6  | 3.304896  | -2.224563 | -0.654644 |
| 1  | -1.712028 | 5.319971  | -2.363697 | 6  | 4.167841  | -1.547429 | -1.530835 |
| 6  | -1.802140 | 4.334717  | -0.434005 | 6  | 3.676797  | -2.383739 | 0.688565  |
| 6  | -2.552891 | 4.979566  | 0.547409  | 6  | 5.370990  | -1.019703 | -1.063060 |
| 6  | -1.710546 | 2.939090  | -0.444589 | 1  | 3.900838  | -1.407281 | -2.572237 |
| 6  | -3.202864 | 4.210128  | 1.516937  | 6  | 4.888459  | -1.876930 | 1.147479  |
| 1  | -2.629964 | 6.063388  | 0.563621  | 1  | 2.999684  | -2.905634 | 1.354696  |
| 6  | -2.355873 | 2.168874  | 0.517626  | 6  | 5.734119  | -1.186514 | 0.275224  |
| 6  | -3.104161 | 2.814726  | 1.503423  | 1  | 6.029705  | -0.490570 | -1.744557 |
| 1  | -3.787570 | 4.702189  | 2.288839  | 1  | 5.175810  | -2.018601 | 2.184346  |
| 1  | -2.268879 | 1.091946  | 0.502918  | 1  | 6.677789  | -0.788371 | 0.634771  |
| 1  | -3.601676 | 2.220618  | 2.263344  | 1  | 0.909181  | -0.427066 | -2.292553 |
| 1  | -0.091382 | 3.783425  | -3.225554 | 6  | 0.230190  | -0.794227 | 2.114979  |
| 1  | -1.361417 | 1.833038  | -2.293813 | 6  | 1.543845  | -0.281417 | 2.079996  |

**TS2D**

SCF Energy = -2529.874044

Gibbs Free Energy = -2529.247947

|    |           |           |           |    |           |           |           |
|----|-----------|-----------|-----------|----|-----------|-----------|-----------|
| 6  | 2.428365  | -0.548272 | 3.133506  | 28 | -0.308597 | 0.376454  | 1.057485  |
| 6  | 2.036436  | -1.363548 | 4.192173  | 8  | -0.399382 | -2.254101 | -1.707688 |
| 6  | 0.752715  | -1.906451 | 4.207889  | 16 | 0.582002  | -2.379773 | -0.606281 |
| 6  | -0.148540 | -1.608950 | 3.182741  | 8  | 0.330458  | -3.478865 | 0.359998  |
| 1  | 3.426974  | -0.131504 | 3.099077  | 8  | 0.845154  | -1.063717 | 0.102260  |
| 1  | 2.731591  | -1.575319 | 4.997584  | 6  | 2.201892  | -2.635481 | -1.326296 |
| 1  | 0.443083  | -2.552025 | 5.023494  | 6  | 2.500826  | -2.021297 | -2.541541 |
| 1  | -1.152501 | -2.015820 | 3.214354  | 6  | 3.200123  | -3.252472 | -0.574490 |
| 15 | -0.996920 | -0.231551 | 0.865636  | 6  | 3.817584  | -2.008206 | -2.992663 |
| 6  | -1.453011 | 1.395398  | 1.557647  | 1  | 1.709472  | -1.549620 | -3.110820 |
| 6  | -1.956911 | 1.508541  | 2.863657  | 6  | 4.513590  | -3.234389 | -1.040171 |
| 6  | -1.216740 | 2.553953  | 0.806970  | 1  | 2.942168  | -3.732250 | 0.362178  |
| 6  | -2.254686 | 2.762336  | 3.391466  | 6  | 4.845185  | -2.598756 | -2.244463 |
| 1  | -2.110257 | 0.620298  | 3.467769  | 1  | 4.053726  | -1.520379 | -3.934725 |
| 6  | -1.507224 | 3.808995  | 1.343098  | 1  | 5.295451  | -3.714570 | -0.457437 |
| 1  | -0.794100 | 2.481611  | -0.186991 | 6  | 6.278335  | -2.521310 | -2.708705 |
| 6  | -2.033400 | 3.913731  | 2.630284  | 1  | 6.348894  | -2.557824 | -3.799872 |
| 1  | -2.651712 | 2.842702  | 4.398369  | 1  | 6.877144  | -3.340437 | -2.300655 |
| 1  | -1.315613 | 4.696848  | 0.750614  | 1  | 6.742744  | -1.581663 | -2.384000 |
| 1  | -2.263079 | 4.889587  | 3.046469  | 6  | 4.091565  | 0.198554  | 3.803472  |
| 6  | -2.398964 | -1.369451 | 1.063948  | 6  | 2.757164  | 0.502540  | 3.554035  |
| 6  | -2.188603 | -2.704866 | 0.675476  | 6  | 1.903098  | -0.473249 | 3.014452  |
| 6  | -3.662000 | -0.957310 | 1.502018  | 6  | 2.407776  | -1.749828 | 2.707436  |
| 6  | -3.238171 | -3.617464 | 0.751358  | 6  | 3.744441  | -2.041347 | 2.964107  |
| 1  | -1.214509 | -3.020396 | 0.313059  | 6  | 4.588403  | -1.073325 | 3.512210  |
| 6  | -4.706816 | -1.879202 | 1.570574  | 1  | 4.748488  | 0.960491  | 4.210352  |
| 1  | -3.839724 | 0.078499  | 1.764628  | 1  | 2.368484  | 1.493512  | 3.762996  |
| 6  | -4.496673 | -3.207336 | 1.200720  | 1  | 1.745729  | -2.485508 | 2.265500  |
| 1  | -3.073687 | -4.649111 | 0.456491  | 1  | 4.130336  | -3.029187 | 2.729946  |
| 1  | -5.686378 | -1.554462 | 1.906326  | 1  | 5.631909  | -1.305303 | 3.703204  |
| 1  | -5.312042 | -3.921768 | 1.256290  | 6  | 0.523034  | -0.180977 | 2.740378  |
| 6  | 2.033879  | 0.519112  | 0.952699  | 6  | -0.736319 | -0.204269 | 2.895694  |
| 8  | 3.094405  | 1.300237  | 1.196987  | 6  | -1.904797 | -0.670860 | 3.706148  |
| 6  | 2.390630  | 1.495038  | -1.052901 | 1  | -1.780778 | -0.335476 | 4.740537  |
| 6  | 3.400175  | 2.055110  | -0.013372 | 1  | -2.840531 | -0.256918 | 3.320210  |
| 7  | 1.582392  | 0.536941  | -0.261619 | 8  | -1.974262 | -2.089353 | 3.780294  |
| 6  | 3.088578  | 3.554780  | 0.178832  | 6  | -2.182647 | -2.732760 | 2.541373  |
| 1  | 2.849867  | 3.756256  | 1.228009  | 1  | -2.058680 | -3.806532 | 2.721390  |
| 1  | 3.956753  | 4.171577  | -0.076222 | 1  | -1.411844 | -2.459540 | 1.809919  |
| 6  | 1.923905  | 3.822547  | -0.749567 | 6  | -3.578048 | -2.492277 | 1.965185  |
| 6  | 1.225707  | 5.015730  | -0.935547 | 8  | -4.410637 | -1.849581 | 2.591074  |
| 6  | 1.575717  | 2.688099  | -1.486729 | 6  | -3.884539 | -3.022929 | 0.602109  |
| 6  | 0.179215  | 5.052618  | -1.860745 | 6  | -2.909688 | -3.616266 | -0.211662 |
| 1  | 1.489249  | 5.905508  | -0.371533 | 6  | -5.190365 | -2.849743 | 0.111412  |
| 6  | 0.544409  | 2.721942  | -2.425061 | 6  | -3.239027 | -4.020852 | -1.506729 |
| 6  | -0.159153 | 3.915116  | -2.604201 | 1  | -1.887165 | -3.739062 | 0.126070  |
| 1  | -0.370084 | 5.976394  | -2.013443 | 6  | -5.517906 | -3.270214 | -1.172230 |
| 1  | 0.285244  | 1.834057  | -2.993134 | 1  | -5.921480 | -2.376310 | 0.757892  |
| 1  | -0.966178 | 3.963495  | -3.328309 | 6  | -4.538271 | -3.855484 | -1.985513 |
| 1  | 4.443448  | 1.846410  | -0.247093 | 1  | -2.464457 | -4.439051 | -2.139838 |
| 1  | 2.851850  | 0.947648  | -1.877859 | 1  | -6.529895 | -3.141936 | -1.545331 |
|    |           |           |           | 1  | -4.789979 | -4.171728 | -2.993770 |
|    |           |           |           | 1  | -1.194439 | 1.093126  | 1.925392  |
|    |           |           |           | 6  | 1.101314  | 1.363178  | -1.801887 |
|    |           |           |           | 6  | -0.055185 | 0.819611  | -2.408174 |
|    |           |           |           | 6  | -0.037333 | 0.515528  | -3.779982 |

**TS2\_iso**

SCF Energy = -3424.889474

Gibbs Free Energy = -3424.149528



|    |           |           |           |    |           |           |           |
|----|-----------|-----------|-----------|----|-----------|-----------|-----------|
| 6  | 1.094568  | 0.745652  | -4.554253 | 8  | -2.058993 | 2.693855  | -0.928384 |
| 6  | 2.234923  | 1.282732  | -3.960822 | 16 | -1.474712 | 1.365158  | -1.255975 |
| 6  | 2.230609  | 1.581495  | -2.599960 | 8  | -0.431240 | 1.431613  | -2.306713 |
| 1  | -0.921618 | 0.079018  | -4.224305 | 8  | -1.058118 | 0.623234  | -0.007667 |
| 1  | 1.085485  | 0.497109  | -5.610627 | 6  | -2.780226 | 0.327934  | -1.924940 |
| 1  | 3.129836  | 1.462557  | -4.548983 | 6  | -3.512840 | -0.509558 | -1.086283 |
| 1  | 3.130847  | 1.973743  | -2.142181 | 6  | -3.048852 | 0.366896  | -3.292263 |
| 15 | 1.147638  | 1.819832  | -0.008648 | 6  | -4.525019 | -1.302248 | -1.620253 |
| 6  | 0.680227  | 3.592243  | -0.098262 | 1  | -3.285637 | -0.544630 | -0.029396 |
| 6  | 1.381954  | 4.536364  | -0.863870 | 6  | -4.063490 | -0.431680 | -3.815725 |
| 6  | -0.487293 | 3.986011  | 0.567606  | 1  | -2.445709 | 1.000518  | -3.933012 |
| 6  | 0.929250  | 5.851073  | -0.945256 | 6  | -4.819355 | -1.273739 | -2.988872 |
| 1  | 2.278536  | 4.240942  | -1.398972 | 1  | -5.097598 | -1.948725 | -0.960814 |
| 6  | -0.949739 | 5.299275  | 0.472785  | 1  | -4.269461 | -0.407024 | -4.882979 |
| 1  | -1.040448 | 3.251095  | 1.140483  | 6  | -5.941157 | -2.109716 | -3.553948 |
| 6  | -0.239172 | 6.233842  | -0.279156 | 1  | -5.762736 | -2.365553 | -4.602625 |
| 1  | 1.480660  | 6.576475  | -1.536154 | 1  | -6.069456 | -3.040104 | -2.992394 |
| 1  | -1.867924 | 5.582996  | 0.978011  | 1  | -6.895562 | -1.570294 | -3.508937 |
| 1  | -0.595197 | 7.257027  | -0.354353 | 6  | 1.160059  | 2.464045  | 1.344271  |
| 6  | 2.937909  | 1.768027  | 0.354242  | 6  | 0.534217  | 1.850213  | 2.232841  |
| 6  | 3.601458  | 0.540773  | 0.169180  | 6  | -0.373454 | 1.716346  | 3.406079  |
| 6  | 3.640099  | 2.853640  | 0.891767  | 1  | 0.210005  | 1.814286  | 4.328045  |
| 6  | 4.951729  | 0.423357  | 0.478374  | 1  | -0.846406 | 0.732330  | 3.414591  |
| 1  | 3.053127  | -0.314440 | -0.204283 | 8  | -1.339410 | 2.753666  | 3.441154  |
| 6  | 4.994030  | 2.724205  | 1.211069  | 6  | -2.329279 | 2.659102  | 2.433603  |
| 1  | 3.136817  | 3.800720  | 1.054532  | 1  | -2.844781 | 3.625255  | 2.416625  |
| 6  | 5.653794  | 1.514894  | 0.996830  | 1  | -1.894092 | 2.510427  | 1.436525  |
| 1  | 5.445140  | -0.531779 | 0.330284  | 6  | -3.352089 | 1.557183  | 2.703778  |
| 1  | 5.531273  | 3.573803  | 1.622673  | 8  | -3.223485 | 0.806157  | 3.663729  |
| 1  | 6.707173  | 1.418869  | 1.243199  | 6  | -4.498691 | 1.406589  | 1.759317  |
| 6  | -1.315153 | 0.531393  | -1.697251 | 6  | -4.634210 | 2.194121  | 0.607051  |
| 8  | -2.364260 | 0.258237  | -2.494552 | 6  | -5.458629 | 0.419398  | 2.036439  |
| 6  | -2.997616 | 0.234880  | -0.242739 | 6  | -5.707029 | 1.983895  | -0.258083 |
| 6  | -3.468767 | -0.190567 | -1.653549 | 1  | -3.877739 | 2.918795  | 0.337563  |
| 7  | -1.559180 | 0.512772  | -0.427972 | 6  | -6.528259 | 0.214922  | 1.172684  |
| 6  | -4.736971 | 0.604452  | -1.979643 | 1  | -5.345406 | -0.170028 | 2.939554  |
| 1  | -4.719603 | 0.969528  | -3.010971 | 6  | -6.652351 | 0.998219  | 0.020284  |
| 1  | -5.611941 | -0.048391 | -1.877200 | 1  | -5.785443 | 2.576942  | -1.163359 |
| 6  | -4.758181 | 1.705079  | -0.941862 | 1  | -7.265629 | -0.551685 | 1.392385  |
| 6  | -5.594731 | 2.818181  | -0.876537 | 1  | -7.480753 | 0.831715  | -0.662149 |
| 6  | -3.813972 | 1.472812  | 0.064603  | 1  | 1.363566  | -0.021260 | 2.251823  |
| 6  | -5.481964 | 3.690662  | 0.208183  | 6  | 0.027001  | -1.975039 | -0.951068 |
| 1  | -6.326506 | 3.005823  | -1.657344 | 6  | 0.603832  | -1.327433 | -2.061800 |
| 6  | -3.717583 | 2.327379  | 1.160887  | 6  | 0.101424  | -1.567389 | -3.344026 |
| 6  | -4.553975 | 3.443395  | 1.225306  | 6  | -0.981101 | -2.423972 | -3.528794 |
| 1  | -6.126490 | 4.562589  | 0.267493  | 6  | -1.556465 | -3.061316 | -2.432855 |
| 1  | -3.002710 | 2.129485  | 1.952508  | 6  | -1.048593 | -2.841753 | -1.151443 |
| 1  | -4.488445 | 4.118699  | 2.073180  | 1  | 0.542723  | -1.045199 | -4.183623 |
| 1  | -3.557970 | -1.266080 | -1.795463 | 1  | -1.385210 | -2.575732 | -4.523831 |
| 1  | -3.117373 | -0.541999 | 0.507610  | 1  | -2.414447 | -3.711521 | -2.566352 |
|    |           |           |           | 1  | -1.505604 | -3.331246 | -0.299456 |
|    |           |           |           | 15 | 0.706869  | -1.676529 | 0.724465  |
|    |           |           |           | 6  | 2.209681  | -2.716030 | 0.741218  |
|    |           |           |           | 6  | 2.296401  | -3.886691 | -0.027471 |
|    |           |           |           | 6  | 3.312175  | -2.309872 | 1.503576  |
| 28 | 1.069650  | 0.444161  | 0.932543  | 6  | 3.467590  | -4.642905 | -0.021816 |

**TS2**

SCF Energy = -3424.896778

Gibbs Free Energy = -3424.156720

|                                  |           |           |           |    |           |           |           |
|----------------------------------|-----------|-----------|-----------|----|-----------|-----------|-----------|
| 1                                | 1.453759  | -4.196931 | -0.636575 | 16 | 1.407562  | 1.544692  | 1.106832  |
| 6                                | 4.483370  | -3.065551 | 1.502925  | 8  | 0.343468  | 1.502784  | 2.142028  |
| 1                                | 3.259016  | -1.388337 | 2.070706  | 8  | 1.152892  | 0.630689  | -0.068869 |
| 6                                | 4.562204  | -4.232289 | 0.741947  | 6  | 2.860888  | 0.819026  | 1.873824  |
| 1                                | 3.527844  | -5.547302 | -0.619779 | 6  | 3.762174  | 0.081090  | 1.108481  |
| 1                                | 5.337997  | -2.727666 | 2.078461  | 6  | 3.076819  | 0.999483  | 3.238803  |
| 1                                | 5.477668  | -4.816369 | 0.735872  | 6  | 4.887138  | -0.471046 | 1.714800  |
| 6                                | -0.490797 | -2.453890 | 1.852207  | 1  | 3.576703  | -0.066259 | 0.052785  |
| 6                                | -1.611149 | -1.694283 | 2.223396  | 6  | 4.205675  | 0.441111  | 3.835105  |
| 6                                | -0.325752 | -3.749278 | 2.357761  | 1  | 2.347176  | 1.549730  | 3.822333  |
| 6                                | -2.554858 | -2.226027 | 3.098924  | 6  | 5.128898  | -0.298101 | 3.083443  |
| 1                                | -1.732215 | -0.694775 | 1.821535  | 1  | 5.589469  | -1.041251 | 1.112820  |
| 6                                | -1.279196 | -4.279593 | 3.228536  | 1  | 4.370962  | 0.574398  | 4.901423  |
| 1                                | 0.543042  | -4.336042 | 2.078900  | 6  | 6.367484  | -0.871855 | 3.726625  |
| 6                                | -2.389526 | -3.519658 | 3.600041  | 1  | 7.204538  | -0.164695 | 3.670598  |
| 1                                | -3.391156 | -1.608279 | 3.404823  | 1  | 6.203443  | -1.095990 | 4.784923  |
| 1                                | -1.148076 | -5.283040 | 3.622612  | 1  | 6.687988  | -1.791841 | 3.228344  |
| 1                                | -3.121453 | -3.931730 | 4.288464  | 6  | -1.397979 | 1.912231  | -1.464735 |
| 6                                | 1.717723  | -0.378156 | -1.911508 | 6  | -0.686922 | 1.372678  | -2.340406 |
| 8                                | 2.530941  | -0.266544 | -2.983363 | 6  | 0.218109  | 1.329083  | -3.522025 |
| 6                                | 3.237186  | 1.099514  | -1.188252 | 1  | -0.383810 | 1.254639  | -4.434637 |
| 6                                | 3.596335  | 0.658323  | -2.635162 | 1  | 0.862638  | 0.448998  | -3.477224 |
| 7                                | 2.010061  | 0.338480  | -0.882556 | 8  | 0.980399  | 2.517792  | -3.654507 |
| 6                                | 4.962129  | -0.061440 | -2.579887 | 6  | 1.983513  | 2.676847  | -2.668379 |
| 1                                | 4.858720  | -1.084965 | -2.955239 | 1  | 2.321254  | 3.716375  | -2.737632 |
| 1                                | 5.699373  | 0.441419  | -3.215678 | 1  | 1.593002  | 2.534114  | -1.652135 |
| 6                                | 5.359926  | -0.013493 | -1.120215 | 6  | 3.181194  | 1.752399  | -2.877882 |
| 6                                | 6.512988  | -0.522785 | -0.524026 | 8  | 3.176536  | 0.911886  | -3.770075 |
| 6                                | 4.410769  | 0.661266  | -0.347913 | 6  | 4.348114  | 1.883827  | -1.954952 |
| 6                                | 6.705170  | -0.340904 | 0.847620  | 6  | 4.356322  | 2.774557  | -0.871993 |
| 1                                | 7.255951  | -1.049938 | -1.116056 | 6  | 5.464265  | 1.061145  | -2.178903 |
| 6                                | 4.594844  | 0.840790  | 1.021371  | 6  | 5.459400  | 2.826258  | -0.020970 |
| 6                                | 5.753259  | 0.337745  | 1.616519  | 1  | 3.486889  | 3.374773  | -0.640292 |
| 1                                | 7.603087  | -0.727774 | 1.320689  | 6  | 6.563110  | 1.117455  | -1.329438 |
| 1                                | 3.840353  | 1.347547  | 1.612298  | 1  | 5.446988  | 0.390437  | -3.030664 |
| 1                                | 5.915443  | 0.471717  | 2.681981  | 6  | 6.560433  | 2.001456  | -0.245300 |
| 1                                | 3.562987  | 1.466346  | -3.366421 | 1  | 5.442686  | 3.496168  | 0.832470  |
| 1                                | 3.021894  | 2.163390  | -1.098503 | 1  | 7.421568  | 0.476400  | -1.507782 |
| 6                                | 1.763412  | 3.490850  | 0.541087  | 1  | 7.412963  | 2.038453  | 0.426665  |
| 6                                | 3.019338  | 4.017848  | 0.896637  | 1  | -1.098777 | -0.618931 | -2.205733 |
| 6                                | 1.129668  | 3.940991  | -0.632762 | 6  | 0.499423  | -1.987547 | 1.186080  |
| 6                                | 3.644868  | 4.953329  | 0.076908  | 6  | -0.255595 | -1.394224 | 2.217721  |
| 1                                | 3.499070  | 3.680125  | 1.808791  | 6  | 0.220157  | -1.415762 | 3.531470  |
| 6                                | 1.764428  | 4.881247  | -1.440218 | 6  | 1.453398  | -1.993585 | 3.822935  |
| 1                                | 0.156713  | 3.550667  | -0.903353 | 6  | 2.207203  | -2.572376 | 2.804995  |
| 6                                | 3.023567  | 5.381648  | -1.098597 | 6  | 1.727498  | -2.574731 | 1.494566  |
| 1                                | 4.617456  | 5.347352  | 0.356070  | 1  | -0.368175 | -0.945144 | 4.309705  |
| 1                                | 1.270186  | 5.218942  | -2.345940 | 1  | 1.831062  | -1.975503 | 4.839650  |
| 1                                | 3.514708  | 6.107729  | -1.739615 | 1  | 3.179697  | -3.001298 | 3.021113  |
|                                  |           |           |           | 1  | 2.320356  | -3.019624 | 0.704146  |
| <b>TS2_c</b>                     |           |           |           | 15 | -0.156972 | -1.984075 | -0.525510 |
| SCF Energy = -3539.427817        |           |           |           | 6  | -1.441612 | -3.284670 | -0.474247 |
| Gibbs Free Energy = -3538.659219 |           |           |           | 6  | -1.414093 | -4.308722 | 0.483717  |
|                                  |           |           |           | 6  | -2.496087 | -3.232555 | -1.396004 |
| 28                               | -0.920041 | -0.003903 | -0.927130 | 6  | -2.425213 | -5.269338 | 0.512262  |
| 8                                | 1.749252  | 2.921308  | 0.668959  | 1  | -0.608719 | -4.348110 | 1.209434  |

|                                  |           |           |           |    |           |           |           |
|----------------------------------|-----------|-----------|-----------|----|-----------|-----------|-----------|
| 6                                | -3.499916 | -4.198234 | -1.369176 |    |           |           |           |
| 1                                | -2.542247 | -2.419362 | -2.111194 | 28 | 0.613285  | 0.503864  | -1.199726 |
| 6                                | -3.467652 | -5.215800 | -0.414441 | 8  | -1.552013 | -3.044006 | -0.144051 |
| 1                                | -2.398543 | -6.057134 | 1.259213  | 16 | -1.269475 | -1.807254 | 0.637531  |
| 1                                | -4.318633 | -4.138222 | -2.077295 | 8  | -0.101857 | -1.950274 | 1.539473  |
| 1                                | -4.257196 | -5.960925 | -0.387423 | 8  | -1.234518 | -0.590034 | -0.254002 |
| 6                                | 1.199427  | -2.631528 | -1.550094 | 6  | -2.677340 | -1.486047 | 1.705858  |
| 6                                | 2.127533  | -1.708608 | -2.055080 | 6  | -3.680361 | -0.607323 | 1.302827  |
| 6                                | 1.332650  | -3.993335 | -1.850305 | 6  | -2.752704 | -2.122088 | 2.944111  |
| 6                                | 3.175635  | -2.145082 | -2.862285 | 6  | -4.769253 | -0.376879 | 2.138649  |
| 1                                | 2.021648  | -0.659242 | -1.807633 | 1  | -3.602038 | -0.105631 | 0.348195  |
| 6                                | 2.390561  | -4.425723 | -2.651067 | 6  | -3.846820 | -1.883097 | 3.772950  |
| 1                                | 0.611377  | -4.707895 | -1.467552 | 1  | -1.945568 | -2.776098 | 3.255238  |
| 6                                | 3.308128  | -3.503672 | -3.158521 | 6  | -4.873442 | -1.013109 | 3.381324  |
| 1                                | 3.857790  | -1.410907 | -3.274890 | 1  | -5.552680 | 0.303374  | 1.816110  |
| 1                                | 2.491076  | -5.481284 | -2.885843 | 1  | -3.904338 | -2.374274 | 4.741162  |
| 1                                | 4.121316  | -3.843369 | -3.793258 | 6  | -6.076561 | -0.787743 | 4.263362  |
| 6                                | -1.550334 | -0.753967 | 1.941417  | 1  | -5.839912 | -0.958593 | 5.317670  |
| 8                                | -2.457526 | -0.811666 | 2.942358  | 1  | -6.463481 | 0.230788  | 4.160796  |
| 6                                | -3.328767 | 0.244861  | 1.011609  | 1  | -6.892515 | -1.471547 | 3.997571  |
| 6                                | -3.710776 | -0.297138 | 2.418149  | 6  | 1.071607  | -1.163122 | -2.373307 |
| 7                                | -1.922096 | -0.179365 | 0.851206  | 6  | 0.176145  | -0.472387 | -2.893765 |
| 6                                | -4.739937 | -1.433658 | 2.210654  | 6  | -0.932830 | -0.181547 | -3.843948 |
| 1                                | -4.293034 | -2.389232 | 2.506878  | 1  | -0.515834 | 0.228345  | -4.770230 |
| 1                                | -5.632638 | -1.289264 | 2.828288  | 1  | -1.609809 | 0.565459  | -3.425556 |
| 6                                | -5.054267 | -1.393456 | 0.731093  | 8  | -1.627653 | -1.360919 | -4.212465 |
| 6                                | -5.993744 | -2.146572 | 0.029163  | 6  | -2.422079 | -1.912898 | -3.178605 |
| 6                                | -4.267835 | -0.452642 | 0.060964  | 1  | -2.692227 | -2.923217 | -3.503952 |
| 6                                | -6.132004 | -1.946556 | -1.346610 | 1  | -1.865684 | -2.016930 | -2.237767 |
| 1                                | -6.611651 | -2.878670 | 0.541472  | 6  | -3.700918 | -1.118467 | -2.920472 |
| 6                                | -4.398100 | -0.250791 | -1.311275 | 8  | -3.916284 | -0.070462 | -3.518280 |
| 6                                | -5.337905 | -1.007732 | -2.014189 | 6  | -4.670414 | -1.641353 | -1.912712 |
| 1                                | -6.864711 | -2.524269 | -1.902746 | 6  | -4.419009 | -2.791283 | -1.150623 |
| 1                                | -3.775487 | 0.477292  | -1.818465 | 6  | -5.866559 | -0.931836 | -1.716298 |
| 1                                | -5.457545 | -0.862435 | -3.083702 | 6  | -5.347107 | -3.213302 | -0.199695 |
| 1                                | -4.053345 | 0.470771  | 3.111912  | 1  | -3.479484 | -3.320493 | -1.237821 |
| 1                                | -3.374820 | 1.330914  | 0.930587  | 6  | -6.790695 | -1.358068 | -0.769770 |
| 6                                | -2.221277 | 2.859480  | -0.768479 | 1  | -6.048488 | -0.051539 | -2.322868 |
| 6                                | -1.913164 | 3.276023  | 0.544824  | 6  | -6.529707 | -2.501411 | -0.007053 |
| 6                                | -3.382168 | 3.357379  | -1.380359 | 1  | -5.129000 | -4.085765 | 0.407447  |
| 6                                | -2.749120 | 4.159379  | 1.207912  | 1  | -7.712671 | -0.803339 | -0.621772 |
| 1                                | -1.035072 | 2.883611  | 1.044683  | 1  | -7.244943 | -2.828619 | 0.742023  |
| 6                                | -4.229726 | 4.239177  | -0.711735 | 1  | 0.547105  | 1.454480  | -2.266115 |
| 1                                | -3.623818 | 3.044814  | -2.391164 | 6  | -0.677269 | 1.754557  | 1.498003  |
| 1                                | -2.520831 | 4.489818  | 2.215528  | 6  | 0.167455  | 0.922930  | 2.258677  |
| 1                                | -5.119813 | 4.600916  | -1.211155 | 6  | -0.209963 | 0.549637  | 3.552209  |
| 6                                | -3.913504 | 4.644273  | 0.590841  | 6  | -1.422192 | 0.979025  | 4.086935  |
| 8                                | -4.669624 | 5.496496  | 1.337849  | 6  | -2.257965 | 1.802132  | 3.337256  |
| 6                                | -5.847668 | 6.027382  | 0.753991  | 6  | -1.882112 | 2.192366  | 2.050890  |
| 1                                | -6.290042 | 6.681095  | 1.506757  | 1  | 0.438917  | -0.111086 | 4.112718  |
| 1                                | -5.622998 | 6.612472  | -0.146767 | 1  | -1.719970 | 0.653686  | 5.077908  |
| 1                                | -6.563146 | 5.235689  | 0.496487  | 1  | -3.212923 | 2.124260  | 3.738889  |
|                                  |           |           |           | 1  | -2.541366 | 2.821796  | 1.464807  |
| <b>TS2_g</b>                     |           |           |           | 15 | -0.178918 | 2.243422  | -0.195461 |
| SCF Energy = -3652.789602        |           |           |           | 6  | 1.022993  | 3.586132  | 0.099328  |
| Gibbs Free Energy = -3652.013346 |           |           |           | 6  | 0.929586  | 4.412943  | 1.229237  |

|   |           |           |           |    |           |           |           |
|---|-----------|-----------|-----------|----|-----------|-----------|-----------|
| 6 | 2.083228  | 3.762687  | -0.797895 | 1  | 7.293163  | -4.349833 | 2.086087  |
| 6 | 1.880443  | 5.408290  | 1.447903  |    |           |           |           |
| 1 | 0.122623  | 4.267730  | 1.939915  |    |           |           |           |
| 6 | 3.037171  | 4.753517  | -0.571774 |    |           |           |           |
| 1 | 2.172761  | 3.103454  | -1.652881 |    |           |           |           |
| 6 | 2.936039  | 5.577677  | 0.549101  |    |           |           |           |
| 1 | 1.803371  | 6.043844  | 2.324931  | 6  | 0.140412  | -2.959430 | -0.536507 |
| 1 | 3.869902  | 4.861802  | -1.258167 | 6  | -1.216595 | -3.278809 | -0.299793 |
| 1 | 3.683901  | 6.344132  | 0.729151  | 6  | -1.791224 | -4.390522 | -0.929789 |
| 6 | -1.671863 | 3.010608  | -0.899930 | 6  | -1.051871 | -5.185312 | -1.798700 |
| 6 | -2.649822 | 2.150543  | -1.423745 | 6  | 0.284168  | -4.877523 | -2.037000 |
| 6 | -1.865214 | 4.396438  | -0.942492 | 6  | 0.869306  | -3.780398 | -1.407795 |
| 6 | -3.808976 | 2.674932  | -1.990315 | 1  | -2.831733 | -4.613194 | -0.731022 |
| 1 | -2.492133 | 1.078510  | -1.382083 | 1  | -1.518428 | -6.036340 | -2.284478 |
| 6 | -3.032151 | 4.916121  | -1.506012 | 1  | 0.879300  | -5.488504 | -2.708751 |
| 1 | -1.108946 | 5.064148  | -0.543724 | 1  | 1.910685  | -3.562535 | -1.602578 |
| 6 | -4.000490 | 4.058536  | -2.030000 | 15 | 1.005660  | -1.526139 | 0.246423  |
| 1 | -4.533187 | 1.995407  | -2.424560 | 6  | 2.767180  | -1.953080 | -0.085411 |
| 1 | -3.178846 | 5.991593  | -1.541568 | 6  | 3.498804  | -2.868171 | 0.682898  |
| 1 | -4.900784 | 4.468211  | -2.478416 | 6  | 3.388304  | -1.321066 | -1.173000 |
| 6 | 1.433315  | 0.394275  | 1.723203  | 6  | 4.827213  | -3.147721 | 0.363464  |
| 8 | 2.365242  | 0.099773  | 2.649113  | 1  | 3.037527  | -3.350166 | 1.537381  |
| 6 | 3.130776  | -0.329200 | 0.464232  | 6  | 4.714298  | -1.605383 | -1.493803 |
| 6 | 3.513264  | -0.475503 | 1.957777  | 1  | 2.838884  | -0.587545 | -1.752779 |
| 7 | 1.744939  | 0.183806  | 0.489728  | 6  | 5.435565  | -2.520851 | -0.726422 |
| 6 | 4.788534  | 0.353106  | 2.196529  | 1  | 5.389619  | -3.851797 | 0.969344  |
| 1 | 4.663201  | 1.021968  | 3.054070  | 1  | 5.186448  | -1.094478 | -2.326642 |
| 1 | 5.625797  | -0.318248 | 2.413993  | 1  | 6.472314  | -2.734948 | -0.967281 |
| 6 | 5.013774  | 1.087433  | 0.891675  | 6  | 0.835872  | -1.824228 | 2.047617  |
| 6 | 5.990015  | 2.034987  | 0.585777  | 6  | 0.892229  | -0.731049 | 2.920906  |
| 6 | 4.110769  | 0.672488  | -0.091363 | 6  | 0.658757  | -3.111530 | 2.571473  |
| 6 | 6.057213  | 2.548505  | -0.712092 | 6  | 0.776481  | -0.921956 | 4.296945  |
| 1 | 6.694865  | 2.367604  | 1.342873  | 1  | 1.012104  | 0.269010  | 2.520908  |
| 6 | 4.174197  | 1.179149  | -1.386955 | 6  | 0.539500  | -3.300059 | 3.948200  |
| 6 | 5.158696  | 2.120098  | -1.695264 | 1  | 0.593472  | -3.964069 | 1.903232  |
| 1 | 6.816954  | 3.283908  | -0.960760 | 6  | 0.598471  | -2.206434 | 4.813737  |
| 1 | 3.456039  | 0.858118  | -2.134543 | 1  | 0.819749  | -0.065908 | 4.963518  |
| 1 | 5.224409  | 2.525688  | -2.700856 | 1  | 0.397301  | -4.301441 | 4.343541  |
| 1 | 3.603456  | -1.508528 | 2.287551  | 1  | 0.503451  | -2.354357 | 5.885187  |
| 1 | 3.157094  | -1.276215 | -0.060833 | 6  | -2.067548 | -2.492931 | 0.602276  |
| 6 | 2.040276  | -2.144354 | -1.988972 | 8  | -3.203462 | -3.125389 | 1.025224  |
| 6 | 3.359799  | -2.055596 | -2.471270 | 6  | -2.986761 | -0.927664 | 1.870254  |
| 6 | 1.715621  | -3.119880 | -1.026113 | 6  | -3.892852 | -2.205084 | 1.905852  |
| 6 | 4.361095  | -2.853279 | -1.928649 | 7  | -1.840797 | -1.311659 | 1.025712  |
| 1 | 3.602133  | -1.320200 | -3.229750 | 6  | -5.270254 | -1.827807 | 1.328479  |
| 6 | 2.719836  | -3.917075 | -0.487058 | 1  | -5.538424 | -2.516484 | 0.520828  |
| 1 | 0.695436  | -3.212775 | -0.673323 | 1  | -6.050972 | -1.909786 | 2.094185  |
| 6 | 4.033246  | -3.747383 | -0.914443 | 6  | -5.107494 | -0.399991 | 0.862995  |
| 1 | 5.391099  | -2.761011 | -2.254477 | 6  | -6.033477 | 0.390081  | 0.183122  |
| 1 | 2.494259  | -4.638535 | 0.290358  | 6  | -3.860752 | 0.123389  | 1.219528  |
| 8 | 5.049551  | -4.500783 | -0.312615 | 6  | -5.703010 | 1.713660  | -0.117724 |
| 6 | 5.704902  | -3.911167 | 0.731598  | 1  | -7.000412 | -0.014108 | -0.104184 |
| 8 | 5.456054  | -2.801500 | 1.142750  | 6  | -3.530762 | 1.444567  | 0.931703  |
| 6 | 6.756460  | -4.841293 | 1.275818  | 6  | -4.465049 | 2.240739  | 0.265119  |
| 1 | 6.284724  | -5.758311 | 1.640627  | 1  | -6.415769 | 2.340251  | -0.645826 |
| 1 | 7.450415  | -5.126499 | 0.480342  | 1  | -2.564766 | 1.845757  | 1.204041  |

**TS3C**  
SCF Energy = -3168.535744  
Gibbs Free Energy = -3167.735978

|    |           |           |           |    |           |           |           |
|----|-----------|-----------|-----------|----|-----------|-----------|-----------|
| 1  | -4.218529 | 3.273308  | 0.045530  | 1  | 2.383462  | 4.530693  | 0.232805  |
| 1  | -3.954575 | -2.685874 | 2.884478  | 1  | 2.034831  | 3.898826  | 1.836571  |
| 1  | -2.613553 | -0.617546 | 2.852013  | 1  | 2.256291  | 0.934428  | 0.699837  |
| 28 | 0.871807  | 0.604318  | -0.343264 |    |           |           |           |
| 6  | -1.342756 | -2.234794 | -3.732354 |    |           |           |           |
| 6  | -0.679256 | -1.252540 | -3.001402 |    |           |           |           |
| 6  | -1.384387 | -0.376898 | -2.159039 |    |           |           |           |
| 6  | -2.780335 | -0.523587 | -2.067057 |    |           |           |           |
| 6  | -3.442328 | -1.517791 | -2.784579 | 28 | -0.137407 | -0.067299 | -1.256912 |
| 6  | -2.727380 | -2.377657 | -3.620653 | 6  | 5.134166  | 0.108447  | -2.776362 |
| 1  | -0.777320 | -2.901546 | -4.376128 | 6  | 3.794915  | -0.236479 | -2.884932 |
| 1  | 0.399347  | -1.149352 | -3.077284 | 6  | 2.840251  | 0.299191  | -1.984288 |
| 1  | -3.335175 | 0.138634  | -1.414892 | 6  | 3.271346  | 1.238039  | -1.023672 |
| 1  | -4.520085 | -1.617568 | -2.688696 | 6  | 4.610183  | 1.589343  | -0.923323 |
| 1  | -3.242465 | -3.154480 | -4.178160 | 6  | 5.544402  | 1.014518  | -1.788830 |
| 6  | -0.689301 | 0.691464  | -1.430223 | 1  | 5.861634  | -0.310420 | -3.464044 |
| 6  | -1.055049 | 1.980662  | -1.543067 | 1  | 3.466379  | -0.914350 | -3.664466 |
| 6  | -2.008223 | 2.688368  | -2.464320 | 1  | 2.535258  | 1.687624  | -0.375074 |
| 1  | -3.015025 | 2.808185  | -2.046510 | 1  | 4.927471  | 2.304979  | -0.172388 |
| 1  | -2.098660 | 2.174897  | -3.430556 | 1  | 6.593068  | 1.283404  | -1.708607 |
| 8  | -1.448921 | 4.011999  | -2.640273 | 6  | 1.461692  | -0.070787 | -2.067737 |
| 6  | -0.134330 | 4.043944  | -2.072805 | 6  | 0.754360  | -1.038416 | -2.770121 |
| 1  | 0.622870  | 3.713569  | -2.796966 | 6  | 1.135562  | -2.512892 | -2.879959 |
| 1  | 0.073183  | 5.074828  | -1.771959 | 1  | 0.334207  | -3.038417 | -3.403804 |
| 6  | -0.161417 | 3.028257  | -0.912102 | 1  | 2.057549  | -2.649694 | -3.464478 |
| 8  | 1.077995  | 2.414591  | -0.652413 | 8  | 1.269522  | -3.189665 | -1.633919 |
| 6  | -0.786174 | 3.600016  | 0.365397  | 6  | 2.475067  | -2.980708 | -0.939622 |
| 6  | -1.744502 | 4.622099  | 0.327523  | 1  | 3.271356  | -2.654093 | -1.617898 |
| 6  | -0.449730 | 3.053832  | 1.610610  | 1  | 2.792202  | -3.943737 | -0.515098 |
| 6  | -2.338284 | 5.086187  | 1.503442  | 6  | 2.347674  | -2.006615 | 0.237102  |
| 1  | -2.038598 | 5.039457  | -0.629781 | 8  | 1.245742  | -1.624551 | 0.611446  |
| 6  | -1.039730 | 3.516402  | 2.785540  | 6  | 3.586566  | -1.578418 | 0.939283  |
| 1  | 0.278144  | 2.253361  | 1.647877  | 6  | 4.867730  | -1.737938 | 0.390106  |
| 6  | -1.990753 | 4.537205  | 2.737781  | 6  | 3.449784  | -0.955457 | 2.191836  |
| 1  | -3.078714 | 5.879538  | 1.451226  | 6  | 5.986241  | -1.258883 | 1.069110  |
| 1  | -0.758650 | 3.075793  | 3.738226  | 1  | 5.003710  | -2.206682 | -0.576922 |
| 1  | -2.455035 | 4.899097  | 3.650149  | 6  | 4.567698  | -0.485816 | 2.871278  |
| 14 | 3.150214  | 2.180313  | 0.440635  | 1  | 2.457294  | -0.858915 | 2.617021  |
| 8  | 3.852406  | 2.018462  | -1.050892 | 6  | 5.839152  | -0.630597 | 2.306280  |
| 8  | 4.315750  | 1.731439  | 1.549930  | 1  | 6.972493  | -1.375452 | 0.631916  |
| 6  | 3.537521  | 2.726519  | -2.247609 | 1  | 4.454528  | -0.019629 | 3.845100  |
| 1  | 4.475204  | 3.157185  | -2.620484 | 1  | 6.713110  | -0.262845 | 2.834726  |
| 1  | 2.846650  | 3.547296  | -2.035253 | 1  | -0.017059 | -0.706548 | -3.469211 |
| 6  | 2.929930  | 1.799766  | -3.289541 | 6  | -1.796165 | 2.517730  | -0.893582 |
| 1  | 1.973102  | 1.411221  | -2.932054 | 6  | -2.852851 | 1.849476  | -1.564178 |
| 1  | 2.757135  | 2.341753  | -4.226210 | 6  | -3.724384 | 2.568597  | -2.389381 |
| 1  | 3.605130  | 0.963821  | -3.501449 | 6  | -3.525069 | 3.931045  | -2.609873 |
| 6  | 5.027433  | 0.500343  | 1.573782  | 6  | -2.447533 | 4.576524  | -2.009066 |
| 1  | 5.243921  | 0.272092  | 2.624724  | 6  | -1.594239 | 3.875004  | -1.152039 |
| 1  | 4.405442  | -0.313757 | 1.186904  | 1  | -4.543236 | 2.047136  | -2.871355 |
| 6  | 6.321887  | 0.599604  | 0.777206  | 1  | -4.200210 | 4.477498  | -3.259518 |
| 1  | 6.882143  | -0.339505 | 0.838291  | 1  | -2.269278 | 5.630610  | -2.195610 |
| 1  | 6.100563  | 0.809629  | -0.271816 | 1  | -0.765443 | 4.394743  | -0.688151 |
| 1  | 6.946427  | 1.408326  | 1.168879  | 15 | -0.716141 | 1.512964  | 0.192027  |
| 6  | 2.777358  | 3.907502  | 1.036449  | 6  | -1.859044 | 0.819690  | 1.448454  |
| 1  | 3.704518  | 4.337907  | 1.425994  | 6  | -3.101483 | 1.399520  | 1.731783  |

**TS3D**

SCF Energy = -2529.880704

Gibbs Free Energy = -2529.252596

|                                  |           |           |           |    |           |           |           |
|----------------------------------|-----------|-----------|-----------|----|-----------|-----------|-----------|
| 6                                | -1.430144 | -0.305714 | 2.166000  | 1  | -3.900584 | 2.747114  | -1.677381 |
| 6                                | -3.914977 | 0.848654  | 2.723336  | 6  | -6.094448 | 1.625076  | 0.699526  |
| 1                                | -3.438110 | 2.273423  | 1.184162  | 1  | -5.528167 | 1.124426  | 2.718271  |
| 6                                | -2.240544 | -0.838320 | 3.165768  | 1  | -6.326354 | 2.239933  | -1.350175 |
| 1                                | -0.480573 | -0.772720 | 1.928768  | 6  | -7.546552 | 1.264116  | 0.890061  |
| 6                                | -3.484542 | -0.268222 | 3.441169  | 1  | -7.891909 | 1.510595  | 1.898782  |
| 1                                | -4.878847 | 1.299064  | 2.939756  | 1  | -7.703469 | 0.187759  | 0.745882  |
| 1                                | -1.912354 | -1.717756 | 3.707405  | 1  | -8.186484 | 1.786434  | 0.173603  |
| 1                                | -4.118450 | -0.694955 | 4.211999  | 6  | 1.325408  | 1.368124  | -2.292822 |
| 6                                | 0.331353  | 2.583204  | 1.237753  | 6  | 0.443072  | 0.547960  | -2.729988 |
| 6                                | 1.514316  | 2.000875  | 1.716853  | 6  | -0.261041 | 0.043187  | -3.942260 |
| 6                                | -0.064208 | 3.834506  | 1.733036  | 1  | 0.122200  | 0.570364  | -4.822731 |
| 6                                | 2.323529  | 2.683494  | 2.623441  | 1  | -0.044855 | -1.026323 | -4.058786 |
| 1                                | 1.785403  | 1.001383  | 1.396963  | 8  | -1.666554 | 0.260878  | -3.977547 |
| 6                                | 0.751502  | 4.518231  | 2.633914  | 6  | -2.383577 | -0.158501 | -2.839006 |
| 1                                | -1.012563 | 4.269026  | 1.439348  | 1  | -3.412935 | 0.195398  | -2.969790 |
| 6                                | 1.950762  | 3.951334  | 3.071233  | 1  | -1.993736 | 0.309055  | -1.925862 |
| 1                                | 3.239184  | 2.219604  | 2.976487  | 6  | -2.402222 | -1.660742 | -2.630490 |
| 1                                | 0.443387  | 5.490772  | 3.004350  | 8  | -1.825286 | -2.420483 | -3.402633 |
| 1                                | 2.580636  | 4.489556  | 3.772325  | 6  | -3.112032 | -2.194424 | -1.427002 |
| 6                                | -3.035364 | 0.388250  | -1.473355 | 6  | -3.635562 | -1.362296 | -0.427111 |
| 8                                | -4.284394 | -0.067867 | -1.644812 | 6  | -3.248383 | -3.586601 | -1.308869 |
| 6                                | -2.733160 | -1.841553 | -1.354496 | 6  | -4.291357 | -1.920590 | 0.669788  |
| 6                                | -4.253007 | -1.513904 | -1.447735 | 1  | -3.512521 | -0.289793 | -0.477206 |
| 7                                | -2.105889 | -0.497427 | -1.304675 | 6  | -3.895658 | -4.140743 | -0.209875 |
| 6                                | -4.892840 | -1.912357 | -0.100196 | 1  | -2.840980 | -4.208015 | -2.099502 |
| 1                                | -5.147437 | -1.008277 | 0.464582  | 6  | -4.422506 | -3.305466 | 0.780804  |
| 1                                | -5.817450 | -2.479766 | -0.241357 | 1  | -4.684584 | -1.263458 | 1.437452  |
| 6                                | -3.814341 | -2.710666 | 0.595519  | 1  | -3.999641 | -5.218479 | -0.125245 |
| 6                                | -3.916348 | -3.447814 | 1.772894  | 1  | -4.933787 | -3.736290 | 1.637187  |
| 6                                | -2.598740 | -2.654037 | -0.091765 | 1  | 2.102955  | 0.545970  | -1.205131 |
| 6                                | -2.785676 | -4.114296 | 2.251725  | 6  | 0.060546  | 0.027814  | 2.313974  |
| 1                                | -4.858308 | -3.507477 | 2.309927  | 6  | -0.674412 | -1.142506 | 2.023001  |
| 6                                | -1.466365 | -3.314683 | 0.376616  | 6  | -1.731185 | -1.526880 | 2.853448  |
| 6                                | -1.569622 | -4.043380 | 1.563330  | 6  | -2.090682 | -0.733902 | 3.942522  |
| 1                                | -2.853886 | -4.697702 | 3.165041  | 6  | -1.383426 | 0.436224  | 4.214264  |
| 1                                | -0.530066 | -3.259275 | -0.166175 | 6  | -0.308208 | 0.811734  | 3.404863  |
| 1                                | -0.702098 | -4.570912 | 1.947778  | 1  | -2.276078 | -2.433662 | 2.623207  |
| 1                                | -4.753831 | -1.955714 | -2.308676 | 1  | -2.922735 | -1.030292 | 4.573561  |
| 1                                | -2.331526 | -2.361253 | -2.230531 | 1  | -1.665126 | 1.062598  | 5.055043  |
|                                  |           |           |           | 1  | 0.232549  | 1.727795  | 3.607653  |
|                                  |           |           |           | 15 | 1.470790  | 0.471228  | 1.235289  |
| <b>TS3</b>                       |           |           |           | 6  | 2.724365  | -0.797947 | 1.669332  |
| SCF Energy = -3424.890985        |           |           |           | 6  | 2.582857  | -1.661679 | 2.762766  |
| Gibbs Free Energy = -3424.152378 |           |           |           | 6  | 3.861840  | -0.906705 | 0.856213  |
|                                  |           |           |           | 6  | 3.562071  | -2.620308 | 3.034126  |
| 28                               | 0.751008  | 0.232119  | -0.823005 | 6  | 3.562071  | -2.620308 | 3.034126  |
| 8                                | -1.445796 | 3.157440  | -1.194407 | 1  | 1.710062  | -1.589539 | 3.401715  |
| 16                               | -1.614647 | 2.355212  | 0.035835  | 6  | 4.843982  | -1.850638 | 1.138232  |
| 8                                | -1.016222 | 2.910908  | 1.269586  | 1  | 3.967300  | -0.260060 | -0.008727 |
| 8                                | -1.240120 | 0.893818  | -0.165191 | 6  | 4.693526  | -2.714537 | 2.225343  |
| 6                                | -3.377791 | 2.192989  | 0.323753  | 1  | 3.439935  | -3.287081 | 3.882690  |
| 6                                | -3.823292 | 1.744006  | 1.567853  | 1  | 5.712476  | -1.931242 | 0.493845  |
| 6                                | -4.273148 | 2.382096  | -0.726476 | 1  | 5.453311  | -3.461197 | 2.435476  |
| 6                                | -5.175794 | 1.469103  | 1.748801  | 6  | 2.191554  | 2.030223  | 1.832213  |
| 1                                | -3.110828 | 1.612144  | 2.373837  | 6  | 1.968591  | 3.198427  | 1.090876  |
| 6                                | -5.625077 | 2.096470  | -0.532331 | 6  | 3.006114  | 2.071187  | 2.974184  |



|    |           |           |           |    |           |           |           |
|----|-----------|-----------|-----------|----|-----------|-----------|-----------|
| 1  | -2.584026 | -1.794931 | 0.657707  | 1  | 1.572812  | -3.130799 | 2.429580  |
| 6  | -4.232035 | -0.408793 | 3.883182  | 6  | 2.749760  | -5.458112 | -0.433042 |
| 1  | -2.749692 | 1.149691  | 3.795154  | 1  | 1.031336  | -4.696549 | -1.517092 |
| 6  | -4.745162 | -1.552626 | 3.265515  | 6  | 3.489791  | -5.415547 | 0.754741  |
| 1  | -4.553075 | -2.927725 | 1.612451  | 1  | 3.595740  | -4.549770 | 2.726216  |
| 1  | -4.692256 | -0.023512 | 4.788163  | 1  | 3.071199  | -6.114066 | -1.237831 |
| 1  | -5.607920 | -2.056225 | 3.691821  | 6  | 4.752941  | -6.225214 | 0.910371  |
| 6  | 1.657787  | 1.692287  | 0.676883  | 1  | 4.889634  | -6.560405 | 1.942970  |
| 8  | 2.542141  | 2.713970  | 0.720496  | 1  | 5.634418  | -5.629700 | 0.641222  |
| 6  | 1.307101  | 2.691148  | -1.300908 | 1  | 4.745609  | -7.107121 | 0.263812  |
| 6  | 2.327471  | 3.522032  | -0.469493 | 6  | -1.640487 | 0.135623  | -2.067071 |
| 7  | 0.955176  | 1.575216  | -0.396499 | 6  | -0.488542 | 0.025403  | -2.619001 |
| 6  | 1.650018  | 4.866717  | -0.116210 | 6  | 0.224406  | -0.185699 | -3.911638 |
| 1  | 1.464265  | 4.911203  | 0.962747  | 1  | -0.513719 | -0.276526 | -4.715949 |
| 1  | 2.285693  | 5.720631  | -0.372911 | 1  | 0.851177  | 0.691904  | -4.115677 |
| 6  | 0.357505  | 4.855258  | -0.901997 | 8  | 1.003554  | -1.371370 | -4.004306 |
| 6  | -0.578584 | 5.879027  | -1.035243 | 6  | 1.913544  | -1.595086 | -2.951493 |
| 6  | 0.159674  | 3.635955  | -1.554746 | 1  | 2.330022  | -2.597425 | -3.105986 |
| 6  | -1.713014 | 5.663285  | -1.820904 | 1  | 1.405624  | -1.601558 | -1.979044 |
| 1  | -0.431055 | 6.832064  | -0.535249 | 6  | 3.050756  | -0.593791 | -2.885413 |
| 6  | -0.970554 | 3.413519  | -2.338063 | 8  | 3.143047  | 0.323191  | -3.695960 |
| 6  | -1.911625 | 4.437359  | -2.464720 | 6  | 4.040647  | -0.727112 | -1.771972 |
| 1  | -2.446882 | 6.455933  | -1.934586 | 6  | 3.874351  | -1.635899 | -0.717123 |
| 1  | -1.112892 | 2.461403  | -2.837961 | 6  | 5.172971  | 0.102419  | -1.797059 |
| 1  | -2.796062 | 4.285111  | -3.076146 | 6  | 4.833805  | -1.714493 | 0.292128  |
| 1  | 3.298590  | 3.635821  | -0.949032 | 1  | 2.993166  | -2.258093 | -0.654803 |
| 1  | 1.720076  | 2.280821  | -2.223143 | 6  | 6.123943  | 0.027584  | -0.785177 |
| 6  | -3.103792 | -1.151870 | -1.938394 | 1  | 5.281558  | 0.792841  | -2.627005 |
| 6  | -3.120783 | -2.546938 | -2.074625 | 6  | 5.956271  | -0.886032 | 0.260844  |
| 6  | -4.292636 | -0.487826 | -1.587353 | 1  | 4.686224  | -2.418485 | 1.103621  |
| 6  | -4.300302 | -3.264385 | -1.877405 | 1  | 6.998865  | 0.670516  | -0.811388 |
| 1  | -2.188441 | -3.066110 | -2.261225 | 1  | 6.701242  | -0.949595 | 1.049132  |
| 6  | -5.469415 | -1.192547 | -1.400041 | 1  | -1.455587 | 1.266141  | -1.013332 |
| 1  | -4.281596 | 0.589279  | -1.446239 | 6  | 0.641583  | 0.195904  | 2.341959  |
| 6  | -5.479588 | -2.589489 | -1.540483 | 6  | 1.968438  | 0.426210  | 1.916274  |
| 1  | -4.279398 | -4.343107 | -1.968480 | 6  | 3.037452  | -0.072660 | 2.666570  |
| 1  | -6.391600 | -0.692836 | -1.124600 | 6  | 2.796988  | -0.832829 | 3.810428  |
| 8  | -6.678698 | -3.195693 | -1.311888 | 6  | 1.486994  | -1.083946 | 4.215829  |
| 6  | -6.737303 | -4.609639 | -1.413568 | 6  | 0.413864  | -0.567118 | 3.485168  |
| 1  | -6.068965 | -5.093906 | -0.690352 | 1  | 4.048599  | 0.124141  | 2.333285  |
| 1  | -7.769166 | -4.885550 | -1.192473 | 1  | 3.632120  | -1.229013 | 4.379562  |
| 1  | -6.478564 | -4.952666 | -2.423154 | 1  | 1.293742  | -1.683445 | 5.100065  |
|    |           |           |           | 1  | -0.604374 | -0.771593 | 3.792733  |
|    |           |           |           | 15 | -0.732605 | 0.916846  | 1.372601  |
|    |           |           |           | 6  | -0.582329 | 2.710373  | 1.739469  |
|    |           |           |           | 6  | 0.259032  | 3.214696  | 2.739012  |
|    |           |           |           | 6  | -1.341649 | 3.605048  | 0.971455  |
|    |           |           |           | 6  | 0.341452  | 4.591373  | 2.961938  |
|    |           |           |           | 1  | 0.851121  | 2.536856  | 3.343344  |
|    |           |           |           | 6  | -1.270970 | 4.974296  | 1.206231  |
|    |           |           |           | 1  | -1.977210 | 3.225439  | 0.177968  |
|    |           |           |           | 6  | -0.423858 | 5.471854  | 2.199036  |
|    |           |           |           | 1  | 0.999894  | 4.970947  | 3.737818  |
|    |           |           |           | 1  | -1.854961 | 5.654936  | 0.596530  |
|    |           |           |           | 1  | -0.357873 | 6.541857  | 2.371272  |
|    |           |           |           | 6  | -2.308867 | 0.442113  | 2.142597  |
| 28 | -0.269209 | 0.497918  | -0.731999 |    |           |           |           |
| 8  | -0.890419 | -3.142623 | -1.011628 |    |           |           |           |
| 16 | -0.132020 | -2.662717 | 0.164441  |    |           |           |           |
| 8  | -0.884370 | -2.546442 | 1.432313  |    |           |           |           |
| 8  | 0.666335  | -1.402493 | -0.134675 |    |           |           |           |
| 6  | 1.203808  | -3.829688 | 0.433214  |    |           |           |           |
| 6  | 1.911607  | -3.784501 | 1.634802  |    |           |           |           |
| 6  | 1.610024  | -4.670982 | -0.600212 |    |           |           |           |
| 6  | 3.044163  | -4.578945 | 1.789364  |    |           |           |           |

**TS3\_g**

SCF Energy = -3652.781311

Gibbs Free Energy = -3652.006938



|    |           |           |           |    |           |           |           |
|----|-----------|-----------|-----------|----|-----------|-----------|-----------|
| 6  | -3.110417 | -0.511179 | 1.499981  | 6  | -1.236500 | -1.426394 | 2.158265  |
| 6  | -2.762600 | 1.058772  | 3.319144  | 6  | -2.402806 | -0.684450 | 2.468745  |
| 6  | -4.359990 | -0.841459 | 2.023131  | 6  | -2.862121 | -0.650153 | 3.793208  |
| 1  | -2.753452 | -1.004266 | 0.607264  | 6  | -2.189825 | -1.331823 | 4.802446  |
| 6  | -4.005314 | 0.715365  | 3.847299  | 6  | -1.050223 | -2.070649 | 4.495934  |
| 1  | -2.152129 | 1.811423  | 3.808441  | 6  | -0.581142 | -2.112612 | 3.184081  |
| 6  | -4.804082 | -0.228909 | 3.195856  | 1  | -3.746854 | -0.070370 | 4.021793  |
| 1  | -4.983938 | -1.563654 | 1.508124  | 1  | -2.553833 | -1.278984 | 5.823334  |
| 1  | -4.354422 | 1.191728  | 4.758797  | 1  | -0.517100 | -2.607223 | 5.274578  |
| 1  | -5.778315 | -0.485472 | 3.602070  | 1  | 0.318831  | -2.671169 | 2.958125  |
| 6  | 2.264170  | 1.230523  | 0.716093  | 15 | -0.516122 | -1.368125 | 0.479406  |
| 8  | 3.389016  | 1.977490  | 0.780302  | 6  | -1.525680 | -2.530411 | -0.514268 |
| 6  | 2.205622  | 2.324254  | -1.242212 | 6  | -2.420716 | -3.436674 | 0.065715  |
| 6  | 3.403594  | 2.838196  | -0.391973 | 6  | -1.380306 | -2.513585 | -1.909339 |
| 7  | 1.561943  | 1.327621  | -0.359729 | 6  | -3.157017 | -4.310225 | -0.735533 |
| 6  | 3.103222  | 4.306820  | -0.011249 | 1  | -2.543620 | -3.455463 | 1.143432  |
| 1  | 2.920817  | 4.376033  | 1.066991  | 6  | -2.095157 | -3.405351 | -2.706417 |
| 1  | 3.946242  | 4.966376  | -0.242236 | 1  | -0.718286 | -1.786740 | -2.368483 |
| 6  | 1.864424  | 4.655892  | -0.806076 | 6  | -2.989892 | -4.303138 | -2.120310 |
| 6  | 1.238036  | 5.895031  | -0.925390 | 1  | -3.858588 | -4.999569 | -0.275667 |
| 6  | 1.354687  | 3.545415  | -1.483588 | 1  | -1.969082 | -3.386289 | -3.785099 |
| 6  | 0.095645  | 6.004162  | -1.721516 | 1  | -3.559759 | -4.987867 | -2.740952 |
| 1  | 1.629861  | 6.765243  | -0.406532 | 6  | 1.106929  | -2.214094 | 0.617618  |
| 6  | 0.214397  | 3.646818  | -2.277147 | 6  | 2.150648  | -1.519832 | 1.256717  |
| 6  | -0.417102 | 4.887177  | -2.389487 | 6  | 1.359694  | -3.474015 | 0.056940  |
| 1  | -0.397975 | 6.966198  | -1.824369 | 6  | 3.416756  | -2.095077 | 1.345883  |
| 1  | -0.171628 | 2.776124  | -2.796413 | 1  | 1.954642  | -0.548119 | 1.700703  |
| 1  | -1.303320 | 4.987960  | -3.008985 | 6  | 2.638902  | -4.031647 | 0.129597  |
| 1  | 4.373351  | 2.700932  | -0.867957 | 1  | 0.562703  | -4.018028 | -0.437871 |
| 1  | 2.501837  | 1.834682  | -2.170595 | 6  | 3.668292  | -3.346919 | 0.776878  |
| 6  | -3.053314 | -0.203516 | -1.990464 | 1  | 4.213531  | -1.553440 | 1.845322  |
| 6  | -3.430976 | -1.555116 | -2.069557 | 1  | 2.825152  | -5.006311 | -0.312328 |
| 6  | -4.027945 | 0.774766  | -1.745444 | 1  | 4.663137  | -3.777764 | 0.829074  |
| 6  | -4.767256 | -1.914978 | -1.916772 | 6  | -3.184543 | 0.046592  | 1.459020  |
| 1  | -2.660131 | -2.309430 | -2.177014 | 8  | -4.390785 | 0.497132  | 1.894953  |
| 6  | -5.364125 | 0.417839  | -1.600162 | 6  | -4.078429 | 0.905406  | -0.381532 |
| 1  | -3.732371 | 1.815842  | -1.655027 | 6  | -4.977326 | 1.283510  | 0.824885  |
| 6  | -5.719309 | -0.925247 | -1.686826 | 7  | -2.887393 | 0.279886  | 0.225793  |
| 1  | -5.065044 | -2.956255 | -1.954516 | 6  | -6.399748 | 0.794737  | 0.519043  |
| 1  | -6.131050 | 1.160767  | -1.411309 | 1  | -6.857756 | 0.344953  | 1.405228  |
| 8  | -7.078056 | -1.239400 | -1.594467 | 1  | -7.031655 | 1.641297  | 0.222622  |
| 6  | -7.508786 | -2.021457 | -0.557976 | 6  | -6.210391 | -0.177613 | -0.624150 |
| 8  | -6.794391 | -2.441799 | 0.319095  | 6  | -7.132403 | -1.072305 | -1.164151 |
| 6  | -8.990045 | -2.265983 | -0.684699 | 6  | -4.916862 | -0.095326 | -1.151195 |
| 1  | -9.525420 | -1.312697 | -0.709665 | 6  | -6.743010 | -1.885174 | -2.231680 |
| 1  | -9.200773 | -2.782820 | -1.625423 | 1  | -8.137403 | -1.144238 | -0.757386 |
| 1  | -9.331130 | -2.867409 | 0.156744  | 6  | -4.523456 | -0.907290 | -2.210866 |
|    |           |           |           | 6  | -5.446374 | -1.805123 | -2.749408 |
|    |           |           |           | 1  | -7.450896 | -2.590536 | -2.657069 |
|    |           |           |           | 1  | -3.509342 | -0.866713 | -2.589113 |
|    |           |           |           | 1  | -5.149203 | -2.454495 | -3.566735 |
|    |           |           |           | 1  | -4.921531 | 2.332515  | 1.125228  |
| 28 | -0.590106 | 0.763432  | -0.272645 | 1  | -3.783251 | 1.763647  | -0.985979 |
| 6  | 0.444603  | 0.770796  | -1.662049 | 6  | 1.575861  | -0.086718 | -2.117509 |
| 6  | 0.122890  | 2.111506  | -1.668249 | 1  | 1.417937  | -1.126431 | -1.804591 |
| 1  | 0.898810  | 2.799196  | -1.323370 | 1  | 1.614251  | -0.069553 | -3.222550 |

**TS4B**

SCF Energy = -3351.083698

Gibbs Free Energy = -3350.310154

|                                  |           |           |           |    |           |           |           |
|----------------------------------|-----------|-----------|-----------|----|-----------|-----------|-----------|
| 8                                | 2.796263  | 0.389220  | -1.565084 | 6  | -3.473174 | 3.856903  | 2.553982  |
| 6                                | 3.827481  | -0.551299 | -1.714856 | 6  | -2.146329 | 4.035818  | 2.937782  |
| 1                                | 3.475220  | -1.563557 | -1.467241 | 6  | -1.118929 | 3.415651  | 2.223299  |
| 1                                | 4.203681  | -0.581389 | -2.753242 | 1  | -4.798015 | 2.887545  | 1.155586  |
| 6                                | 4.981731  | -0.216324 | -0.780950 | 1  | -4.274887 | 4.345872  | 3.097980  |
| 8                                | 4.983424  | 0.798480  | -0.105819 | 1  | -1.903530 | 4.665269  | 3.788577  |
| 6                                | 6.108421  | -1.196608 | -0.707795 | 1  | -0.088974 | 3.579349  | 2.517350  |
| 6                                | 7.143927  | -0.933972 | 0.200417  | 15 | -0.061436 | 1.721720  | 0.192176  |
| 6                                | 6.152243  | -2.366558 | -1.480329 | 6  | 1.492150  | 2.278575  | 0.976675  |
| 6                                | 8.201686  | -1.826673 | 0.339379  | 6  | 1.979610  | 3.588711  | 0.855006  |
| 1                                | 7.088082  | -0.024786 | 0.788986  | 6  | 2.215529  | 1.333220  | 1.714919  |
| 6                                | 7.214531  | -3.258116 | -1.343823 | 6  | 3.166164  | 3.955366  | 1.486861  |
| 1                                | 5.358558  | -2.594379 | -2.183172 | 1  | 1.430890  | 4.313872  | 0.261428  |
| 6                                | 8.238436  | -2.991073 | -0.432726 | 6  | 3.397740  | 1.708417  | 2.355750  |
| 1                                | 8.997092  | -1.619004 | 1.048408  | 1  | 1.863107  | 0.309020  | 1.751494  |
| 1                                | 7.242316  | -4.161757 | -1.944800 | 6  | 3.872111  | 3.016000  | 2.244821  |
| 1                                | 9.063080  | -3.689174 | -0.324424 | 1  | 3.541822  | 4.969640  | 1.388660  |
| 8                                | -0.865935 | 1.724728  | 1.395114  | 1  | 3.953409  | 0.974327  | 2.928777  |
| 16                               | 0.257916  | 2.133814  | 2.368833  | 1  | 4.796191  | 3.302653  | 2.738275  |
| 8                                | 1.079910  | 0.965590  | 2.754424  | 6  | -0.059482 | 2.635424  | -1.411612 |
| 8                                | -0.315078 | 2.949737  | 3.447220  | 6  | 0.841611  | 2.204951  | -2.399614 |
| 6                                | 1.297180  | 3.196568  | 1.370746  | 6  | -0.937688 | 3.685606  | -1.709266 |
| 6                                | 2.455606  | 2.696817  | 0.783006  | 6  | 0.860495  | 2.812030  | -3.653694 |
| 6                                | 0.862557  | 4.495382  | 1.098874  | 1  | 1.546679  | 1.408528  | -2.189255 |
| 6                                | 3.177436  | 3.501109  | -0.098407 | 6  | -0.923669 | 4.284853  | -2.971224 |
| 1                                | 2.783059  | 1.685151  | 0.980302  | 1  | -1.634836 | 4.042733  | -0.959815 |
| 6                                | 1.591350  | 5.287934  | 0.216343  | 6  | -0.027563 | 3.849999  | -3.947107 |
| 1                                | -0.037750 | 4.867469  | 1.575486  | 1  | 1.571452  | 2.469922  | -4.400076 |
| 6                                | 2.756037  | 4.801455  | -0.398467 | 1  | -1.612208 | 5.097169  | -3.186002 |
| 1                                | 4.065695  | 3.086879  | -0.562715 | 1  | -0.017185 | 4.318375  | -4.926855 |
| 1                                | 1.254023  | 6.298232  | -0.001938 | 6  | -3.139281 | 1.479196  | -0.329419 |
| 6                                | 3.548785  | 5.672020  | -1.342021 | 8  | -4.305112 | 1.774526  | -0.953433 |
| 1                                | 4.271842  | 6.290164  | -0.795372 | 6  | -3.343344 | -0.222941 | -1.769676 |
| 1                                | 2.899201  | 6.352086  | -1.901923 | 6  | -4.490936 | 0.800729  | -2.019958 |
| 1                                | 4.112404  | 5.068552  | -2.059198 | 7  | -2.510627 | 0.428587  | -0.733317 |
| 6                                | -0.977164 | 2.807426  | -2.476726 | 6  | -5.828141 | 0.064065  | -1.846558 |
| 6                                | -1.901861 | 1.788560  | -3.155457 | 1  | -6.509660 | 0.649041  | -1.220962 |
| 1                                | -2.722457 | 2.293399  | -3.676090 | 1  | -6.318439 | -0.068723 | -2.818767 |
| 1                                | -1.350197 | 1.192290  | -3.891166 | 6  | -5.442499 | -1.267540 | -1.243833 |
| 1                                | -2.326226 | 1.095314  | -2.428302 | 6  | -6.284208 | -2.266953 | -0.757513 |
| 6                                | -0.274292 | 3.656392  | -3.557522 | 6  | -4.056283 | -1.453622 | -1.251775 |
| 1                                | -1.010310 | 4.205441  | -4.156519 | 6  | -5.721553 | -3.454181 | -0.283538 |
| 1                                | 0.402568  | 4.384120  | -3.098489 | 1  | -7.361623 | -2.126609 | -0.747234 |
| 1                                | 0.313332  | 3.025276  | -4.232497 | 6  | -3.491679 | -2.646189 | -0.801835 |
| 6                                | -1.770510 | 3.744793  | -1.547827 | 6  | -4.335849 | -3.644481 | -0.311391 |
| 1                                | -1.101854 | 4.479732  | -1.090555 | 1  | -6.365945 | -4.238373 | 0.102921  |
| 1                                | -2.546735 | 4.282427  | -2.105378 | 1  | -2.419334 | -2.787246 | -0.826642 |
| 1                                | -2.233342 | 3.188982  | -0.728871 | 1  | -3.910560 | -4.575647 | 0.050617  |
|                                  |           |           |           | 1  | -4.411693 | 1.349201  | -2.960970 |
|                                  |           |           |           | 1  | -2.719087 | -0.429455 | -2.641949 |
| <b>TS4C</b>                      |           |           |           | 28 | -0.823456 | -0.300991 | 0.156952  |
| SCF Energy = -3168.563399        |           |           |           | 6  | -0.449373 | -0.743329 | 5.093475  |
| Gibbs Free Energy = -3167.771728 |           |           |           | 6  | 0.128644  | -0.983838 | 3.847968  |
| 6                                | -1.394407 | 2.585862  | 1.133646  | 6  | -0.659954 | -1.328786 | 2.735216  |
| 6                                | -2.749542 | 2.381329  | 0.768671  | 6  | -2.053359 | -1.422181 | 2.918408  |
| 6                                | -3.770585 | 3.038954  | 1.465684  | 6  | -2.628884 | -1.189262 | 4.165224  |

|    |           |           |           |    |           |           |           |
|----|-----------|-----------|-----------|----|-----------|-----------|-----------|
| 6  | -1.831462 | -0.844139 | 5.259244  | 6  | -1.953839 | 4.924655  | 1.650277  |
| 1  | 0.181862  | -0.473320 | 5.935715  | 6  | -1.300169 | 4.081724  | 0.761491  |
| 1  | 1.202249  | -0.886852 | 3.722178  | 6  | -1.603351 | 2.701516  | 0.732228  |
| 1  | -2.678074 | -1.681620 | 2.069392  | 6  | -2.638669 | 2.210738  | 1.553265  |
| 1  | -3.705657 | -1.274855 | 4.282836  | 6  | -3.301629 | 3.064802  | 2.428071  |
| 1  | -2.282510 | -0.654786 | 6.228887  | 6  | -2.950565 | 4.414629  | 2.491786  |
| 6  | -0.038719 | -1.520843 | 1.398415  | 1  | -1.701602 | 5.980216  | 1.683541  |
| 6  | 1.074165  | -2.293604 | 1.269504  | 1  | -0.549367 | 4.474231  | 0.084360  |
| 6  | 1.650959  | -3.291196 | 2.242700  | 1  | -2.952588 | 1.181739  | 1.420319  |
| 1  | 0.926840  | -3.670134 | 2.966997  | 1  | -4.106790 | 2.679752  | 3.046237  |
| 1  | 2.530483  | -2.913814 | 2.796415  | 1  | -3.467985 | 5.078741  | 3.178090  |
| 8  | 2.069320  | -4.377627 | 1.397283  | 6  | -0.939432 | 1.818297  | -0.180109 |
| 6  | 2.666557  | -3.761100 | 0.270456  | 6  | -0.058772 | 1.975479  | -1.249323 |
| 1  | 3.704189  | -3.474023 | 0.494282  | 6  | 1.255054  | 2.699856  | -1.138536 |
| 1  | 2.665902  | -4.472605 | -0.558025 | 1  | 1.280210  | 3.579709  | -1.804673 |
| 6  | 1.860324  | -2.457091 | -0.020560 | 1  | 1.420779  | 3.029016  | -0.110154 |
| 8  | 2.763923  | -1.340050 | -0.139969 | 8  | 2.301231  | 1.799953  | -1.532409 |
| 6  | 0.941286  | -2.560492 | -1.225032 | 6  | 3.601896  | 2.293943  | -1.374123 |
| 6  | 0.245100  | -3.749353 | -1.476891 | 1  | 3.720992  | 3.295836  | -1.823496 |
| 6  | 0.691361  | -1.451238 | -2.038504 | 1  | 4.261562  | 1.610336  | -1.918571 |
| 6  | -0.645919 | -3.836896 | -2.545750 | 6  | 4.073657  | 2.355137  | 0.083934  |
| 1  | 0.387586  | -4.599518 | -0.816507 | 8  | 3.299182  | 2.145762  | 1.005899  |
| 6  | -0.199863 | -1.536369 | -3.112043 | 6  | 5.511805  | 2.662281  | 0.341451  |
| 1  | 1.216301  | -0.528156 | -1.843988 | 6  | 6.427069  | 2.934880  | -0.686210 |
| 6  | -0.869774 | -2.730927 | -3.372039 | 6  | 5.954081  | 2.661284  | 1.673114  |
| 1  | -1.173898 | -4.767773 | -2.730688 | 6  | 7.761367  | 3.201451  | -0.384551 |
| 1  | -0.362602 | -0.661220 | -3.735075 | 1  | 6.108487  | 2.942138  | -1.722891 |
| 1  | -1.563605 | -2.803526 | -4.204355 | 6  | 7.286196  | 2.923807  | 1.972496  |
| 14 | 3.926532  | -0.935590 | -1.241608 | 1  | 5.229224  | 2.449103  | 2.451377  |
| 8  | 5.372245  | -0.733014 | -0.451678 | 6  | 8.192390  | 3.194690  | 0.943044  |
| 8  | 3.592491  | 0.553864  | -1.878724 | 1  | 8.464469  | 3.412183  | -1.184226 |
| 6  | 5.927273  | -1.652984 | 0.481579  | 1  | 7.621945  | 2.918824  | 3.004918  |
| 1  | 7.017350  | -1.567696 | 0.406602  | 1  | 9.233019  | 3.399891  | 1.175569  |
| 1  | 5.671918  | -2.687824 | 0.211253  | 1  | -0.440511 | 1.793384  | -2.254861 |
| 6  | 5.466128  | -1.349882 | 1.900158  | 6  | -1.863319 | -2.840737 | -0.110937 |
| 1  | 4.377347  | -1.418258 | 1.963291  | 6  | -1.257987 | -3.209610 | -1.335976 |
| 1  | 5.910078  | -2.054851 | 2.611265  | 6  | -1.878154 | -4.144868 | -2.175955 |
| 1  | 5.765209  | -0.335782 | 2.179984  | 6  | -3.120146 | -4.676263 | -1.847784 |
| 6  | 4.165336  | 1.781292  | -1.401209 | 6  | -3.752689 | -4.263412 | -0.678372 |
| 1  | 3.412387  | 2.558377  | -1.559874 | 6  | -3.127235 | -3.360020 | 0.179586  |
| 1  | 4.354938  | 1.719280  | -0.326591 | 1  | -1.389843 | -4.417373 | -3.103527 |
| 6  | 5.444983  | 2.108969  | -2.152777 | 1  | -3.602856 | -5.380548 | -2.517286 |
| 1  | 5.836706  | 3.080088  | -1.829741 | 1  | -4.744909 | -4.628876 | -0.434316 |
| 1  | 6.203523  | 1.346155  | -1.958712 | 1  | -3.653007 | -3.018458 | 1.059485  |
| 1  | 5.257025  | 2.152947  | -3.230150 | 15 | -1.090480 | -1.566387 | 0.966556  |
| 6  | 4.063486  | -2.179289 | -2.623726 | 6  | 0.512056  | -2.320568 | 1.508247  |
| 1  | 4.880820  | -1.898797 | -3.294757 | 6  | 0.988369  | -3.569734 | 1.099078  |
| 1  | 4.270807  | -3.183334 | -2.239343 | 6  | 1.274926  | -1.567132 | 2.413292  |
| 1  | 3.138123  | -2.228284 | -3.202550 | 6  | 2.209182  | -4.050733 | 1.576332  |
| 1  | -1.095928 | -1.777063 | 0.471358  | 1  | 0.410739  | -4.175085 | 0.409739  |
|    |           |           |           | 6  | 2.478491  | -2.059426 | 2.908665  |
|    |           |           |           | 1  | 0.921215  | -0.591019 | 2.733088  |
|    |           |           |           | 6  | 2.953688  | -3.302051 | 2.485472  |
|    |           |           |           | 1  | 2.573959  | -5.015877 | 1.237508  |
|    |           |           |           | 1  | 3.055267  | -1.463657 | 3.609954  |
|    |           |           |           | 1  | 3.903141  | -3.678075 | 2.853626  |
| 28 | -0.583227 | 0.130218  | -0.528754 |    |           |           |           |

**TS4**

SCF Energy = -3424.882968

Gibbs Free Energy = -3424.140233

|                                  |           |           |           |    |           |           |           |
|----------------------------------|-----------|-----------|-----------|----|-----------|-----------|-----------|
| 6                                | -1.934118 | -1.674443 | 2.597037  | 6  | -3.030280 | 2.767593  | -2.218146 |
| 6                                | -2.074196 | -0.510224 | 3.358645  | 6  | -2.968764 | 4.154443  | -2.090668 |
| 6                                | -2.268507 | -2.907509 | 3.178700  | 6  | -1.983954 | 4.737339  | -1.295822 |
| 6                                | -2.587716 | -0.564428 | 4.655248  | 6  | -1.056663 | 3.933713  | -0.627498 |
| 1                                | -1.768269 | 0.440976  | 2.944424  | 1  | -3.796672 | 2.304377  | -2.827678 |
| 6                                | -2.789748 | -2.961378 | 4.469081  | 1  | -3.689884 | 4.775014  | -2.611643 |
| 1                                | -2.111301 | -3.827532 | 2.626568  | 1  | -1.932879 | 5.816194  | -1.192032 |
| 6                                | -2.959455 | -1.788220 | 5.208676  | 1  | -0.292205 | 4.392269  | -0.010340 |
| 1                                | -2.693815 | 0.351842  | 5.228645  | 15 | 0.107961  | 1.501437  | 0.137171  |
| 1                                | -3.053750 | -3.921554 | 4.902435  | 6  | -0.652690 | 1.042285  | 1.722499  |
| 1                                | -3.365291 | -1.832901 | 6.214935  | 6  | -1.913006 | 1.514853  | 2.106451  |
| 6                                | -0.025607 | -2.582868 | -1.825216 | 6  | 0.048426  | 0.155026  | 2.556688  |
| 8                                | 0.673431  | -3.282261 | -2.749257 | 6  | -2.466291 | 1.106370  | 3.320477  |
| 6                                | 1.728637  | -1.252284 | -2.218344 | 1  | -2.460467 | 2.196377  | 1.464564  |
| 6                                | 1.740628  | -2.420676 | -3.240411 | 6  | -0.501366 | -0.229484 | 3.776131  |
| 7                                | 0.454140  | -1.430837 | -1.499142 | 1  | 1.005177  | -0.253435 | 2.247934  |
| 6                                | 3.102333  | -3.125276 | -3.137025 | 6  | -1.760322 | 0.242257  | 4.157100  |
| 1                                | 2.970643  | -4.211289 | -3.095573 | 1  | -3.446432 | 1.468538  | 3.612909  |
| 1                                | 3.709205  | -2.909155 | -4.024781 | 1  | 0.045841  | -0.909084 | 4.421651  |
| 6                                | 3.723867  | -2.547347 | -1.884403 | 1  | -2.191928 | -0.068550 | 5.103051  |
| 6                                | 4.921048  | -2.907081 | -1.266511 | 6  | 1.516260  | 2.588334  | 0.507607  |
| 6                                | 2.951163  | -1.504891 | -1.364129 | 6  | 1.758010  | 3.078339  | 1.797005  |
| 6                                | 5.331710  | -2.208092 | -0.128876 | 6  | 2.390683  | 2.916153  | -0.541177 |
| 1                                | 5.529023  | -3.715281 | -1.664225 | 6  | 2.874197  | 3.882408  | 2.035074  |
| 6                                | 3.339428  | -0.825867 | -0.213907 | 1  | 1.086039  | 2.826308  | 2.609855  |
| 6                                | 4.544791  | -1.177051 | 0.394825  | 6  | 3.495811  | 3.727427  | -0.299225 |
| 1                                | 6.265800  | -2.473999 | 0.357628  | 1  | 2.206820  | 2.534676  | -1.541974 |
| 1                                | 2.717454  | -0.040291 | 0.191941  | 6  | 3.741512  | 4.205853  | 0.991440  |
| 1                                | 4.863908  | -0.650313 | 1.288459  | 1  | 3.063422  | 4.255704  | 3.036272  |
| 1                                | 1.471489  | -2.135653 | -4.260331 | 1  | 4.167732  | 3.982464  | -1.112426 |
| 1                                | 1.746933  | -0.255953 | -2.661835 | 1  | 4.608563  | 4.830293  | 1.181095  |
| 8                                | -3.754566 | -0.435688 | 0.119909  | 6  | -2.223691 | 0.495820  | -1.695759 |
| 16                               | -3.749305 | -0.199827 | -1.357264 | 8  | -3.396126 | 0.038822  | -2.145721 |
| 8                                | -4.809405 | -0.901020 | -2.101586 | 6  | -1.998397 | -1.730580 | -1.498038 |
| 8                                | -2.377241 | -0.390101 | -1.971934 | 6  | -3.289046 | -1.424758 | -2.291952 |
| 6                                | -4.028177 | 1.574160  | -1.499430 | 7  | -1.339801 | -0.406007 | -1.404330 |
| 6                                | -4.904788 | 2.202600  | -0.614655 | 6  | -4.452113 | -2.106294 | -1.565706 |
| 6                                | -3.320172 | 2.327292  | -2.432650 | 1  | -5.348279 | -1.479207 | -1.579637 |
| 6                                | -5.029249 | 3.587813  | -0.634039 | 1  | -4.705349 | -3.042519 | -2.077658 |
| 1                                | -5.443457 | 1.605254  | 0.112348  | 6  | -3.901951 | -2.360003 | -0.179599 |
| 6                                | -3.446433 | 3.716085  | -2.440100 | 6  | -4.586768 | -2.735251 | 0.974309  |
| 1                                | -2.653733 | 1.819626  | -3.119973 | 6  | -2.516170 | -2.172541 | -0.145263 |
| 6                                | -4.283206 | 4.368442  | -1.527844 | 6  | -3.868059 | -2.908274 | 2.159807  |
| 1                                | -5.690083 | 4.077215  | 0.076743  | 1  | -5.662329 | -2.884143 | 0.957517  |
| 1                                | -2.872748 | 4.303830  | -3.152661 | 6  | -1.797695 | -2.329732 | 1.036132  |
| 6                                | -4.348998 | 5.873562  | -1.467548 | 6  | -2.485007 | -2.701832 | 2.192318  |
| 1                                | -3.969326 | 6.330339  | -2.385927 | 1  | -4.390130 | -3.198079 | 3.066321  |
| 1                                | -3.743625 | 6.250453  | -0.633361 | 1  | -0.731791 | -2.142149 | 1.063769  |
| 1                                | -5.373230 | 6.226265  | -1.309767 | 1  | -1.943526 | -2.821627 | 3.124533  |
|                                  |           |           |           | 1  | -3.241121 | -1.624235 | -3.363939 |
|                                  |           |           |           | 1  | -1.305062 | -2.425246 | -1.972359 |
| <b>TS7_iso</b>                   |           |           |           | 1  | 0.528483  | -0.279463 | -1.048874 |
| SCF Energy = -2437.450569        |           |           |           | 28 | 0.850480  | -1.880902 | -1.881025 |
| Gibbs Free Energy = -2436.890072 |           |           |           | 8  | 2.793706  | -1.209103 | -0.247334 |
|                                  |           |           |           | 14 | 2.011476  | 0.006352  | -0.952703 |
| 6                                | -1.101050 | 2.543429  | -0.750919 | 1  | 3.594407  | -1.865566 | -1.524250 |
| 6                                | -2.100021 | 1.953849  | -1.559853 | 8  |           |           |           |

|   |          |           |           |   |           |           |           |
|---|----------|-----------|-----------|---|-----------|-----------|-----------|
| 8 | 2.060609 | -2.208322 | 0.817200  | 6 | 5.118895  | -3.300927 | 0.618294  |
| 6 | 5.017107 | -1.788526 | -1.749606 | 1 | 4.709023  | -3.854189 | -1.425772 |
| 1 | 5.385313 | -0.792574 | -1.476364 | 1 | 5.304116  | -2.537196 | 2.626439  |
| 1 | 5.155151 | -1.908818 | -2.827110 | 1 | 5.910808  | -4.032860 | 0.740454  |
| 6 | 5.762999 | -2.868034 | -0.984399 | 6 | 0.408286  | 2.166349  | -1.502039 |
| 1 | 5.408852 | -3.861322 | -1.271117 | 8 | -0.219640 | 3.322883  | -1.720496 |
| 1 | 6.834116 | -2.807937 | -1.201186 | 6 | -1.760980 | 1.607292  | -1.247501 |
| 1 | 5.628147 | -2.753516 | 0.095842  | 6 | -1.665070 | 3.059406  | -1.780315 |
| 6 | 1.495597 | -3.523801 | 0.602967  | 7 | -0.351131 | 1.129062  | -1.324672 |
| 1 | 0.918830 | -3.741217 | 1.505668  | 6 | -2.397428 | 3.970590  | -0.790080 |
| 1 | 0.822405 | -3.475307 | -0.254619 | 1 | -1.839055 | 4.897022  | -0.626138 |
| 6 | 2.581356 | -4.563236 | 0.389877  | 1 | -3.374685 | 4.252855  | -1.199094 |
| 1 | 2.131619 | -5.559570 | 0.332486  | 6 | -2.546612 | 3.112796  | 0.446274  |
| 1 | 3.116995 | -4.375635 | -0.543385 | 6 | -2.986791 | 3.493346  | 1.712942  |
| 1 | 3.297513 | -4.557047 | 1.216844  | 6 | -2.226893 | 1.776403  | 0.184045  |
| 6 | 3.866449 | -0.086041 | 0.787099  | 6 | -3.107642 | 2.519197  | 2.706066  |
| 1 | 4.662608 | -0.659354 | 1.271752  | 1 | -3.239294 | 4.528253  | 1.924097  |
| 1 | 4.317928 | 0.710951  | 0.189982  | 6 | -2.347854 | 0.798883  | 1.169850  |
| 1 | 3.273007 | 0.392241  | 1.570908  | 6 | -2.794374 | 1.183174  | 2.434739  |
| 1 | 1.594715 | -1.853166 | -2.498632 | 1 | -3.452981 | 2.801528  | 3.695795  |

**TS7**

SCF Energy = -2437.458557

Gibbs Free Energy = -2436.896551

|    |           |           |           |   |           |           |           |
|----|-----------|-----------|-----------|---|-----------|-----------|-----------|
| 28 | 0.085536  | -0.710738 | -1.190932 | 8 | -3.412691 | -1.188256 | -1.670494 |
| 8  | 0.329851  | -2.496784 | -1.242911 | 8 | -2.131311 | -2.350189 | 0.247214  |
| 6  | 2.629848  | 1.243867  | -0.765834 | 6 | -4.643336 | -1.211270 | -0.930940 |
| 6  | 1.875083  | 2.224844  | -1.449391 | 1 | -4.434048 | -0.979508 | 0.118887  |
| 6  | 2.524354  | 3.311896  | -2.048014 | 1 | -5.254348 | -0.400682 | -1.339268 |
| 6  | 3.912898  | 3.418412  | -1.992671 | 6 | -5.374474 | -2.539513 | -1.051775 |
| 6  | 4.658989  | 2.448882  | -1.325175 | 1 | -4.799551 | -3.349281 | -0.590767 |
| 6  | 4.019216  | 1.369387  | -0.710817 | 1 | -6.341312 | -2.485463 | -0.541392 |
| 1  | 1.934063  | 4.064674  | -2.556584 | 1 | -5.554269 | -2.790083 | -2.101269 |
| 1  | 4.407740  | 4.257554  | -2.469526 | 6 | -1.503037 | -3.340863 | 1.057820  |
| 1  | 5.740022  | 2.528846  | -1.277888 | 1 | -1.692586 | -4.338328 | 0.643295  |
| 1  | 4.605474  | 0.620995  | -0.190045 | 1 | -0.418958 | -3.182839 | 1.049286  |
| 15 | 1.793532  | -0.169821 | 0.034125  | 6 | -2.051136 | -3.225964 | 2.468902  |
| 6  | 1.214658  | 0.398484  | 1.661850  | 1 | -1.843617 | -2.232194 | 2.877354  |
| 6  | 1.133953  | 1.758929  | 1.982145  | 1 | -3.133289 | -3.380680 | 2.476235  |
| 6  | 0.745452  | -0.561696 | 2.573119  | 1 | -1.589183 | -3.974611 | 3.120004  |
| 6  | 0.594957  | 2.153929  | 3.205987  | 6 | -2.075477 | -3.687523 | -2.439585 |
| 1  | 1.492857  | 2.509184  | 1.286476  | 1 | -1.434578 | -4.461714 | -2.015738 |
| 6  | 0.226543  | -0.160750 | 3.800986  | 1 | -3.097738 | -4.064886 | -2.534782 |
| 1  | 0.796838  | -1.617979 | 2.329214  | 1 | -1.702695 | -3.453721 | -3.440864 |
| 6  | 0.146595  | 1.197751  | 4.116390  | 1 | -1.194475 | -1.064878 | -2.094946 |
| 1  | 0.526994  | 3.209495  | 3.446548  | 1 | 0.919386  | -2.843519 | -0.562294 |
| 1  | -0.120930 | -0.907440 | 4.507708  |   |           |           |           |
| 1  | -0.268443 | 1.509310  | 5.069251  |   |           |           |           |
| 6  | 3.075022  | -1.422421 | 0.309529  |   |           |           |           |
| 6  | 3.422813  | -2.266676 | -0.759859 |   |           |           |           |
| 6  | 3.758833  | -1.521224 | 1.531432  |   |           |           |           |
| 6  | 4.444151  | -3.201617 | -0.600352 | 6 | 0.297340  | 2.590938  | 0.965232  |
| 1  | 2.891200  | -2.195561 | -1.703114 | 6 | -0.982030 | 3.038776  | 0.540678  |
| 6  | 4.777111  | -2.461517 | 1.680876  | 6 | -1.590673 | 4.127323  | 1.187705  |
| 1  | 3.496470  | -0.869613 | 2.357417  | 6 | -0.971093 | 4.766962  | 2.256070  |

**TS8**

SCF Energy = -3257.194467

Gibbs Free Energy = -3256.519582

|    |           |           |           |    |           |           |           |
|----|-----------|-----------|-----------|----|-----------|-----------|-----------|
| 6  | 0.282138  | 4.330808  | 2.679711  | 1  | -4.481752 | -3.293118 | -1.583645 |
| 6  | 0.903240  | 3.261468  | 2.035638  | 1  | -3.574621 | 2.934367  | -2.950050 |
| 1  | -2.562734 | 4.458859  | 0.844339  | 1  | -2.155654 | 0.916421  | -3.032001 |
| 1  | -1.463920 | 5.598490  | 2.749095  | 28 | -0.783824 | -0.336127 | -0.433500 |
| 1  | 0.782765  | 4.821532  | 3.508866  | 8  | -0.290967 | -2.058661 | 0.197319  |
| 1  | 1.880162  | 2.936176  | 2.372345  | 16 | 0.095791  | -3.285713 | -0.754478 |
| 15 | 1.126282  | 1.147866  | 0.160253  | 8  | -0.943769 | -3.481282 | -1.771687 |
| 6  | 2.570609  | 0.859681  | 1.250930  | 8  | 0.496241  | -4.418210 | 0.076678  |
| 6  | 3.894248  | 1.143635  | 0.889180  | 6  | 1.547942  | -2.602520 | -1.542933 |
| 6  | 2.320214  | 0.200225  | 2.468484  | 6  | 1.652136  | -2.623123 | -2.930561 |
| 6  | 4.947582  | 0.779024  | 1.730770  | 6  | 2.577789  | -2.091829 | -0.750388 |
| 1  | 4.101108  | 1.644129  | -0.050376 | 6  | 2.806876  | -2.118920 | -3.530621 |
| 6  | 3.373190  | -0.145065 | 3.312918  | 1  | 0.833034  | -3.018919 | -3.519860 |
| 1  | 1.301225  | -0.046435 | 2.753997  | 6  | 3.717706  | -1.585674 | -1.364887 |
| 6  | 4.690930  | 0.137753  | 2.943264  | 1  | 2.480277  | -2.073228 | 0.328094  |
| 1  | 5.969965  | 1.001567  | 1.438694  | 6  | 3.848895  | -1.587206 | -2.761408 |
| 1  | 3.161980  | -0.650485 | 4.249680  | 1  | 2.894396  | -2.130393 | -4.613654 |
| 1  | 5.512136  | -0.144692 | 3.594965  | 1  | 4.508315  | -1.167405 | -0.749857 |
| 6  | 1.842187  | 1.943117  | -1.332435 | 14 | -1.283032 | -1.720647 | 1.941726  |
| 6  | 1.929691  | 1.170592  | -2.498062 | 1  | -1.377242 | -0.345892 | 1.085281  |
| 6  | 2.319334  | 3.262539  | -1.345661 | 8  | -1.046082 | -0.692600 | 3.277024  |
| 6  | 2.501254  | 1.703220  | -3.654352 | 8  | -0.475241 | -3.027965 | 2.567928  |
| 1  | 1.540105  | 0.160374  | -2.495185 | 6  | -1.607481 | 0.602285  | 3.402798  |
| 6  | 2.886272  | 3.794363  | -2.503229 | 1  | -2.681921 | 0.521948  | 3.625759  |
| 1  | 2.247350  | 3.871339  | -0.449716 | 1  | -1.515306 | 1.156320  | 2.458714  |
| 6  | 2.980959  | 3.013900  | -3.658697 | 6  | -0.899215 | 1.352870  | 4.520414  |
| 1  | 2.565701  | 1.091932  | -4.549534 | 1  | 0.165358  | 1.461186  | 4.294582  |
| 1  | 3.253856  | 4.816349  | -2.504879 | 1  | -1.324926 | 2.354573  | 4.638693  |
| 1  | 3.421872  | 3.430075  | -4.559804 | 1  | -0.997162 | 0.812869  | 5.466618  |
| 6  | -1.754560 | 2.422022  | -0.551159 | 6  | 0.901727  | -3.135125 | 2.887726  |
| 8  | -2.684450 | 3.223400  | -1.126340 | 1  | 1.224270  | -4.137958 | 2.592387  |
| 6  | -2.698745 | 1.068003  | -2.095356 | 1  | 1.495429  | -2.426668 | 2.295287  |
| 6  | -3.493858 | 2.395880  | -2.006167 | 6  | 1.142405  | -2.896554 | 4.373112  |
| 7  | -1.697347 | 1.216886  | -1.010640 | 1  | 2.204052  | -3.024184 | 4.615842  |
| 6  | -4.868853 | 2.060744  | -1.380832 | 1  | 0.824272  | -1.889070 | 4.653904  |
| 1  | -4.919168 | 2.473045  | -0.366275 | 1  | 0.564988  | -3.610224 | 4.968443  |
| 1  | -5.690594 | 2.509949  | -1.948217 | 6  | -3.014662 | -2.353960 | 1.670295  |
| 6  | -4.920348 | 0.547879  | -1.384368 | 1  | -3.325147 | -2.955643 | 2.529262  |
| 6  | -5.985051 | -0.280164 | -1.031817 | 1  | -3.726877 | -1.538402 | 1.518285  |
| 6  | -3.710503 | -0.010714 | -1.807197 | 1  | -3.038371 | -2.985401 | 0.778973  |
| 6  | -5.816540 | -1.665495 | -1.108640 | 6  | 5.060635  | -0.972897 | -3.413069 |
| 1  | -6.931703 | 0.141002  | -0.704712 | 1  | 4.946256  | 0.116428  | -3.474103 |
| 6  | -3.533579 | -1.390802 | -1.888652 | 1  | 5.969947  | -1.175997 | -2.839703 |
| 6  | -4.603211 | -2.215833 | -1.534939 | 1  | 5.204931  | -1.349010 | -4.429619 |
| 1  | -6.637642 | -2.321204 | -0.834407 | 1  | -0.416016 | -0.532825 | -1.827196 |
| 1  | -2.584185 | -1.822166 | -2.187486 |    |           |           |           |
